# Supplementary material for: Deciphering a hexameric protein complex with Angstrom optical resolution
Source: eLife journal article supplement (doi:10.7554/elife.76308), 2022-05-13
Supplement: fig1-data1 [file Figure 1 -source data 1.xlsx]

## Sheet: Figure 1 b,c
		Molecule 1 (b)					Molecule 2 ©
		frame #	Polarization	Fit	Residual		frame #	Polarization	Fit	Residual
		1	6.07649	16.7714	-10.6949		1	65.0244	65.849	-0.82458
		2	17.5029	16.7714	0.73154		2	65.8936	65.849	0.0446
		3	10.2636	16.7714	-6.50773		3	65.8538	65.849	0.0048
		4	13.9681	16.7714	-2.80327		4	69.5367	65.849	3.68764
		5	15.0965	16.7714	-1.6748		5	69.2023	65.849	3.35325
		6	10.5025	16.7714	-6.26886		6	65.4624	65.849	-0.38667
		7	16.1399	16.7714	-0.63141		7	63.4774	65.849	-2.3716
		8	15.6687	16.7714	-1.10264		8	66.3073	65.849	0.4583
		9	19.6018	16.7714	2.83043		9	64.8079	65.849	-1.04108
		10	12.6298	16.7714	-4.14151		10	63.4663	65.849	-2.38274
		11	3.18843	16.7714	-13.5829		11	69.1694	65.849	3.32043
		12	10.7351	16.7714	-6.03627		12	71.2332	65.849	5.38422
		13	28.8639	16.7714	12.0926		13	68.8145	65.849	2.96548
		14	17.9046	16.7714	1.1332		14	63.5501	65.849	-2.29891
		15	10.3526	16.7714	-6.41874		15	70.7134	65.849	4.86434
		16	10.5868	16.7714	-6.1845		16	69.2849	65.849	3.43585
		17	20.3514	16.7714	3.58004		17	64.3425	65.849	-1.50655
		18	13.1168	16.7714	-3.6545		18	63.6341	65.849	-2.21489
		19	20.9436	16.7714	4.17225		19	64.847	65.849	-1.00207
		20	15.8113	16.7714	-0.96007		20	66.3616	65.849	0.51261
		21	21.355	16.7714	4.5837		21	62.9881	65.849	-2.86088
		22	18.4111	16.7714	1.63974		22	64.3697	65.849	-1.47935
		23	12.9172	16.7714	-3.85412		23	64.5406	65.849	-1.30838
		24	5.91947	16.7714	-10.8519		24	64.6106	65.849	-1.23839
		25	4.84984	16.7714	-11.9215		25	71.8378	65.849	5.98881
		26	21.9154	16.7714	5.144		26	65.478	65.849	-0.37097
		27	20.2619	16.7714	3.49058		27	71.9233	65.849	6.07426
		28	15.2021	16.7714	-1.56922		28	67.3188	65.849	1.46978
		29	18.6757	16.7714	1.90438		29	68.6833	65.849	2.8343
		30	19.0616	16.7714	2.29025		30	67.8727	65.849	2.02372
		31	5.48316	16.7714	-11.2882		31	69.3538	65.849	3.5048
		32	21.8924	16.7714	5.12109		32	66.3251	65.849	0.47603
		33	14.1894	16.7714	-2.58198		33	70.869	65.849	5.01999
		34	13.891	16.7714	-2.8804		34	71.7093	65.849	5.8603
		35	18.5251	16.7714	1.75376		35	71.4527	65.849	5.60364
		36	9.64967	16.7714	-7.12168		36	71.7104	65.849	5.86138
		37	8.42187	16.7714	-8.34948		37	70.5519	65.849	4.70289
		38	6.86733	16.7714	-9.90401		38	71.8671	65.849	6.01803
		39	21.5997	16.7714	4.82833		39	67.5403	65.849	1.69124
		40	11.3632	16.7714	-5.40815		40	64.9288	65.849	-0.92021
		41	5.87106	16.7714	-10.9003		41	64.8073	65.849	-1.04171
		42	12.6078	16.7714	-4.16354		42	67.3706	65.849	1.52155
		43	10.4079	16.7714	-6.36343		43	68.1632	65.849	2.31417
		44	20.1318	16.7714	3.36043		44	68.5231	65.849	2.67404
		45	21.3221	16.7714	4.55079		45	67.7285	65.849	1.8795
		46	12.3145	16.7714	-4.45685		46	64.7862	65.849	-1.0628
		47	22.7975	16.7714	6.02617		47	71.7151	65.849	5.86604
		48	12.5253	16.7714	-4.24605		48	68.207	65.849	2.35794
		49	22.5803	16.7714	5.80896		49	69.583	65.849	3.73402
		50	16.4213	16.7714	-0.35006		50	69.1328	65.849	3.28382
		51	21.0487	16.7714	4.2774		51	65.7046	65.849	-0.14439
		52	20.0156	16.7714	3.24425		52	70.3056	65.849	4.45656
		53	23.7499	16.7714	6.9786		53	70.2195	65.849	4.37048
		54	11.9948	16.7714	-4.7765		54	70.2379	65.849	4.38887
		55	9.86052	16.7714	-6.91082		55	70.2431	65.849	4.39411
		56	15.3507	16.7714	-1.42066		56	67.4434	65.849	1.59434
		57	6.44065	16.7714	-10.3307		57	70.3425	65.849	4.49347
		58	10.2317	16.7714	-6.53961		58	67.751	65.849	1.90199
		59	18.0191	16.7714	1.24776		59	72.2082	65.849	6.35913
		60	13.2781	16.7714	-3.49326		60	66.7071	65.849	0.85804
		61	15.292	16.7714	-1.47936		61	72.6893	65.849	6.84023
		62	15.1089	16.7714	-1.66245		62	66.8704	65.849	1.02137
		63	26.5108	16.7714	9.7394		63	70.2879	65.849	4.43887
		64	17.133	16.7714	0.36164		64	70.4248	65.849	4.57578
		65	20.4514	16.7714	3.68007		65	69.039	65.849	3.19001
		66	9.94061	16.7714	-6.83073		66	69.869	65.849	4.01996
		67	13.8298	16.7714	-2.94152		67	68.3356	65.849	2.48661
		68	12.0359	16.7714	-4.73547		68	68.3124	65.849	2.46342
		69	23.4198	16.7714	6.6485		69	68.7583	65.849	2.90926
		70	16.7033	16.7714	-0.06806		70	70.9743	65.849	5.12526
		71	17.8358	16.7714	1.06447		71	69.7045	65.849	3.85544
		72	22.4057	16.7714	5.63433		72	69.6997	65.849	3.85063
		73	19.3088	16.7714	2.53746		73	71.1541	65.849	5.3051
		74	16.6364	16.7714	-0.13498		74	66.9411	65.849	1.09206
		75	20.719	16.7714	3.94763		75	71.4688	65.849	5.61979
		76	0.98419	16.7714	-15.7872		76	70.497	65.849	4.64794
		77	19.3251	16.7714	2.55375		77	72.2227	65.849	6.37367
		78	10.5867	16.7714	-6.18465		78	69.587	65.849	3.73793
		79	5.84568	16.7714	-10.9257		79	70.5317	65.849	4.68268
		80	9.26564	16.7714	-7.50571		80	70.0421	65.849	4.1931
		81	19.3852	16.7714	2.61386		81	66.9702	65.849	1.1212
		82	15.5118	16.7714	-1.25958		82	74.8484	65.849	8.99937
		83	22.2947	16.7714	5.5234		83	70.1459	65.849	4.29686
		84	24.0246	16.7714	7.25323		84	65.6771	65.849	-0.1719
		85	25.2597	16.7714	8.48836		85	69.4635	65.849	3.61447
		86	14.7433	16.7714	-2.02803		86	70.3149	65.849	4.46588
		87	26.7026	16.7714	9.93126		87	74.7185	65.849	8.86945
		88	22.8356	16.7714	6.06423		88	73.2648	65.849	7.41576
		89	23.3187	16.7714	6.54739		89	63.8546	65.849	-1.99444
		90	15.3314	16.7714	-1.43993		90	64.2563	65.849	-1.5927
		91	10.086	16.7714	-6.68534		91	68.0133	65.849	2.1643
		92	3.30666	16.7714	-13.4647		92	64.8537	65.849	-0.99532
		93	12.2398	16.7714	-4.53151		93	62.9959	65.849	-2.85312
		94	20.5566	16.7714	3.78527		94	70.1103	65.849	4.26129
		95	15.2223	16.7714	-1.54901		95	66.5759	65.849	0.72688
		96	16.4857	16.7714	-0.28562		96	65.6782	65.849	-0.17088
		97	22.3397	16.7714	5.5684		97	68.8897	65.849	3.04069
		98	15.3241	16.7714	-1.44726		98	63.0586	65.849	-2.79038
		99	14.7813	16.7714	-1.99003		99	63.1225	65.849	-2.7265
		100	15.1407	16.7714	-1.63068		100	71.2856	65.849	5.43654
		101	20.2807	16.7714	3.50931		101	64.2421	65.849	-1.60696
		102	22.2248	16.7714	5.45351		102	67.1442	65.849	1.29515
		103	20.8299	16.7714	4.05852		103	68.7477	65.849	2.89872
		104	18.3921	16.7714	1.62074		104	71.3791	65.849	5.53006
		105	21.8525	16.7714	5.08117		105	63.066	65.849	-2.78306
		106	17.7019	16.7714	0.93058		106	65.8609	65.849	0.0119
		107	17.6488	16.7714	0.87749		107	64.4553	65.849	-1.39368
		108	12.608	16.7714	-4.16337		108	65.2649	65.849	-0.58415
		109	9.69304	16.7714	-7.0783		109	67.6127	65.849	1.76371
		110	23.253	16.7714	6.48165		110	64.7411	65.849	-1.10791
		111	9.87398	16.7714	-6.89737		111	72.2822	65.849	6.43316
		112	20.1195	16.7714	3.34814		112	65.4897	65.849	-0.35932
		113	20.1378	16.7714	3.36643		113	66.5387	65.849	0.68968
		114	19.915	16.7714	3.14362		114	68.5737	65.849	2.72466
		115	15.5221	16.7714	-1.24923		115	64.6682	65.849	-1.18079
		116	20.8027	16.7714	4.03132		116	66.9711	65.849	1.12208
		117	10.585	16.7714	-6.18635		117	66.2867	65.849	0.43773
		118	21.2524	16.7714	4.48101		118	63.5607	65.849	-2.28827
		119	10.2021	16.7714	-6.56922		119	67.959	65.849	2.10995
		120	16.3394	16.7714	-0.4319		120	68.1717	65.849	2.32272
		121	4.56591	16.7714	-12.2054		121	65.1907	65.849	-0.65827
		122	17.1815	16.7714	0.41019		122	63.9082	65.849	-1.94081
		123	9.96403	16.7714	-6.80731		123	69.0521	65.849	3.20308
		124	23.6701	16.7714	6.89873		124	66.514	65.849	0.66494
		125	10.7313	16.7714	-6.04004		125	69.3469	65.849	3.49788
		126	15.1731	16.7714	-1.59822		126	69.816	65.849	3.96702
		127	17.3227	16.7714	0.55131		127	70.1359	65.849	4.28683
		128	25.4062	16.7714	8.63481		128	62.6935	65.849	-3.15552
		129	13.2019	16.7714	-3.56943		129	66.5201	65.849	0.67108
		130	12.1287	16.7714	-4.64261		130	68.4295	65.849	2.5805
		131	21.1909	16.7714	4.41951		131	68.8377	65.849	2.98867
		132	9.51551	16.7714	-7.25583		132	70.2154	65.849	4.3664
		133	9.83857	16.7714	-6.93278		133	64.1989	65.849	-1.65007
		134	4.89829	16.7714	-11.8731		134	70.8095	65.849	4.96051
		135	24.3029	16.7714	7.53152		135	69.5937	65.849	3.74466
		136	22.1021	16.7714	5.33072		136	70.3862	65.849	4.53714
		137	21.1962	16.7714	4.42481		137	63.6345	65.849	-2.21449
		138	15.6883	16.7714	-1.08308		138	66.9911	65.849	1.14205
		139	19.6124	16.7714	2.84103		139	65.3629	65.849	-0.48613
		140	7.34217	16.7714	-9.42918		140	63.2476	65.849	-2.60144
		141	20.2242	16.7714	3.45285		141	63.1922	65.849	-2.6568
		142	8.02156	16.7714	-8.74979		142	62.4709	65.849	-3.37815
		143	14.4045	16.7714	-2.36686		143	64.3965	65.849	-1.45251
		144	21.5702	16.7714	4.79887		144	62.153	65.849	-3.69601
		145	20.6297	16.7714	3.85834		145	62.5299	65.849	-3.31911
		146	23.2942	16.7714	6.52286		146	62.0709	65.849	-3.77817
		147	24.3095	16.7714	7.53819		147	63.3906	65.849	-2.4584
		148	16.2838	16.7714	-0.48754		148	62.0389	65.849	-3.81009
		149	5.22241	16.7714	-11.5489		149	69.0758	65.849	3.22674
		150	18.9886	16.7714	2.21725		150	69.0352	65.849	3.18613
		151	12.3862	16.7714	-4.38514		151	65.8966	65.849	0.04755
		152	12.6498	16.7714	-4.12153		152	68.4663	65.849	2.61724
		153	18.3227	16.7714	1.55133		153	69.5329	65.849	3.68386
		154	27.3455	16.7714	10.5741		154	70.5563	65.849	4.7073
		155	10.4567	16.7714	-6.31462		155	67.2777	65.849	1.42873
		156	25.5844	16.7714	8.81309		156	67.2968	65.849	1.4478
		157	20.2223	16.7714	3.45095		157	65.8388	65.849	-0.01027
		158	22.1629	16.7714	5.39157		158	65.2236	65.849	-0.62546
		159	23.0751	16.7714	6.30373		159	64.8896	65.849	-0.95946
		160	22.4743	16.7714	5.70294		160	66.9989	65.849	1.14984
		161	19.426	16.7714	2.65462		161	65.2028	65.849	-0.64624
		162	22.123	16.7714	5.35167		162	70.4464	65.849	4.59734
		163	14.9102	16.7714	-1.86113		163	72.1787	65.849	6.32968
		164	15.1025	16.7714	-1.66881		164	71.0973	65.849	5.24832
		165	26.642	16.7714	9.87069		165	69.2138	65.849	3.36473
		166	23.5154	16.7714	6.74403		166	70.0679	65.849	4.21884
		167	15.5686	16.7714	-1.20273		167	66.2286	65.849	0.37958
		168	13.1382	16.7714	-3.63317		168	69.4962	65.849	3.64721
		169	22.9885	16.7714	6.21713		169	66.6156	65.849	0.76657
		170	25.2037	16.7714	8.43234		170	66.7833	65.849	0.93427
		171	15.6074	16.7714	-1.16399		171	67.3007	65.849	1.45166
		172	25.1177	16.7714	8.3464		172	71.0451	65.849	5.19608
		173	20.8133	16.7714	4.042		173	68.5065	65.849	2.65749
		174	18.6956	16.7714	1.92424		174	69.5072	65.849	3.65818
		175	21.2206	16.7714	4.44927		175	64.9273	65.849	-0.92176
		176	23.0428	16.7714	6.2715		176	64.1471	65.849	-1.70191
		177	21.5061	16.7714	4.73476		177	67.7749	65.849	1.92592
		178	12.0637	16.7714	-4.70769		178	67.0599	65.849	1.2109
		179	22.2575	16.7714	5.48617		179	67.2743	65.849	1.42525
		180	22.0684	16.7714	5.29706		180	63.684	65.849	-2.16497
		181	19.261	16.7714	2.48967		181	67.661	65.849	1.81194
		182	20.1591	16.7714	3.38777		182	68.2261	65.849	2.37703
		183	18.4016	16.7714	1.63023		183	73.2893	65.849	7.44027
		184	17.9828	16.7714	1.21149		184	67.0823	65.849	1.23324
		185	15.8641	16.7714	-0.90722		185	69.5098	65.849	3.66077
		186	12.8585	16.7714	-3.91286		186	70.17	65.849	4.32095
		187	22.3584	16.7714	5.58703		187	71.3022	65.849	5.45314
		188	6.76036	16.7714	-10.011		188	71.1796	65.849	5.3306
		189	17.2871	16.7714	0.51574		189	70.1322	65.849	4.28322
		190	24.4327	16.7714	7.66135		190	65.8967	65.849	0.0477
		191	26.5017	16.7714	9.73035		191	63.0525	65.849	-2.7965
		192	12.833	16.7714	-3.9384		192	65.0431	65.849	-0.80595
		193	19.4702	16.7714	2.69883		193	61.1177	65.849	-4.73134
		194	9.68708	16.7714	-7.08427		194	62.2473	65.849	-3.60171
		195	24.8529	16.7714	8.08158		195	65.4498	65.849	-0.39922
		196	11.82	16.7714	-4.95132		196	62.6778	65.849	-3.17124
		197	20.0031	16.7714	3.23176		197	65.1552	65.849	-0.69377
		198	13.5686	16.7714	-3.2027		198	59.0605	65.849	-6.78855
		199	20.1899	16.7714	3.4186		199	60.3445	65.849	-5.50448
		200	18.9227	16.7714	2.15134		200	56.4532	65.849	-9.39582
		201	10.833	16.7714	-5.93832		201	70.0526	65.849	4.20357
		202	19.3302	16.7714	2.55882		202	64.964	65.849	-0.885
		203	19.9685	16.7714	3.19715		203	64.1548	65.849	-1.69427
		204	19.463	16.7714	2.69169		204	68.3398	65.849	2.49081
		205	20.0384	16.7714	3.26707		205	62.9376	65.849	-2.91142
		206	16.0692	16.7714	-0.70217		206	57.8968	65.849	-7.95226
		207	17.9063	16.7714	1.13494		207	63.9417	65.849	-1.90733
		208	20.554	16.7714	3.78262		208	65.8956	65.849	0.04661
		209	4.91596	16.7714	-11.8554		209	72.2609	65.849	6.41183
		210	23.1062	16.7714	6.33485		210	68.3793	65.849	2.53029
		211	13.0422	16.7714	-3.72909		211	70.057	65.849	4.20799
		212	15.7093	16.7714	-1.06208		212	64.4988	65.849	-1.35026
		213	21.4046	16.7714	4.6332		213	60.5221	65.849	-5.32689
		214	22.0742	16.7714	5.30285		214	68.2144	65.849	2.36535
		215	20.5376	16.7714	3.76624		215	64.6146	65.849	-1.23446
		216	18.9966	16.7714	2.22522		216	66.5851	65.849	0.73604
		217	18.5629	16.7714	1.7916		217	64.0339	65.849	-1.81515
		218	18.2046	16.7714	1.43328		218	69.9776	65.849	4.12856
		219	9.45004	16.7714	-7.3213		219	61.9002	65.849	-3.94883
		220	13.4847	16.7714	-3.28665		220	70.925	65.849	5.07595
		221	20.7066	16.7714	3.9353		221	71.7818	65.849	5.93278
		222	20.317	16.7714	3.54568		222	67.2462	65.849	1.39715
		223	16.5866	16.7714	-0.18474		223	59.4389	65.849	-6.41011
		224	9.73494	16.7714	-7.0364		224	57.4811	65.849	-8.36795
		225	13.0569	16.7714	-3.71445		225	66.4855	65.849	0.63647
		226	14.5965	16.7714	-2.17489		226	67.8378	65.849	1.98876
		227	22.8487	16.7714	6.07732		227	63.8505	65.849	-1.99851
		228	21.4103	16.7714	4.63899		228	62.0246	65.849	-3.82446
		229	18.8746	16.7714	2.10327		229	63.8746	65.849	-1.9744
		230	21.2489	16.7714	4.47751		230	68.8722	65.849	3.02317
		231	24.3789	16.7714	7.60756		231	62.3498	65.849	-3.49924
		232	19.4604	16.7714	2.68909		232	62.139	65.849	-3.71002
		233	19.0694	16.7714	2.2981		233	62.9652	65.849	-2.8838
		234	22.7693	16.7714	5.99799		234	72.2348	65.849	6.38583
		235	17.5788	16.7714	0.80747		235	67.3776	65.849	1.52855
		236	18.5203	16.7714	1.7489		236	70.3261	65.849	4.47708
		237	26.0678	16.7714	9.2964		237	70.2241	65.849	4.37512
		238	20.3512	16.7714	3.57984		238	74.6565	65.849	8.80747
		239	23.1215	16.7714	6.3502		239	71.5558	65.849	5.7068
		240	30.036	16.7714	13.2647		240	69.5968	65.849	3.74773
		241	22.2971	16.7714	5.52578		241	71.5257	65.849	5.6767
		242	9.83581	16.7714	-6.93553		242	73.2545	65.849	7.40543
		243	22.2822	16.7714	5.51089		243	70.8234	65.849	4.97441
		244	8.82184	16.7714	-7.94951		244	66.2507	65.849	0.40165
		245	18.7896	16.7714	2.01828		245	71.6397	65.849	5.79071
		246	20.7295	16.7714	3.95817		246	62.4663	65.849	-3.38277
		247	25.7696	16.7714	8.99824		247	64.4101	65.849	-1.43895
		248	24.0159	16.7714	7.24451		248	68.6692	65.849	2.8202
		249	22.8662	16.7714	6.09489		249	71.3327	65.849	5.4837
		250	17.735	16.7714	0.9637		250	68.4594	65.849	2.6104
		251	9.13248	16.7714	-7.63887		251	67.041	65.849	1.19197
		252	22.4088	16.7714	5.6375		252	66.1131	65.849	0.26411
		253	13.4218	16.7714	-3.34953		253	69.6139	65.849	3.7649
		254	19.3213	16.7714	2.54999		254	68.338	65.849	2.48895
		255	11.9997	16.7714	-4.77163		255	70.0449	65.849	4.1959
		256	6.5611	16.7714	-10.2103		256	61.9876	65.849	-3.86138
		257	15.6529	16.7714	-1.11844		257	67.9253	65.849	2.07633
		258	11.8756	16.7714	-4.89576		258	69.6493	65.849	3.80023
		259	9.5271	16.7714	-7.24425		259	70.7328	65.849	4.88376
		260	19.493	16.7714	2.72168		260	71.795	65.849	5.94597
		261	22.9559	16.7714	6.18459		261	71.5908	65.849	5.74176
		262	7.79413	16.7714	-8.97721		262	69.0864	65.849	3.23743
		263	14.5009	16.7714	-2.27048		263	53.7981	65.849	-12.0509
		264	13.3287	16.7714	-3.44267		264	70.6597	65.849	4.81065
		265	12.6544	16.7714	-4.11691		265	72.6697	65.849	6.82064
		266	23.2014	16.7714	6.43004		266	70.256	65.849	4.40694
		267	20.2191	16.7714	3.44775		267	71.9293	65.849	6.08026
		268	10.9953	16.7714	-5.77608		268	65.5401	65.849	-0.30891
		269	21.1843	16.7714	4.41291		269	67.3458	65.849	1.49674
		270	12.9197	16.7714	-3.85167		270	69.7727	65.849	3.92364
		271	14.718	16.7714	-2.05332		271	70.6955	65.849	4.84645
		272	19.8227	16.7714	3.05136		272	66.2426	65.849	0.39356
		273	21.6385	16.7714	4.86715		273	69.174	65.849	3.32495
		274	8.3234	16.7714	-8.44795		274	63.1888	65.849	-2.66025
		275	29.0989	16.7714	12.3275		275	62.3101	65.849	-3.53893
		276	12.1448	16.7714	-4.62656		276	70.5563	65.849	4.7073
		277	16.9472	16.7714	0.17583		277	63.4753	65.849	-2.3737
		278	14.2364	16.7714	-2.53496		278	68.4314	65.849	2.58239
		279	19.9932	16.7714	3.22186		279	63.2758	65.849	-2.57318
		280	5.58656	16.7714	-11.1848		280	62.4296	65.849	-3.41943
		281	17.6063	16.7714	0.83493		281	61.9697	65.849	-3.87936
		282	10.9946	16.7714	-5.77677		282	65.3159	65.849	-0.53315
		283	17.8165	16.7714	1.04513		283	56.7237	65.849	-9.12535
		284	16.0241	16.7714	-0.74724		284	70.0615	65.849	4.21249
		285	19.8546	16.7714	3.08325		285	68.0243	65.849	2.17525
		286	7.77613	16.7714	-8.99521		286	69.5694	65.849	3.72033
		287	13.9603	16.7714	-2.81109		287	70.1747	65.849	4.32568
		288	16.7425	16.7714	-0.02883		288	69.6584	65.849	3.80939
		289	22.2675	16.7714	5.49613		289	64.3165	65.849	-1.5325
		290	3.11359	16.7714	-13.6578		290	63.0655	65.849	-2.78352
		291	19.9441	16.7714	3.17272		291	65.9709	65.849	0.12189
		292	8.38582	16.7714	-8.38552		292	72.3901	65.849	6.54105
		293	9.55109	16.7714	-7.22026		293	71.7938	65.849	5.9448
		294	8.59187	16.7714	-8.17947		294	71.3203	65.849	5.47132
		295	19.4025	16.7714	2.63118		295	70.0116	65.849	4.16257
		296	19.2005	16.7714	2.42913		296	72.9806	65.849	7.13154
		297	6.07037	16.7714	-10.701		297	59.1188	65.849	-6.73025
		298	19.2903	16.7714	2.51894		298	61.0282	65.849	-4.82082
		299	15.0941	16.7714	-1.67725		299	63.4221	65.849	-2.42691
		300	15.0564	16.7714	-1.71495		300	68.8796	65.849	3.03057
		301	4.16091	16.7714	-12.6104		301	61.0397	65.849	-4.80929
		302	17.9796	16.7714	1.20822		302	61.2872	65.849	-4.56184
		303	12.6146	16.7714	-4.15672		303	71.4272	65.849	5.57822
		304	2.39707	16.7714	-14.3743		304	69.4996	65.849	3.65057
		305	19.6435	16.7714	2.87218		305	62.1666	65.849	-3.68239
		306	9.70267	16.7714	-7.06868		306	71.2369	65.849	5.38789
		307	2.35619	16.7714	-14.4152		307	73.1998	65.849	7.35081
		308	16.5394	16.7714	-0.23197		308	62.0904	65.849	-3.75861
		309	26.8098	16.7714	10.0384		309	65.4288	65.849	-0.42023
		310	19.8837	16.7714	3.11232		310	69.183	65.849	3.33401
		311	18.225	16.7714	1.45366		311	62.848	65.849	-3.00106
		312	19.9509	16.7714	3.17955		312	63.8329	65.849	-2.01607
		313	19.2253	16.7714	2.45395		313	70.2272	65.849	4.37823
		314	16.2476	16.7714	-0.52374		314	63.449	65.849	-2.40006
		315	4.7502	16.7714	-12.0212		315	65.2499	65.849	-0.59912
		316	26.0166	16.7714	9.24521		316	72.73	65.849	6.88097
		317	13.5482	16.7714	-3.22318		317	74.6028	65.849	8.75373
		318	7.59563	16.7714	-9.17572		318	68.8843	65.849	3.03531
		319	7.8953	16.7714	-8.87605		319	68.7411	65.849	2.89205
		320	8.80924	16.7714	-7.96211		320	69.3194	65.849	3.4704
		321	16.6079	16.7714	-0.16343		321	62.2412	65.849	-3.60778
		322	12.5797	16.7714	-4.19164		322	68.9345	65.849	3.08546
		323	21.0788	16.7714	4.30742		323	70.4769	65.849	4.62789
		324	17.5338	16.7714	0.76243		324	65.6617	65.849	-0.18731
		325	17.9771	16.7714	1.20572		325	58.8945	65.849	-6.95455
		326	23.4241	16.7714	6.65272		326	70.3955	65.849	4.54652
		327	24.7969	16.7714	8.02555		327	72.3625	65.849	6.51352
		328	11.5122	16.7714	-5.25918		328	70.4349	65.849	4.58584
		329	12.4798	16.7714	-4.29155		329	72.2972	65.849	6.44815
		330	12.4225	16.7714	-4.34885		330	70.4318	65.849	4.5828
		331	5.66687	16.7714	-11.1045		331	60.8428	65.849	-5.00623
		332	23.3297	16.7714	6.55831		332	63.4978	65.849	-2.35127
		333	24.9977	16.7714	8.22633		333	71.1692	65.849	5.32019
		334	3.85963	16.7714	-12.9117		334	68.3398	65.849	2.49083
		335	8.7549	16.7714	-8.01644		335	65.0112	65.849	-0.83783
		336	7.72096	16.7714	-9.05039		336	58.8383	65.849	-7.01073
		337	8.41073	16.7714	-8.36061		337	69.1218	65.849	3.27279
		338	23.4042	16.7714	6.63288		338	59.6174	65.849	-6.23162
		339	0.90453	16.7714	-15.8668		339	69.5481	65.849	3.69909
		340	14.7066	16.7714	-2.06473		340	65.4247	65.849	-0.42433
		341	21.5556	16.7714	4.7843		341	70.4002	65.849	4.55116
		342	22.5537	16.7714	5.78234		342	70.8414	65.849	4.99236
		343	16.5543	16.7714	-0.21701		343	64.4359	65.849	-1.41314
		344	19.7685	16.7714	2.99714		344	64.82	65.849	-1.02898
		345	5.84069	16.7714	-10.9307		345	70.1998	65.849	4.3508
		346	18.208	16.7714	1.43665		346	65.2501	65.849	-0.59891
		347	6.2941	16.7714	-10.4772		347	68.8663	65.849	3.0173
		348	11.7219	16.7714	-5.04943		348	69.8915	65.849	4.04252
		349	17.8164	16.7714	1.04502		349	69.5189	65.849	3.66992
		350	18.0945	16.7714	1.32318		350	68.0247	65.849	2.17573
		351	13.1266	16.7714	-3.64475		351	65.8676	65.849	0.01856
		352	12.4584	16.7714	-4.31289		352	67.2426	65.849	1.3936
		353	9.28944	16.7714	-7.4819		353	70.6583	65.849	4.80929
		354	12.1845	16.7714	-4.58681		354	71.368	65.849	5.519
		355	17.2391	16.7714	0.46772		355	69.3923	65.849	3.54322
		356	8.51924	16.7714	-8.2521		356	60.6828	65.849	-5.16626
		357	14.8327	16.7714	-1.93862		357	67.8293	65.849	1.98024
		358	14.8139	16.7714	-1.95748		358	59.9164	65.849	-5.93264
		359	21.1526	16.7714	4.38122		359	66.4327	65.849	0.58369
		360	20.8253	16.7714	4.05393		360	68.3447	65.849	2.4957
		361	17.1319	16.7714	0.36057		361	69.7479	65.849	3.89886
		362	9.98078	16.7714	-6.79057		362	68.6738	65.849	2.82474
		363	22.3343	16.7714	5.56297		363	65.1043	65.849	-0.74468
		364	18.4498	16.7714	1.67842		364	67.3972	65.849	1.54817
		365	17.694	16.7714	0.92263		365	59.2809	65.849	-6.56812
		366	23.3619	16.7714	6.59053		366	66.9621	65.849	1.11313
		367	19.9221	16.7714	3.15075		367	72.0952	65.849	6.24617
		368	12.9684	16.7714	-3.80292		368	71.5885	65.849	5.73948
		369	13.6443	16.7714	-3.12702		369	70.8416	65.849	4.99257
		370	13.793	16.7714	-2.97836		370	69.6102	65.849	3.76114
		371	16.1811	16.7714	-0.59027		371	70.3128	65.849	4.46382
		372	23.8687	16.7714	7.09734		372	67.2076	65.849	1.35862
		373	3.3147	16.7714	-13.4566		373	72.3447	65.849	6.49568
		374	18.6754	16.7714	1.9041		374	72.111	65.849	6.26194
		375	15.7638	16.7714	-1.00758		375	68.8975	65.849	3.04851
		376	20.092	16.7714	3.32062		376	64.1912	65.849	-1.65781
		377	22.7868	16.7714	6.01549		377	71.4658	65.849	5.61676
		378	5.89467	16.7714	-10.8767		378	66.974	65.849	1.12502
		379	23.3235	16.7714	6.55215		379	67.8663	65.849	2.01724
		380	12.0433	16.7714	-4.72804		380	71.1816	65.849	5.33261
		381	18.4653	16.7714	1.69399		381	72.3319	65.849	6.48283
		382	21.8368	16.7714	5.06541		382	73.8934	65.849	8.04434
		383	19.1822	16.7714	2.41082		383	68.7995	65.849	2.95052
		384	17.5156	16.7714	0.74421		384	69.2068	65.849	3.35777
		385	22.5668	16.7714	5.79541		385	72.0431	65.849	6.19407
		386	5.82642	16.7714	-10.9449		386	71.0723	65.849	5.22326
		387	10.8737	16.7714	-5.89768		387	67.7598	65.849	1.91079
		388	19.2108	16.7714	2.43941		388	69.0096	65.849	3.16063
		389	15.3015	16.7714	-1.46987		389	62.8395	65.849	-3.00948
		390	18.2076	16.7714	1.43623		390	70.5737	65.849	4.7247
		391	22.5125	16.7714	5.74113		391	69.5386	65.849	3.6896
		392	12.6185	16.7714	-4.15288		392	58.7293	65.849	-7.1197
		393	9.18578	16.7714	-7.58557		393	61.2836	65.849	-4.56541
		394	10.4609	16.7714	-6.31041		394	69.1745	65.849	3.32544
		395	26.0669	16.7714	9.29555		395	73.1124	65.849	7.26342
		396	12.6516	16.7714	-4.11973		396	70.0287	65.849	4.17964
		397	19.5188	16.7714	2.74746		397	64.9527	65.849	-0.89629
		398	17.957	16.7714	1.18563		398	59.5872	65.849	-6.26181
		399	17.3182	16.7714	0.54688		399	59.0396	65.849	-6.80941
		400	15.0307	16.7714	-1.74067		400	62.4478	65.849	-3.4012
		401	8.18686	16.7714	-8.58448		401	72.919	65.849	7.06998
		402	17.657	16.7714	0.88565		402	72.1085	65.849	6.25948
		403	14.4611	16.7714	-2.3102		403	71.0217	65.849	5.17265
		404	4.64671	16.7714	-12.1246		404	63.6899	65.849	-2.15909
		405	20.1888	16.7714	3.41745		405	73.3807	65.849	7.53171
		406	20.8211	16.7714	4.04974		406	73.7218	65.849	7.87281
		407	1.95709	16.7714	-14.8143		407	64.9798	65.849	-0.86926
		408	23.2159	16.7714	6.44456		408	69.3912	65.849	3.54216
		409	23.3562	16.7714	6.58487		409	61.1564	65.849	-4.69257
		410	11.79	16.7714	-4.98132		410	71.4709	65.849	5.62183
		411	19.8806	16.7714	3.10928		411	70.9291	65.849	5.08004
		412	4.54526	16.7714	-12.2261		412	69.2662	65.849	3.41718
		413	17.5031	16.7714	0.73179		413	71.5636	65.849	5.71458
		414	18.6147	16.7714	1.84331		414	67.4331	65.849	1.58412
		415	12.3919	16.7714	-4.37939		415	66.3745	65.849	0.52545
		416	4.87392	16.7714	-11.8974		416	68.0377	65.849	2.18867
		417	14.6933	16.7714	-2.07804		417	68.8879	65.849	3.03892
		418	16.3758	16.7714	-0.39559		418	66.1258	65.849	0.27681
		419	11.8607	16.7714	-4.9106		419	67.1003	65.849	1.25129
		420	20.9345	16.7714	4.16319		420	63.2979	65.849	-2.55111
		421	21.8637	16.7714	5.09238		421	66.0003	65.849	0.15131
		422	21.2234	16.7714	4.45206		422	67.8982	65.849	2.04922
		423	12.8408	16.7714	-3.93058		423	70.1895	65.849	4.34045
		424	16.6349	16.7714	-0.13647		424	71.5095	65.849	5.6605
		425	17.5023	16.7714	0.73099		425	65.8024	65.849	-0.04663
		426	19.5263	16.7714	2.75495		426	68.4971	65.849	2.64807
		427	15.6823	16.7714	-1.08908		427	70.8405	65.849	4.99147
		428	15.5333	16.7714	-1.23805		428	67.3937	65.849	1.54471
		429	13.4066	16.7714	-3.36475		429	68.9252	65.849	3.07614
		430	15.922	16.7714	-0.84933		430	72.2254	65.849	6.37643
		431	5.17445	16.7714	-11.5969		431	72.7543	65.849	6.90528
		432	15.4709	16.7714	-1.30049		432	72.7589	65.849	6.90986
		433	8.55495	16.7714	-8.21639		433	65.5979	65.849	-0.2511
		434	7.38224	16.7714	-9.38911		434	67.327	65.849	1.47796
		435	18.8989	16.7714	2.12753		435	64.0648	65.849	-1.78427
		436	18.8016	16.7714	2.03028		436	59.6642	65.849	-6.18485
		437	15.0627	16.7714	-1.70866		437	62.1294	65.849	-3.71966
		438	14.3111	16.7714	-2.46025		438	67.4484	65.849	1.59942
		439	20.8416	16.7714	4.07029		439	65.7975	65.849	-0.05148
		440	18.613	16.7714	1.84162		440	70.0932	65.849	4.24415
		441	14.3553	16.7714	-2.41601		441	67.1167	65.849	1.26769
		442	15.6306	16.7714	-1.14071		442	69.4886	65.849	3.63956
		443	17.4344	16.7714	0.66301		443	67.035	65.849	1.18595
		444	16.1545	16.7714	-0.61683		444	68.2392	65.849	2.39014
		445	20.1681	16.7714	3.39676		445	66.0705	65.849	0.2215
		446	7.29732	16.7714	-9.47402		446	68.7448	65.849	2.89578
		447	7.18145	16.7714	-9.58989		447	60.308	65.849	-5.54105
		448	9.39852	16.7714	-7.37283		448	67.8363	65.849	1.98731
		449	20.9547	16.7714	4.18332		449	68.1438	65.849	2.29475
		450	20.0922	16.7714	3.32085		450	70.6232	65.849	4.77416
		451	14.6706	16.7714	-2.10079		451	70.4064	65.849	4.55739
		452	15.9463	16.7714	-0.825		452	70.8288	65.849	4.97977
		453	21.7409	16.7714	4.96952		453	71.1684	65.849	5.31941
		454	17.1354	16.7714	0.36405		454	68.2456	65.849	2.39661
		455	3.44371	16.7714	-13.3276		455	67.6409	65.849	1.79184
		456	8.86646	16.7714	-7.90489		456	63.6847	65.849	-2.16434
		457	20.1716	16.7714	3.40028		457	59.6529	65.849	-6.19611
		458	22.5358	16.7714	5.76443		458	69.0666	65.849	3.21758
		459	22.322	16.7714	5.55066		459	65.5297	65.849	-0.3193
		460	15.9639	16.7714	-0.80748		460	62.4097	65.849	-3.43934
		461	22.0696	16.7714	5.29831		461	67.5941	65.849	1.74505
		462	19.6723	16.7714	2.90096		462	62.5636	65.849	-3.28539
		463	13.9235	16.7714	-2.84789		463	63.15	65.849	-2.69899
		464	5.27744	16.7714	-11.4939		464	66.1179	65.849	0.2689
		465	14.7102	16.7714	-2.06114		465	68.7595	65.849	2.91046
		466	14.6012	16.7714	-2.17012		466	65.5733	65.849	-0.27573
		467	8.31467	16.7714	-8.45668		467	65.5957	65.849	-0.25332
		468	16.0796	16.7714	-0.6918		468	68.1817	65.849	2.33272
		469	23.5754	16.7714	6.80403		469	66.1025	65.849	0.25351
		470	6.14291	16.7714	-10.6284		470	64.4005	65.849	-1.4485
		471	23.6695	16.7714	6.89812		471	64.1723	65.849	-1.67674
		472	11.2609	16.7714	-5.5104		472	66.3555	65.849	0.5065
		473	22.2683	16.7714	5.49694		473	66.7149	65.849	0.86584
		474	13.7341	16.7714	-3.03721		474	64.1624	65.849	-1.6866
		475	3.192	16.7714	-13.5793		475	64.6139	65.849	-1.23513
		476	9.7641	16.7714	-7.00725		476	70.1786	65.849	4.32955
		477	24.77	16.7714	7.99864		477	60.5038	65.849	-5.34517
		478	24.1694	16.7714	7.39808		478	67.2405	65.849	1.3915
		479	19.9191	16.7714	3.14774		479	69.3483	65.849	3.49928
		480	10.5605	16.7714	-6.21082		480	60.7431	65.849	-5.10593
		481	9.60347	16.7714	-7.16787		481	66.619	65.849	0.76999
		482	7.68842	16.7714	-9.08293		482	65.5928	65.849	-0.25619
		483	10.6576	16.7714	-6.11371		483	65.4478	65.849	-0.4012
		484	11.4581	16.7714	-5.31324		484	60.4599	65.849	-5.38907
		485	13.0931	16.7714	-3.67819		485	71.7226	65.849	5.87355
		486	19.42	16.7714	2.64869		486	65.4278	65.849	-0.42121
		487	10.7548	16.7714	-6.01656		487	70.7213	65.849	4.87231
		488	18.2036	16.7714	1.43229		488	70.2414	65.849	4.39234
		489	3.71435	16.7714	-13.057		489	69.2227	65.849	3.37368
		490	15.2443	16.7714	-1.52708		490	65.5465	65.849	-0.30252
		491	17.1002	16.7714	0.32886		491	70.9773	65.849	5.1283
		492	20.4689	16.7714	3.6976		492	61.4946	65.849	-4.35439
		493	9.73135	16.7714	-7.04		493	69.1227	65.849	3.27369
		494	10.4451	16.7714	-6.3263		494	60.9783	65.849	-4.87069
		495	23.3918	16.7714	6.62047		495	63.0748	65.849	-2.77419
		496	9.51559	16.7714	-7.25576		496	64.6383	65.849	-1.21073
		497	14.481	16.7714	-2.2903		497	67.1184	65.849	1.26941
		498	20.5544	16.7714	3.78306		498	66.2996	65.849	0.45054
		499	16.5875	16.7714	-0.18386		499	72.3379	65.849	6.48886
		500	22.5416	16.7714	5.77027		500	67.9493	65.849	2.10025
		501	11.211	16.7714	-5.56036		501	70.1542	65.849	4.3052
		502	18.3332	16.7714	1.56189		502	72.0598	65.849	6.21076
		503	16.0602	16.7714	-0.71119		503	73.6413	65.849	7.79229
		504	21.3703	16.7714	4.59895		504	64.2889	65.849	-1.56009
		505	17.7467	16.7714	0.97533		505	70.257	65.849	4.40793
		506	21.182	16.7714	4.41068		506	68.4904	65.849	2.64134
		507	16.7878	16.7714	0.01647		507	60.9777	65.849	-4.8713
		508	16.8558	16.7714	0.08443		508	58.9683	65.849	-6.88074
		509	15.7583	16.7714	-1.01306		509	70.811	65.849	4.96196
		510	25.0365	16.7714	8.26511		510	71.0585	65.849	5.20946
		511	19.8249	16.7714	3.05355		511	69.2125	65.849	3.36344
		512	20.6329	16.7714	3.86151		512	70.1358	65.849	4.28676
		513	3.49866	16.7714	-13.2727		513	67.7801	65.849	1.93108
		514	27.2953	16.7714	10.524		514	61.1795	65.849	-4.66954
		515	23.8448	16.7714	7.07349		515	67.9168	65.849	2.06779
		516	24.1036	16.7714	7.33224		516	60.547	65.849	-5.30203
		517	8.03622	16.7714	-8.73513		517	65.9269	65.849	0.07789
		518	18.0247	16.7714	1.25334		518	63.6174	65.849	-2.23159
		519	18.1341	16.7714	1.36279		519	62.6392	65.849	-3.20985
		520	17.3379	16.7714	0.5666		520	67.4029	65.849	1.55388
		521	13.5818	16.7714	-3.18953		521	67.699	65.849	1.85002
		522	19.4728	16.7714	2.70149		522	71.3018	65.849	5.45277
		523	12.6027	16.7714	-4.1687		523	67.8712	65.849	2.02213
		524	16.6385	16.7714	-0.13283		524	69.4515	65.849	3.60244
		525	19.99	16.7714	3.21863		525	61.224	65.849	-4.625
		526	19.4994	16.7714	2.7281		526	60.0793	65.849	-5.76973
		527	22.1992	16.7714	5.42784		527	64.3481	65.849	-1.50095
		528	16.5833	16.7714	-0.18803		528	58.7285	65.849	-7.12052
		529	21.3722	16.7714	4.60083		529	71.1914	65.849	5.34242
		530	16.5963	16.7714	-0.17503		530	67.1618	65.849	1.31279
		531	20.88	16.7714	4.10868		531	63.7813	65.849	-2.0677
		532	22.7881	16.7714	6.0168		532	71.3448	65.849	5.49573
		533	13.3288	16.7714	-3.44258		533	70.2638	65.849	4.41482
		534	17.323	16.7714	0.5517		534	72.1759	65.849	6.32685
		535	20.371	16.7714	3.59963		535	68.4569	65.849	2.60786
		536	16.8466	16.7714	0.07529		536	72.0118	65.849	6.16279
		537	13.0652	16.7714	-3.70614		537	58.4815	65.849	-7.36749
		538	10.9753	16.7714	-5.79609		538	63.8691	65.849	-1.9799
		539	24.8438	16.7714	8.07245		539	58.0719	65.849	-7.77713
		540	14.7821	16.7714	-1.98923		540	56.7984	65.849	-9.0506
		541	21.1804	16.7714	4.40903		541	71.2248	65.849	5.37576
		542	18.1804	16.7714	1.40901		542	68.7924	65.849	2.94338
		543	4.26793	16.7714	-12.5034		543	63.9615	65.849	-1.88749
		544	12.0721	16.7714	-4.69928		544	63.4733	65.849	-2.3757
		545	9.79918	16.7714	-6.97216		545	68.2334	65.849	2.38438
		546	10.2132	16.7714	-6.55815		546	69.4184	65.849	3.56937
		547	13.4064	16.7714	-3.36494		547	71.5095	65.849	5.6605
		548	20.7427	16.7714	3.97136		548	70.0287	65.849	4.17971
		549	19.5962	16.7714	2.82484		549	69.2706	65.849	3.42155
		550	17.9646	16.7714	1.19326		550	69.7682	65.849	3.91919
		551	20.1365	16.7714	3.36514		551	60.4376	65.849	-5.41147
		552	7.39074	16.7714	-9.38061		552	65.7667	65.849	-0.08229
		553	18.1756	16.7714	1.40421		553	68.2345	65.849	2.38548
		554	19.9579	16.7714	3.18651		554	70.258	65.849	4.40901
		555	21.5895	16.7714	4.81812		555	73.2476	65.849	7.39859
		556	11.7412	16.7714	-5.03019		556	71.702	65.849	5.85302
		557	6.66996	16.7714	-10.1014		557	70.2929	65.849	4.44385
		558	22.7984	16.7714	6.02711		558	59.9334	65.849	-5.91563
		559	19.0366	16.7714	2.26523		559	66.1368	65.849	0.2878
		560	17.6799	16.7714	0.9086		560	66.5887	65.849	0.73972
		561	6.71981	16.7714	-10.0515		561	60.3122	65.849	-5.53682
		562	20.6032	16.7714	3.83181		562	61.7919	65.849	-4.05714
		563	11.8541	16.7714	-4.91726		563	55.6575	65.849	-10.1916
		564	17.6028	16.7714	0.83147		564	57.5797	65.849	-8.26934
		565	14.3904	16.7714	-2.38091		565	60.4922	65.849	-5.35686
		566	13.7088	16.7714	-3.06256		566	67.6966	65.849	1.84758
		567	17.0972	16.7714	0.32582		567	68.0624	65.849	2.21335
		568	20.9913	16.7714	4.21993		568	68.4378	65.849	2.58877
		569	9.48186	16.7714	-7.28949		569	65.8365	65.849	-0.0125
		570	15.7547	16.7714	-1.01666		570	60.2133	55.0513	5.16196
		571	20.7634	16.7714	3.99203		571	58.388	55.0513	3.3367
		572	21.0551	16.7714	4.28377		572	58.8488	55.0513	3.79748
		573	20.4445	16.7714	3.67315		573	54.2105	55.0513	-0.84075
		574	8.27494	16.7714	-8.4964		574	58.0414	55.0513	2.99009
		575	16.9281	16.7714	0.15676		575	54.7165	55.0513	-0.33485
		576	13.541	16.7714	-3.23037		576	55.3555	55.0513	0.30421
		577	21.5424	16.7714	4.77106		577	61.224	55.0513	6.17272
		578	20.8783	16.7714	4.1069		578	56.5638	55.0513	1.51252
		579	18.5429	16.7714	1.7716		579	62.7737	65.849	-3.07535
		580	20.9282	16.7714	4.15684		580	59.1816	65.849	-6.66745
		581	12.9526	16.7714	-3.81874		581	60.7193	65.849	-5.12969
		582	23.5971	16.7714	6.82574		582	68.2321	65.849	2.38305
		583	19.4119	16.7714	2.64057		583	71.2287	65.849	5.3797
		584	3.02484	16.7714	-13.7465		584	68.3984	65.849	2.5494
		585	17.0468	16.7714	0.27549		585	63.9346	65.849	-1.9144
		586	15.5815	16.7714	-1.18984		586	70.4219	65.849	4.57285
		587	18.3595	16.7714	1.58815		587	63.4689	65.849	-2.38013
		588	17.7921	16.7714	1.0208		588	63.4159	65.849	-2.43308
		589	14.4873	16.7714	-2.28401		589	64.269	65.849	-1.58004
		590	5.58418	16.7714	-11.1872		590	68.7812	65.849	2.93218
		591	17.1653	16.7714	0.39398		591	68.2815	65.849	2.43252
		592	15.6743	16.7714	-1.09705		592	68.0368	65.849	2.18775
		593	15.502	16.7714	-1.26937		593	60.6282	65.849	-5.22082
		594	16.9283	16.7714	0.15695		594	62.4348	65.849	-3.41427
		595	21.9656	16.7714	5.19429		595	65.6249	65.849	-0.22407
		596	16.6493	16.7714	-0.12208		596	66.9776	65.849	1.12861
		597	8.40323	16.7714	-8.36811		597	69.7986	65.849	3.94954
		598	19.4344	16.7714	2.66309		598	65.3581	65.849	-0.49098
		599	16.6404	16.7714	-0.13094		599	65.384	65.849	-0.46498
		600	16.1679	16.7714	-0.60346		600	72.1015	65.849	6.25248
		601	12.0013	16.7714	-4.77005		601	73.2912	65.849	7.44216
		602	22.3307	16.7714	5.5594		602	74.2863	65.849	8.43726
		603	17.3342	16.7714	0.56282		603	69.846	65.849	3.99702
		604	7.41503	16.7714	-9.35631		604	65.1898	65.849	-0.65926
		605	22.4228	16.7714	5.6515		605	61.8793	65.849	-3.96969
		606	20.8392	16.7714	4.06782		606	69.8958	65.849	4.0468
		607	17.0021	16.7714	0.23073		607	72.6787	65.849	6.82966
		608	13.8774	16.7714	-2.89396		608	70.4385	65.849	4.5895
		609	14.2608	16.7714	-2.51054		609	68.6171	65.849	2.7681
		610	14.7194	16.7714	-2.05191		610	65.5762	65.849	-0.2728
		611	8.94898	16.7714	-7.82237		611	72.9729	65.849	7.12393
		612	20.8062	16.7714	4.03491		612	69.3256	65.849	3.47654
		613	15.4705	16.7714	-1.30082		613	68.2131	65.849	2.36412
		614	16.9698	16.7714	0.1984		614	72.0331	65.849	6.18403
		615	16.5169	16.7714	-0.25444		615	68.08	65.849	2.23094
		616	15.0973	16.7714	-1.67407		616	74.4074	65.849	8.55843
		617	2.33641	16.7714	-14.4349		617	67.2511	65.849	1.40206
		618	21.5367	16.7714	4.76533		618	66.4571	65.849	0.60809
		619	21.3253	16.7714	4.55395		619	70.8246	65.849	4.9756
		620	19.3311	16.7714	2.55979		620	73.5896	65.849	7.74053
		621	13.561	16.7714	-3.21038		621	69.6296	65.849	3.7806
		622	14.8892	16.7714	-1.88213		622	72.6464	65.849	6.79736
		623	13.0858	16.7714	-3.68559		623	74.3838	65.849	8.53475
		624	1.92288	16.7714	-14.8485		624	64.7366	65.849	-1.11241
		625	20.4123	16.7714	3.64098		625	59.2692	65.849	-6.5798
		626	0.79698	16.7714	-15.9744		626	58.3172	65.849	-7.53186
		627	9.61798	16.7714	-7.15337		627	65.7195	65.849	-0.12951
		628	19.7553	16.7714	2.98397		628	64.9975	65.849	-0.85151
		629	15.3069	16.7714	-1.46447		629	67.1043	65.849	1.25524
		630	16.5947	16.7714	-0.17666		630	64.1323	65.849	-1.71671
		631	13.2021	16.7714	-3.5692		631	68.2046	65.849	2.35556
		632	19.4078	16.7714	2.63641		632	69.0815	65.849	3.23247
		633	22.0267	16.7714	5.25536		633	62.475	65.849	-3.37406
		634	23.4411	16.7714	6.66977		634	66.7456	65.849	0.89656
		635	16.335	16.7714	-0.43631		635	69.9893	65.849	4.14027
		636	18.9607	16.7714	2.18938		636	68.6838	65.849	2.83478
		637	19.3163	16.7714	2.54493		637	71.5003	65.849	5.65126
		638	14.6391	16.7714	-2.13229		638	73.6011	65.849	7.75211
		639	18.6328	16.7714	1.86144		639	69.8072	65.849	3.9582
		640	11.7385	16.7714	-5.0328		640	76.3317	65.849	10.4827
		641	15.6484	16.7714	-1.12293		641	67.7533	65.849	1.90425
		642	14.5895	16.7714	-2.18189		642	70.0448	65.849	4.19574
		643	24.0193	16.7714	7.24801		643	67.4285	65.849	1.57952
		644	19.8805	16.7714	3.10912		644	70.8841	65.849	5.03503
		645	18.9929	16.7714	2.22158		645	67.4266	65.849	1.57761
		646	25.7897	16.7714	9.01835		646	70.8183	65.849	4.96929
		647	16.1322	16.7714	-0.63915		647	66.7666	65.849	0.91754
		648	17.8378	16.7714	1.06647		648	71.8902	65.849	6.04119
		649	23.3353	16.7714	6.564		649	71.5985	65.849	5.74944
		650	24.9111	16.7714	8.13976		650	67.0057	65.849	1.15663
		651	9.10398	16.7714	-7.66737		651	73.1182	65.849	7.26918
		652	13.259	16.7714	-3.51235		652	70.1957	65.849	4.34668
		653	5.26425	16.7714	-11.5071		653	74.157	65.849	8.30795
		654	18.1206	16.7714	1.34924		654	73.1263	65.849	7.27728
		655	19.0389	16.7714	2.26753		655	68.0646	65.849	2.21554
		656	9.31137	16.7714	-7.45997		656	72.6786	65.849	6.82961
		657	10.8668	16.7714	-5.90449		657	72.9086	65.849	7.05954
		658	3.98243	16.7714	-12.7889		658	68.8218	65.849	2.97278
		659	22.5011	16.7714	5.72972		659	66.6271	65.849	0.77805
		660	13.9736	16.7714	-2.79774		660	71.8084	65.849	5.95933
		661	21.0867	16.7714	4.31541		661	70.3965	65.849	4.54751
		662	15.6705	16.7714	-1.10085		662	65.3667	65.849	-0.48231
		663	22.4828	16.7714	5.71145		663	68.7471	65.849	2.89809
		664	11.3134	16.7714	-5.45794		664	68.7743	65.849	2.92531
		665	19.1943	16.7714	2.42291		665	66.6895	65.849	0.84047
		666	18.7454	16.7714	1.97401		666	73.3265	65.849	7.47752
		667	14.9236	16.7714	-1.84775		667	71.5109	65.849	5.66184
		668	5.6355	16.7714	-11.1358		668	73.6333	65.849	7.78423
		669	23.3191	16.7714	6.54775		669	69.1146	65.849	3.26561
		670	15.138	16.7714	-1.63329		670	69.9462	65.849	4.09722
		671	17.3685	16.7714	0.5972		671	70.6182	65.849	4.76919
		672	5.38031	16.7714	-11.391		672	72.8472	65.849	6.99817
		673	17.4025	16.7714	0.63119		673	67.6504	65.849	1.8014
		674	17.7541	16.7714	0.98272		674	70.8835	65.849	5.03453
		675	18.5604	16.7714	1.78903		675	69.2593	65.849	3.41026
		676	16.2974	16.7714	-0.47397		676	70.4949	65.849	4.64586
		677	14.992	16.7714	-1.77936		677	69.9905	65.849	4.14147
		678	15.0718	16.7714	-1.69949		678	71.7555	65.849	5.90649
		679	20.7141	16.7714	3.94275		679	72.4989	65.849	6.64991
		680	20.8915	16.7714	4.12019		680	72.4442	65.849	6.59516
		681	21.6858	16.7714	4.91446		681	73.8681	65.849	8.0191
		682	16.654	16.7714	-0.11737		682	71.8094	65.849	5.9604
		683	16.8027	16.7714	0.03136		683	68.4462	65.849	2.59718
		684	5.65925	16.7714	-11.1121		684	72.4897	65.849	6.64065
		685	17.3291	16.7714	0.55778		685	70.099	65.849	4.24994
		686	4.76771	16.7714	-12.0036		686	71.955	65.849	6.10595
		687	14.5307	16.7714	-2.24063		687	71.2924	65.849	5.44337
		688	23.4015	16.7714	6.63014		688	67.576	65.849	1.72702
		689	15.6988	16.7714	-1.07252		689	72.3667	65.849	6.51771
		690	6.90849	16.7714	-9.86285		690	74.5329	65.849	8.68388
		691	3.02888	16.7714	-13.7425		691	72.326	65.849	6.47695
		692	14.651	16.7714	-2.12035		692	72.8153	65.849	6.9663
		693	20.0621	16.7714	3.29076		693	69.2552	65.849	3.40617
		694	18.3352	16.7714	1.56382		694	71.2699	65.849	5.42088
		695	9.37207	16.7714	-7.39928		695	72.7306	65.849	6.88158
		696	14.3863	16.7714	-2.38501		696	68.3329	65.849	2.48384
		697	17.8721	16.7714	1.10074		697	70.4109	65.849	4.56184
		698	3.31448	16.7714	-13.4569		698	71.6874	65.849	5.83837
		699	15.9724	16.7714	-0.79893		699	69.8324	65.849	3.98343
		700	17.0354	16.7714	0.26407		700	73.3672	65.849	7.51819
		701	18.5391	16.7714	1.76778		701	73.1225	65.849	7.2735
		702	13.5578	16.7714	-3.21357		702	68.3777	65.849	2.52872
		703	23.1605	16.7714	6.38915		703	69.9406	65.849	4.09156
		704	9.47868	16.7714	-7.29266		704	66.9005	65.849	1.05147
		705	13.4697	16.7714	-3.30169		705	64.7538	65.849	-1.09524
		706	14.2645	16.7714	-2.50682		706	68.9939	65.849	3.14489
		707	19.3531	16.7714	2.58172		707	66.6127	65.849	0.76362
		708	23.9201	16.7714	7.14872		708	67.8574	65.849	2.00836
		709	14.4088	16.7714	-2.36259		709	67.1586	65.849	1.30953
		710	20.4818	16.7714	3.71047		710	66.7243	65.849	0.8753
		711	18.1094	16.7714	1.33804		711	67.4787	65.849	1.62964
		712	20.1285	16.7714	3.3571		712	65.7168	65.849	-0.13223
		713	24.709	16.7714	7.93768		713	65.5055	65.849	-0.34347
		714	7.24085	16.7714	-9.53049		714	66.5726	65.849	0.72356
		715	14.68	16.7714	-2.09136		715	67.5983	65.849	1.74927
		716	21.7949	16.7714	5.02353		716	70.66	65.849	4.81094
		717	14.206	16.7714	-2.56533		717	67.1561	65.849	1.30706
		718	18.529	16.7714	1.75765		718	67.667	65.849	1.81797
		719	15.7583	16.7714	-1.01302		719	75.7771	65.849	9.9281
		720	17.2773	16.7714	0.50594		720	75.3926	65.849	9.54362
		721	22.1243	16.7714	5.35291		721	76.6535	65.849	10.8044
		722	15.9991	16.7714	-0.77228		722	69.8479	65.849	3.9989
		723	13.714	16.7714	-3.05731		723	73.4154	65.849	7.56634
		724	8.943	16.7714	-7.82835		724	67.5934	65.849	1.74434
		725	20.0434	16.7714	3.27209		725	65.5511	65.849	-0.29797
		726	25.7299	16.7714	8.95856		726	63.4355	65.849	-2.41352
		727	10.7372	16.7714	-6.03417		727	64.5862	65.849	-1.26284
		728	4.26007	16.7714	-12.5113		728	61.1937	65.849	-4.65528
		729	17.8649	16.7714	1.0936		729	61.5774	65.849	-4.27164
		730	19.1277	16.7714	2.35632		730	67.821	65.849	1.97203
		731	9.57703	16.7714	-7.19432		731	67.6486	65.849	1.79959
		732	14.4303	16.7714	-2.34107		732	71.2128	65.849	5.36379
		733	18.3758	16.7714	1.6045		733	70.6431	65.849	4.79404
		734	21.9779	16.7714	5.20657		734	68.8578	65.849	3.00875
		735	19.4354	16.7714	2.66411		735	65.9392	65.849	0.09019
		736	11.3927	16.7714	-5.37861		736	70.8524	65.849	5.0034
		737	12.3665	16.7714	-4.40483		737	70.7436	65.849	4.89457
		738	26.2647	16.7714	9.49332		738	68.5555	65.849	2.70652
		739	10.4133	16.7714	-6.35806		739	62.6648	65.849	-3.18423
		740	15.2135	16.7714	-1.55779		740	68.6295	65.849	2.78043
		741	9.03635	16.7714	-7.735		741	64.1865	65.849	-1.66253
		742	23.0446	16.7714	6.27325		742	74.4662	65.849	8.61718
		743	12.5236	16.7714	-4.24775		743	69.1568	65.849	3.30776
		744	21.5159	16.7714	4.74456		744	64.9133	65.849	-0.93568
		745	11.4515	16.7714	-5.31988		745	64.0184	65.849	-1.83058
		746	14.7698	16.7714	-2.00157		746	63.3263	65.849	-2.52267
		747	20.9499	16.7714	4.17856		747	66.1868	65.849	0.3378
		748	9.36623	16.7714	-7.40512		748	71.4627	65.849	5.61364
		749	15.9032	16.7714	-0.86816		749	66.2357	65.849	0.38671
		750	17.3431	16.7714	0.57171		750	59.8128	65.849	-6.03618
		751	5.5387	16.7714	-11.2326		751	62.947	65.849	-2.90199
		752	24.0896	16.7714	7.31826		752	63.2141	65.849	-2.63491
		753	19.4708	16.7714	2.69947		753	69.7036	65.849	3.8546
		754	13.4264	16.7714	-3.34499		754	70.0021	65.849	4.15312
		755	18.0327	16.7714	1.26132		755	71.6219	65.849	5.77289
		756	15.3126	16.7714	-1.4587		756	68.8366	65.849	2.98754
		757	18.7602	16.7714	1.98889		757	62.3122	65.849	-3.53684
		758	17.7783	16.7714	1.007		758	58.1735	65.849	-7.67555
		759	20.2061	16.7714	3.43479		759	61.0636	65.849	-4.78542
		760	18.5314	16.7714	1.7601		760	69.1256	65.849	3.27662
		761	15.6952	16.7714	-1.07613		761	60.2518	65.849	-5.59726
		762	14.4066	16.7714	-2.36474		762	59.9808	65.849	-5.8682
		763	17.0611	16.7714	0.28971		763	59.5137	65.849	-6.33532
		764	17.1923	16.7714	0.42091		764	61.3911	65.849	-4.45788
		765	8.77106	16.7714	-8.00028		765	61.449	65.849	-4.40006
		766	9.93434	16.7714	-6.83701		766	61.4506	65.849	-4.39838
		767	21.9395	16.7714	5.16813		767	61.8487	65.849	-4.00036
		768	14.6396	16.7714	-2.13175		768	63.6452	65.849	-2.20386
		769	11.6342	16.7714	-5.13713		769	71.231	65.849	5.38201
		770	12.5474	16.7714	-4.22397		770	70.8778	65.849	5.02878
		771	19.7621	16.7714	2.99078		771	67.1445	65.849	1.29544
		772	19.0561	16.7714	2.28478		772	59.9059	65.849	-5.94316
		773	20.8632	16.7714	4.09183		773	57.7321	65.849	-8.11697
		774	15.215	16.7714	-1.55635		774	57.7742	65.849	-8.07484
		775	20.7358	16.7714	3.96449		775	59.9173	65.849	-5.93171
		776	17.6453	16.7714	0.87397		776	62.5904	65.849	-3.25864
		777	19.5891	16.7714	2.81771		777	65.2251	65.849	-0.62395
		778	18.4929	16.7714	1.72156		778	64.3616	65.849	-1.48745
		779	27.5461	16.7714	10.7748		779	71.2252	65.849	5.3762
		780	15.43	16.7714	-1.3413		780	72.1067	65.849	6.25766
		781	12.0577	16.7714	-4.71361		781	64.8152	65.849	-1.03379
		782	13.2203	16.7714	-3.55103		782	72.3392	65.849	6.49016
		783	14.4585	16.7714	-2.31285		783	62.5381	65.849	-3.31092
		784	21.235	16.7714	4.46363		784	67.3798	65.849	1.53074
		785	17.3785	16.7714	0.60714		785	67.9541	65.849	2.10508
		786	16.3496	16.7714	-0.42175		786	61.2377	65.849	-4.61131
		787	19.2647	16.7714	2.49341		787	66.3724	65.849	0.52334
		788	22.0496	16.7714	5.27822		788	65.5605	65.849	-0.28854
		789	17.9544	16.7714	1.18305		789	71.1173	65.849	5.26827
		790	20.6917	16.7714	3.92039		790	69.3209	65.849	3.47184
		791	17.8738	16.7714	1.10248		791	67.3343	65.849	1.48526
		792	12.69	16.7714	-4.08134		792	60.6449	65.849	-5.20412
		793	10.676	16.7714	-6.09535		793	61.6213	65.849	-4.22771
		794	14.3029	16.7714	-2.46842		794	61.5082	65.849	-4.34087
		795	18.8287	16.7714	2.05738		795	72.289	65.849	6.44002
		796	8.9158	16.7714	-7.85554		796	60.3672	65.849	-5.48186
		797	17.8211	16.7714	1.04972		797	59.1674	65.849	-6.68162
		798	14.0543	16.7714	-2.71706		798	57.0384	65.849	-8.81065
		799	6.60548	16.7714	-10.1659		799	63.9787	65.849	-1.8703
		800	21.4048	16.7714	4.63342		800	69.3875	65.849	3.53852
		801	17.1974	16.7714	0.42608		801	65.0176	65.849	-0.8314
		802	20.9053	16.7714	4.134		802	60.1874	65.849	-5.66162
		803	9.15396	16.7714	-7.61738		803	68.0488	65.849	2.19975
		804	9.85492	16.7714	-6.91642		804	67.1966	65.849	1.34754
		805	21.4806	16.7714	4.70928		805	68.7322	65.849	2.88321
		806	19.4175	16.7714	2.64613		806	72.7149	65.849	6.86586
		807	19.1379	16.7714	2.36658		807	69.3346	65.849	3.48556
		808	12.1483	16.7714	-4.62303		808	69.3598	65.849	3.51082
		809	17.3728	16.7714	0.60149		809	69.3642	65.849	3.51521
		810	23.8979	16.7714	7.12655		810	68.304	65.849	2.45494
		811	15.267	16.7714	-1.50431		811	61.0874	65.849	-4.76166
		812	23.8814	16.7714	7.11006		812	67.5999	65.849	1.75087
		813	20.1845	16.7714	3.41315		813	65.6509	65.849	-0.19807
		814	18.8529	16.7714	2.08157		814	69.4236	65.849	3.57459
		815	11.613	16.7714	-5.1583		815	66.6376	65.849	0.78859
		816	21.0837	16.7714	4.31235		816	61.3004	65.849	-4.54863
		817	18.0369	16.7714	1.2655		817	62.152	65.849	-3.69699
		818	2.49924	16.7714	-14.2721		818	69.1346	65.849	3.28555
		819	11.4048	16.7714	-5.36658		819	68.9139	65.849	3.06491
		820	17.7222	16.7714	0.95085		820	67.788	65.849	1.93899
		821	18.0622	16.7714	1.29088		821	62.6904	65.849	-3.15863
		822	23.6904	16.7714	6.91905		822	67.8414	65.849	1.99236
		823	11.3532	16.7714	-5.41817		823	64.8743	65.849	-0.97472
		824	13.7543	16.7714	-3.01704		824	66.6718	65.849	0.8228
		825	26.8283	16.7714	10.0569		825	70.1696	65.849	4.32057
		826	15.0175	16.7714	-1.7539		826	71.7571	65.849	5.90803
		827	18.8229	16.7714	2.05152		827	63.7106	65.849	-2.13846
		828	24.7739	16.7714	8.00257		828	68.9814	65.849	3.13242
		829	21.6406	16.7714	4.8692		829	67.3438	65.849	1.4948
		830	11.554	16.7714	-5.21735		830	66.079	65.849	0.22999
		831	5.89956	16.7714	-10.8718		831	69.6321	65.849	3.7831
		832	17.5752	16.7714	0.80388		832	65.6523	65.849	-0.19671
		833	21.3737	16.7714	4.60238		833	68.5095	65.849	2.66044
		834	21.0381	16.7714	4.26679		834	70.9269	65.849	5.07785
		835	14.7403	16.7714	-2.031		835	63.8051	65.849	-2.04391
		836	9.49106	16.7714	-7.28028		836	65.8656	65.849	0.01654
		837	13.3498	16.7714	-3.42151		837	59.9761	65.849	-5.87296
		838	8.91956	16.7714	-7.85179		838	64.1137	65.849	-1.73536
		839	18.4099	16.7714	1.63859		839	62.2207	65.849	-3.62828
		840	21.4184	16.7714	4.64707		840	61.771	65.849	-4.078
		841	19.9102	16.7714	3.13882		841	65.4644	65.849	-0.38465
		842	15.5212	16.7714	-1.25015		842	65.8762	65.849	0.02718
		843	17.2726	16.7714	0.50124		843	70.8822	65.849	5.03316
		844	11.8457	16.7714	-4.92562		844	69.7746	65.849	3.92553
		845	22.3314	16.7714	5.56009		845	70.9577	65.849	5.1087
		846	20.6591	16.7714	3.88777		846	65.481	65.849	-0.36803
		847	22.2144	16.7714	5.44304		847	67.724	65.849	1.87502
		848	15.962	16.7714	-0.80931		848	67.8039	65.849	1.95491
		849	8.32178	16.7714	-8.44957		849	63.3738	65.849	-2.47521
		850	17.1211	16.7714	0.34973		850	61.0492	65.849	-4.79985
		851	16.5715	16.7714	-0.19987		851	62.9742	65.849	-2.87483
		852	21.3946	16.7714	4.62325		852	60.5945	65.849	-5.25457
		853	22.5659	16.7714	5.7945		853	63.9025	65.849	-1.94653
		854	22.2725	16.7714	5.50118		854	58.7705	65.849	-7.07852
		855	23.727	16.7714	6.95563		855	60.1759	65.849	-5.67312
		856	17.0884	16.7714	0.31708		856	60.566	65.849	-5.28298
		857	4.36443	16.7714	-12.4069		857	63.5682	65.849	-2.28086
		858	14.7847	16.7714	-1.98662		858	66.7148	65.849	0.86576
		859	18.5742	16.7714	1.80285		859	64.7486	65.849	-1.10046
		860	20.9537	16.7714	4.18235		860	68.5513	65.849	2.70232
		861	21.0147	16.7714	4.24336		861	69.0577	65.849	3.20873
		862	24.6985	16.7714	7.92711		862	70.3631	65.849	4.51407
		863	20.7804	16.7714	4.00905		863	72.3918	65.849	6.54276
		864	16.1384	16.7714	-0.63296		864	69.513	65.849	3.66398
		865	13.4076	16.7714	-3.36377		865	66.4608	65.849	0.61173
		866	16.3198	16.7714	-0.45152		866	63.8343	65.849	-2.01476
		867	15.7921	16.7714	-0.97926		867	59.4778	65.849	-6.37123
		868	1.70004	16.7714	-15.0713		868	71.6795	65.849	5.83048
		869	21.1943	16.7714	4.42298		869	72.8549	65.849	7.00592
		870	7.20377	16.7714	-9.56758		870	70.5317	65.849	4.6827
		871	8.91098	16.7714	-7.86037		871	70.063	65.849	4.21393
		872	19.9047	16.7714	3.13334		872	67.2097	65.849	1.36063
		873	16.5902	16.7714	-0.18111		873	67.2078	65.849	1.35877
		874	17.507	16.7714	0.73565		874	72.1034	65.849	6.25439
		875	18.3964	16.7714	1.62503		875	67.5112	65.849	1.66222
		876	23.5835	16.7714	6.81211		876	63.0821	65.849	-2.76695
		877	16.421	16.7714	-0.35034		877	69.6715	65.849	3.82249
		878	16.2398	16.7714	-0.53158		878	68.3253	65.849	2.47631
		879	13.4402	16.7714	-3.33119		879	76.8025	65.849	10.9534
		880	9.24013	16.7714	-7.53121		880	64.1425	65.849	-1.70647
		881	5.49653	16.7714	-11.2748		881	62.7483	65.849	-3.10069
		882	12.7517	16.7714	-4.01963		882	72.1923	65.849	6.34332
		883	4.9722	16.7714	-11.7991		883	70.788	65.849	4.93895
		884	10.1542	16.7714	-6.61717		884	65.342	65.849	-0.50701
		885	25.5898	16.7714	8.81844		885	71.2955	65.849	5.44648
		886	11.5254	16.7714	-5.24594		886	69.9004	65.849	4.05139
		887	15.8403	16.7714	-0.93104		887	64.967	65.849	-0.88203
		888	16.0833	16.7714	-0.68807		888	63.3447	65.849	-2.50436
		889	3.8742	16.7714	-12.8971		889	65.1345	65.849	-0.71456
		890	23.131	16.7714	6.3597		890	66.4507	65.849	0.6017
		891	20.0674	16.7714	3.29603		891	69.5324	65.849	3.68337
		892	9.47356	16.7714	-7.29779		892	69.4427	65.849	3.59366
		893	19.5278	16.7714	2.75644		893	69.8344	65.849	3.98536
		894	20.9659	16.7714	4.1946		894	58.4018	65.849	-7.44724
		895	12.4026	16.7714	-4.36877		895	62.9434	65.849	-2.90563
		896	18.5197	16.7714	1.74841		896	57.8641	65.849	-7.98489
		897	14.4697	16.7714	-2.30163		897	57.7975	65.849	-8.05153
		898	15.3532	16.7714	-1.41816		898	57.2243	65.849	-8.62473
		899	5.26115	16.7714	-11.5102		899	69.1363	65.849	3.28726
		900	18.8485	16.7714	2.07715		900	69.577	65.849	3.72802
		901	22.4794	16.7714	5.70807		901	73.9541	65.849	8.1051
		902	13.9398	16.7714	-2.83158		902	63.948	65.849	-1.90106
		903	17.8821	16.7714	1.11073		903	72.1245	65.849	6.27547
		904	13.6134	16.7714	-3.15791		904	62.5319	65.849	-3.31711
		905	10.9202	16.7714	-5.85119		905	66.0953	65.849	0.24625
		906	14.477	16.7714	-2.29437		906	62.7832	65.849	-3.06586
		907	24.9283	16.7714	8.15691		907	67.0057	65.849	1.15665
		908	19.8684	16.7714	3.09711		908	60.2056	65.849	-5.64344
		909	16.6181	16.7714	-0.15325		909	64.9807	65.849	-0.86835
		910	9.91582	16.7714	-6.85552		910	57.4879	65.849	-8.36112
		911	13.5389	16.7714	-3.23249		911	62.1751	65.849	-3.67395
		912	12.7288	16.7714	-4.04251		912	63.9899	65.849	-1.8591
		913	16.2308	16.7714	-0.5406		913	53.0772	65.849	-12.7718
		914	16.3616	16.7714	-0.40979		914	68.753	65.849	2.90394
		915	26.374	16.7714	9.60268		915	58.7531	65.849	-7.0959
		916	18.6495	16.7714	1.87816		916	61.0785	65.849	-4.7705
		917	13.8034	16.7714	-2.9679		917	57.2973	65.849	-8.55171
		918	20.2163	16.7714	3.44496		918	64.9056	65.849	-0.94343
		919	20.2578	16.7714	3.48643		919	70.4299	65.849	4.58092
		920	10.8425	16.7714	-5.92887		920	74.3779	65.849	8.52884
		921	18.9176	16.7714	2.14624		921	70.7498	65.849	4.90077
		922	7.08672	16.7714	-9.68462		922	69.0138	65.849	3.16477
		923	21.6983	16.7714	4.92695		923	60.3719	65.849	-5.47713
		924	18.7994	16.7714	2.02808		924	62.1272	65.849	-3.72183
		925	24.034	16.7714	7.26265		925	71.2383	65.849	5.38929
		926	19.664	16.7714	2.89266		926	66.645	65.849	0.79601
		927	20.0885	16.7714	3.31716		927	63.8779	65.849	-1.9711
		928	14.8424	16.7714	-1.92897		928	55.067	65.849	-10.782
		929	28.5918	16.7714	11.8204		929	65.0268	65.849	-0.82219
		930	7.7521	16.7714	-9.01924		930	63.6733	65.849	-2.17571
		931	13.7692	16.7714	-3.00213		931	62.4415	65.849	-3.40754
		932	22.7705	16.7714	5.99915		932	60.8196	65.849	-5.0294
		933	7.74695	16.7714	-9.02439		933	58.5626	55.0513	3.51131
		934	22.7425	16.7714	5.97117		934	60.368	55.0513	5.31664
		935	16.2118	16.7714	-0.55951		935	51.4179	55.0513	-3.63335
		936	7.44771	16.7714	-9.32364		936	61.3897	55.0513	6.33839
		937	17.4017	16.7714	0.63041		937	53.0906	55.0513	-1.96072
		938	16.1082	16.7714	-0.66317		938	56.3347	55.0513	1.28343
		939	25.163	16.7714	8.39167		939	64.1926	55.0513	9.1413
		940	22.3707	16.7714	5.59932		940	59.6346	55.0513	4.58331
		941	22.227	16.7714	5.45562		941	57.6392	55.0513	2.58791
		942	24.9626	16.7714	8.19124		942	55.0612	55.0513	0.00993
		943	22.2772	16.7714	5.50584		943	54.0154	55.0513	-1.0359
		944	3.61937	16.7714	-13.152		944	54.3868	55.0513	-0.66453
		945	20.1084	16.7714	3.33702		945	53.7305	55.0513	-1.32081
		946	22.7312	16.7714	5.95982		946	58.7174	55.0513	3.66605
		947	17.3613	16.7714	0.58992		947	59.8429	55.0513	4.79159
		948	9.64381	16.7714	-7.12754		948	54.826	55.0513	-0.22527
		949	21.5973	16.7714	4.82592		949	55.3555	55.0513	0.30422
		950	27.5728	16.7714	10.8015		950	54.8865	55.0513	-0.16485
		951	23.9033	16.7714	7.13199		951	62.4727	55.0513	7.42142
		952	12.5297	16.7714	-4.24165		952	61.8564	55.0513	6.80513
		953	5.56493	16.7714	-11.2064		953	63.1953	55.0513	8.14402
		954	22.6988	16.7714	5.92747		954	58.2311	55.0513	3.17978
		955	16.5136	16.7714	-0.25776		955	58.9605	55.0513	3.90924
		956	16.1184	16.7714	-0.65296		956	67.3997	55.0513	12.3484
		957	19.2391	16.7714	2.46774		957	62.3837	55.0513	7.3324
		958	17.172	16.7714	0.40066		958	63.9337	55.0513	8.88242
		959	15.1866	16.7714	-1.58479		959	60.7799	55.0513	5.72861
		960	16.0408	16.7714	-0.73053		960	58.8268	55.0513	3.77554
		961	13.3005	16.7714	-3.47085		961	53.4333	55.0513	-1.61797
		962	13.1292	16.7714	-3.64213		962	53.6511	55.0513	-1.40019
		963	17.6981	16.7714	0.92676		963	68.9219	55.0513	13.8706
		964	23.6446	16.7714	6.87331		964	57.4509	55.0513	2.39959
		965	17.3035	16.7714	0.53213		965	68.8382	55.0513	13.7869
		966	12.7007	16.7714	-4.07068		966	57.7445	55.0513	2.69323
		967	19.7822	16.7714	3.01086		967	59.9953	55.0513	4.94399
		968	15.9114	16.7714	-0.85994		968	60.2307	55.0513	5.17936
		969	18.0871	16.7714	1.31574		969	58.3386	55.0513	3.28725
		970	23.922	16.7714	7.15062		970	55.5088	55.0513	0.45748
		971	24.869	16.7714	8.09767		971	56.6907	55.0513	1.63943
		972	12.0493	16.7714	-4.72205		972	56.2572	55.0513	1.20592
		973	5.03308	16.7714	-11.7383		973	57.8212	55.0513	2.7699
		974	18.2398	16.7714	1.46847		974	58.3889	55.0513	3.33757
		975	12.9317	16.7714	-3.83968		975	56.1823	55.0513	1.13104
		976	22.3693	16.7714	5.59798		976	56.4534	55.0513	1.40211
		977	21.7893	16.7714	5.01793		977	68.3225	65.849	2.47344
		978	6.83764	16.7714	-9.93371		978	65.533	65.849	-0.31599
		979	16.6754	16.7714	-0.0959		979	58.2355	65.849	-7.61353
		980	13.4668	16.7714	-3.30455		980	59.748	65.849	-6.10106
		981	22.6282	16.7714	5.85682		981	62.9434	65.849	-2.90561
		982	14.0549	16.7714	-2.71643		982	61.1846	65.849	-4.66437
		983	18.4252	16.7714	1.6539		983	61.2522	65.849	-4.59685
		984	22.4585	16.7714	5.68719		984	67.3757	65.849	1.52673
		985	20.6744	16.7714	3.9031		985	63.3918	65.849	-2.45724
		986	11.4693	16.7714	-5.30201		986	59.3352	65.849	-6.51386
		987	21.1502	16.7714	4.37882		987	51.7137	65.849	-14.1353
		988	16.0424	16.7714	-0.72893		988	58.1054	65.849	-7.74365
		989	14.0584	16.7714	-2.7129		989	65.8545	65.849	0.00551
		990	22.3183	16.7714	5.54694		990	71.4319	65.849	5.58289
		991	17.9894	16.7714	1.21807		991	60.2059	65.849	-5.64314
		992	21.2896	16.7714	4.51826		992	57.1767	65.849	-8.67229
		993	17.1452	16.7714	0.37382		993	62.2847	65.849	-3.5643
		994	22.9239	16.7714	6.15253		994	59.2871	65.849	-6.56196
		995	11.4156	16.7714	-5.35572		995	58.7541	65.849	-7.09494
		996	23.8425	16.7714	7.07111		996	61.086	65.849	-4.763
		997	15.5348	16.7714	-1.23653		997	62.359	65.849	-3.49002
		998	19.0096	16.7714	2.23825		998	60.5742	65.849	-5.27478
		999	5.48271	16.7714	-11.2886		999	63.1014	65.849	-2.74764
		1000	20.5881	16.7714	3.81675		1000	63.6243	65.849	-2.22468
		1001	25.3733	16.7714	8.602		1001	57.6203	65.849	-8.22869
		1002	14.4619	16.7714	-2.30948		1002	58.4368	65.849	-7.41227
		1003	11.9489	16.7714	-4.82242		1003	71.3115	65.849	5.46248
		1004	11.2718	16.7714	-5.49951		1004	58.5618	55.0513	3.5105
		1005	10.1648	16.7714	-6.60653		1005	56.7488	55.0513	1.69752
		1006	14.464	16.7714	-2.30737		1006	55.4422	55.0513	0.3909
		1007	12.9488	16.7714	-3.82253		1007	59.8447	55.0513	4.79336
		1008	9.18766	16.7714	-7.58369		1008	63.1341	55.0513	8.0828
		1009	8.46283	16.7714	-8.30851		1009	62.8263	55.0513	7.77501
		1010	14.3711	16.7714	-2.4002		1010	60.0398	55.0513	4.98848
		1011	21.6839	16.7714	4.91256		1011	64.3284	55.0513	9.2771
		1012	25.855	16.7714	9.08366		1012	57.1158	55.0513	2.06448
		1013	21.5524	16.7714	4.78103		1013	61.1968	55.0513	6.14548
		1014	18.4906	16.7714	1.71925		1014	55.2562	55.0513	0.20489
		1015	18.65	16.7714	1.87865		1015	53.0687	55.0513	-1.98259
		1016	11.8129	16.7714	-4.95849		1016	61.3323	55.0513	6.28103
		1017	22.5809	16.7714	5.80956		1017	58.7514	55.0513	3.70014
		1018	16.1981	16.7714	-0.5732		1018	59.5835	55.0513	4.53217
		1019	26.4726	16.7714	9.70126		1019	55.5796	55.0513	0.52834
		1020	19.0919	16.7714	2.32055		1020	57.8921	55.0513	2.84083
		1021	11.9364	16.7714	-4.83499		1021	59.1931	55.0513	4.14178
		1022	16.077	16.7714	-0.69431		1022	58.3013	55.0513	3.24996
		1023	25.165	16.7714	8.39362		1023	65.7995	55.0513	10.7482
		1024	13.2716	16.7714	-3.49974		1024	60.2118	55.0513	5.1605
		1025	17.0463	16.7714	0.27491		1025	60.1338	55.0513	5.0825
		1026	16.1774	16.7714	-0.59392		1026	70.497	55.0513	15.4457
		1027	11.3595	16.7714	-5.4119		1027	58.8033	55.0513	3.752
		1028	20.4565	16.7714	3.68513		1028	64.4241	55.0513	9.37285
		1029	14.6457	16.7714	-2.12565		1029	57.592	55.0513	2.54068
		1030	9.3967	16.7714	-7.37465		1030	65.748	55.0513	10.6966
		1031	22.5139	16.7714	5.74253		1031	60.4699	55.0513	5.41857
		1032	20.1178	16.7714	3.3465		1032	57.1291	55.0513	2.07781
		1033	5.43863	16.7714	-11.3327		1033	58.5136	55.0513	3.46235
		1034	19.2234	16.7714	2.45208		1034	64.8233	55.0513	9.77198
		1035	12.5288	16.7714	-4.24254		1035	62.0833	55.0513	7.03197
		1036	17.4411	16.7714	0.66977		1036	55.3138	55.0513	0.2625
		1037	22.5807	16.7714	5.80936		1037	57.5365	55.0513	2.48515
		1038	15.9918	16.7714	-0.77952		1038	57.2038	55.0513	2.15254
		1039	18.617	16.7714	1.84568		1039	56.2617	55.0513	1.21042
		1040	5.64934	16.7714	-11.122		1040	55.6709	55.0513	0.61955
		1041	8.11037	16.7714	-8.66097		1041	55.1035	55.0513	0.0522
		1042	12.2002	16.7714	-4.57114		1042	57.5744	55.0513	2.52313
		1043	14.5909	16.7714	-2.18049		1043	56.6158	55.0513	1.56448
		1044	22.8905	16.7714	6.11918		1044	64.0258	55.0513	8.97449
		1045	20.6212	16.7714	3.84986		1045	57.0599	55.0513	2.00862
		1046	19.2537	16.7714	2.4823		1046	63.178	55.0513	8.12671
		1047	11.7159	16.7714	-5.05541		1047	63.3564	55.0513	8.30514
		1048	24.6419	16.7714	7.87058		1048	55.5363	55.0513	0.48503
		1049	17.8633	16.7714	1.09198		1049	57.879	55.0513	2.82772
		1050	22.7402	16.7714	5.96883		1050	56.672	55.0513	1.62071
		1051	19.1634	16.7714	2.39208		1051	57.5922	55.0513	2.5409
		1052	17.0928	16.7714	0.32142		1052	65.7874	65.849	-0.06167
		1053	17.5788	16.7714	0.80751		1053	66.1511	65.849	0.30205
		1054	17.9367	16.7714	1.16538		1054	58.4491	65.849	-7.3999
		1055	18.018	16.7714	1.24664		1055	68.5455	65.849	2.6965
		1056	8.61727	16.7714	-8.15407		1056	64.8267	65.849	-1.0223
		1057	18.8914	16.7714	2.12009		1057	68.6788	65.849	2.82979
		1058	10.3723	16.7714	-6.39902		1058	71.7419	65.849	5.89287
		1059	7.77749	16.7714	-8.99385		1059	61.109	65.849	-4.74006
		1060	16.5399	16.7714	-0.23148		1060	54.233	55.0513	-0.81834
		1061	18.6785	16.7714	1.90716		1061	60.9918	55.0513	5.9405
		1062	19.6826	16.7714	2.91131		1062	66.8942	55.0513	11.8429
		1063	17.9724	16.7714	1.20103		1063	55.3358	55.0513	0.28451
		1064	20.7809	16.7714	4.00959		1064	58.2663	55.0513	3.21503
		1065	9.19647	16.7714	-7.57487		1065	69.4261	55.0513	14.3748
		1066	23.2443	16.7714	6.473		1066	58.9897	55.0513	3.93837
		1067	8.21461	16.7714	-8.55674		1067	55.6495	55.0513	0.59821
		1068	17.1673	16.7714	0.39591		1068	55.1401	55.0513	0.08877
		1069	21.5627	16.7714	4.79139		1069	54.4927	55.0513	-0.55862
		1070	14.399	16.7714	-2.37234		1070	60.8928	55.0513	5.84154
		1071	20.442	16.7714	3.67067		1071	55.9176	55.0513	0.86632
		1072	10.1223	16.7714	-6.64903		1072	64.7897	55.0513	9.7384
		1073	17.5645	16.7714	0.79317		1073	58.2393	55.0513	3.18799
		1074	17.0598	16.7714	0.28842		1074	66.6715	55.0513	11.6202
		1075	15.1749	16.7714	-1.59646		1075	59.2405	55.0513	4.18921
		1076	19.9532	16.7714	3.18188		1076	56.0198	55.0513	0.96854
		1077	12.4503	16.7714	-4.32105		1077	61.6848	55.0513	6.63347
		1078	17.6722	16.7714	0.90081		1078	62.6386	55.0513	7.58727
		1079	12.3612	16.7714	-4.4102		1079	62.5215	55.0513	7.47018
		1080	10.0787	16.7714	-6.69261		1080	61.4078	55.0513	6.3565
		1081	24.2032	16.7714	7.43184		1081	57.9303	55.0513	2.87899
		1082	21.5127	16.7714	4.74137		1082	55.1939	55.0513	0.14259
		1083	20.6535	16.7714	3.88214		1083	73.5533	65.849	7.70426
		1084	16.0594	16.7714	-0.71196		1084	61.3857	65.849	-4.46333
		1085	19.4811	16.7714	2.70974		1085	56.3215	65.849	-9.52752
		1086	7.02446	16.7714	-9.74688		1086	68.352	65.849	2.50302
		1087	18.4006	16.7714	1.62924		1087	67.2346	65.849	1.3856
		1088	21.7732	16.7714	5.00183		1088	62.9458	65.849	-2.90319
		1089	14.1313	16.7714	-2.64004		1089	66.8949	65.849	1.04589
		1090	15.7281	16.7714	-1.04328		1090	58.1772	65.849	-7.67186
		1091	16.1088	16.7714	-0.66256		1091	58.6892	65.849	-7.15979
		1092	11.5385	16.7714	-5.23281		1092	62.481	65.849	-3.36799
		1093	15.1967	16.7714	-1.57465		1093	61.5408	65.849	-4.30827
		1094	20.1347	16.7714	3.36337		1094	59.958	65.849	-5.89102
		1095	11.8651	16.7714	-4.90629		1095	56.508	65.849	-9.341
		1096	23.6931	16.7714	6.92173		1096	58.0564	65.849	-7.79261
		1097	20.3157	16.7714	3.54433		1097	72.0824	65.849	6.23343
		1098	13.1548	16.7714	-3.61655		1098	61.074	65.849	-4.77506
		1099	0.89475	16.7714	-15.8766		1099	57.533	65.849	-8.31601
		1100	17.2828	16.7714	0.5114		1100	62.1987	65.849	-3.65031
		1101	13.1168	16.7714	-3.65451		1101	64.9881	65.849	-0.86091
		1102	23.1476	16.7714	6.37627		1102	58.4654	55.0513	3.41405
		1103	15.0771	16.7714	-1.69421		1103	54.6693	55.0513	-0.382
		1104	18.9354	16.7714	2.16404		1104	54.103	55.0513	-0.94832
		1105	15.4144	16.7714	-1.35696		1105	54.141	55.0513	-0.9103
		1106	9.61451	16.7714	-7.15684		1106	51.0395	55.0513	-4.01179
		1107	13.8774	16.7714	-2.89392		1107	64.624	55.0513	9.57271
		1108	17.3523	16.7714	0.58098		1108	49.9947	55.0513	-5.05661
		1109	10.3609	16.7714	-6.41049		1109	57.1892	55.0513	2.13789
		1110	7.7763	16.7714	-8.99505		1110	54.4686	55.0513	-0.58275
		1111	20.022	16.7714	3.25063		1111	67.3215	55.0513	12.2702
		1112	19.1608	16.7714	2.3894		1112	59.0227	55.0513	3.97137
		1113	14.2973	16.7714	-2.47407		1113	57.546	55.0513	2.49466
		1114	17.0705	16.7714	0.29913		1114	66.5882	55.0513	11.5369
		1115	13.231	16.7714	-3.54032		1115	65.6678	55.0513	10.6165
		1116	3.62982	16.7714	-13.1415		1116	59.6982	55.0513	4.64693
		1117	19.8449	16.7714	3.07353		1117	51.4901	55.0513	-3.56123
		1118	19.0969	16.7714	2.32556		1118	64.4528	55.0513	9.40152
		1119	16.7158	16.7714	-0.0555		1119	56.2873	55.0513	1.23596
		1120	16.122	16.7714	-0.64931		1120	57.2566	55.0513	2.20528
		1121	15.0463	16.7714	-1.72502		1121	52.0525	55.0513	-2.99883
		1122	20.5864	16.7714	3.81503		1122	52.7322	55.0513	-2.31912
		1123	17.6062	16.7714	0.83486		1123	56.223	55.0513	1.17172
		1124	15.802	16.7714	-0.96934		1124	58.2859	55.0513	3.23462
		1125	13.6562	16.7714	-3.11515		1125	56.4448	55.0513	1.39352
		1126	18.5733	16.7714	1.80199		1126	67.2247	65.849	1.37564
		1127	20.8729	16.7714	4.1016		1127	68.663	65.849	2.81398
		1128	18.1573	16.7714	1.38598		1128	70.1184	65.849	4.2694
		1129	15.6024	16.7714	-1.16892		1129	62.0973	65.849	-3.75172
		1130	16.8881	16.7714	0.11677		1130	64.4351	65.849	-1.41391
		1131	2.07201	16.7714	-14.6993		1131	57.9537	65.849	-7.89537
		1132	24.5885	16.7714	7.81712		1132	54.3117	65.849	-11.5373
		1133	18.2327	16.7714	1.46133		1133	70.3182	65.849	4.46921
		1134	16.1834	16.7714	-0.58799		1134	56.9647	65.849	-8.88435
		1135	15.8824	16.7714	-0.88897		1135	60.1129	65.849	-5.73611
		1136	18.4642	16.7714	1.69284		1136	65.254	65.849	-0.59504
		1137	18.7898	16.7714	2.01845		1137	63.5021	65.849	-2.34689
		1138	19.7175	16.7714	2.94614		1138	57.9417	55.0513	2.89038
		1139	16.3954	16.7714	-0.37591		1139	57.53	55.0513	2.47868
		1140	12.1076	16.7714	-4.66371		1140	58.0306	55.0513	2.97926
		1141	21.4595	16.7714	4.68816		1141	58.6894	55.0513	3.63808
		1142	12.9771	16.7714	-3.7943		1142	57.446	55.0513	2.39466
		1143	11.3029	16.7714	-5.46849		1143	60.3098	55.0513	5.25852
		1144	15.5123	16.7714	-1.25903		1144	56.0668	55.0513	1.01547
		1145	6.4934	16.7714	-10.278		1145	63.0632	55.0513	8.01185
		1146	14.0782	16.7714	-2.69319		1146	59.0846	55.0513	4.03327
		1147	8.95174	16.7714	-7.8196		1147	62.8066	55.0513	7.75528
		1148	15.0771	16.7714	-1.69422		1148	63.3625	55.0513	8.31118
		1149	13.0297	16.7714	-3.74165		1149	63.579	55.0513	8.52772
		1150	11.2095	16.7714	-5.56183		1150	60.7457	55.0513	5.69436
		1151	17.3078	16.7714	0.53642		1151	59.1591	55.0513	4.10782
		1152	25.1189	16.7714	8.34755		1152	57.4117	55.0513	2.36044
		1153	14.8842	16.7714	-1.88711		1153	57.4699	55.0513	2.41857
		1154	18.2207	16.7714	1.44937		1154	56.6409	55.0513	1.58957
		1155	18.0961	16.7714	1.3247		1155	60.5655	55.0513	5.51419
		1156	6.6255	16.7714	-10.1458		1156	58.1073	55.0513	3.056
		1157	23.9829	16.7714	7.21153		1157	72.445	55.0513	17.3937
		1158	12.0596	16.7714	-4.7117		1158	58.1814	55.0513	3.13011
		1159	12.259	16.7714	-4.51235		1159	59.8321	55.0513	4.78075
		1160	18.6913	16.7714	1.91994		1160	56.2092	55.0513	1.15789
		1161	14.9808	16.7714	-1.79059		1161	55.7505	55.0513	0.69916
		1162	19.913	16.7714	3.14164		1162	64.0252	65.849	-1.82382
		1163	12.9677	16.7714	-3.80361		1163	64.9046	65.849	-0.94446
		1164	14.8071	16.7714	-1.96424		1164	60.7686	65.849	-5.08042
		1165	18.8551	16.7714	2.08375		1165	70.9299	65.849	5.08092
		1166	16.6287	16.7714	-0.14263		1166	61.2063	65.849	-4.64275
		1167	24.8636	16.7714	8.09228		1167	68.7895	65.849	2.94048
		1168	21.8612	16.7714	5.08983		1168	59.0158	65.849	-6.83322
		1169	28.604	16.7714	11.8326		1169	57.4541	65.849	-8.39492
		1170	19.675	16.7714	2.90362		1170	58.2044	65.849	-7.64465
		1171	24.6267	16.7714	7.85537		1171	60.3033	65.849	-5.54576
		1172	10.1515	16.7714	-6.61981		1172	59.1185	65.849	-6.73051
		1173	17.2116	16.7714	0.44022		1173	59.6776	65.849	-6.17145
		1174	17.091	16.7714	0.31963		1174	67.4713	65.849	1.62228
		1175	15.1304	16.7714	-1.64098		1175	57.9462	65.849	-7.90277
		1176	11.608	16.7714	-5.16338		1176	63.3331	65.849	-2.51595
		1177	16.5931	16.7714	-0.17826		1177	62.3271	65.849	-3.52192
		1178	24.1594	16.7714	7.3881		1178	60.0327	65.849	-5.81635
		1179	23.4615	16.7714	6.69015		1179	61.5625	65.849	-4.28648
		1180	23.2658	16.7714	6.4945		1180	59.7637	65.849	-6.08537
		1181	24.0842	16.7714	7.31282		1181	62.3107	65.849	-3.53827
		1182	9.43559	16.7714	-7.33576		1182	58.0441	65.849	-7.80496
		1183	5.54356	16.7714	-11.2278		1183	57.5485	65.849	-8.30047
		1184	17.9225	16.7714	1.15113		1184	61.2326	65.849	-4.61642
		1185	23.4818	16.7714	6.71044		1185	70.4355	65.849	4.58648
		1186	5.58698	16.7714	-11.1844		1186	68.7869	65.849	2.93786
		1187	14.6089	16.7714	-2.1624		1187	67.6106	65.849	1.7616
		1188	4.989	16.7714	-11.7823		1188	61.7941	65.849	-4.05492
		1189	10.6165	16.7714	-6.15484		1189	58.2458	65.849	-7.60319
		1190	19.0565	16.7714	2.28511		1190	57.5139	65.849	-8.33516
		1191	15.1123	16.7714	-1.65905		1191	70.5928	65.849	4.74376
		1192	14.1995	16.7714	-2.57184		1192	74.1815	65.849	8.33252
		1193	14.0269	16.7714	-2.7444		1193	57.4059	65.849	-8.44314
		1194	18.6573	16.7714	1.88592		1194	75.1833	65.849	9.33426
		1195	5.77527	16.7714	-10.9961		1195	57.0707	65.849	-8.7783
		1196	17.9103	16.7714	1.13895		1196	63.3145	65.849	-2.5345
		1197	7.11681	16.7714	-9.65453		1197	71.8589	65.849	6.00985
		1198	8.52564	16.7714	-8.24571		1198	56.0097	65.849	-9.83934
		1199	17.6949	16.7714	0.92358		1199	60.4757	65.849	-5.37328
		1200	7.15217	16.7714	-9.61917		1200	69.9096	65.849	4.0606
		1201	19.1663	16.7714	2.39493		1201	71.7446	65.849	5.8956
		1202	0.93707	16.7714	-15.8343		1202	65.9628	65.849	0.11377
		1203	16.6671	16.7714	-0.10424		1203	56.3302	55.0513	1.27885
		1204	22.9264	16.7714	6.15505		1204	57.842	55.0513	2.79068
		1205	25.7889	16.7714	9.01754		1205	57.9455	55.0513	2.89419
		1206	5.75894	16.7714	-11.0124		1206	61.7596	55.0513	6.70831
		1207	21.1282	16.7714	4.35683		1207	59.9725	55.0513	4.92117
		1208	8.73195	16.7714	-8.0394		1208	59.9788	55.0513	4.92753
		1209	24.5958	16.7714	7.82448		1209	55.2902	55.0513	0.23889
		1210	18.9499	16.7714	2.17858		1210	64.3443	55.0513	9.29302
		1211	6.67464	16.7714	-10.0967		1211	61.9323	55.0513	6.88102
		1212	19.7873	16.7714	3.01596		1212	54.9057	55.0513	-0.14555
		1213	7.3748	16.7714	-9.39655		1213	60.5737	55.0513	5.52239
		1214	17.1174	16.7714	0.34608		1214	58.7336	55.0513	3.68228
		1215	17.6396	16.7714	0.86822		1215	62.704	55.0513	7.65269
		1216	11.0725	16.7714	-5.69882		1216	56.3706	55.0513	1.31924
		1217	22.1211	16.7714	5.34973		1217	59.5348	55.0513	4.4835
		1218	10.8932	16.7714	-5.87812		1218	62.9432	55.0513	7.89191
		1219	10.7355	16.7714	-6.03588		1219	33.5512	35.4776	-1.9264
		1220	19.0586	16.7714	2.28723		1220	42.8406	35.4776	7.36304
		1221	24.1211	16.7714	7.34971		1221	50.0496	55.0513	-5.00172
		1222	22.7446	16.7714	5.97327		1222	51.5387	55.0513	-3.51257
		1223	24.1335	16.7714	7.3622		1223	52.1003	55.0513	-2.95101
		1224	17.7151	16.7714	0.94378		1224	49.1902	55.0513	-5.86106
		1225	18.9568	16.7714	2.18541		1225	50.5122	55.0513	-4.53912
		1226	15.68	16.7714	-1.09132		1226	66.1632	55.0513	11.1119
		1227	8.85932	16.7714	-7.91203		1227	56.1371	55.0513	1.08582
		1228	17.1829	16.7714	0.41153		1228	51.8387	55.0513	-3.21265
		1229	16.6741	16.7714	-0.09728		1229	52.0157	55.0513	-3.03556
		1230	23.1866	16.7714	6.41528		1230	49.1219	55.0513	-5.92935
		1231	13.6874	16.7714	-3.08395		1231	50.6056	55.0513	-4.44565
		1232	16.6187	16.7714	-0.15267		1232	65.8741	65.849	0.02506
		1233	16.3153	16.7714	-0.456		1233	58.5049	65.849	-7.34411
		1234	13.5689	16.7714	-3.20242		1234	76.4866	65.849	10.6376
		1235	8.58203	16.7714	-8.18931		1235	72.6025	65.849	6.75349
		1236	15.1614	16.7714	-1.60992		1236	51.635	55.0513	-3.41627
		1237	13.4007	16.7714	-3.37065		1237	54.3665	55.0513	-0.68476
		1238	16.9085	16.7714	0.1372		1238	47.1785	55.0513	-7.8728
		1239	21.6451	16.7714	4.87376		1239	59.3465	55.0513	4.29515
		1240	24.7863	16.7714	8.015		1240	70.696	55.0513	15.6447
		1241	15.7225	16.7714	-1.04882		1241	49.6125	55.0513	-5.43885
		1242	13.2562	16.7714	-3.5151		1242	50.8188	55.0513	-4.23254
		1243	17.8611	16.7714	1.08976		1243	53.3513	55.0513	-1.70004
		1244	24.9205	16.7714	8.14915		1244	50.0027	55.0513	-5.04861
		1245	18.5085	16.7714	1.73717		1245	58.2927	55.0513	3.24137
		1246	19.1048	16.7714	2.33341		1246	67.5026	55.0513	12.4513
		1247	4.79361	16.7714	-11.9777		1247	61.2054	55.0513	6.15415
		1248	25.6059	16.7714	8.83454		1248	57.282	55.0513	2.23066
		1249	3.22853	16.7714	-13.5428		1249	56.364	55.0513	1.31272
		1250	20.9403	16.7714	4.16893		1250	66.4909	55.0513	11.4396
		1251	9.37224	16.7714	-7.39911		1251	65.2914	55.0513	10.2401
		1252	8.35956	16.7714	-8.41179		1252	60.7103	55.0513	5.65895
		1253	21.4913	16.7714	4.71994		1253	71.034	55.0513	15.9827
		1254	14.8824	16.7714	-1.8889		1254	55.4857	55.0513	0.4344
		1255	7.13301	16.7714	-9.63834		1255	59.1916	55.0513	4.14029
		1256	11.6459	16.7714	-5.12541		1256	64.7108	55.0513	9.65946
		1257	20.2284	16.7714	3.45705		1257	51.4605	55.0513	-3.59084
		1258	9.62057	16.7714	-7.15078		1258	55.1978	55.0513	0.14651
		1259	15.6157	16.7714	-1.15564		1259	45.5577	55.0513	-9.49361
		1260	15.9075	16.7714	-0.86383		1260	53.5511	55.0513	-1.50019
		1261	13.7585	16.7714	-3.01285		1261	51.8026	55.0513	-3.24873
		1262	10.6858	16.7714	-6.08558		1262	54.1331	55.0513	-0.91824
		1263	19.0195	16.7714	2.24816		1263	53.226	55.0513	-1.82526
		1264	20.4864	16.7714	3.71505		1264	52.3752	55.0513	-2.67612
		1265	24.535	16.7714	7.76363		1265	48.8892	55.0513	-6.16214
		1266	11.0895	16.7714	-5.68184		1266	52.3858	55.0513	-2.66545
		1267	13.5009	16.7714	-3.27041		1267	55.2535	55.0513	0.20224
		1268	11.3638	16.7714	-5.40751		1268	49.2482	55.0513	-5.8031
		1269	16.3272	16.7714	-0.44416		1269	49.0131	55.0513	-6.03824
		1270	25.8395	16.7714	9.06813		1270	51.5571	55.0513	-3.49416
		1271	24.4677	16.7714	7.69637		1271	54.2081	55.0513	-0.84325
		1272	23.034	16.7714	6.26269		1272	49.2549	55.0513	-5.79636
		1273	9.25995	16.7714	-7.51139		1273	53.2822	55.0513	-1.76907
		1274	19.107	16.7714	2.33566		1274	51.2283	55.0513	-3.82295
		1275	18.5194	16.7714	1.74808		1275	34.471	35.4776	-1.0066
		1276	18.4806	16.7714	1.70926		1276	40.1961	35.4776	4.71846
		1277	21.2003	16.7714	4.42895		1277	55.4324	35.4776	19.9548
		1278	15.7219	16.7714	-1.04939		1278	38.6353	35.4776	3.15771
		1279	11.0948	16.7714	-5.67656		1279	40.7643	35.4776	5.28667
		1280	16.2362	16.7714	-0.53515		1280	39.0263	35.4776	3.54872
		1281	24.1289	16.7714	7.35757		1281	50.3939	55.0513	-4.65738
		1282	19.9677	16.7714	3.19638		1282	53.7227	55.0513	-1.32855
		1283	21.2564	16.7714	4.48508		1283	54.5139	55.0513	-0.53739
		1284	15.1468	16.7714	-1.6245		1284	52.873	55.0513	-2.17829
		1285	15.2242	16.7714	-1.54709		1285	56.0854	55.0513	1.03413
		1286	4.44865	16.7714	-12.3227		1286	50.6928	55.0513	-4.35851
		1287	22.9547	16.7714	6.18334		1287	65.0488	65.849	-0.8002
		1288	18.198	16.7714	1.4267		1288	62.9297	65.849	-2.91936
		1289	5.81561	16.7714	-10.9557		1289	66.1266	65.849	0.27761
		1290	20.2864	16.7714	3.51505		1290	69.5614	65.849	3.71242
		1291	14.3864	16.7714	-2.38498		1291	70.4213	65.849	4.57227
		1292	18.2574	16.7714	1.48608		1292	72.7968	65.849	6.94778
		1293	15.6597	16.7714	-1.11168		1293	71.1948	65.849	5.34582
		1294	15.3686	16.7714	-1.40276		1294	68.7214	65.849	2.87241
		1295	20.6787	16.7714	3.90738		1295	68.2066	65.849	2.35757
		1296	6.26506	16.7714	-10.5063		1296	53.9691	65.849	-11.8799
		1297	19.1412	16.7714	2.36988		1297	68.9256	65.849	3.07653
		1298	17.6397	16.7714	0.86837		1298	66.6088	65.849	0.75973
		1299	1.61697	16.7714	-15.1544		1299	66.6244	65.849	0.77542
		1300	14.0679	16.7714	-2.70344		1300	67.199	65.849	1.34997
		1301	15.1951	16.7714	-1.5763		1301	68.4853	65.849	2.6363
		1302	23.7205	16.7714	6.94918		1302	69.994	65.849	4.14495
		1303	22.5393	16.7714	5.76792		1303	57.4342	65.849	-8.41477
		1304	17.2487	16.7714	0.4773		1304	67.2439	65.849	1.39486
		1305	18.3567	16.7714	1.58536		1305	61.9091	65.849	-3.93997
		1306	19.5654	16.7714	2.7941		1306	67.6974	65.849	1.84839
		1307	21.0128	16.7714	4.24141		1307	57.6574	55.0513	2.6061
		1308	8.36704	16.7714	-8.4043		1308	56.9838	55.0513	1.93248
		1309	26.5256	16.7714	9.75426		1309	59.6657	55.0513	4.61437
		1310	12.0156	16.7714	-4.75572		1310	54.0977	55.0513	-0.95363
		1311	10.3865	16.7714	-6.38483		1311	59.31	55.0513	4.25868
		1312	16.5075	16.7714	-0.26382		1312	59.0401	55.0513	3.98881
		1313	18.691	16.7714	1.91962		1313	56.5369	55.0513	1.4856
		1314	22.0953	16.7714	5.32397		1314	59.0454	55.0513	3.99406
		1315	20.2405	16.7714	3.46914		1315	54.7835	55.0513	-0.26782
		1316	26.6703	16.7714	9.89891		1316	58.0244	55.0513	2.97312
		1317	17.8782	16.7714	1.10685		1317	55.3411	55.0513	0.2898
		1318	14.7544	16.7714	-2.01699		1318	50.3725	55.0513	-4.67883
		1319	16.3254	16.7714	-0.44596		1319	53.6537	55.0513	-1.39758
		1320	23.0984	16.7714	6.3271		1320	53.4975	55.0513	-1.55384
		1321	18.6435	16.7714	1.87213		1321	52.7807	55.0513	-2.27062
		1322	23.6152	16.7714	6.84386		1322	58.1061	55.0513	3.05477
		1323	17.5377	16.7714	0.76636		1323	56.6151	55.0513	1.56384
		1324	22.1131	16.7714	5.34174		1324	54.8787	55.0513	-0.17261
		1325	6.14949	16.7714	-10.6219		1325	32.9371	35.4776	-2.54047
		1326	17.728	16.7714	0.9567		1326	42.9617	35.4776	7.48413
		1327	15.442	16.7714	-1.32937		1327	34.3543	35.4776	-1.12331
		1328	9.59599	16.7714	-7.17535		1328	50.9558	55.0513	-4.09554
		1329	11.6607	16.7714	-5.11063		1329	54.4746	55.0513	-0.57672
		1330	13.0794	16.7714	-3.69193		1330	52.5117	55.0513	-2.53957
		1331	17.489	16.7714	0.71767		1331	56.0068	55.0513	0.95549
		1332	4.71043	16.7714	-12.0609		1332	52.5127	55.0513	-2.53864
		1333	11.1787	16.7714	-5.59262		1333	55.0239	55.0513	-0.02746
		1334	14.2113	16.7714	-2.56004		1334	50.0551	55.0513	-4.99622
		1335	16.6124	16.7714	-0.15894		1335	54.6225	55.0513	-0.42886
		1336	24.9853	16.7714	8.21395		1336	55.0166	55.0513	-0.03468
		1337	15.0304	16.7714	-1.74093		1337	50.4503	55.0513	-4.60097
		1338	17.008	16.7714	0.23666		1338	53.411	55.0513	-1.64032
		1339	3.3459	16.7714	-13.4254		1339	64.0406	55.0513	8.98928
		1340	7.42741	16.7714	-9.34393		1340	50.9918	55.0513	-4.05945
		1341	21.3384	16.7714	4.56702		1341	61.6705	55.0513	6.61924
		1342	7.83056	16.7714	-8.94078		1342	57.4071	55.0513	2.35576
		1343	14.8067	16.7714	-1.96465		1343	55.5284	55.0513	0.47706
		1344	22.6204	16.7714	5.84909		1344	57.6912	55.0513	2.63987
		1345	23.4173	16.7714	6.64592		1345	58.3032	55.0513	3.25192
		1346	23.6828	16.7714	6.91147		1346	59.68	55.0513	4.62865
		1347	18.1857	16.7714	1.41432		1347	64.3727	55.0513	9.32145
		1348	10.0095	16.7714	-6.76187		1348	62.702	55.0513	7.65066
		1349	7.77986	16.7714	-8.99149		1349	58.7669	55.0513	3.71559
		1350	14.4857	16.7714	-2.28561		1350	57.7477	55.0513	2.69644
		1351	23.5308	16.7714	6.75947		1351	61.5607	55.0513	6.50936
		1352	19.9858	16.7714	3.21447		1352	57.9408	55.0513	2.88948
		1353	6.73067	16.7714	-10.0407		1353	59.3401	55.0513	4.28879
		1354	25.7812	16.7714	9.00981		1354	50.5277	55.0513	-4.52366
		1355	17.5781	16.7714	0.80674		1355	60.4089	55.0513	5.35756
		1356	19.8246	16.7714	3.05321		1356	55.5532	55.0513	0.50187
		1357	13.6591	16.7714	-3.11227		1357	56.9086	55.0513	1.85732
		1358	16.2984	16.7714	-0.47292		1358	55.3466	55.0513	0.29534
		1359	12.2224	16.7714	-4.54892		1359	58.2198	55.0513	3.16853
		1360	21.3593	16.7714	4.588		1360	59.3358	55.0513	4.28453
		1361	18.5347	16.7714	1.76332		1361	61.1354	55.0513	6.08415
		1362	19.8745	16.7714	3.10316		1362	58.3134	55.0513	3.26207
		1363	23.4265	16.7714	6.65517		1363	57.8015	55.0513	2.75015
		1364	18.0614	16.7714	1.29008		1364	58.451	55.0513	3.39972
		1365	12.536	16.7714	-4.23537		1365	60.4437	55.0513	5.39244
		1366	20.98	16.7714	4.20866		1366	62.2458	55.0513	7.19455
		1367	24.2419	16.7714	7.47053		1367	57.0348	55.0513	1.98354
		1368	15.387	16.7714	-1.38435		1368	62.7152	55.0513	7.66387
		1369	0.85964	16.7714	-15.9117		1369	56.0171	55.0513	0.96578
		1370	16.8772	16.7714	0.10585		1370	57.8636	55.0513	2.81235
		1371	9.71118	16.7714	-7.06017		1371	56.0754	55.0513	1.02406
		1372	26.6033	16.7714	9.83191		1372	58.7755	55.0513	3.72416
		1373	19.3136	16.7714	2.54222		1373	58.9321	55.0513	3.88078
		1374	14.9071	16.7714	-1.86422		1374	55.9954	55.0513	0.94411
		1375	23.5534	16.7714	6.78204		1375	57.0036	55.0513	1.95225
		1376	21.3253	16.7714	4.55392		1376	58.6945	55.0513	3.64325
		1377	26.9186	16.7714	10.1473		1377	56.5861	55.0513	1.5348
		1378	25.755	16.7714	8.98365		1378	56.2515	55.0513	1.20024
		1379	22.9946	16.7714	6.22321		1379	53.3449	55.0513	-1.70645
		1380	11.8468	16.7714	-4.9245		1380	57.5954	55.0513	2.54414
		1381	24.9053	16.7714	8.13393		1381	58.3176	55.0513	3.26634
		1382	24.9758	16.7714	8.2045		1382	59.4136	55.0513	4.36232
		1383	12.4717	16.7714	-4.29961		1383	58.7379	55.0513	3.68661
		1384	17.2672	16.7714	0.49582		1384	60.8688	55.0513	5.81753
		1385	18.5951	16.7714	1.82378		1385	60.1204	55.0513	5.06909
		1386	18.6079	16.7714	1.83656		1386	56.5038	55.0513	1.45252
		1387	9.1935	16.7714	-7.57784		1387	56.49	55.0513	1.43865
		1388	17.5539	16.7714	0.78251		1388	59.4673	55.0513	4.41595
		1389	17.6068	16.7714	0.83549		1389	60.3129	55.0513	5.26163
		1390	20.0159	16.7714	3.2446		1390	56.9559	55.0513	1.90463
		1391	28.0283	16.7714	11.2569		1391	58.8974	55.0513	3.84609
		1392	19.6188	16.7714	2.84746		1392	61.966	55.0513	6.91469
		1393	8.45506	16.7714	-8.31629		1393	57.2141	55.0513	2.16274
		1394	21.8114	16.7714	5.04006		1394	59.9902	55.0513	4.93889
		1395	13.9776	16.7714	-2.79374		1395	55.7663	55.0513	0.71502
		1396	17.184	16.7714	0.41265		1396	61.1253	55.0513	6.07401
		1397	25.6919	16.7714	8.92059		1397	58.3214	55.0513	3.27009
		1398	13.0609	16.7714	-3.71042		1398	62.9352	55.0513	7.88389
		1399	16.4384	16.7714	-0.33292		1399	57.7755	55.0513	2.72417
		1400	16.5552	16.7714	-0.21613		1400	59.7638	55.0513	4.71254
		1401	26.8601	16.7714	10.0887		1401	56.4978	55.0513	1.44652
		1402	15.7643	16.7714	-1.00705		1402	56.0905	55.0513	1.03922
		1403	21.0048	16.7714	4.23343		1403	54.111	55.0513	-0.9403
		1404	19.9401	16.7714	3.16877		1404	60.057	55.0513	5.00565
		1405	26.9288	16.7714	10.1575		1405	58.5283	55.0513	3.47703
		1406	19.6106	16.7714	2.83921		1406	52.5073	55.0513	-2.54402
		1407	13.7831	16.7714	-2.9882		1407	54.1089	55.0513	-0.94239
		1408	23.7487	16.7714	6.97735		1408	54.9141	55.0513	-0.13723
		1409	11.7623	16.7714	-5.00908		1409	56.1804	55.0513	1.12912
		1410	16.029	16.7714	-0.74239		1410	56.0636	55.0513	1.0123
		1411	22.9106	16.7714	6.13925		1411	54.6443	55.0513	-0.40698
		1412	14.3887	16.7714	-2.38265		1412	55.4276	55.0513	0.37627
		1413	19.2979	16.7714	2.52657		1413	57.3449	55.0513	2.29359
		1414	16.9404	16.7714	0.16902		1414	55.1477	55.0513	0.09641
		1415	7.71127	16.7714	-9.06007		1415	59.3436	55.0513	4.29229
		1416	24.3255	16.7714	7.55416		1416	56.8067	55.0513	1.7554
		1417	19.2265	16.7714	2.45512		1417	62.9061	55.0513	7.85475
		1418	10.7658	16.7714	-6.00556		1418	61.7869	55.0513	6.73559
		1419	8.01792	16.7714	-8.75342		1419	56.1886	55.0513	1.13733
		1420	18.3165	16.7714	1.54517		1420	61.8712	65.849	-3.97781
		1421	23.5558	16.7714	6.78449		1421	66.8813	65.849	1.03224
		1422	14.3565	16.7714	-2.41484		1422	61.1335	65.849	-4.71553
		1423	8.37489	16.7714	-8.39645		1423	66.1723	65.849	0.32325
		1424	8.05465	16.7714	-8.71669		1424	62.7805	65.849	-3.06852
		1425	12.2957	16.7714	-4.47568		1425	62.6635	65.849	-3.18555
		1426	22.4688	16.7714	5.69743		1426	62.176	65.849	-3.67302
		1427	15.0143	16.7714	-1.75702		1427	65.0079	65.849	-0.84111
		1428	18.8123	16.7714	2.04094		1428	60.3303	55.0513	5.27897
		1429	13.1826	16.7714	-3.58879		1429	56.0346	55.0513	0.98333
		1430	12.4404	16.7714	-4.33095		1430	57.823	55.0513	2.77171
		1431	23.5013	16.7714	6.72995		1431	57.1858	55.0513	2.13447
		1432	14.1886	16.7714	-2.58275		1432	57.5555	55.0513	2.50423
		1433	14.3444	16.7714	-2.42697		1433	53.605	55.0513	-1.44632
		1434	22.2308	16.7714	5.45947		1434	59.0691	55.0513	4.01783
		1435	11.4985	16.7714	-5.27285		1435	58.9243	55.0513	3.87296
		1436	3.69573	16.7714	-13.0756		1436	60.1398	55.0513	5.08854
		1437	23.5339	16.7714	6.76253		1437	58.5143	55.0513	3.46304
		1438	1.95291	16.7714	-14.8184		1438	59.4288	55.0513	4.37752
		1439	17.5595	16.7714	0.78817		1439	57.5371	55.0513	2.48574
		1440	13.615	16.7714	-3.15639		1440	55.8174	55.0513	0.76609
		1441	13.6865	16.7714	-3.08483		1441	55.9819	55.0513	0.93057
		1442	27.1597	16.7714	10.3884		1442	55.5423	55.0513	0.49104
		1443	13.5069	16.7714	-3.26447		1443	60.7965	55.0513	5.74515
		1444	26.8197	16.7714	10.0483		1444	57.5109	55.0513	2.45962
		1445	20.5412	16.7714	3.76985		1445	50.1539	55.0513	-4.89737
		1446	12.7779	16.7714	-3.99342		1446	52.4313	55.0513	-2.61997
		1447	5.40542	16.7714	-11.3659		1447	53.8454	55.0513	-1.20592
		1448	16.6289	16.7714	-0.14246		1448	55.0114	55.0513	-0.03994
		1449	19.4865	16.7714	2.71511		1449	50.864	55.0513	-4.18726
		1450	21.0656	16.7714	4.29422		1450	62.6804	55.0513	7.6291
		1451	18.1333	16.7714	1.36195		1451	52.625	55.0513	-2.42631
		1452	7.54601	16.7714	-9.22534		1452	59.9627	55.0513	4.91139
		1453	12.7177	16.7714	-4.05366		1453	55.0853	55.0513	0.03395
		1454	21.369	16.7714	4.59768		1454	55.7449	55.0513	0.69363
		1455	3.14787	16.7714	-13.6235		1455	61.1074	55.0513	6.05606
		1456	14.3638	16.7714	-2.40755		1456	60.8097	55.0513	5.75841
		1457	9.05442	16.7714	-7.71692		1457	63.4793	55.0513	8.42796
		1458	17.6895	16.7714	0.91814		1458	57.505	55.0513	2.45369
		1459	12.4026	16.7714	-4.36877		1459	62.0075	55.0513	6.95618
		1460	15.7643	16.7714	-1.00704		1460	56.5214	55.0513	1.47008
		1461	18.1374	16.7714	1.36605		1461	58.8842	55.0513	3.83292
		1462	2.92353	16.7714	-13.8478		1462	60.6671	55.0513	5.61575
		1463	13.2386	16.7714	-3.53279		1463	62.557	55.0513	7.50575
		1464	22.4362	16.7714	5.66484		1464	53.5111	55.0513	-1.54019
		1465	15.9501	16.7714	-0.82122		1465	63.8556	55.0513	8.80435
		1466	17.8129	16.7714	1.0415		1466	57.059	55.0513	2.0077
		1467	18.5386	16.7714	1.7673		1467	63.8789	55.0513	8.82762
		1468	2.32559	16.7714	-14.4458		1468	53.0012	55.0513	-2.05007
		1469	18.2879	16.7714	1.51654		1469	56.2079	55.0513	1.15657
		1470	11.1575	16.7714	-5.61387		1470	55.925	55.0513	0.87371
		1471	15.2621	16.7714	-1.50929		1471	60.1582	55.0513	5.1069
		1472	9.71132	16.7714	-7.06002		1472	57.9553	55.0513	2.90402
		1473	8.45533	16.7714	-8.31602		1473	58.3744	55.0513	3.32309
		1474	17.8668	16.7714	1.09545		1474	60.9761	55.0513	5.92475
		1475	14.6319	16.7714	-2.13939		1475	61.9906	55.0513	6.93932
		1476	12.4196	16.7714	-4.35173		1476	56.2555	55.0513	1.20417
		1477	14.424	16.7714	-2.34735		1477	60.9918	55.0513	5.94046
		1478	16.9545	16.7714	0.18313		1478	58.9151	55.0513	3.86382
		1479	16.021	16.7714	-0.75033		1479	63.5404	55.0513	8.48912
		1480	18.7099	16.7714	1.93856		1480	64.432	55.0513	9.38073
		1481	16.4391	16.7714	-0.3323		1481	63.0496	55.0513	7.99835
		1482	22.3476	16.7714	5.57628		1482	62.5426	55.0513	7.4913
		1483	22.4225	16.7714	5.65119		1483	60.7285	55.0513	5.67723
		1484	25.7722	16.7714	9.00085		1484	59.7572	55.0513	4.70585
		1485	16.4262	16.7714	-0.3451		1485	58.8438	55.0513	3.79247
		1486	24.0243	16.7714	7.25298		1486	60.9544	55.0513	5.90308
		1487	17.759	16.7714	0.98761		1487	54.5934	55.0513	-0.45792
		1488	20.0438	16.7714	3.27242		1488	60.2921	55.0513	5.24083
		1489	15.7174	16.7714	-1.05395		1489	55.4599	55.0513	0.40863
		1490	12.808	16.7714	-3.96331		1490	59.5579	55.0513	4.50662
		1491	8.5794	16.7714	-8.19195		1491	61.9551	55.0513	6.90379
		1492	19.4438	16.7714	2.6725		1492	62.5267	55.0513	7.47545
		1493	14.5722	16.7714	-2.19911		1493	61.0897	55.0513	6.03843
		1494	17.7321	16.7714	0.96072		1494	60.9694	55.0513	5.91807
		1495	22.0012	16.7714	5.22988		1495	55.1605	55.0513	0.10918
		1496	15.4637	16.7714	-1.30762		1496	56.9817	55.0513	1.93035
		1497	4.5124	16.7714	-12.259		1497	58.0519	55.0513	3.00061
		1498	15.7537	16.7714	-1.01767		1498	62.4125	55.0513	7.36119
		1499	7.83294	16.7714	-8.9384		1499	56.7198	55.0513	1.66846
		1500	19.4524	16.7714	2.68107		1500	60.4016	55.0513	5.35031
		1501	20.0937	16.7714	3.32234		1501	65.1602	55.0513	10.1089
		1502	22.6409	16.7714	5.86953		1502	58.7507	55.0513	3.69935
		1503	22.0667	16.7714	5.29533		1503	63.0925	55.0513	8.04117
		1504	27.9069	16.7714	11.1356		1504	61.1683	55.0513	6.11698
		1505	21.2526	16.7714	4.48128		1505	55.4068	55.0513	0.35555
		1506	21.0478	16.7714	4.27649		1506	61.6023	55.0513	6.551
		1507	17.7071	16.7714	0.93573		1507	61.2297	55.0513	6.17843
		1508	16.5679	16.7714	-0.20345		1508	61.4421	55.0513	6.39083
		1509	16.2356	16.7714	-0.53577		1509	60.8213	55.0513	5.76998
		1510	15.8987	16.7714	-0.87268		1510	55.724	55.0513	0.67268
		1511	21.2766	16.7714	4.50522		1511	57.2459	55.0513	2.19464
		1512	21.5456	16.7714	4.77429		1512	55.4564	55.0513	0.40509
		1513	19.6749	16.7714	2.90355		1513	61.1639	55.0513	6.11264
		1514	15.956	16.7714	-0.81534		1514	55.4989	55.0513	0.44761
		1515	20.6086	16.7714	3.83722		1515	63.5866	55.0513	8.53528
		1516	17.6613	16.7714	0.88991		1516	52.45	55.0513	-2.60133
		1517	13.7075	16.7714	-3.06387		1517	55.7159	55.0513	0.6646
		1518	21.0051	16.7714	4.23379		1518	62.7935	55.0513	7.74219
		1519	16.2991	16.7714	-0.47229		1519	57.5187	55.0513	2.46741
		1520	17.297	16.7714	0.52569		1520	57.1901	55.0513	2.13882
		1521	15.3232	16.7714	-1.44816		1521	59.9042	55.0513	4.85288
		1522	9.74097	16.7714	-7.03038		1522	61.0606	55.0513	6.00926
		1523	12.6752	16.7714	-4.09617		1523	59.1845	55.0513	4.13318
		1524	12.5319	16.7714	-4.23947		1524	58.4962	55.0513	3.44488
		1525	11.5882	16.7714	-5.18319		1525	58.9038	55.0513	3.85253
		1526	19.854	16.7714	3.08262		1526	63.7868	55.0513	8.73546
		1527	6.0849	16.7714	-10.6865		1527	57.5824	55.0513	2.53109
		1528	22.951	16.7714	6.17967		1528	62.3544	55.0513	7.30308
		1529	10.3108	16.7714	-6.46054		1529	60.9766	55.0513	5.92527
		1530	19.703	16.7714	2.93168		1530	57.4627	55.0513	2.41138
		1531	18.2868	16.7714	1.51542		1531	60.1247	55.0513	5.07341
		1532	9.10424	16.7714	-7.66711		1532	66.2927	55.0513	11.2414
		1533	18.6889	16.7714	1.91754		1533	57.3051	55.0513	2.25385
		1534	19.9211	16.7714	3.14971		1534	63.5282	55.0513	8.47687
		1535	17.9585	16.7714	1.18716		1535	57.9071	55.0513	2.85576
		1536	15.1082	16.7714	-1.66318		1536	59.2046	55.0513	4.15334
		1537	21.9328	16.7714	5.16151		1537	59.4727	55.0513	4.42144
		1538	19.1712	16.7714	2.39987		1538	57.511	55.0513	2.45973
		1539	4.87036	16.7714	-11.901		1539	60.1443	55.0513	5.09297
		1540	20.411	16.7714	3.63967		1540	56.4209	55.0513	1.3696
		1541	2.11778	16.7714	-14.6536		1541	60.8799	55.0513	5.82855
		1542	14.033	16.7714	-2.7383		1542	60.1909	55.0513	5.13962
		1543	21.5753	16.7714	4.80398		1543	55.2283	55.0513	0.17704
		1544	20.9836	16.7714	4.21224		1544	58.0061	55.0513	2.95476
		1545	24.6388	16.7714	7.86748		1545	60.6458	55.0513	5.59454
		1546	21.6349	16.7714	4.8636		1546	60.0501	55.0513	4.9988
		1547	13.3266	16.7714	-3.44475		1547	54.0776	55.0513	-0.97372
		1548	20.9826	16.7714	4.21126		1548	60.7472	55.0513	5.69593
		1549	17.171	16.7714	0.39964		1549	59.9559	55.0513	4.90459
		1550	6.67475	16.7714	-10.0966		1550	55.3886	55.0513	0.33724
		1551	19.673	16.7714	2.90171		1551	56.3867	55.0513	1.33539
		1552	11.9011	16.7714	-4.87021		1552	58.8314	55.0513	3.78005
		1553	18.5859	16.7714	1.81454		1553	57.1434	55.0513	2.09208
		1554	8.01933	16.7714	-8.75202		1554	56.2266	55.0513	1.17525
		1555	21.8004	16.7714	5.02904		1555	59.2068	55.0513	4.15547
		1556	14.4633	16.7714	-2.30807		1556	56.9381	55.0513	1.88678
		1557	19.365	16.7714	2.59361		1557	62.4374	55.0513	7.38604
		1558	7.23485	16.7714	-9.5365		1558	54.598	55.0513	-0.45326
		1559	22.1034	16.7714	5.33205		1559	53.2398	55.0513	-1.8115
		1560	20.6173	16.7714	3.84592		1560	58.3429	55.0513	3.29159
		1561	12.3878	16.7714	-4.38358		1561	56.1776	55.0513	1.12634
		1562	10.7469	16.7714	-6.02443		1562	60.1408	55.0513	5.08949
		1563	10.8118	16.7714	-5.9595		1563	53.1847	55.0513	-1.86661
		1564	15.9306	16.7714	-0.84077		1564	48.1635	55.0513	-6.88782
		1565	26.0542	16.7714	9.28282		1565	53.0613	55.0513	-1.99005
		1566	15.3979	16.7714	-1.37345		1566	49.6184	55.0513	-5.43288
		1567	16.7376	16.7714	-0.03369		1567	48.0701	55.0513	-6.98123
		1568	21.4903	16.7714	4.71898		1568	55.1957	55.0513	0.14444
		1569	21.7926	16.7714	5.02125		1569	59.3907	55.0513	4.33943
		1570	7.58305	16.7714	-9.1883		1570	50.7689	55.0513	-4.28239
		1571	13.6372	16.7714	-3.13417		1571	53.4495	55.0513	-1.60179
		1572	22.042	16.7714	5.27063		1572	59.4627	55.0513	4.41144
		1573	21.1354	16.7714	4.36409		1573	50.3666	55.0513	-4.68471
		1574	18.0726	16.7714	1.3013		1574	53.8133	55.0513	-1.23801
		1575	14.8611	16.7714	-1.91026		1575	49.1153	55.0513	-5.93601
		1576	12.2516	16.7714	-4.51978		1576	56.0241	55.0513	0.97281
		1577	13.5678	16.7714	-3.20356		1577	52.7673	55.0513	-2.28402
		1578	20.317	16.7714	3.54569		1578	53.2139	55.0513	-1.83743
		1579	13.4364	16.7714	-3.3349		1579	58.8685	55.0513	3.8172
		1580	21.8186	16.7714	5.04726		1580	54.9009	55.0513	-0.1504
		1581	24.6175	16.7714	7.84611		1581	49.3756	55.0513	-5.67569
		1582	19.7758	16.7714	3.00448		1582	54.8657	55.0513	-0.1856
		1583	16.4525	16.7714	-0.31887		1583	66.183	55.0513	11.1317
		1584	14.3287	16.7714	-2.44268		1584	63.1585	55.0513	8.10715
		1585	22.4022	16.7714	5.63081		1585	56.5374	55.0513	1.48614
		1586	12.7983	16.7714	-3.97303		1586	64.9851	55.0513	9.93383
		1587	12.4245	16.7714	-4.34689		1587	56.7642	55.0513	1.71291
		1588	14.3055	16.7714	-2.46581		1588	52.0872	55.0513	-2.96415
		1589	24.777	16.7714	8.00562		1589	47.5089	55.0513	-7.54235
		1590	17.1079	16.7714	0.33657		1590	56.5643	55.0513	1.51305
		1591	16.6891	16.7714	-0.08223		1591	58.3674	55.0513	3.31615
		1592	16.4289	16.7714	-0.34247		1592	77.7485	65.849	11.8994
		1593	5.99939	16.7714	-10.772		1593	67.7969	65.849	1.94784
		1594	21.0232	16.7714	4.2518		1594	57.2342	65.849	-8.61483
		1595	16.6165	16.7714	-0.15484		1595	70.357	65.849	4.50798
		1596	16.5229	16.7714	-0.24841		1596	71.1863	65.849	5.33723
		1597	19.9206	16.7714	3.14927		1597	64.6571	65.849	-1.19193
		1598	17.3599	16.7714	0.58859		1598	61.6232	65.849	-4.22587
		1599	25.3159	16.7714	8.54457		1599	67.6902	65.849	1.84116
		1600	15.1201	16.7714	-1.65127		1600	58.3878	65.849	-7.46123
		1601	21.5145	16.7714	4.74317		1601	58.5886	65.849	-7.26041
		1602	14.9921	16.7714	-1.77928		1602	71.0461	65.849	5.19713
		1603	17.6572	16.7714	0.88588		1603	65.6001	65.849	-0.2489
		1604	23.6845	16.7714	6.91314		1604	58.4547	65.849	-7.39427
		1605	17.0051	16.7714	0.23372		1605	65.5385	65.849	-0.31054
		1606	17.406	16.7714	0.63464		1606	68.2447	65.849	2.3957
		1607	18.737	16.7714	1.96571		1607	73.1239	65.849	7.27484
		1608	14.8733	16.7714	-1.89801		1608	71.1368	65.849	5.28776
		1609	14.968	16.7714	-1.80334		1609	57.8944	55.0513	2.84307
		1610	15.1214	16.7714	-1.64991		1610	61.1287	55.0513	6.07737
		1611	6.6382	16.7714	-10.1332		1611	53.3736	55.0513	-1.67766
		1612	19.8899	16.7714	3.11859		1612	53.3051	55.0513	-1.74622
		1613	4.77163	16.7714	-11.9997		1613	50.9945	55.0513	-4.05675
		1614	8.15332	16.7714	-8.61802		1614	51.9164	55.0513	-3.13488
		1615	17.9874	16.7714	1.21608		1615	51.7399	55.0513	-3.31138
		1616	19.0436	16.7714	2.27226		1616	67.4888	55.0513	12.4375
		1617	14.4895	16.7714	-2.28181		1617	65.9404	55.0513	10.8891
		1618	22.5132	16.7714	5.74186		1618	55.4597	55.0513	0.40844
		1619	16.545	16.7714	-0.22633		1619	49.2789	55.0513	-5.77244
		1620	17.4159	16.7714	0.64457		1620	48.8426	55.0513	-6.2087
		1621	20.7851	16.7714	4.01376		1621	62.5226	55.0513	7.47134
		1622	19.2352	16.7714	2.4638		1622	56.495	55.0513	1.44372
		1623	19.219	16.7714	2.44766		1623	62.7555	55.0513	7.70422
		1624	17.8114	16.7714	1.04005		1624	63.0718	55.0513	8.02044
		1625	15.7584	16.7714	-1.0129		1625	54.1508	55.0513	-0.90047
		1626	15.0763	16.7714	-1.69509		1626	54.868	55.0513	-0.18336
		1627	17.2028	16.7714	0.43149		1627	63.8064	55.0513	8.75515
		1628	21.8881	16.7714	5.11681		1628	50.5255	55.0513	-4.52584
		1629	21.9822	16.7714	5.21088		1629	51.5659	55.0513	-3.4854
		1630	7.49478	16.7714	-9.27656		1630	54.813	55.0513	-0.23827
		1631	18.7767	16.7714	2.0053		1631	51.5791	55.0513	-3.47224
		1632	9.10297	16.7714	-7.66838		1632	51.9158	55.0513	-3.13554
		1633	23.3353	16.7714	6.56394		1633	51.9558	55.0513	-3.09554
		1634	14.8427	16.7714	-1.92869		1634	64.3677	55.0513	9.31635
		1635	13.4427	16.7714	-3.32861		1635	54.9224	55.0513	-0.12894
		1636	10.8711	16.7714	-5.90023		1636	54.4655	55.0513	-0.5858
		1637	15.6189	16.7714	-1.15246		1637	60.7308	55.0513	5.67954
		1638	11.3833	16.7714	-5.38806		1638	65.6002	55.0513	10.5489
		1639	16.8733	16.7714	0.10194		1639	55.2445	55.0513	0.19318
		1640	16.383	16.7714	-0.38838		1640	57.6367	55.0513	2.58536
		1641	4.20072	16.7714	-12.5706		1641	52.3774	55.0513	-2.67392
		1642	4.14374	16.7714	-12.6276		1642	67.2464	55.0513	12.1951
		1643	19.2185	16.7714	2.44711		1643	58.6123	55.0513	3.56102
		1644	18.3731	16.7714	1.60175		1644	57.4997	55.0513	2.4484
		1645	20.0292	16.7714	3.25781		1645	56.6548	55.0513	1.6035
		1646	19.0433	16.7714	2.27196		1646	58.7828	55.0513	3.73145
		1647	8.8197	16.7714	-7.95165		1647	57.7825	55.0513	2.7312
		1648	15.1894	16.7714	-1.58198		1648	54.0238	55.0513	-1.02749
		1649	14.4447	16.7714	-2.32661		1649	58.8572	55.0513	3.80592
		1650	15.2078	16.7714	-1.56354		1650	57.6626	55.0513	2.61131
		1651	15.9319	16.7714	-0.83949		1651	57.6314	55.0513	2.58012
		1652	12.0857	16.7714	-4.68566		1652	61.4519	55.0513	6.40062
		1653	24.5401	16.7714	7.76871		1653	56.6185	55.0513	1.56719
		1654	16.7635	16.7714	-0.00784		1654	55.7364	55.0513	0.68508
		1655	25.8351	16.7714	9.06374		1655	56.7245	55.0513	1.67322
		1656	23.2494	16.7714	6.47806		1656	64.9535	55.0513	9.9022
		1657	10.9747	16.7714	-5.79666		1657	52.3772	55.0513	-2.67416
		1658	18.9614	16.7714	2.19001		1658	49.8896	55.0513	-5.16168
		1659	12.5933	16.7714	-4.17807		1659	61.8906	55.0513	6.83926
		1660	3.10108	16.7714	-13.6703		1660	56.9098	55.0513	1.85845
		1661	20.8652	16.7714	4.09383		1661	51.699	55.0513	-3.35233
		1662	12.6444	16.7714	-4.12695		1662	62.7731	55.0513	7.72178
		1663	19.561	16.7714	2.78969		1663	63.3336	55.0513	8.28233
		1664	6.79891	16.7714	-9.97243		1664	61.1535	55.0513	6.10218
		1665	13.522	16.7714	-3.24939		1665	55.4774	55.0513	0.4261
		1666	19.0582	16.7714	2.28686		1666	58.1113	55.0513	3.05996
		1667	22.7276	16.7714	5.95629		1667	57.7632	55.0513	2.71193
		1668	16.7814	16.7714	0.01009		1668	62.3323	55.0513	7.28095
		1669	4.6621	16.7714	-12.1092		1669	62.1939	55.0513	7.14264
		1670	19.064	16.7714	2.29268		1670	59.7086	55.0513	4.6573
		1671	17.1959	16.7714	0.42459		1671	62.1407	55.0513	7.08935
		1672	17.7942	16.7714	1.02284		1672	60.2008	55.0513	5.14949
		1673	19.3743	16.7714	2.60292		1673	66.1077	55.0513	11.0564
		1674	20.92	16.7714	4.14863		1674	59.2457	55.0513	4.19438
		1675	15.3022	16.7714	-1.46917		1675	60.7715	55.0513	5.72023
		1676	22.0547	16.7714	5.28333		1676	57.2832	55.0513	2.23187
		1677	14.0512	16.7714	-2.7201		1677	62.0965	55.0513	7.0452
		1678	20.1675	16.7714	3.39613		1678	62.3641	55.0513	7.31282
		1679	26.2928	16.7714	9.52148		1679	62.2024	55.0513	7.15113
		1680	12.987	16.7714	-3.78435		1680	59.8734	55.0513	4.82213
		1681	15.724	16.7714	-1.04736		1681	60.5263	55.0513	5.47496
		1682	20.8563	16.7714	4.08498		1682	63.0069	55.0513	7.95559
		1683	24.7391	16.7714	7.96773		1683	63.5935	55.0513	8.54222
		1684	11.2047	16.7714	-5.56662		1684	58.2111	55.0513	3.15975
		1685	18.006	16.7714	1.23462		1685	57.8665	55.0513	2.81519
		1686	21.976	16.7714	5.20469		1686	56.6312	55.0513	1.5799
		1687	19.1278	16.7714	2.3565		1687	52.634	55.0513	-2.41734
		1688	14.4722	16.7714	-2.29911		1688	52.2776	55.0513	-2.77374
		1689	25.2788	16.7714	8.50747		1689	54.5099	55.0513	-0.54143
		1690	21.2301	16.7714	4.45873		1690	58.4704	55.0513	3.41914
		1691	20.1099	16.7714	3.33854		1691	55.502	55.0513	0.45066
		1692	24.9032	16.7714	8.13185		1692	57.3968	55.0513	2.34553
		1693	19.8683	16.7714	3.09696		1693	55.7068	55.0513	0.65547
		1694	7.52217	16.7714	-9.24917		1694	57.5223	55.0513	2.47096
		1695	22.4701	16.7714	5.69871		1695	61.26	55.0513	6.20867
		1696	16.0105	16.7714	-0.7608		1696	58.7642	55.0513	3.71287
		1697	10.5787	16.7714	-6.19264		1697	61.8284	65.849	-4.02059
		1698	15.2872	16.7714	-1.48412		1698	63.1016	65.849	-2.74743
		1699	16.6368	16.7714	-0.13459		1699	61.6617	65.849	-4.18737
		1700	4.08633	16.7714	-12.685		1700	60.1251	65.849	-5.72389
		1701	18.2128	16.7714	1.44142		1701	56.9744	65.849	-8.87464
		1702	15.8227	16.7714	-0.94861		1702	63.2039	65.849	-2.6451
		1703	18.4519	16.7714	1.68058		1703	65.8109	65.849	-0.03817
		1704	24.7821	16.7714	8.0108		1704	62.3509	65.849	-3.49816
		1705	17.0312	16.7714	0.25989		1705	61.1798	65.849	-4.66925
		1706	21.7961	16.7714	5.02474		1706	64.2452	65.849	-1.60387
		1707	19.2629	16.7714	2.49154		1707	63.7826	65.849	-2.06645
		1708	8.32463	16.7714	-8.44671		1708	65.4502	65.849	-0.39884
		1709	13.3613	16.7714	-3.41002		1709	55.1541	55.0513	0.10284
		1710	21.3448	16.7714	4.57345		1710	57.4086	55.0513	2.3573
		1711	19.186	16.7714	2.41468		1711	54.9459	55.0513	-0.10542
		1712	21.2437	16.7714	4.47232		1712	62.8139	55.0513	7.76264
		1713	11.1783	16.7714	-5.59305		1713	54.9969	55.0513	-0.05437
		1714	15.9237	16.7714	-0.8477		1714	60.0247	55.0513	4.97336
		1715	21.2735	16.7714	4.50216		1715	59.5975	55.0513	4.54615
		1716	16.4378	16.7714	-0.33353		1716	61.6819	55.0513	6.63055
		1717	16.6127	16.7714	-0.15863		1717	58.5736	55.0513	3.52232
		1718	17.5657	16.7714	0.7944		1718	63.2014	55.0513	8.15006
		1719	21.2677	16.7714	4.49641		1719	62.5603	55.0513	7.50897
		1720	19.1973	16.7714	2.42595		1720	56.7452	55.0513	1.69386
		1721	9.70887	16.7714	-7.06247		1721	57.0374	55.0513	1.98607
		1722	10.7054	16.7714	-6.06596		1722	51.624	55.0513	-3.42734
		1723	23.5119	16.7714	6.74059		1723	50.5055	55.0513	-4.54578
		1724	25.434	16.7714	8.66265		1724	63.8075	55.0513	8.75623
		1725	4.47324	16.7714	-12.2981		1725	54.7896	55.0513	-0.26168
		1726	21.7927	16.7714	5.02137		1726	53.0401	55.0513	-2.01121
		1727	21.0534	16.7714	4.28201		1727	54.7185	55.0513	-0.33282
		1728	15.5415	16.7714	-1.22989		1728	55.422	55.0513	0.37068
		1729	9.55006	16.7714	-7.22128		1729	64.7332	55.0513	9.6819
		1730	15.2352	16.7714	-1.53613		1730	52.7995	55.0513	-2.2518
		1731	10.2943	16.7714	-6.47703		1731	58.8723	55.0513	3.82104
		1732	12.5486	16.7714	-4.22271		1732	56.377	55.0513	1.32575
		1733	13.8612	16.7714	-2.91017		1733	55.4809	55.0513	0.42957
		1734	20.5033	16.7714	3.73193		1734	61.6848	55.0513	6.63355
		1735	19.0547	16.7714	2.28334		1735	54.1822	55.0513	-0.86906
		1736	25.592	16.7714	8.82065		1736	62.2804	55.0513	7.22908
		1737	2.70217	16.7714	-14.0692		1737	56.8687	55.0513	1.81739
		1738	16.1084	16.7714	-0.66293		1738	60.9297	55.0513	5.87837
		1739	13.0106	16.7714	-3.7608		1739	55.1484	55.0513	0.09707
		1740	18.4581	16.7714	1.68675		1740	53.617	55.0513	-1.43428
		1741	22.8636	16.7714	6.0923		1741	59.2786	55.0513	4.2273
		1742	22.1085	16.7714	5.33717		1742	59.9066	55.0513	4.85532
		1743	9.55178	16.7714	-7.21956		1743	65.6714	55.0513	10.6201
		1744	14.6026	16.7714	-2.16875		1744	53.9263	55.0513	-1.125
		1745	5.98902	16.7714	-10.7823		1745	57.5982	55.0513	2.54693
		1746	20.265	16.7714	3.49368		1746	56.3473	55.0513	1.29596
		1747	11.2529	16.7714	-5.51841		1747	66.4384	65.849	0.58938
		1748	11.4396	16.7714	-5.33179		1748	62.462	65.849	-3.38701
		1749	20.3862	16.7714	3.61488		1749	62.1948	65.849	-3.65419
		1750	16.2119	16.7714	-0.55945		1750	66.1574	65.849	0.30835
		1751	23.7245	16.7714	6.95317		1751	66.1793	65.849	0.33028
		1752	19.972	16.7714	3.20067		1752	68.015	65.849	2.16602
		1753	3.08284	16.7714	-13.6885		1753	68.4339	65.849	2.5849
		1754	20.5968	16.7714	3.82545		1754	60.2994	65.849	-5.54965
		1755	20.953	16.7714	4.18164		1755	65.9541	65.849	0.10511
		1756	12.6658	16.7714	-4.10556		1756	57.9081	65.849	-7.94095
		1757	16.877	16.7714	0.10563		1757	66.2787	65.849	0.42972
		1758	8.08371	16.7714	-8.68763		1758	63.0328	65.849	-2.81624
		1759	21.7176	16.7714	4.9463		1759	60.1855	65.849	-5.66351
		1760	20.4157	16.7714	3.64434		1760	72.3337	65.849	6.48472
		1761	19.7041	16.7714	2.93274		1761	59.6321	65.849	-6.21691
		1762	22.6021	16.7714	5.83071		1762	68.5427	65.849	2.69371
		1763	12.2537	16.7714	-4.5177		1763	64.7448	65.849	-1.10424
		1764	21.3188	16.7714	4.54745		1764	64.4334	65.849	-1.41557
		1765	18.737	16.7714	1.96568		1765	61.4051	65.849	-4.44391
		1766	11.0941	16.7714	-5.67723		1766	58.5101	65.849	-7.33896
		1767	11.9387	16.7714	-4.83264		1767	65.6283	65.849	-0.22074
		1768	9.42146	16.7714	-7.34989		1768	68.2004	65.849	2.35133
		1769	23.8715	16.7714	7.10012		1769	69.0483	65.849	3.19933
		1770	9.52306	16.7714	-7.24829		1770	63.3826	65.849	-2.46641
		1771	16.07	16.7714	-0.70132		1771	63.3154	65.849	-2.53364
		1772	16.9249	16.7714	0.15357		1772	62.833	65.849	-3.01603
		1773	19.7608	16.7714	2.98943		1773	60.214	65.849	-5.63503
		1774	16.199	16.7714	-0.57235		1774	60.5393	65.849	-5.30972
		1775	9.71097	16.7714	-7.06038		1775	67.4518	65.849	1.60276
		1776	11.3461	16.7714	-5.42526		1776	61.1205	65.849	-4.72849
		1777	14.9003	16.7714	-1.87109		1777	66.9048	65.849	1.05573
		1778	8.87503	16.7714	-7.89631		1778	59.5032	65.849	-6.34585
		1779	19.386	16.7714	2.61466		1779	62.4888	65.849	-3.36024
		1780	17.3523	16.7714	0.58098		1780	55.9466	65.849	-9.90244
		1781	10.5566	16.7714	-6.21474		1781	64.8105	65.849	-1.03848
		1782	17.7088	16.7714	0.93746		1782	61.8416	65.849	-4.00738
		1783	9.88203	16.7714	-6.88931		1783	63.269	65.849	-2.58005
		1784	10.1058	16.7714	-6.66559		1784	65.737	65.849	-0.11205
		1785	19.43	16.7714	2.65864		1785	61.9729	65.849	-3.87614
		1786	12.4266	16.7714	-4.34478		1786	55.3441	55.0513	0.29278
		1787	9.96938	16.7714	-6.80196		1787	55.2657	55.0513	0.21436
		1788	13.1445	16.7714	-3.62682		1788	57.8073	55.0513	2.75598
		1789	22.7399	16.7714	5.96858		1789	62.9801	55.0513	7.92876
		1790	23.4709	16.7714	6.69961		1790	63.9169	55.0513	8.86557
		1791	20.0701	16.7714	3.29874		1791	58.7934	55.0513	3.74208
		1792	24.0238	16.7714	7.25244		1792	53.5658	55.0513	-1.48548
		1793	12.1576	16.7714	-4.6137		1793	51.0796	55.0513	-3.97171
		1794	11.7125	16.7714	-5.05888		1794	51.8905	55.0513	-3.1608
		1795	26.5641	16.7714	9.79278		1795	49.5091	55.0513	-5.54224
		1796	13.3575	16.7714	-3.41386		1796	67.0611	55.0513	12.0098
		1797	21.6389	16.7714	4.86759		1797	54.8597	55.0513	-0.19157
		1798	18.0547	16.7714	1.28332		1798	54.7601	55.0513	-0.29119
		1799	6.51831	16.7714	-10.253		1799	59.0038	55.0513	3.95253
		1800	6.35232	16.7714	-10.419		1800	55.589	55.0513	0.53769
		1801	13.7465	16.7714	-3.02487		1801	57.289	55.0513	2.23769
		1802	14.3305	16.7714	-2.44085		1802	54.1437	55.0513	-0.90762
		1803	5.03092	16.7714	-11.7404		1803	56.8502	55.0513	1.79888
		1804	14.3185	16.7714	-2.45289		1804	53.2208	55.0513	-1.83048
		1805	17.0999	16.7714	0.32861		1805	60.3007	55.0513	5.24938
		1806	13.8708	16.7714	-2.90058		1806	65.1419	55.0513	10.0906
		1807	18.2076	16.7714	1.43622		1807	55.9867	55.0513	0.93543
		1808	6.11112	16.7714	-10.6602		1808	56.1317	55.0513	1.08044
		1809	8.4718	16.7714	-8.29954		1809	58.612	55.0513	3.5607
		1810	19.1947	16.7714	2.42336		1810	55.5172	55.0513	0.4659
		1811	25.1083	16.7714	8.33699		1811	53.0783	55.0513	-1.97297
		1812	10.5231	16.7714	-6.2482		1812	51.3011	55.0513	-3.75024
		1813	4.33207	16.7714	-12.4393		1813	49.5693	55.0513	-5.48199
		1814	3.13858	16.7714	-13.6328		1814	52.6185	55.0513	-2.4328
		1815	10.4904	16.7714	-6.28095		1815	51.9737	55.0513	-3.07762
		1816	19.6082	16.7714	2.83689		1816	51.9065	55.0513	-3.14483
		1817	15.3123	16.7714	-1.45907		1817	52.6348	55.0513	-2.41649
		1818	12.9053	16.7714	-3.86606		1818	59.8727	55.0513	4.82143
		1819	12.459	16.7714	-4.31236		1819	53.0228	55.0513	-2.02848
		1820	22.007	16.7714	5.23566		1820	52.2695	55.0513	-2.78182
		1821	18.9086	16.7714	2.1372		1821	54.8521	55.0513	-0.19918
		1822	17.4953	16.7714	0.72395		1822	51.5188	55.0513	-3.53246
		1823	22.4349	16.7714	5.66353		1823	55.1671	55.0513	0.11583
		1824	16.8491	16.7714	0.07774		1824	53.2305	55.0513	-1.82078
		1825	4.87501	16.7714	-11.8963		1825	59.8328	55.0513	4.78154
		1826	19.5079	16.7714	2.73658		1826	54.2749	55.0513	-0.77639
		1827	4.93442	16.7714	-11.8369		1827	59.4013	55.0513	4.35
		1828	22.0066	16.7714	5.23527		1828	55.931	55.0513	0.87965
		1829	17.1517	16.7714	0.38039		1829	58.9315	55.0513	3.8802
		1830	13.0993	16.7714	-3.67207		1830	64.3198	55.0513	9.2685
		1831	23.6241	16.7714	6.85277		1831	53.5155	55.0513	-1.5358
		1832	16.8141	16.7714	0.04279		1832	50.997	55.0513	-4.0543
		1833	13.7189	16.7714	-3.05246		1833	50.6687	55.0513	-4.38263
		1834	18.69	16.7714	1.91864		1834	51.8753	55.0513	-3.17603
		1835	21.0331	16.7714	4.26174		1835	54.8608	55.0513	-0.19048
		1836	10.7941	16.7714	-5.97724		1836	50.394	55.0513	-4.65732
		1837	10.5794	16.7714	-6.19194		1837	50.6436	55.0513	-4.40773
		1838	19.9774	16.7714	3.20602		1838	54.9741	55.0513	-0.07724
		1839	21.2462	16.7714	4.47483		1839	52.5315	55.0513	-2.5198
		1840	21.1997	16.7714	4.42835		1840	54.3337	55.0513	-0.71757
		1841	11.645	16.7714	-5.12631		1841	55.161	55.0513	0.10973
		1842	17.4511	16.7714	0.67981		1842	54.3768	55.0513	-0.6745
		1843	14.4898	16.7714	-2.28153		1843	50.8304	55.0513	-4.22094
		1844	7.79445	16.7714	-8.97689		1844	54.5528	55.0513	-0.49846
		1845	16.5883	16.7714	-0.18304		1845	55.7509	55.0513	0.69958
		1846	12.0596	16.7714	-4.7117		1846	54.0686	55.0513	-0.98274
		1847	16.692	16.7714	-0.07938		1847	54.1037	55.0513	-0.94756
		1848	11.1193	16.7714	-5.65201		1848	51.2094	55.0513	-3.84193
		1849	17.6122	16.7714	0.84085		1849	59.8609	55.0513	4.80962
		1850	8.80924	16.7714	-7.96211		1850	59.5453	55.0513	4.494
		1851	21.0761	16.7714	4.30475		1851	54.8465	55.0513	-0.20479
		1852	15.4662	16.7714	-1.30516		1852	52.6772	55.0513	-2.37411
		1853	15.2923	16.7714	-1.47904		1853	50.8253	55.0513	-4.22604
		1854	16.3533	16.7714	-0.41804		1854	52.9427	55.0513	-2.10856
		1855	22.4394	16.7714	5.66808		1855	49.2976	55.0513	-5.75374
		1856	17.4661	16.7714	0.69476		1856	53.8686	55.0513	-1.18275
		1857	16.2856	16.7714	-0.48578		1857	53.4	55.0513	-1.65133
		1858	5.8964	16.7714	-10.875		1858	53.2104	55.0513	-1.84088
		1859	22.4275	16.7714	5.6561		1859	55.91	55.0513	0.85865
		1860	22.4975	16.7714	5.72616		1860	55.3974	55.0513	0.34611
		1861	14.7748	16.7714	-1.99658		1861	56.4379	55.0513	1.38657
		1862	23.303	16.7714	6.53165		1862	54.7838	55.0513	-0.26754
		1863	16.8675	16.7714	0.09618		1863	53.504	55.0513	-1.54731
		1864	25.0178	16.7714	8.24644		1864	52.2959	55.0513	-2.75543
		1865	28.6158	16.7714	11.8444		1865	48.4557	55.0513	-6.59564
		1866	15.3142	16.7714	-1.45713		1866	57.2235	55.0513	2.17222
		1867	14.0323	16.7714	-2.73901		1867	56.1727	55.0513	1.12136
		1868	22.1115	16.7714	5.34012		1868	54.7263	55.0513	-0.32504
		1869	20.1659	16.7714	3.39455		1869	56.5808	55.0513	1.52945
		1870	19.6324	16.7714	2.86109		1870	63.6763	55.0513	8.62499
		1871	8.73782	16.7714	-8.03353		1871	60.9103	55.0513	5.85903
		1872	13.2376	16.7714	-3.53375		1872	59.3368	55.0513	4.28553
		1873	14.5843	16.7714	-2.18707		1873	57.2671	55.0513	2.21577
		1874	23.1985	16.7714	6.42716		1874	56.2892	55.0513	1.23792
		1875	8.985	16.7714	-7.78634		1875	52.7853	55.0513	-2.266
		1876	28.1269	16.7714	11.3556		1876	55.6253	55.0513	0.57395
		1877	14.1995	16.7714	-2.57184		1877	56.4235	55.0513	1.37219
		1878	17.944	16.7714	1.17269		1878	58.6379	55.0513	3.58658
		1879	15.0155	16.7714	-1.75584		1879	62.0335	55.0513	6.9822
		1880	18.8288	16.7714	2.05744		1880	51.9473	55.0513	-3.10404
		1881	15.4146	16.7714	-1.35672		1881	56.0286	55.0513	0.97724
		1882	25.2256	16.7714	8.45422		1882	53.9508	55.0513	-1.10051
		1883	12.4945	16.7714	-4.27681		1883	52.9575	55.0513	-2.09382
		1884	18.2451	16.7714	1.47371		1884	52.7122	55.0513	-2.33915
		1885	10.3561	16.7714	-6.41522		1885	57.6719	55.0513	2.62062
		1886	16.2538	16.7714	-0.51753		1886	70.8554	65.849	5.00636
		1887	8.08954	16.7714	-8.6818		1887	66.6652	65.849	0.81613
		1888	24.6714	16.7714	7.90005		1888	67.6471	65.849	1.79804
		1889	21.5083	16.7714	4.73698		1889	67.2258	65.849	1.3768
		1890	18.1715	16.7714	1.40018		1890	59.0589	65.849	-6.79013
		1891	25.2529	16.7714	8.48155		1891	58.5473	65.849	-7.30168
		1892	21.8292	16.7714	5.05781		1892	58.7651	65.849	-7.08394
		1893	3.60795	16.7714	-13.1634		1893	58.2843	65.849	-7.56469
		1894	4.6807	16.7714	-12.0906		1894	63.9473	65.849	-1.90173
		1895	7.27599	16.7714	-9.49535		1895	61.7217	65.849	-4.12735
		1896	9.97581	16.7714	-6.79554		1896	68.8393	65.849	2.99029
		1897	11.9197	16.7714	-4.85165		1897	61.5472	65.849	-4.30185
		1898	8.93304	16.7714	-7.8383		1898	70.216	65.849	4.36693
		1899	9.23862	16.7714	-7.53273		1899	69.095	65.849	3.24602
		1900	13.1579	16.7714	-3.61345		1900	62.6853	65.849	-3.16377
		1901	16.8808	16.7714	0.10942		1901	68.1309	65.849	2.28192
		1902	18.4267	16.7714	1.65539		1902	62.8163	65.849	-3.03275
		1903	17.0053	16.7714	0.23394		1903	59.5654	65.849	-6.28363
		1904	23.655	16.7714	6.88367		1904	61.1725	65.849	-4.67652
		1905	15.0224	16.7714	-1.7489		1905	62.9839	65.849	-2.86515
		1906	18.8858	16.7714	2.11446		1906	58.6418	65.849	-7.20723
		1907	17.8042	16.7714	1.03288		1907	60.6483	65.849	-5.20069
		1908	21.6662	16.7714	4.89489		1908	62.8696	65.849	-2.97938
		1909	16.612	16.7714	-0.15935		1909	66.4929	65.849	0.64387
		1910	22.5967	16.7714	5.82533		1910	71.1717	65.849	5.32271
		1911	14.5208	16.7714	-2.25052		1911	61.0189	65.849	-4.83007
		1912	7.94018	16.7714	-8.83116		1912	62.8652	65.849	-2.98386
		1913	6.10555	16.7714	-10.6658		1913	63.4438	65.849	-2.40527
		1914	17.453	16.7714	0.68167		1914	59.9613	65.849	-5.88768
		1915	20.2205	16.7714	3.44914		1915	64.1497	65.849	-1.69932
		1916	19.6547	16.7714	2.88332		1916	61.7055	65.849	-4.14348
		1917	20.1008	16.7714	3.32943		1917	69.7118	65.849	3.86281
		1918	26.4946	16.7714	9.72325		1918	67.1669	65.849	1.31785
		1919	20.2329	16.7714	3.46152		1919	68.5328	65.849	2.68378
		1920	9.10869	16.7714	-7.66265		1920	63.9108	65.849	-1.93824
		1921	7.91122	16.7714	-8.86013		1921	67.1075	65.849	1.25842
		1922	21.6118	16.7714	4.84049		1922	60.3508	65.849	-5.49825
		1923	18.3185	16.7714	1.5472		1923	66.4311	65.849	0.58207
		1924	5.12404	16.7714	-11.6473		1924	60.3668	65.849	-5.48227
		1925	18.5589	16.7714	1.78753		1925	64.6058	65.849	-1.24324
		1926	18.0677	16.7714	1.29634		1926	60.8891	65.849	-4.95988
		1927	17.2371	16.7714	0.46575		1927	67.9074	65.849	2.05839
		1928	18.6477	16.7714	1.87633		1928	65.7049	65.849	-0.14407
		1929	21.4037	16.7714	4.63231		1929	66.4989	65.849	0.64985
		1930	23.7685	16.7714	6.99718		1930	64.9799	65.849	-0.86912
		1931	22.9245	16.7714	6.15316		1931	65.0415	65.849	-0.80753
		1932	13.7402	16.7714	-3.03114		1932	66.1082	65.849	0.25914
		1933	17.8222	16.7714	1.05084		1933	65.7354	65.849	-0.11361
		1934	15.2398	16.7714	-1.53154		1934	64.0173	65.849	-1.83174
		1935	16.7555	16.7714	-0.01584		1935	64.2995	65.849	-1.54948
		1936	14.9114	16.7714	-1.85996		1936	57.8615	65.849	-7.98755
		1937	1.58966	16.7714	-15.1817		1937	67.4215	65.849	1.57253
		1938	23.5004	16.7714	6.72905		1938	63.2118	65.849	-2.63728
		1939	17.942	16.7714	1.17063		1939	64.5337	65.849	-1.31532
		1940	15.1673	16.7714	-1.60401		1940	63.7719	65.849	-2.07707
		1941	16.4757	16.7714	-0.29561		1941	57.8919	65.849	-7.95709
		1942	11.7217	16.7714	-5.04966		1942	67.4514	65.849	1.60238
		1943	20.4661	16.7714	3.69478		1943	66.9228	65.849	1.07379
		1944	22.5203	16.7714	5.74894		1944	58.4014	65.849	-7.44762
		1945	21.877	16.7714	5.10562		1945	68.7982	65.849	2.94914
		1946	14.0994	16.7714	-2.67196		1946	60.6598	65.849	-5.18926
		1947	14.0957	16.7714	-2.67565		1947	58.5716	65.849	-7.27737
		1948	15.1463	16.7714	-1.62502		1948	68.2262	65.849	2.37723
		1949	20.1064	16.7714	3.33503		1949	66.8227	65.849	0.97366
		1950	19.3816	16.7714	2.61022		1950	64.6348	65.849	-1.21423
		1951	4.83745	16.7714	-11.9339		1951	64.5931	65.849	-1.25591
		1952	19.1141	16.7714	2.34279		1952	67.6194	65.849	1.77037
		1953	20.7559	16.7714	3.9846		1953	67.1824	65.849	1.3334
		1954	13.87	16.7714	-2.90133		1954	68.7883	65.849	2.93923
		1955	12.1235	16.7714	-4.64789		1955	67.1168	65.849	1.26778
		1956	11.0967	16.7714	-5.67463		1956	66.5145	65.849	0.66546
		1957	23.601	16.7714	6.82965		1957	68.5307	65.849	2.68166
		1958	17.8648	16.7714	1.09349		1958	66.5207	65.849	0.67169
		1959	15.1046	16.7714	-1.66673		1959	65.623	65.849	-0.22602
		1960	9.11516	16.7714	-7.65619		1960	69.6463	65.849	3.7973
		1961	10.663	16.7714	-6.10833		1961	64.7565	65.849	-1.09248
		1962	7.92673	16.7714	-8.84462		1962	68.9686	65.849	3.11957
		1963	20.5437	16.7714	3.77232		1963	64.1116	65.849	-1.73743
		1964	22.7288	16.7714	5.95741		1964	67.8131	65.849	1.96407
		1965	14.2941	16.7714	-2.4773		1965	66.8182	65.849	0.96916
		1966	4.90911	16.7714	-11.8622		1966	73.7561	65.849	7.9071
		1967	11.7341	16.7714	-5.03727		1967	64.9435	65.849	-0.90554
		1968	10.6766	16.7714	-6.0947		1968	66.9427	65.849	1.09363
		1969	19.4931	16.7714	2.7218		1969	70.744	65.849	4.89494
		1970	27.3175	16.7714	10.5461		1970	65.3794	65.849	-0.46963
		1971	18.1735	16.7714	1.40221		1971	58.1565	65.849	-7.69253
		1972	17.4348	16.7714	0.66348		1972	66.9217	65.849	1.07268
		1973	9.48441	16.7714	-7.28693		1973	59.0649	65.849	-6.7841
		1974	11.4234	16.7714	-5.34798		1974	65.3857	65.849	-0.46328
		1975	22.1127	16.7714	5.34139		1975	66.6985	65.849	0.84948
		1976	26.3992	16.7714	9.62782		1976	68.04	65.849	2.19099
		1977	19.2289	16.7714	2.45756		1977	61.2602	65.849	-4.58879
		1978	25.0349	16.7714	8.26358		1978	60.8962	65.849	-4.95281
		1979	17.4234	16.7714	0.65208		1979	69.8422	65.849	3.99318
		1980	16.8383	16.7714	0.06692		1980	65.9682	65.849	0.11919
		1981	22.8331	16.7714	6.06178		1981	66.3699	65.849	0.52084
		1982	7.45448	16.7714	-9.31686		1982	66.2598	65.849	0.41076
		1983	17.3358	16.7714	0.56446		1983	68.6941	65.849	2.84506
		1984	15.1557	16.7714	-1.61563		1984	60.2447	65.849	-5.60437
		1985	16.0105	16.7714	-0.7608		1985	60.4933	65.849	-5.35572
		1986	16.2456	16.7714	-0.52576		1986	64.393	65.849	-1.456
		1987	21.9543	16.7714	5.18295		1987	58.4998	65.849	-7.34926
		1988	16.0375	16.7714	-0.73383		1988	67.0472	65.849	1.19813
		1989	17.5927	16.7714	0.82136		1989	66.3123	65.849	0.46329
		1990	23.0033	16.7714	6.23194		1990	69.1294	65.849	3.28035
		1991	11.0905	16.7714	-5.68087		1991	61.974	65.849	-3.87506
		1992	14.8853	16.7714	-1.88603		1992	63.9254	65.849	-1.92361
		1993	17.1887	16.7714	0.41737		1993	64.6187	65.849	-1.23035
		1994	27.2964	16.7714	10.5251		1994	69.0818	65.849	3.23279
		1995	21.989	16.7714	5.21768		1995	68.0055	65.849	2.1565
		1996	20.1784	16.7714	3.40702		1996	61.3026	65.849	-4.54646
		1997	20.7428	16.7714	3.97141		1997	67.4406	65.849	1.59161
		1998	24.464	16.7714	7.69268		1998	63.4834	65.849	-2.36558
[truncated: 23,604 more rows]
