# Supplementary material for: Deciphering a hexameric protein complex with Angstrom optical resolution
Source: eLife journal article supplement (doi:10.7554/elife.76308), 2022-05-13
Supplement: fig1-data2 [file Figure 1-source data 2.xlsx]

## Sheet: Sheet1
	Protein	Human PCNA	ClpB
	Total number of particles	7593	23765
	Particles identified with three polarization states	2543	6259
	Particles per class (Classification)	-	C1	C2	C3
			3806	407	2046
	Particles used for 3D reconstruction	119	232	100	135
	Yield	~ 5 %	~ 7 %
