# Supplementary material for: Deciphering a hexameric protein complex with Angstrom optical resolution
Source: eLife journal article supplement (doi:10.7554/elife.76308), 2022-05-13
Supplement: fig1-figsupp3-data1 [file Figure 1 -figure supplement 3 -source data 1.xlsx]

## Sheet: Figure 1 - supplement 3
			Raw signal of one molecule							Raw on frames signal of one molecule							Signal filtered based on Intesity
		frame	Channel 1	Channel 2	Total				frame	Channel 1	Channel 2	Total	Polarization				frame	Channel 1	Channel 2	Total	Polarization	Fit
		1	1.11322	7.16	8.27322				1	32.8037	33.64	66.4437	44.6394				1	115.023	72.96	187.983	51.465	52.764
		2	21.7873	17.84	39.6273				2	28.987	40.96	69.947	40.072				2	155.417	58.86	214.277	58.3917	52.764
		3	-8.58771	-0.58	-9.16771				3	19.127	45.4	64.527	32.9866				3	22.3076	182.18	204.488	19.2863	15.4222
		4	43.7337	33.12	76.8537				4	17.8547	49.58	67.4347	30.968				4	42.9817	401.72	444.702	18.1129	15.4222
		5	10.9732	9	19.9732				5	12.4477	58.2	70.6477	24.8191				5	42.0276	372.14	414.168	18.5753	15.4222
		6	16.6983	16.42	33.1183				6	38.8469	34.08	72.9269	46.8739				6	23.898	399.4	423.298	13.7453	15.4222
		7	24.3318	-0.06	24.2718				7	22.1486	44.44	66.5886	35.2209				7	32.8037	401.64	434.444	15.9493	15.4222
		8	38.8037	39.64	78.4437				8	52.0466	27.52	79.5666	53.977				8	40.5963	444.32	484.916	16.8185	15.4222
		9	14.6309	3	17.6309				9	25.0112	32.14	57.1512	41.4172				9	14.038	447.02	461.058	10.0491	15.4222
		10	16.3803	1.78	18.1603				10	45.8443	42.06	87.9043	46.2337				10	22.9438	387.48	410.424	13.6764	15.4222
		11	22.5825	12.5	35.0825				11	19.286	30.52	49.806	38.4823				11	28.1918	379.92	408.112	15.2379	15.4222
		12	11.1322	3.82	14.9522				12	5.76834	31.94	37.7083	23.024				12	36.7795	391.82	428.6	17.034	15.4222
		13	35.7821	29.54	65.3221				13	33.5989	23.5	57.0989	50.0936				13	17.5367	390.74	408.277	11.9613	15.4222
		14	31.0112	-6.18	24.8312				14	35.8253	50.48	86.3053	40.1119				14	41.0734	393.86	434.933	17.8969	15.4222
		15	29.7389	-1.04	28.6989				15	23.5799	37.26	60.8399	38.5028				15	31.6905	383.4	415.091	16.04	15.4222
		16	39.4398	7.1	46.5399				16	25.4883	42.14	67.6283	37.8729				16	21.0354	380.1	401.135	13.238	15.4222
		17	33.0786	-9.5	23.5786				17	115.023	72.96	187.983	51.465				17	34.394	434.32	468.714	15.717	15.4222
		18	4.92998	34.16	39.09				18	78.4458	63.18	141.626	48.094				18	27.3967	392.68	420.077	14.796	15.4222
		19	48.6637	7.82	56.4837				19	16.7415	24.4	41.1415	39.6359				19	31.6905	380.58	412.271	16.0962	15.4222
		20	42.7795	5.86	48.6395				20	16.5825	16.7	33.2825	44.8989				20	11.8116	420.62	432.432	9.51293	15.4222
		21	20.197	2.42	22.617				21	13.0838	26.54	39.6238	35.0738				21	27.7147	474.44	502.155	13.5874	15.4222
		22	24.6499	-10.46	14.1899				22	32.4857	40.46	72.9457	41.862				22	40.7553	488.22	528.975	16.1153	15.4222
		23	30.3751	24.4	54.7751				23	52.6827	40.46	93.1427	48.7702				23	44.7311	423.26	467.991	18.0087	15.4222
		24	23.0596	11.6	34.6596				24	50.6153	24.96	75.5753	54.9222				24	35.6663	427.28	462.946	16.1149	15.4222
		25	1.11322	1.76	2.87322				25	40.1192	53.62	93.7392	40.8596				25	37.7337	400.1	437.834	17.0718	15.4222
		26	11.2912	7.38	18.6713				26	31.0544	28.12	59.1744	46.4212				26	31.3724	392.74	424.112	15.782	15.4222
		27	12.8816	2.94	15.8216				27	29.7821	36.72	66.5021	42.0058				27	21.0354	460.26	481.295	12.0672	15.4222
		28	14.1538	28.38	42.5338				28	24.057	52.3	76.357	34.1459				28	11.9706	458.04	470.011	9.18306	15.4222
		29	12.5635	12.8	25.3635				29	14.5151	32.68	47.1951	33.6815				29	44.8901	465.02	509.91	17.26	15.4222
		30	14.1538	-0.16	13.9938				30	41.0734	27.46	68.5334	50.7287				30	23.5799	428.8	452.38	13.1974	15.4222
		31	17.3345	14.2	31.5344				31	43.4588	26.02	69.4788	52.2682				31	39.8011	398.52	438.321	17.5379	15.4222
		32	17.6525	2.9	20.5525				32	32.3266	42.94	75.2666	40.9468				32	29.9412	406.8	436.741	15.1788	15.4222
		33	19.7199	36.7	56.4199				33	26.1244	26.74	52.8644	44.6664				33	45.3672	452.8	498.167	17.5643	15.4222
		34	21.7873	24.16	45.9473				34	39.9601	23.84	63.8002	52.3177				34	42.6637	438.24	480.904	17.3286	15.4222
		35	21.4693	19.32	40.7893				35	31.6905	24.36	56.0505	48.7574				35	58.2488	489.8	548.049	19.0269	15.4222
		36	19.5609	26.16	45.7209				36	33.9169	36.74	70.6569	43.8551				36	35.9844	448.18	484.164	15.8203	15.4222
		37	7.95158	18.66	26.6116				37	71.6075	37.98	109.587	53.9349				37	24.3751	453.24	477.615	13.0563	15.4222
		38	7.95158	-4.66	3.29158				38	25.9654	44.7	70.6654	37.313				38	49.6611	474.02	523.681	17.9355	15.4222
		39	-2.22644	-15.86	-18.0864				39	38.5289	43.72	82.2489	43.1907				39	24.216	430.42	454.636	13.3437	15.4222
		40	37.0544	-8.62	28.4344				40	23.898	14.84	38.7379	51.7612				40	35.0302	489.28	524.31	14.9799	15.4222
		41	43.7337	25.74	69.4737				41	38.8469	26.74	65.5869	50.3187				41	36.3024	459.52	495.822	15.6991	15.4222
		42	54.5479	23.02	77.5679				42	27.3967	38.9	66.2966	40.0039				42	33.5989	479.26	512.859	14.8302	15.4222
		43	43.8927	29.6	73.4927				43	33.5989	34.88	68.4789	44.464				43	34.394	424.02	458.414	15.8972	15.4222
		44	7.47449	6.14	13.6145				44	35.5073	38.26	73.7673	43.9307				44	33.9169	458.8	492.717	15.2106	15.4222
		45	16.5393	16.14	32.6793				45	15.1512	36.12	51.2712	32.9297				45	41.7095	445.56	487.269	17.012	15.4222
		46	25.286	13.88	39.166				46	7.99479	34.06	42.0548	25.8495				46	31.2134	432.02	463.233	15.0451	15.4222
		47	2.86257	16.14	19.0026				47	56.6585	52.66	109.318	46.0481				47	49.8201	440.36	490.18	18.5906	15.4222
		48	-9.5419	7.4	-2.1419				48	42.3456	51.72	94.0656	42.1403				48	13.4019	491.24	504.642	9.37896	15.4222
		49	14.7899	14.22	29.0099				49	18.968	33.44	52.408	36.985				49	39.8011	509.7	549.501	15.6126	15.4222
		50	5.24804	9.9	15.148				50	43.7769	39.34	83.1169	46.53				50	41.3914	498.26	539.651	16.0782	15.4222
		51	15.108	-0.82	14.288				51	18.968	22.78	41.748	42.3805				51	29.6231	542.66	572.283	13.1508	15.4222
		52	-17.1754	11.68	-5.49542				52	38.3698	59.94	98.3098	38.6628				52	31.6905	451.44	483.13	14.8396	15.4222
		53	12.7225	1.5	14.2225				53	37.4156	42.14	79.5556	43.2978				53	46.6395	473.06	519.699	17.4319	15.4222
		54	5.24804	20.62	25.868				54	18.0138	15.08	33.0938	47.543				54	21.5125	394.1	415.612	13.1505	15.4222
		55	12.8816	6.52	19.4016				55	12.1296	40.76	52.8896	28.6131				55	42.3456	466.62	508.966	16.7648	15.4222
		56	12.7225	29.54	42.2625				56	27.7147	7.12	34.8347	63.1215				56	28.8279	415.14	443.968	14.7628	15.4222
		57	12.0864	2.22	14.3064				57	20.8763	23.92	44.7963	43.052				57	30.8953	460.56	491.455	14.5206	15.4222
		58	12.8816	19.5	32.3816				58	7.0406	21.64	28.6806	29.7002				58	45.0492	439.86	484.909	17.7461	15.4222
		59	14.949	4.26	19.209				59	23.898	4.04	27.938	67.6495				59	11.3345	472.26	483.594	8.8063	15.4222
		60	36.5773	14.6	51.1773				60	30.1002	14.74	44.8402	55.0163				60	57.1356	434.06	491.196	19.9412	15.4222
		61	-11.1322	-7.2	-18.3322				61	21.0354	3.76	24.7954	67.0821				61	27.5557	430.2	457.756	14.2026	15.4222
		62	-3.65773	-3.9	-7.55773				62	18.1728	4.6	22.7728	63.2923				62	29.7821	422.74	452.522	14.865	15.4222
		63	-5.24804	9.36	4.11196				63	21.0354	8.9	29.9354	56.9577				63	32.3266	463.74	496.067	14.7899	15.4222
		64	18.1296	10.04	28.1696				64	87.6697	7.3	94.9697	73.9039				64	44.5721	402.96	447.532	18.3963	15.4222
		65	33.8737	13.36	47.2337				65	56.3404	11.48	67.8204	65.7056				65	32.0086	429.52	461.529	15.269	15.4222
		66	9.22384	17.26	26.4838				66	39.6421	11.6	51.2421	61.5892				66	38.0518	457.2	495.252	16.0924	15.4222
		67	21.3102	16.28	37.5902				67	24.5341	8.96	33.4941	58.8545				67	65.2462	459.64	524.886	20.6446	15.4222
		68	16.8574	-1.56	15.2974				68	40.5963	13.48	54.0763	60.0478				68	41.2324	441.04	482.272	17.0015	15.4222
		69	3.18063	12.14	15.3206				69	37.4156	5.02	42.4356	69.8827				69	53.1598	468.04	521.2	18.6246	15.4222
		70	22.4235	24.22	46.6435				70	36.9385	26.42	63.3586	49.7781				70	13.4019	505.98	519.382	9.24373	15.4222
		71	17.4935	-5.78	11.7135				71	28.6689	3	31.6689	72.0743				71	35.1892	427.36	462.549	16.0109	15.4222
		72	31.6473	-5.56	26.0873				72	36.7795	2.76	39.5395	74.6804				72	15.1512	180.68	195.831	16.15	15.4222
		73	12.0864	7.86	19.9464				73	25.9654	7.16	33.1254	62.2951				73	21.8305	335.52	357.351	14.3097	15.4222
		74	5.08901	-10.14	-5.05099				74	22.4667	7.08	29.5467	60.6916				74	29.305	459.02	488.325	14.1802	15.4222
		75	13.5177	7	20.5177				75	66.6775	46.2	112.877	50.226				75	27.5557	442.38	469.936	14.0135	15.4222
		76	2.86257	15.08	17.9426				76	36.7795	44.2	80.9795	42.3712				76	8.63091	350.32	358.951	8.9205	15.4222
		77	-15.4261	5.02	-10.4061				77	59.8391	46.22	106.059	48.6889				77	28.8279	385.64	414.468	15.2916	15.4222
		78	10.3371	23.2	33.5371				78	69.0629	44.9	113.963	51.1205				78	36.1434	397.7	433.843	16.7762	15.4222
		79	16.2212	7.34	23.5612				79	80.6723	49.22	129.892	52.0065				79	12.6067	433.86	446.467	9.67374	15.4222
		80	24.8089	29.48	54.2889				80	67.7907	52.78	120.571	48.5759				80	17.6957	462.3	479.996	11.0699	15.4222
		81	29.2618	22.12	51.3818				81	54.432	37.26	91.692	50.397				81	34.235	376.7	410.935	16.7762	15.4222
		82	21.3102	28.38	49.6902				82	65.8823	47	112.882	49.8147				82	32.1676	394.4	426.568	15.9387	15.4222
		83	0	8.76	8.76				83	57.7717	63.78	121.552	43.5834				83	35.3482	342.5	377.848	17.81	15.4222
		84	22.4235	27.28	49.7035				84	71.7665	57.76	129.526	48.1039				84	24.6931	367.92	392.613	14.5241	15.4222
		85	25.7631	4.52	30.2831				85	49.8201	22.06	71.8801	56.3591				85	28.987	457.92	486.907	14.1224	15.4222
		86	20.9922	21.36	42.3522				86	71.4484	45.6	117.048	51.379				86	15.1512	452.68	467.831	10.3675	15.4222
		87	10.3371	14.84	25.1771				87	50.1382	18.98	69.1182	58.3974				87	25.8063	437.04	462.846	13.658	15.4222
		88	14.3128	13.8	28.1129				88	59.521	98.66	158.181	37.8372				88	20.2402	332.82	353.06	13.853	15.4222
		89	6.0432	17.08	23.1232				89	62.0656	50.5	112.566	47.9486				89	33.1218	335.26	368.382	17.4488	15.4222
		90	18.4477	3.66	22.1077				90	23.898	41.34	65.2379	37.2464				90	26.1244	323.76	349.884	15.8578	15.4222
		91	25.9222	-9.92	16.0022				91	52.2056	20.22	72.4256	58.1041				91	9.74413	321.42	331.164	9.87702	15.4222
		92	52.1624	3.16	55.3224				92	42.5047	25.84	68.3447	52.0564				92	35.0302	290.54	325.57	19.1486	15.4222
		93	11.4503	14.84	26.2903				93	31.2134	56.54	87.7534	36.6126				93	33.2808	381.72	415.001	16.4505	15.4222
		94	2.54451	7.52	10.0645				94	46.7985	38.44	85.2385	47.8137				94	36.4614	399.08	435.541	16.8182	15.4222
		95	4.29385	-14.7	-10.4062				95	40.4372	39.34	79.7772	45.394				95	15.4693	362.24	377.709	11.6759	15.4222
		96	59.6369	30.2	89.8369				96	39.165	39.78	78.945	44.7768				96	29.7821	387.46	417.242	15.4958	15.4222
		97	3.97579	4.4	8.37579				97	62.5426	54.72	117.263	46.9125				97	30.8953	386.02	416.915	15.7965	15.4222
		98	33.7147	24.68	58.3947				98	32.3266	29.26	61.5866	46.4271				98	24.216	426.82	451.036	13.3978	15.4222
		99	25.4451	13.32	38.7651				99	59.362	49.66	109.022	47.5528				99	40.2782	394.88	435.158	17.7122	15.4222
		100	6.5203	10.52	17.0403				100	34.076	50.06	84.136	39.5242				100	40.2782	400.12	440.398	17.6031	15.4222
		101	34.987	46.96	81.947				101	57.7717	18.86	76.6317	60.2579				101	53.0007	459.34	512.341	18.7617	15.4222
		102	19.5609	4.7	24.2609				102	59.362	29.22	88.582	54.9467				102	44.095	421.02	465.115	17.9329	15.4222
		103	20.197	26.62	46.817				103	48.2298	46.4	94.6298	45.554				103	27.2376	492.74	519.978	13.2307	15.4222
		104	7.63352	13.16	20.7935				104	36.4614	35.86	72.3214	45.2383				104	43.9359	498	541.936	16.5428	15.4222
		105	18.4477	-1.24	17.2077				105	66.3594	57.32	123.679	47.0957				105	35.0302	473.48	508.51	15.2164	15.4222
		106	10.8141	20.48	31.2941				106	43.6179	38.32	81.9379	46.8536				106	25.8063	460.68	486.486	13.3158	15.4222
		107	-3.0216	-0.4	-3.4216				107	31.6905	31.96	63.6505	44.8787				107	50.7743	443	493.774	18.7034	15.4222
		108	25.127	51.4	76.527				108	55.8633	30.36	86.2233	53.6022				108	25.0112	441.88	466.891	13.3825	15.4222
		109	23.8547	55.58	79.4347				109	44.413	42.54	86.953	45.6172				109	35.1892	390.58	425.769	16.7075	15.4222
		110	24.1728	35.16	59.3328				110	49.0249	51.96	100.985	44.1673				110	20.8763	412.14	433.016	12.6838	15.4222
		111	0.63613	-4.96	-4.32387				111	35.9844	47.56	83.5444	41.0178				111	29.7821	429.16	458.942	14.7582	15.4222
		112	18.4477	64.2	82.6477				112	57.4536	28.46	85.9136	54.8615				112	34.5531	422.1	456.653	15.9665	15.4222
		113	44.8469	40.08	84.9269				113	59.521	62.56	122.081	44.2868				113	26.7605	436.62	463.381	13.905	15.4222
		114	28.1486	50.44	78.5886				114	63.4968	54.5	117.997	47.1864				114	43.7769	440.22	483.997	17.5025	15.4222
		115	18.2886	0.6	18.8886				115	67.9497	33.1	101.05	55.0871				115	59.9981	477.38	537.378	19.5203	15.4222
		116	33.5557	5.56	39.1157				116	48.2298	34.34	82.5698	49.8421				116	43.1408	452.56	495.701	17.158	15.4222
		117	5.40708	7.68	13.0871				117	50.7743	35.66	86.4343	50.0354				117	37.5747	430.32	467.895	16.4622	15.4222
		118	7.31546	6.7	14.0155				118	41.7095	33.14	74.8495	48.2871				118	28.6689	385.08	413.749	15.2619	15.4222
		119	13.8358	15.92	29.7557				119	27.5557	44.22	71.7757	38.2875				119	43.7769	456.3	500.077	17.2098	15.4222
		120	12.2454	10.86	23.1054				120	54.7501	30.4	85.1501	53.3083				120	55.8633	515.12	570.983	18.2274	15.4222
		121	48.9817	22.96	71.9417				121	39.006	43.36	82.366	43.4849				121	12.4477	467.54	479.988	9.26716	15.4222
		122	24.0138	28.1	52.1138				122	60.9523	46.46	107.412	48.8771				122	18.3318	494.04	512.372	10.9033	15.4222
		123	10.9732	22.48	33.4532				123	42.9817	51.96	94.9417	42.2868				123	26.4425	348.92	375.362	15.3916	15.4222
		124	-2.54451	-14.4	-16.9445				124	59.362	44.84	104.202	49.0055				124	39.165	417.5	456.665	17.0289	15.4222
		125	15.108	13.78	28.888				125	60.3162	54.36	114.676	46.4886				125	15.9464	422.46	438.406	10.9947	15.4222
		126	7.63352	24.02	31.6535				126	46.3214	42.18	88.5014	46.3411				126	21.1944	477.02	498.214	11.9029	15.4222
		127	22.4235	-6.94	15.4835				127	49.502	69.18	118.682	40.228				127	38.3698	415.58	453.95	16.9017	15.4222
		128	29.4209	17.16	46.5809				128	70.8123	53.46	124.272	49.0132				128	46.7985	408.78	455.579	18.6934	15.4222
		129	20.9922	2.56	23.5522				129	30.7363	60.36	91.0963	35.5114				129	13.4019	401.26	414.662	10.3568	15.4222
		130	41.3482	35.3	76.6482				130	52.0466	58.96	111.007	43.2147				130	22.7847	438.9	461.685	12.8354	15.4222
		131	30.216	4.18	34.396				131	51.2514	54.92	106.171	44.0099				131	32.6447	448.4	481.045	15.0999	15.4222
		132	58.0466	33.52	91.5666				132	47.1166	33.86	80.9766	49.7111				132	50.4562	462.7	513.156	18.2744	15.4222
		133	13.0406	5.96	19.0006				133	52.6827	24.54	77.2227	55.6864				133	46.7985	421.36	468.159	18.4314	15.4222
		134	42.9385	7.08	50.0185				134	46.0033	40.66	86.6633	46.7674				134	20.8763	430.82	451.696	12.4145	15.4222
		135	31.0112	38.14	69.1512				135	57.4536	41.9	99.3536	49.5033				135	43.4588	412.18	455.639	17.9891	15.4222
		136	51.8443	48.06	99.9043				136	52.6827	57.94	110.623	43.638				136	35.3482	363.46	398.808	17.3205	15.4222
		137	6.67933	20.1	26.7793				137	69.8581	58.36	128.218	47.5725				137	4.97318	389.42	394.393	6.44751	15.4222
		138	25.9222	19.6	45.5222				138	78.2868	45.98	124.267	52.5344				138	21.1944	361.92	383.114	13.6037	15.4222
		139	20.356	3.2	23.556				139	62.7017	54.74	117.442	46.9436				139	24.057	473.64	497.697	12.7006	15.4222
		140	40.235	26.12	66.355				140	66.0413	44.28	110.321	50.6882				140	24.6931	404.76	429.453	13.8741	15.4222
		141	-5.08901	10.36	5.27099				141	43.2998	27.62	70.9198	51.3866				141	24.057	446.36	470.417	13.07	15.4222
		142	13.9948	-8.16	5.83479				142	77.8097	54.58	132.39	50.0528				142	36.4614	406.64	443.101	16.6699	15.4222
		143	5.88417	3.28	9.16417				143	59.044	44.34	103.384	49.0884				143	45.2082	396.56	441.768	18.6567	15.4222
		144	33.2376	15.5	48.7376				144	64.451	20.38	84.831	60.6499				144	32.1676	351.08	383.248	16.8408	15.4222
		145	14.1538	4.3	18.4538				145	70.4942	52.78	123.274	49.1309				145	27.8737	349.98	377.854	15.7597	15.4222
		146	25.286	36.52	61.806				146	60.6343	31.16	91.7943	54.3644				146	14.9922	343.84	358.832	11.7945	15.4222
		147	42.4614	16.18	58.6414				147	41.7095	40.1	81.8095	45.5637				147	26.6015	330.4	357.001	15.8412	15.4222
		148	34.987	18.38	53.367				148	60.4752	57.2	117.675	45.7974				148	50.2972	382.22	432.517	19.9386	15.4222
		149	17.6525	25.04	42.6925				149	53.3188	67.8	121.119	41.5666				149	21.6715	371.6	393.272	13.5767	15.4222
		150	21.4693	50.76	72.2293				150	55.5453	30.18	85.7253	53.6055				150	10.3803	385.08	395.46	9.32382	15.4222
		151	11.7683	37.94	49.7083				151	46.4804	41.54	88.0204	46.6088				151	41.5505	421.06	462.61	17.4393	15.4222
		152	23.6957	13.38	37.0757				152	28.1918	30.32	58.5118	43.9578				152	17.5367	416.04	433.577	11.6021	15.4222
		153	18.7657	13.54	32.3057				153	78.2868	40.48	118.767	54.2809				153	21.8305	374.5	396.331	13.5736	15.4222
		154	36.2592	22.38	58.6392				154	88.7829	62.56	151.343	49.9889				154	61.9065	402	463.907	21.4262	15.4222
		155	13.6767	18.36	32.0367				155	155.417	58.86	214.277	58.3917				155	15.3102	421.24	436.55	10.7936	15.4222
		156	37.2134	22.72	59.9334				156	22.3076	33.5	55.8076	39.2154				156	32.1676	332.94	365.108	17.2669	15.4222
		157	39.5989	29.5	69.0989				157	36.4614	49.9	86.3615	40.524				157	26.6015	366.8	393.401	15.0723	15.4222
		158	13.9948	35.54	49.5348				158	35.1892	21.48	56.6692	51.9998				158	13.879	383.24	397.119	10.7747	15.4222
		159	18.2886	1.84	20.1286				159	45.8443	58.14	103.984	41.6046				159	19.9222	335.74	355.662	13.6903	15.4222
		160	-4.61192	-7.52	-12.1319				160	29.305	58.46	87.765	35.299				160	28.5099	326.94	355.45	16.4519	15.4222
		161	-1.27225	2.02	0.74775				161	41.8685	39.58	81.4485	45.8051				161	23.5799	332.18	355.76	14.9188	15.4222
		162	2.38547	-1.42	0.96547				162	87.0335	63.1	150.134	49.5865				162	9.26704	334.46	343.727	9.45056	15.4222
		163	41.8253	56.48	98.3053				163	66.8365	47.92	114.757	49.744				163	26.9196	400.94	427.86	14.5268	15.4222
		164	28.3076	33.58	61.8876				164	28.8279	12.16	40.9879	56.9974				164	6.24544	359.42	365.665	7.50942	15.4222
		165	1.27225	-10.7	-9.42775				165	33.7579	47.82	81.5779	40.037				165	8.63091	344.94	353.571	8.98867	15.4222
		166	2.86257	-8.96	-6.09743				166	35.9844	36.78	72.7644	44.6867				166	23.7389	395.04	418.779	13.7737	15.4222
		167	0.47709	8.96	9.43709				167	42.9817	21.68	64.6617	54.6172				167	14.8331	373.48	388.313	11.2707	15.4222
		168	13.1996	7.12	20.3196				168	20.8763	34.1	54.9763	38.041				168	42.0276	372.44	414.468	18.5683	15.4222
		169	5.56611	22.92	28.4861				169	11.6525	39.32	50.9725	28.563				169	34.076	341.28	375.356	17.5358	15.4222
		170	4.45289	-3.48	0.97289				170	23.4209	33.1	56.5209	40.0698				170	34.076	334.08	368.156	17.7121	15.4222
		171	3.65773	1.04	4.69773				171	23.4209	30.54	53.9609	41.2094				171	36.6205	345.72	382.34	18.0281	15.4222
		172	27.9896	34.7	62.6896				172	70.0171	39.42	109.437	53.1178				172	21.6715	346.26	367.932	14.0457	15.4222
		173	18.1296	3.16	21.2896				173	80.3542	44.22	124.574	53.4308				173	22.4667	375.4	397.867	13.7467	15.4222
		174	5.88417	7.7	13.5842				174	96.0983	40.88	136.978	56.8866				174	22.1486	367.74	389.889	13.7888	15.4222
		175	4.45289	8.6	13.0529				175	46.0033	23.74	69.7434	54.3078				175	33.4398	383.52	416.96	16.451	15.4222
		176	29.5799	43.26	72.8399				176	39.006	32.74	71.746	47.5052				176	13.0838	339.1	352.184	11.113	15.4222
		177	21.4693	26.18	47.6493				177	40.4372	55.12	95.5572	40.5806				177	67.4726	360.08	427.553	23.4067	15.4222
		178	28.3076	39.82	68.1276				178	59.203	52.84	112.043	46.6278				178	29.9412	349.1	379.041	16.3232	15.4222
		179	27.3534	53.36	80.7134				179	91.3274	34.34	125.667	58.4835				179	32.3266	388.24	420.567	16.0958	15.4222
		180	14.949	0.56	15.509				180	70.4942	67.26	137.754	45.6727				180	27.7147	333.84	361.555	16.0732	15.4222
		181	-10.4961	-13.36	-23.8561				181	88.3058	55.9	144.206	51.4932				181	27.2376	330.86	358.098	16.0093	15.4222
		182	1.43128	11.42	12.8513				182	46.3214	20.14	66.4614	56.5998				182	17.5367	392.66	410.197	11.9329	15.4222
		183	1.90838	33.02	34.9284				183	25.9654	25.92	51.8854	45.0251				183	25.1702	386.18	411.35	14.3216	15.4222
		184	34.6689	6.76	41.4289				184	47.4346	40.38	87.8146	47.3039				184	43.2998	430.82	474.12	17.59	15.4222
		185	41.5073	20.76	62.2673				185	55.8633	27.52	83.3833	54.9359				185	37.2566	227.8	265.057	22.019	15.4222
		186	35.6231	-2.8	32.8231				186	76.2194	50.34	126.559	50.8997				186	29.4641	120.74	150.204	26.289	15.4222
		187	-3.4987	18.32	14.8213				187	68.1088	49.68	117.789	49.5006				187	4.49609	129.02	133.516	10.574	15.4222
		188	15.108	20.36	35.468				188	49.6611	47.64	97.3011	45.5951				188	13.0838	251.38	264.464	12.8515	15.4222
		189	33.7147	38.04	71.7547				189	77.3326	23.66	100.993	61.0518				189	24.6931	345.66	370.353	14.9641	15.4222
		190	9.5419	8.06	17.6019				190	42.9817	25.32	68.3017	52.493				190	30.4183	453.8	484.218	14.5153	15.4222
		191	23.3776	31.34	54.7176				191	55.8633	37.4	93.2633	50.7091				191	26.6015	405.44	432.041	14.3673	15.4222
		192	7.31546	-0.34	6.97546				192	15.3102	33.68	48.9902	33.9888				192	37.5747	436.12	473.695	16.3583	15.4222
		193	17.1754	6.06	23.2354				193	17.2186	25.3	42.5186	39.5217				193	21.6715	447.46	469.132	12.4114	15.4222
		194	6.5203	7.46	13.9803				194	47.1166	48.32	95.4366	44.6388				194	21.0354	458.88	479.915	12.0848	15.4222
		195	-1.90838	2.36	0.45162				195	46.6395	45.12	91.7595	45.4744				195	22.4667	383.36	405.827	13.6086	15.4222
		196	41.9844	35.18	77.1644				196	72.0845	45.16	117.245	51.6381				196	22.4667	388.56	411.027	13.5206	15.4222
		197	-6.5203	14.24	7.7197				197	57.6127	15.66	73.2727	62.4643				197	40.9143	431.46	472.374	17.1157	15.4222
		198	15.5851	30.74	46.3251				198	69.6991	77.28	146.979	43.5217				198	35.6663	397.46	433.126	16.6761	15.4222
		199	3.81676	18.52	22.3368				199	52.0466	47.78	99.8265	46.2248				199	55.7043	412.68	468.384	20.1733	15.4222
		200	7.15642	-13.96	-6.80358				200	62.8607	40.04	102.901	51.4066				200	16.4235	430.04	446.463	11.0576	15.4222
		201	0.47709	-12	-11.5229				201	46.0033	33.58	79.5833	49.4904				201	38.8469	451.68	490.527	16.3447	15.4222
		202	6.0432	1.7	7.7432				202	74.7881	80.54	155.328	43.9389				202	31.8495	454.26	486.11	14.8309	15.4222
		203	1.74935	5.04	6.78935				203	46.0033	33.4	79.4034	49.5665				203	32.0086	438.98	470.989	15.1111	15.4222
		204	2.22644	33.84	36.0664				204	39.165	50.12	89.285	41.4761				204	47.9117	397.8	445.712	19.1392	15.4222
		205	22.5825	-16.12	6.4625				205	62.3836	43.78	106.164	50.0462				205	43.6179	371.38	414.998	18.9169	15.4222
		206	10.9732	7.48	18.4532				206	32.4857	47.16	79.6457	39.6914				206	30.5773	380.6	411.177	15.825	15.4222
		207	21.7873	-9.12	12.6673				207	82.8987	34.72	117.619	57.0904				207	40.4372	356.22	396.657	18.6199	15.4222
		208	12.5635	5.76	18.3235				208	65.8823	44.44	110.322	50.6037				208	24.3751	353.52	377.895	14.7127	15.4222
		209	13.0406	-9.46	3.5806				209	64.6101	34.42	99.0301	53.8748				209	48.2298	340.62	388.85	20.6208	15.4222
		210	14.3128	7.26	21.5728				210	35.1892	25.34	60.5292	49.6823				210	46.6395	425.98	472.619	18.3088	15.4222
		211	1.59032	-3.98	-2.38968				211	73.0387	55.5	128.539	48.9211				211	30.5773	428.94	459.517	14.9489	15.4222
		212	16.2212	6.82	23.0412				212	76.5374	86.54	163.077	43.2417				212	23.2618	334.32	357.582	14.7769	15.4222
		213	19.7199	-3.04	16.6799				213	65.2462	13.26	78.5062	65.7336				213	43.1408	439.06	482.201	17.4041	15.4222
		214	27.0354	1.14	28.1754				214	24.5341	49.74	74.2741	35.081				214	17.8547	370.02	387.875	12.3892	15.4222
		215	12.7225	9.44	22.1625				215	42.0276	59.14	101.168	40.1308				215	30.8953	415.36	446.255	15.2553	15.4222
		216	8.90577	-2.5	6.40577				216	50.6153	32.62	83.2353	51.2429				216	33.2808	388.66	421.941	16.3108	15.4222
		217	3.33966	-10.24	-6.90034				217	39.324	13.46	52.784	59.6702				217	38.2108	382.8	421.011	17.5335	15.4222
		218	-0.79516	6.5	5.70484				218	22.3076	182.18	204.488	19.2863				218	40.5963	457.94	498.536	16.5804	15.4222
		219	-6.83836	6.6	-0.23836				219	42.9817	401.72	444.702	18.1129				219	18.3318	488.9	507.232	10.9591	15.4222
		220	20.8331	-15.28	5.55315				220	42.0276	372.14	414.168	18.5753				220	16.4235	362.5	378.923	12.0162	15.4222
		221	0.47709	13.26	13.7371				221	23.898	399.4	423.298	13.7453				221	32.6447	462.6	495.245	14.8768	15.4222
		222	13.8358	4.66	18.4958				222	32.8037	401.64	434.444	15.9493				222	42.0276	407.72	449.748	17.7997	15.4222
		223	-0.15903	-19.7	-19.859				223	40.5963	444.32	484.916	16.8185				223	33.7579	272.34	306.098	19.3958	15.4222
		224	0.15903	15.28	15.439				224	14.038	447.02	461.058	10.0491				224	38.3698	336.84	375.21	18.6499	15.4222
		225	5.40708	1.46	6.86708				225	22.9438	387.48	410.424	13.6764				225	23.1028	363.34	386.443	14.1526	15.4222
		226	12.7225	7.5	20.2225				226	28.1918	379.92	408.112	15.2379				226	14.356	309.84	324.196	12.1477	15.4222
		227	-5.40708	-4.62	-10.0271				227	36.7795	391.82	428.6	17.034				227	10.0622	144.76	154.822	14.7698	15.4222
		228	19.2428	9.68	28.9228				228	17.5367	390.74	408.277	11.9613				228	14.6741	137.6	152.274	18.0851	15.4222
		229	10.3371	-4.38	5.95706				229	41.0734	393.86	434.933	17.8969				229	3.70093	126.7	130.401	9.69871	15.4222
		230	9.0648	-8.76	0.3048				230	31.6905	383.4	415.091	16.04				230	30.5773	184.84	215.417	22.1328	15.4222
		231	6.83836	-14.12	-7.28164				231	21.0354	380.1	401.135	13.238				231	1.47449	130.16	131.634	6.07537	15.4222
		232	24.0138	-0.3	23.7138				232	34.394	434.32	468.714	15.717				232	28.6689	153.08	181.749	23.401	15.4222
		233	0.79516	4.02	4.81516				233	27.3967	392.68	420.077	14.796				233	24.8521	173.36	198.212	20.7378	15.4222
		234	-10.4961	-21.04	-31.5361				234	31.6905	380.58	412.271	16.0962				234	35.6663	166.38	202.046	24.844	15.4222
		235	14.7899	12.86	27.6499				235	11.8116	420.62	432.432	9.51293				235	8.47188	110.6	119.072	15.4703	15.4222
		236	6.36127	-14.86	-8.49873				236	27.7147	474.44	502.155	13.5874				236	0.59292	146.16	146.753	3.64436	15.4222
		237	-2.54451	-2.02	-4.56451				237	40.7553	488.22	528.975	16.1153				237	17.3776	129.54	146.918	20.1159	15.4222
		238	17.9706	15.82	33.7906				238	44.7311	423.26	467.991	18.0087				238	7.99479	120.54	128.535	14.4419	15.4222
		239	9.38287	-12.94	-3.55713				239	35.6663	427.28	462.946	16.1149				239	34.7121	272.06	306.772	19.6566	15.4222
		240	8.74674	12.72	21.4667				240	37.7337	400.1	437.834	17.0718				240	29.4641	362.88	392.344	15.9048	15.4222
		241	-2.70354	-3.22	-5.92354				241	31.3724	392.74	424.112	15.782				241	30.5773	264.88	295.457	18.7658	15.4222
		242	5.56611	8.98	14.5461				242	21.0354	460.26	481.295	12.0672				242	15.1512	117.72	132.871	19.7357	15.4222
		243	14.4719	9.02	23.4919				243	11.9706	458.04	470.011	9.18306				243	22.7847	112.98	135.765	24.1838	15.4222
		244	7.63352	9.64	17.2735				244	44.8901	465.02	509.91	17.26				244	7.51769	126.5	134.018	13.7003	15.4222
		245	17.4935	-10.18	7.31348				245	23.5799	428.8	452.38	13.1974				245	25.6473	112.26	137.907	25.5468	15.4222
		246	8.42868	10.4	18.8287				246	39.8011	398.52	438.321	17.5379				246	25.6473	148.62	174.267	22.5587	15.4222
		247	8.26965	-7.94	0.32965				247	29.9412	406.8	436.741	15.1788				247	17.2186	134.2	151.419	19.7074	15.4222
		248	2.22644	7.62	9.84644				248	45.3672	452.8	498.167	17.5643				248	11.1754	392.82	403.995	9.57391	15.4222
		249	9.0648	-7.26	1.8048				249	42.6637	438.24	480.904	17.3286				249	34.8711	398.2	433.071	16.4848	15.4222
		250	13.1996	9.16	22.3596				250	58.2488	489.8	548.049	19.0269				250	27.8737	397.82	425.694	14.8262	15.4222
		251	3.97579	-0.2	3.77579				251	35.9844	448.18	484.164	15.8203				251	25.6473	401.46	427.107	14.1847	15.4222
		252	-1.59032	-3.26	-4.85032				252	24.3751	453.24	477.615	13.0563				252	39.165	406.88	446.045	17.2367	15.4222
		253	24.6499	16.24	40.8899				253	49.6611	474.02	523.681	17.9355				253	115.023	76.74	191.763	50.7579	52.764
		254	0.47709	-0.48	-0.00291				254	24.216	430.42	454.636	13.3437				254	120.43	84.32	204.75	50.079	52.764
		255	9.38287	1.3	10.6829				255	35.0302	489.28	524.31	14.9799				255	107.549	84.7	192.249	48.4128	52.764
		256	8.26965	-10.42	-2.15035				256	36.3024	459.52	495.822	15.6991				256	105.799	92.62	198.419	46.9042	52.764
		257	-6.99739	6.14	-0.85739				257	33.5989	479.26	512.859	14.8302				257	86.5564	104.3	190.856	42.3328	52.764
		258	15.9032	1.58	17.4832				258	34.394	424.02	458.414	15.8972				258	115.023	78.56	193.583	50.4285	52.764
		259	6.36127	0.04	6.40127				259	33.9169	458.8	492.717	15.2106				259	132.039	51.52	183.559	58.0091	52.764
		260	11.7683	0.84	12.6083				260	41.7095	445.56	487.269	17.012				260	108.662	79.68	188.342	49.4259	52.764
		261	18.1296	4.46	22.5896				261	31.2134	432.02	463.233	15.0451				261	121.225	88.8	210.025	49.4406	52.764
		262	8.74674	-7.94	0.80674				262	49.8201	440.36	490.18	18.5906				262	127.905	86.56	214.465	50.5575	52.764
		263	4.61192	4.26	8.87192				263	13.4019	491.24	504.642	9.37896				263	107.231	63.98	171.211	52.3162	52.764
		264	-1.74935	-6.58	-8.32935				264	39.8011	509.7	549.501	15.6126				264	90.3732	104.78	195.153	42.8832	52.764
		265	-10.019	-13.24	-23.259				265	41.3914	498.26	539.651	16.0782				265	115.023	62.16	177.183	53.6793	52.764
		266	5.88417	22.7	28.5842				266	29.6231	542.66	572.283	13.1508				266	83.6938	107.9	191.594	41.3709	52.764
		267	21.6283	-8.98	12.6483				267	31.6905	451.44	483.13	14.8396				267	132.039	95	227.039	49.6946	52.764
		268	9.5419	-1.96	7.5819				268	46.6395	473.06	519.699	17.4319				268	108.026	79.66	187.686	49.3463	52.764
		269	12.7225	-11.84	0.88253				269	21.5125	394.1	415.612	13.1505				269	105.322	74.7	180.022	49.8969	52.764
		270	5.40708	-3.98	1.42708				270	42.3456	466.62	508.966	16.7648				270	122.339	84.6	206.939	50.2538	52.764
		271	7.31546	-7.58	-0.26454				271	28.8279	415.14	443.968	14.7628				271	113.91	55.2	169.11	55.1572	52.764
		272	11.4503	1.52	12.9703				272	30.8953	460.56	491.455	14.5206				272	108.662	73.32	181.982	50.5992	52.764
		273	10.4961	-0.48	10.0161				273	45.0492	439.86	484.909	17.7461				273	129.972	100.98	230.952	48.6058	52.764
		274	21.7873	-8.84	12.9473				274	11.3345	472.26	483.594	8.8063				274	129.972	96.46	226.432	49.2555	52.764
		275	2.38547	8.72	11.1055				275	57.1356	434.06	491.196	19.9412				275	110.411	61.68	172.091	53.2248	52.764
		276	11.1322	10.7	21.8322				276	27.5557	430.2	457.756	14.2026				276	111.206	69.04	180.246	51.7645	52.764
		277	4.61192	1.56	6.17192				277	29.7821	422.74	452.522	14.865				277	105.799	83.62	189.419	48.3621	52.764
		278	17.4935	-3.54	13.9535				278	32.3266	463.74	496.067	14.7899				278	112.638	67.28	179.918	52.301	52.764
		279	2.38547	3.14	5.52547				279	44.5721	402.96	447.532	18.3963				279	129.336	92.58	221.916	49.7669	52.764
		280	-5.72514	-6.78	-12.5051				280	32.0086	429.52	461.529	15.269				280	116.613	67.14	183.753	52.8095	52.764
		281	14.4719	20.62	35.0919				281	38.0518	457.2	495.252	16.0924				281	105.004	93.12	198.124	46.7194	52.764
		282	9.70093	3.86	13.5609				282	65.2462	459.64	524.886	20.6446				282	91.8045	105.12	196.924	43.0614	52.764
		283	-0.31806	5.4	5.08194				283	41.2324	441.04	482.272	17.0015				283	105.004	84.08	189.084	48.1767	52.764
		284	17.1754	-5.86	11.3154				284	53.1598	468.04	521.2	18.6246				284	131.88	54.22	186.1	57.3322	52.764
		285	12.4045	4.98	17.3845				285	13.4019	505.98	519.382	9.24373				285	111.683	80.94	192.623	49.5919	52.764
		286	19.2428	-1.08	18.1628				286	35.1892	427.36	462.549	16.0109				286	138.401	85.2	223.601	51.8821	52.764
		287	7.79255	30.76	38.5525				287	15.1512	180.68	195.831	16.15				287	108.662	56.22	164.882	54.2727	52.764
		288	9.70093	2.02	11.7209				288	21.8305	335.52	357.351	14.3097				288	107.549	99.46	207.009	46.1197	52.764
		289	1.43128	-0.18	1.25128				289	29.305	459.02	488.325	14.1802				289	125.996	95.24	221.236	48.9956	52.764
		290	25.6041	-1.42	24.1841				290	27.5557	442.38	469.936	14.0135				290	113.592	85.92	199.512	48.9862	52.764
		291	-6.5203	20.04	13.5197				291	8.63091	350.32	358.951	8.9205				291	122.339	101.8	224.139	47.6288	52.764
		292	15.108	4.5	19.608				292	28.8279	385.64	414.468	15.2916				292	105.64	68.06	173.7	51.2474	52.764
		293	9.5419	-6.74	2.8019				293	36.1434	397.7	433.843	16.7762				293	106.912	39.88	146.792	58.5855	52.764
		294	-9.5419	3.52	-6.0219				294	12.6067	433.86	446.467	9.67374				294	109.139	58.58	167.719	53.7724	52.764
		295	11.7683	-5.1	6.66834				295	17.6957	462.3	479.996	11.0699				295	116.295	76.48	192.775	50.9598	52.764
		296	-3.4987	23.92	20.4213				296	34.235	376.7	410.935	16.7762				296	104.845	73.04	177.885	50.1498	52.764
		297	-6.36127	1.86	-4.50127				297	32.1676	394.4	426.568	15.9387				297	109.934	92.42	202.354	47.4826	52.764
		298	8.74674	-0.56	8.18674				298	35.3482	342.5	377.848	17.81				298	106.912	53.64	160.552	54.6893	52.764
		299	6.36127	9.02	15.3813				299	24.6931	367.92	392.613	14.5241				299	126.95	81.78	208.73	51.249	52.764
		300	15.108	16.28	31.388				300	28.987	457.92	486.907	14.1224				300	107.867	66.62	174.487	51.8368	52.764
		301	5.88417	-1.98	3.90417				301	15.1512	452.68	467.831	10.3675				301	104.368	63.96	168.328	51.9449	52.764
		302	0.47709	-1.24	-0.76291				302	25.8063	437.04	462.846	13.658				302	123.293	96.9	220.193	48.4421	52.764
		303	13.1996	3.46	16.6596				303	20.2402	332.82	353.06	13.853				303	147.147	78.06	225.207	53.9324	52.764
		304	0.47709	-0.18	0.29709				304	33.1218	335.26	368.382	17.4488				304	164.005	88.02	252.025	53.7738	52.764
		305	0.79516	0.5	1.29516				305	26.1244	323.76	349.884	15.8578				305	105.004	71	176.004	50.5698	52.764
		306	2.70354	20.22	22.9235				306	9.74413	321.42	331.164	9.87702				306	126.95	74.16	201.11	52.6091	52.764
		307	14.7899	-18.46	-3.67006				307	35.0302	290.54	325.57	19.1486				307	110.57	71.96	182.53	51.1059	52.764
		308	3.0216	7.24	10.2616				308	33.2808	381.72	415.001	16.4505				308	115.5	66.74	182.24	52.7596	52.764
		309	13.8358	-8.1	5.73575				309	36.4614	399.08	435.541	16.8182				309	107.072	96.16	203.232	46.5388	52.764
		310	3.81676	28.6	32.4168				310	15.4693	362.24	377.709	11.6759				310	142.854	86.86	229.714	52.0541	52.764
		311	3.81676	0.18	3.99676				311	29.7821	387.46	417.242	15.4958				311	120.271	88.56	208.831	49.3671	52.764
		312	25.7631	-3.5	22.2631				312	30.8953	386.02	416.915	15.7965				312	110.093	69.2	179.293	51.592	52.764
		313	32.7605	9.48	42.2405				313	24.216	426.82	451.036	13.3978				313	129.813	92.16	221.973	49.8831	52.764
		314	13.3587	-0.04	13.3187				314	40.2782	394.88	435.158	17.7122				314	108.821	75.8	184.621	50.1516	52.764
		315	2.38547	9.02	11.4055				315	40.2782	400.12	440.398	17.6031				315	131.244	82.96	214.204	51.5136	52.764
		316	18.4477	-1.68	16.7677				316	53.0007	459.34	512.341	18.7617				316	123.293	77.82	201.113	51.5339	52.764
		317	12.8816	-3.48	9.40156				317	44.095	421.02	465.115	17.9329				317	114.705	87.1	201.805	48.9311	52.764
		318	7.95158	-6.98	0.97158				318	27.2376	492.74	519.978	13.2307				318	108.344	60.42	168.764	53.2486	52.764
		319	10.3371	6.44	16.7771				319	43.9359	498	541.936	16.5428				319	119.317	80.9	200.217	50.5312	52.764
		320	-12.0864	7.64	-4.44641				320	35.0302	473.48	508.51	15.2164				320	132.517	86.22	218.737	51.1097	52.764
		321	16.5393	-6	10.5393				321	25.8063	460.68	486.486	13.3158				321	127.587	90.3	217.887	49.9267	52.764
		322	-6.20223	-7.48	-13.6822				322	50.7743	443	493.774	18.7034				322	108.026	99.82	207.846	46.1313	52.764
		323	15.7441	3.28	19.0241				323	25.0112	441.88	466.891	13.3825				323	114.705	103.94	218.645	46.4111	52.764
		324	4.13482	-3.52	0.61482				324	35.1892	390.58	425.769	16.7075				324	130.926	91.22	222.146	50.1482	52.764
		325	12.7225	-8.64	4.08253				325	20.8763	412.14	433.016	12.6838				325	107.867	82.02	189.887	48.9116	52.764
		326	25.4451	7.02	32.4651				326	29.7821	429.16	458.942	14.7582				326	114.546	67.52	182.066	52.4843	52.764
		327	-5.72514	0.14	-5.58514				327	34.5531	422.1	456.653	15.9665				327	118.999	72.78	191.779	51.9728	52.764
		328	19.7199	2.66	22.3799				328	26.7605	436.62	463.381	13.905				328	117.886	93.68	211.566	48.2849	52.764
		329	17.9706	-7.08	10.8906				329	43.7769	440.22	483.997	17.5025				329	131.403	89.38	220.783	50.4862	52.764
		330	18.7657	-3.66	15.1057				330	59.9981	477.38	537.378	19.5203				330	100.71	104.52	205.23	44.4682	52.764
		331	1.59032	18.38	19.9703				331	43.1408	452.56	495.701	17.158				331	118.681	95.58	214.261	48.0947	52.764
		332	0.15903	-5.72	-5.56097				332	37.5747	430.32	467.895	16.4622				332	116.136	54.1	170.236	55.6857	52.764
		333	-4.61192	1.26	-3.35192				333	28.6689	385.08	413.749	15.2619				333	109.139	88.18	197.319	48.0487	52.764
		334	5.56611	0.82	6.38611				334	43.7769	456.3	500.077	17.2098				334	64.9281	105.92	170.848	38.0588	52.764
		335	3.81676	-0.12	3.69676				335	55.8633	515.12	570.983	18.2274				335	763.395	12.92	776.315	82.5878	82.1381
		336	16.0622	7.64	23.7022				336	12.4477	467.54	479.988	9.26716				336	998.921	47.88	1046.8	77.6509	82.1381
		337	14.1538	16.14	30.2938				337	18.3318	494.04	512.372	10.9033				337	642.849	36.66	679.509	76.5691	82.1381
		338	2.86257	7.64	10.5026				338	26.4425	348.92	375.362	15.3916				338	1044.4	33.2	1077.6	79.8908	82.1381
		339	-7.31546	-1.78	-9.09546				339	39.165	417.5	456.665	17.0289				339	1031.36	28.78	1060.14	80.5165	82.1381
		340	-3.0216	-0.6	-3.6216				340	15.9464	422.46	438.406	10.9947				340	649.21	18.28	667.49	80.4744	82.1381
		341	7.15642	1.26	8.41642				341	21.1944	477.02	498.214	11.9029				341	117.409	79.62	197.029	50.5287	52.764
		342	-3.81676	-17.84	-21.6568				342	38.3698	415.58	453.95	16.9017				342	106.117	91.12	197.237	47.1804	52.764
		343	9.85996	-12.78	-2.92004				343	46.7985	408.78	455.579	18.6934				343	115.5	83.96	199.46	49.5491	52.764
		344	22.9006	-4.46	18.4406				344	13.4019	401.26	414.662	10.3568				344	143.808	93	236.808	51.1947	52.764
		345	1.59032	-18.98	-17.3897				345	22.7847	438.9	461.685	12.8354				345	114.069	47.06	161.129	57.2871	52.764
		346	10.9732	11.44	22.4132				346	32.6447	448.4	481.045	15.0999				346	112.956	27.4	140.356	63.779	52.764
		347	5.08901	2.74	7.82901				347	50.4562	462.7	513.156	18.2744				347	121.702	36.2	157.902	61.3925	52.764
		348	-5.24804	25.12	19.872				348	46.7985	421.36	468.159	18.4314				348	113.433	30.92	144.353	62.4311	52.764
		349	10.3371	-3.72	6.61706				349	20.8763	430.82	451.696	12.4145				349	156.848	72.24	229.088	55.837	52.764
		350	6.0432	5.78	11.8232				350	43.4588	412.18	455.639	17.9891				350	121.066	57.72	178.786	55.3757	52.764
		351	15.7441	13.54	29.2841				351	35.3482	363.46	398.808	17.3205				351	129.018	76.8	205.818	52.3486	52.764
		352	24.4909	-4.1	20.3909				352	4.97318	389.42	394.393	6.44751				352	147.147	97.62	244.767	50.8371	52.764
		353	2.54451	-5.14	-2.59549				353	21.1944	361.92	383.114	13.6037				353	184.52	96.3	280.82	54.1548	52.764
		354	1.11322	15.8	16.9132				354	24.057	473.64	497.697	12.7006				354	112.161	64.08	176.241	52.9158	52.764
		355	30.6931	11.94	42.6331				355	24.6931	404.76	429.453	13.8741				355	128.382	46.28	174.662	59.0191	52.764
		356	13.5177	-1.52	11.9977				356	24.057	446.36	470.417	13.07				356	130.131	58.94	189.071	56.0595	52.764
		357	6.20223	11.54	17.7422				357	36.4614	406.64	443.101	16.6699				357	138.878	94.68	233.558	50.4541	52.764
		358	13.1996	13.44	26.6396				358	45.2082	396.56	441.768	18.6567				358	110.57	31.58	142.15	61.8788	52.764
		359	23.3776	13.3	36.6776				359	32.1676	351.08	383.248	16.8408				359	119.794	42	161.794	59.3695	52.764
		360	4.45289	2.18	6.63289				360	27.8737	349.98	377.854	15.7597				360	127.587	69.84	197.427	53.5037	52.764
		361	10.4961	-8.46	2.03609				361	14.9922	343.84	358.832	11.7945				361	112.638	59.4	172.038	54.0131	52.764
		362	13.9948	12.62	26.6148				362	26.6015	330.4	357.001	15.8412				362	111.524	65.54	177.064	52.5263	52.764
		363	16.5393	-13.04	3.49929				363	50.2972	382.22	432.517	19.9386				363	139.673	99.24	238.913	49.8717	52.764
		364	11.2912	-20.96	-9.66875				364	21.6715	371.6	393.272	13.5767				364	117.568	68.02	185.588	52.7422	52.764
		365	7.95158	0.24	8.19158				365	10.3803	385.08	395.46	9.32382				365	116.454	67.54	183.994	52.7086	52.764
		366	-12.7225	4.9	-7.82253				366	41.5505	421.06	462.61	17.4393				366	128.064	56.1	184.164	56.5009	52.764
		367	8.11061	-5.94	2.17061				367	17.5367	416.04	433.577	11.6021				367	228.89	93.1	321.99	57.4716	52.764
		368	-3.65773	-2.18	-5.83773				368	21.8305	374.5	396.331	13.5736				368	151.759	100.14	251.899	50.9124	52.764
		369	-5.24804	2.74	-2.50804				369	61.9065	402	463.907	21.4262				369	124.883	68.72	193.603	53.4318	52.764
		370	7.95158	3.1	11.0516				370	15.3102	421.24	436.55	10.7936				370	109.139	75.18	184.319	50.3084	52.764
		371	7.15642	14.5	21.6564				371	32.1676	332.94	365.108	17.2669				371	146.034	73.98	220.014	54.5585	52.764
		372	9.0648	-10.7	-1.6352				372	26.6015	366.8	393.401	15.0723				372	127.746	100.62	228.366	48.4109	52.764
		373	-2.06741	19.68	17.6126				373	13.879	383.24	397.119	10.7747				373	130.29	69.72	200.01	53.814	52.764
		374	12.5635	-3.06	9.5035				374	19.9222	335.74	355.662	13.6903				374	152.077	62.42	214.497	57.3538	52.764
		375	20.6741	-4.64	16.0341				375	28.5099	326.94	355.45	16.4519				375	146.988	101	247.988	50.3436	52.764
		376	19.879	-20.5	-0.62104				376	23.5799	332.18	355.76	14.9188				376	144.921	60.82	205.741	57.0638	52.764
		377	23.3776	1.6	24.9777				377	9.26704	334.46	343.727	9.45056				377	115.5	18.76	134.26	68.0496	52.764
		378	3.0216	11.46	14.4816				378	26.9196	400.94	427.86	14.5268				378	120.271	66.12	186.391	53.4447	52.764
		379	1.90838	13.82	15.7284				379	6.24544	359.42	365.665	7.50942				379	171.32	92.48	263.8	53.6947	52.764
		380	13.8358	9.14	22.9758				380	8.63091	344.94	353.571	8.98867				380	110.252	68.96	179.212	51.6606	52.764
		381	22.4235	-5.1	17.3235				381	23.7389	395.04	418.779	13.7737				381	145.398	75.36	220.758	54.2487	52.764
		382	10.3371	0.54	10.8771				382	14.8331	373.48	388.313	11.2707				382	144.921	89.58	234.501	51.8251	52.764
		383	5.72514	0.06	5.78514				383	42.0276	372.44	414.468	18.5683				383	117.091	51.98	169.071	56.3252	52.764
		384	8.26965	-9.22	-0.95035				384	34.076	341.28	375.356	17.5358				384	121.384	66.48	187.864	53.4965	52.764
		385	-3.18063	-5.18	-8.36063				385	34.076	334.08	368.156	17.7121				385	124.247	82.24	206.487	50.869	52.764
		386	9.38287	-11.08	-1.69713				386	36.6205	345.72	382.34	18.0281				386	168.935	94.32	263.255	53.2326	52.764
		387	11.6093	-3.74	7.86931				387	21.6715	346.26	367.932	14.0457				387	142.695	97.58	240.275	50.4111	52.764
		388	2.06741	-15.18	-13.1126				388	22.4667	375.4	397.867	13.7467				388	141.899	96.66	238.559	50.4658	52.764
		389	28.3076	-2.84	25.4676				389	22.1486	367.74	389.889	13.7888				389	168.14	78.82	246.96	55.6016	52.764
		390	3.18063	9.32	12.5006				390	33.4398	383.52	416.96	16.451				390	118.522	83.28	201.802	50.0287	52.764
		391	24.3318	-0.64	23.6918				391	13.0838	339.1	352.184	11.113				391	190.086	59.26	249.346	60.8232	52.764
		392	2.06741	-3.52	-1.45259				392	67.4726	360.08	427.553	23.4067				392	174.501	87.88	262.381	54.6385	52.764
		393	18.1296	9.24	27.3696				393	29.9412	349.1	379.041	16.3232				393	123.134	59.32	182.454	55.2361	52.764
		394	-9.85996	22.58	12.72				394	32.3266	388.24	420.567	16.0958				394	115.341	65.3	180.641	53.0412	52.764
		395	-0.63613	-5.94	-6.57613				395	27.7147	333.84	361.555	16.0732				395	105.64	46.76	152.4	56.3639	52.764
		396	4.13482	-8.74	-4.60518				396	27.2376	330.86	358.098	16.0093				396	128.064	86.92	214.984	50.5167	52.764
		397	14.3128	7.76	22.0728				397	17.5367	392.66	410.197	11.9329				397	145.398	63.88	209.278	56.4623	52.764
		398	10.9732	29.78	40.7532				398	25.1702	386.18	411.35	14.3216				398	157.644	74.9	232.544	55.4218	52.764
		399	-0.31806	1	0.68194				399	43.2998	430.82	474.12	17.59				399	127.905	57.04	184.945	56.265	52.764
		400	20.356	-13.98	6.37605				400	37.2566	227.8	265.057	22.019				400	110.411	68.72	179.131	51.7293	52.764
		401	3.18063	-2.3	0.88063				401	29.4641	120.74	150.204	26.289				401	171.161	100.54	271.701	52.5327	52.764
		402	14.949	20.28	35.229				402	4.49609	129.02	133.516	10.574				402	124.565	51.78	176.345	57.1886	52.764
		403	9.85996	7.32	17.18				403	13.0838	251.38	264.464	12.8515				403	166.549	78.98	245.529	55.4475	52.764
		404	9.0648	-9.88	-0.8152				404	24.6931	345.66	370.353	14.9641				404	134.107	62.2	196.307	55.7437	52.764
		405	-1.90838	4.94	3.03162				405	30.4183	453.8	484.218	14.5153				405	157.644	98.7	256.344	51.6468	52.764
		406	3.97579	-7.1	-3.12421				406	26.6015	405.44	432.041	14.3673				406	150.328	49.44	199.768	60.1665	52.764
		407	21.1512	-4.42	16.7312				407	37.5747	436.12	473.695	16.3583				407	118.045	64.18	182.225	53.5966	52.764
		408	20.038	-2.82	17.218				408	21.6715	447.46	469.132	12.4114				408	111.047	41.26	152.307	58.6355	52.764
		409	14.4719	9.96	24.4319				409	21.0354	458.88	479.915	12.0848				409	154.781	60.02	214.801	58.0889	52.764
		410	3.0216	-7.2	-4.1784				410	22.4667	383.36	405.827	13.6086				410	153.986	103.5	257.486	50.6537	52.764
		411	-8.11061	-0.34	-8.45061				411	22.4667	388.56	411.027	13.5206				411	139.514	60.5	200.014	56.6343	52.764
		412	25.127	-8.8	16.327				412	40.9143	431.46	472.374	17.1157				412	139.037	47.4	186.437	59.7202	52.764
		413	-2.54451	-8.06	-10.6045				413	35.6663	397.46	433.126	16.6761				413	119.317	63.04	182.357	53.9877	52.764
		414	8.74674	19.18	27.9267				414	55.7043	412.68	468.384	20.1733				414	114.546	66.52	181.066	52.6906	52.764
		415	10.8141	22.22	33.0341				415	16.4235	430.04	446.463	11.0576				415	150.169	85.4	235.569	52.9794	52.764
		416	26.3993	11.18	37.5793				416	38.8469	451.68	490.527	16.3447				416	121.225	59.32	180.545	55.0262	52.764
		417	6.99739	25.08	32.0774				417	31.8495	454.26	486.11	14.8309				417	121.225	66.6	187.825	53.4538	52.764
		418	10.4961	2.78	13.2761				418	32.0086	438.98	470.989	15.1111				418	139.037	71.04	210.077	54.4427	52.764
		419	5.72514	0.74	6.46514				419	47.9117	397.8	445.712	19.1392				419	119.635	30.58	150.215	63.1798	52.764
		420	9.85996	19.32	29.18				420	43.6179	371.38	414.998	18.9169				420	115.5	74.52	190.02	51.2272	52.764
		421	7.95158	-0.06	7.89158				421	30.5773	380.6	411.177	15.825				421	133.789	74.34	208.129	53.2984	52.764
		422	18.1296	-3.3	14.8296				422	40.4372	356.22	396.657	18.6199				422	163.369	92.08	255.449	53.1024	52.764
		423	4.29385	-3.68	0.61385				423	24.3751	353.52	377.895	14.7127				423	135.061	87.76	222.821	51.1281	52.764
		424	6.83836	-4.98	1.85836				424	48.2298	340.62	388.85	20.6208				424	113.433	75.16	188.593	50.8544	52.764
		425	2.86257	5.38	8.24257				425	46.6395	425.98	472.619	18.3088				425	95.3032	123.52	218.823	41.2956	52.764
		426	16.8574	-3.32	13.5374				426	30.5773	428.94	459.517	14.9489				426	107.231	51.62	158.851	55.2461	52.764
		427	8.74674	-2.64	6.10674				427	23.2618	334.32	357.582	14.7769				427	149.056	102.64	251.696	50.3134	52.764
		428	10.019	-4.7	5.31899				428	43.1408	439.06	482.201	17.4041				428	118.681	46.44	165.121	57.9723	52.764
		429	-5.24804	-2.94	-8.18804				429	17.8547	370.02	387.875	12.3892				429	140.309	43.22	183.529	60.9694	52.764
		430	10.178	-1.18	8.99803				430	30.8953	415.36	446.255	15.2553				430	120.112	55.66	175.772	55.7555	52.764
		431	11.1322	2.02	13.1522				431	33.2808	388.66	421.941	16.3108				431	109.139	77.8	186.939	49.8254	52.764
		432	4.29385	19.32	23.6138				432	38.2108	382.8	421.011	17.5335				432	149.533	84.06	233.593	53.1386	52.764
		433	4.61192	1.1	5.71192				433	40.5963	457.94	498.536	16.5804				433	134.743	75.74	210.483	53.1397	52.764
		434	-3.65773	-0.48	-4.13773				434	18.3318	488.9	507.232	10.9591				434	165.277	89.04	254.317	53.7219	52.764
		435	6.20223	5.22	11.4222				435	16.4235	362.5	378.923	12.0162				435	148.102	80.02	228.122	53.6821	52.764
		436	-2.38547	-3.44	-5.82547				436	32.6447	462.6	495.245	14.8768				436	130.29	92.4	222.69	49.8982	52.764
		437	-2.54451	14.14	11.5955				437	42.0276	407.72	449.748	17.7997				437	132.994	69.68	202.674	54.1017	52.764
		438	14.7899	-4.06	10.7299				438	33.7579	272.34	306.098	19.3958				438	166.39	74.44	240.83	56.2228	52.764
		439	5.24804	0.84	6.08804				439	38.3698	336.84	375.21	18.6499				439	119.317	77.32	196.637	51.166	52.764
		440	12.4045	-6.4	6.00447				440	23.1028	363.34	386.443	14.1526				440	136.651	78.88	215.531	52.7739	52.764
		441	7.95158	-3.22	4.73158				441	14.356	309.84	324.196	12.1477				441	131.88	70.92	202.8	53.7466	52.764
		442	12.5635	15.4	27.9635				442	10.0622	144.76	154.822	14.7698				442	123.611	45.62	169.231	58.7211	52.764
		443	11.7683	-13.68	-1.91166				443	14.6741	137.6	152.274	18.0851				443	113.592	33	146.592	61.6756	52.764
		444	3.33966	-16.66	-13.3203				444	19.6041	81.02	100.624	26.1926				444	104.845	34.84	139.685	60.0385	52.764
		445	6.67933	10.44	17.1193				445	3.70093	126.7	130.401	9.69871				445	124.724	45.54	170.264	58.8573	52.764
		446	18.1296	9.78	27.9096				446	30.5773	184.84	215.417	22.1328				446	132.517	27.54	160.057	65.4929	52.764
		447	9.38287	-14.14	-4.75713				447	5.29125	98.68	103.971	13.0376				447	120.271	55.14	175.411	55.8981	52.764
		448	2.70354	-21.44	-18.7365				448	1.47449	130.16	131.634	6.07537				448	147.625	82.54	230.165	53.2129	52.764
		449	11.4503	8.44	19.8903				449	28.6689	153.08	181.749	23.401				449	594.345	85.3	679.645	69.2513	52.764
		450	3.65773	6.3	9.95773				450	24.8521	173.36	198.212	20.7378				450	724.591	8.32	732.911	83.8838	82.1381
		451	2.38547	15.3	17.6855				451	35.6663	166.38	202.046	24.844				451	767.371	17.86	785.231	81.3259	82.1381
		452	-0.79516	8.94	8.14484				452	8.47188	110.6	119.072	15.4703				452	828.28	19.46	847.74	81.2856	82.1381
		453	6.83836	17.08	23.9184				453	0.59292	146.16	146.753	3.64436				453	854.838	29.62	884.458	79.4554	82.1381
		454	7.18602e-16	19.02	19.02				454	17.3776	129.54	146.918	20.1159				454	700.101	8.6	708.701	83.6756	82.1381
		455	5.08901	-1.02	4.06901				455	7.99479	120.54	128.535	14.4419				455	599.434	55.84	655.274	73.0272	82.1381
		456	4.77095	10.22	14.9909				456	34.7121	272.06	306.772	19.6566				456	842.593	46.04	888.633	76.8431	82.1381
		457	-2.38547	13	10.6145				457	29.4641	362.88	392.344	15.9048				457	983.654	28.76	1012.41	80.2968	82.1381
		458	20.197	6.9	27.097				458	30.5773	264.88	295.457	18.7658				458	991.447	8.2	999.647	84.8036	82.1381
		459	0.31806	-10.14	-9.82194				459	15.1512	117.72	132.871	19.7357				459	991.924	30.86	1022.78	79.9968	82.1381
		460	10.6551	6.9	17.5551				460	22.7847	112.98	135.765	24.1838				460	949.303	27.46	976.763	80.3476	82.1381
		461	5.72514	8.62	14.3451				461	7.51769	126.5	134.018	13.7003				461	898.095	8.82	906.915	84.3405	82.1381
		462	10.3371	1.9	12.2371				462	25.6473	112.26	137.907	25.5468				462	863.903	35.42	899.323	78.5533	82.1381
		463	10.019	2.46	12.479				463	25.6473	148.62	174.267	22.5587				463	736.201	9.74	745.941	83.4386	82.1381
		464	21.6283	-13.44	8.18831				464	27.7147	90.22	117.935	28.9973				464	752.422	30.92	783.342	78.5405	82.1381
		465	16.8574	-5.52	11.3374				465	17.2186	134.2	151.419	19.7074				465	720.298	1.96	722.258	87.0139	82.1381
		466	11.1322	-1.1	10.0322				466	11.1754	392.82	403.995	9.57391				466	754.648	3.84	758.488	85.9198	82.1381
		467	-13.0406	9.38	-3.6606				467	34.8711	398.2	433.071	16.4848				467	688.968	10.38	699.348	83.0023	82.1381
		468	6.5203	-5.6	0.9203				468	27.8737	397.82	425.694	14.8262				468	680.063	17.1	697.163	80.9896	82.1381
		469	13.1996	3.34	16.5396				469	25.6473	401.46	427.107	14.1847				469	705.349	20.96	726.309	80.2193	82.1381
		470	-3.59301e-16	-10.64	-10.64				470	39.165	406.88	446.045	17.2367				470	699.942	15.44	715.382	81.552	82.1381
		471	-0.95419	1.76	0.80581				471	0.27486	18.78	19.0549	6.89804				471	681.653	1.64	683.293	87.1919	82.1381
		472	19.7199	9.56	29.2799				472	16.2644	4.04	20.3044	63.5087				472	699.942	24.96	724.902	79.3063	82.1381
		473	8.58771	-3.3	5.28771				473	23.1028	11.04	34.1428	55.3448				473	480.001	11.7	491.701	81.1263	82.1381
		474	11.6093	5.76	17.3693				474	22.9438	16.98	39.9238	49.2955				474	431.814	3.5	435.314	84.8555	82.1381
		475	9.22384	1.36	10.5838				475	17.6957	2.06	19.7557	71.1607				475	726.341	11.04	737.381	82.9717	82.1381
		476	1.59032	-4.52	-2.92968				476	52.3646	24.46	76.8246	55.6492				476	639.35	13.68	653.03	81.678	82.1381
		477	6.67933	-10.38	-3.70067				477	65.0871	57.94	123.027	46.6652				477	632.512	3.56	636.072	85.7096	82.1381
		478	6.99739	-0.68	6.31739				478	32.3266	17.28	49.6066	53.8285				478	697.715	25.1	722.815	79.2603	82.1381
		479	7.15642	-9.56	-2.40358				479	34.235	27.46	61.695	48.1523				479	692.149	19.3	711.449	80.5199	82.1381
		480	8.58771	16.24	24.8277				480	14.197	29.08	43.277	34.9427				480	656.844	2.2	659.044	86.6878	82.1381
		481	6.0432	6.58	12.6232				481	28.6689	1.3	29.9689	77.9787				481	636.647	15.4	652.047	81.1597	82.1381
		482	15.108	3.26	18.368				482	26.9196	9.5	36.4196	59.2873				482	655.89	8.2	664.09	83.6201	82.1381
		483	0.95419	0.14	1.09419				483	27.0786	32.1	59.1786	42.5662				483	693.103	7.88	700.983	83.9138	82.1381
		484	16.2212	0.64	16.8612				484	33.5989	35.16	68.7589	44.3495				484	674.815	8.64	683.455	83.5443	82.1381
		485	4.61192	11.92	16.5319				485	16.9006	2.94	19.8406	67.3598				485	755.762	21.46	777.222	80.435	82.1381
		486	18.7657	8.22	26.9857				486	61.4294	22.74	84.1694	58.6826				486	708.37	29.88	738.25	78.3939	82.1381
		487	3.81676	3.88	7.69676				487	67.9497	22.36	90.3097	60.1595				487	749.718	14.54	764.258	82.0719	82.1381
		488	-3.81676	-9.78	-13.5968				488	20.2402	4.16	24.4002	65.6126				488	729.999	4.08	734.079	85.7245	82.1381
		489	14.3128	12.88	27.1928				489	14.5151	8.54	23.0551	52.5103				489	591.8	17.92	609.72	80.1286	82.1381
		490	5.08901	-1.26	3.82901				490	36.1434	0.48	36.6234	83.4262				490	753.853	6.72	760.573	84.6064	82.1381
		491	18.7657	3.04	21.8057				491	36.9385	12.1	49.0386	60.2158				491	707.575	15.36	722.935	81.6186	82.1381
		492	0.95419	15.28	16.2342				492	42.6637	8.82	51.4837	65.5497				492	702.009	19.04	721.049	80.648	82.1381
		493	13.8358	17.92	31.7557				493	21.8305	6.46	28.2905	61.4546				493	750.037	10.32	760.356	83.3098	82.1381
		494	16.0622	4.38	20.4422				494	23.1028	2.68	25.7828	71.1915				494	737.314	6.22	743.534	84.7522	82.1381
		495	26.0812	-7.88	18.2012				495	20.2402	15.14	35.3802	49.1442				495	728.249	21.28	749.529	80.2996	82.1381
		496	15.7441	7.08	22.8241				496	47.9117	7.16	55.0717	68.8647				496	704.712	29.88	734.592	78.3647	82.1381
		497	-7.95158	15.32	7.36842				497	29.305	12.14	41.445	57.2333				497	643.644	3.04	646.684	86.0685	82.1381
		498	11.2912	3.86	15.1512				498	24.5341	3.04	27.5741	70.6076				498	648.574	8.06	656.634	83.6391	82.1381
		499	14.3128	4.16	18.4729				499	25.3292	12	37.3292	55.4603				499	746.061	13.5	759.561	82.3387	82.1381
		500	0.95419	10.26	11.2142				500	32.1676	0.12	32.2876	86.5049				500	760.055	7.5	767.555	84.3271	82.1381
		501	4.77095	9.62	14.391				501	41.8685	12.92	54.7885	60.9476				501	740.972	11.14	752.112	83.0096	82.1381
		502	10.178	6.76	16.938				502	17.8547	12.5	30.3547	50.0802				502	732.543	23.12	755.663	79.9262	82.1381
		503	-0.47709	-4.4	-4.87709				503	26.7605	3.66	30.4205	69.7045				503	739.222	22.68	761.902	80.0649	82.1381
		504	9.70093	-3.92	5.78093				504	37.4156	14.78	52.1956	57.8503				504	693.739	3.56	697.299	85.9026	82.1381
		505	11.6093	14	25.6093				505	36.1434	7.02	43.1634	66.2164				505	677.2	2.1	679.3	86.8127	82.1381
		506	5.88417	8.64	14.5242				506	38.2108	11.2	49.4108	61.569				506	653.504	14.74	668.244	81.4589	82.1381
		507	7.95158	-0.44	7.51158				507	18.4909	9.62	28.1109	54.1975				507	785.023	21.5	806.523	80.6032	82.1381
		508	2.38547	7.02	9.40547				508	24.3751	1.66	26.035	75.374				508	724.75	3.94	728.69	85.7831	82.1381
		509	2.70354	-0.58	2.12354				509	37.2566	32.92	70.1766	46.7714				509	696.92	19.64	716.56	80.4705	82.1381
		510	23.2186	-4.9	18.3186				510	54.5911	75.04	129.631	40.4619				510	605.795	5.94	611.735	84.3449	82.1381
		511	11.1322	-1.84	9.29222				511	53.0007	56.92	109.921	43.9783				511	423.704	6.9	430.604	82.7276	82.1381
		512	10.3371	-1.04	9.29706				512	66.9955	44.84	111.836	50.7132				512	783.115	6.44	789.555	84.8184	82.1381
		513	21.7873	-2.48	19.3073				513	62.5426	42.7	105.243	50.4338				513	568.422	5.88	574.302	84.1926	82.1381
		514	4.13482	1.98	6.11482				514	53.6369	38.9	92.5369	49.5818				514	425.93	9.32	435.25	81.5856	82.1381
		515	3.65773	3.52	7.17773				515	65.5643	52.04	117.604	48.3017				515	801.404	7.94	809.344	84.3157	82.1381
		516	11.2912	-7.6	3.69125				516	91.8045	52.7	144.504	52.8503				516	625.515	10.62	636.135	82.5762	82.1381
		517	7.63352	6.84	14.4735				517	34.5531	47.84	82.3931	40.3599				517	278.031	9.2	287.231	79.6903	82.1381
		518	-9.38287	-8.82	-18.2029				518	62.0656	51.32	113.386	47.719				518	769.915	21.4	791.315	80.5348	82.1381
		519	10.3371	-3.66	6.67706				519	76.0603	41.94	118	53.4037				519	742.88	7.46	750.34	84.2775	82.1381
		520	-0.79516	-2.94	-3.73516				520	61.2704	33.66	94.9304	53.4544				520	684.038	7.12	691.158	84.1746	82.1381
		521	-0.15903	-5.56	-5.71903				521	88.3058	58.64	146.946	50.8235				521	734.292	25.7	759.992	79.4035	82.1381
		522	-2.06741	-5.2	-7.26741				522	58.8849	78.1	136.985	40.9682				522	849.749	19.54	869.289	81.3773	82.1381
		523	18.1296	-8.82	9.30961				523	69.6991	57.12	126.819	47.8462				523	363.59	18.94	382.53	77.1433	82.1381
		524	0.95419	-16.66	-15.7058				524	75.5832	67.24	142.823	46.6745				524	326.217	7	333.217	81.6663	82.1381
		525	20.9922	-6.84	14.1522				525	115.023	76.74	191.763	50.7579				525	330.511	1.14	331.651	86.6389	82.1381
		526	3.33966	0.62	3.95966				526	78.1278	66.48	144.608	47.31				526	980.95	0.48	981.43	88.7328	82.1381
		527	1.11322	-14.68	-13.5668				527	46.6395	33.2	79.8395	49.8454				527	870.742	20	890.742	81.3821	82.1381
		528	22.1054	-0.22	21.8854				528	51.4104	29.66	81.0704	52.7813				528	828.916	9.8	838.716	83.7945	82.1381
		529	-15.5851	0.64	-14.9451				529	98.3248	89.44	187.765	46.3561				529	849.908	18.3	868.208	81.6522	82.1381
		530	10.4961	-8.1	2.39609				530	130.29	104.58	234.87	48.1422				530	893.96	10	903.96	83.9626	82.1381
		531	12.0864	5.16	17.2464				531	78.4458	90.18	168.626	43.0049				531	584.326	4.18	588.506	85.1655	82.1381
		532	-0.31806	-8.8	-9.11806				532	120.43	84.32	204.75	50.079				532	855.634	8.84	864.474	84.1962	82.1381
		533	2.38547	-1.54	0.84547				533	107.549	84.7	192.249	48.4128				533	846.251	8.86	855.111	84.1577	82.1381
		534	7.31546	0.74	8.05546				534	79.0819	84.44	163.522	44.0611				534	875.831	4.22	880.051	86.0293	82.1381
		535	17.6525	-9.2	8.45251				535	66.8365	75.2	142.036	43.3122				535	888.871	9.76	898.631	84.018	82.1381
		536	-5.40708	-5.74	-11.1471				536	85.2842	68.48	153.764	48.1371				536	919.564	1.5	921.064	87.6872	82.1381
		537	30.8521	-2.14	28.7121				537	105.799	92.62	198.419	46.9042				537	917.815	3.56	921.375	86.4362	82.1381
		538	6.20223	-3.5	2.70223				538	86.5564	104.3	190.856	42.3328				538	849.908	13.28	863.188	82.8749	82.1381
		539	21.7873	-8.04	13.7473				539	81.9445	89.6	171.545	43.7211				539	798.223	5.66	803.883	85.1867	82.1381
		540	16.2212	7.34	23.5612				540	74.47	76.54	151.01	44.6073				540	734.928	18.48	753.408	80.9895	82.1381
		541	7.15642	-1.66	5.49642				541	71.4484	53.1	124.548	49.2358				541	756.716	4.98	761.696	85.3621	82.1381
		542	6.36127	8.48	14.8413				542	49.343	61.34	110.683	41.8887				542	774.686	14.42	789.106	82.2309	82.1381
		543	-10.178	-2.94	-13.118				543	51.8875	42.98	94.8675	47.6938				543	757.511	9.68	767.191	83.5505	82.1381
		544	1.11322	9.18	10.2932				544	44.8901	30.42	75.3101	50.5389				544	723.637	8.26	731.897	83.9017	82.1381
		545	4.77095	-6.24	-1.46905				545	73.1978	62.12	135.318	47.3479				545	661.615	11.04	672.655	82.6395	82.1381
		546	-0.47709	2.22	1.74291				546	72.4026	78.02	150.423	43.9299				546	611.361	8	619.361	83.4742	82.1381
		547	22.7415	-3.6	19.1415				547	41.8685	44.16	86.0285	44.2368				547	210.601	8.94	219.541	78.358	82.1381
		548	7.15642	9.22	16.3764				548	94.349	84.2	178.549	46.6293				548	180.226	17.46	197.686	72.7111	82.1381
		549	15.5851	4.54	20.1251				549	96.5754	79.32	175.895	47.8149				549	439.925	1.42	441.345	86.7483	82.1381
		550	8.90577	9.92	18.8258				550	65.0871	69.56	134.647	44.0482				550	740.336	10.96	751.296	83.0628	82.1381
		551	3.0216	-13.88	-10.8584				551	16.5825	22.54	39.1225	40.6205				551	784.069	10.74	794.809	83.3246	82.1381
		552	6.5203	-8.62	-2.0997				552	62.0656	38.48	100.546	51.7833				552	518.009	6.14	524.149	83.7866	82.1381
		553	30.057	-14.6	15.457				553	35.5073	48.68	84.1873	40.499				553	191.04	6.02	197.06	79.934	82.1381
		554	2.54451	4.86	7.40451				554	80.0361	83.98	164.016	44.3111				554	182.293	3.62	185.913	81.9788	82.1381
		555	24.0138	2.88	26.8938				555	52.8417	55.26	108.102	44.3591				555	203.922	15.66	219.582	74.511	82.1381
		556	27.1944	-9.28	17.9144				556	41.7095	70.98	112.689	37.4725				556	240.817	3.9	244.717	82.7476	82.1381
		557	4.92998	0.64	5.56998				557	94.349	96.72	191.069	44.6445				557	155.894	4.44	160.334	80.4209	82.1381
		558	27.0354	22.1	49.1354				558	70.0171	57.7	127.717	47.7671				558	303.317	5.38	308.697	82.4139	82.1381
		559	4.61192	-12.44	-7.82808				559	83.5348	93.82	177.355	43.3377				559	533.753	35.6	569.353	75.5193	82.1381
		560	-10.8141	4.34	-6.47415				560	75.1061	87.06	162.166	42.8863				560	596.73	8.4	605.13	83.2338	82.1381
		561	3.65773	-2.22	1.43773				561	48.8659	42.32	91.1859	47.0583				561	752.74	23.78	776.52	79.9215	82.1381
		562	10.6551	-4.9	5.75512				562	67.1546	63.96	131.115	45.6981				562	763.872	30.9	794.772	78.628	82.1381
		563	-1.43128	5.94	4.50872				563	69.54	69.8	139.34	44.9466				563	692.626	29.1	721.726	78.4163	82.1381
		564	14.6309	15.42	30.0509				564	65.0871	74.04	139.127	43.1552				564	659.388	21.04	680.428	79.8721	82.1381
		565	9.85996	-11.84	-1.98004				565	44.5721	49.96	94.5321	43.3663				565	664.477	14.18	678.657	81.6889	82.1381
		566	13.6767	0.14	13.8167				566	85.6022	45.9	131.502	53.7863				566	775.482	12.12	787.602	82.8741	82.1381
		567	13.9948	4.82	18.8148				567	100.233	82.92	183.153	47.7121				567	720.457	1.76	722.217	87.1704	82.1381
		568	18.6067	6.42	25.0267				568	51.7285	50.12	101.848	45.4524				568	446.127	5.58	451.707	83.6187	82.1381
		569	6.36127	5.12	11.4813				569	53.3188	33.98	87.2988	51.3993				569	275.486	5.46	280.946	81.9865	82.1381
		570	21.1512	-2.78	18.3712				570	59.362	34.58	93.942	52.6479				570	708.688	9.56	718.248	83.3751	82.1381
		571	7.63352	30.34	37.9735				571	65.8823	96.62	162.502	39.5483				571	694.853	21.72	716.573	79.9737	82.1381
		572	14.7899	11.06	25.8499				572	71.6075	59.84	131.447	47.5681				572	621.539	20.8	642.339	79.6332	82.1381
		573	-8.42868	-4.98	-13.4087				573	41.7095	47.98	89.6895	42.9955				573	383.15	0.72	383.87	87.5178	82.1381
		574	5.56611	8	13.5661				574	62.7017	48.5	111.202	48.6687				574	660.343	2.1	662.443	86.7723	82.1381
		575	10.019	2.02	12.039				575	115.023	78.56	193.583	50.4285				575	631.399	1.38	632.779	87.3233	82.1381
		576	-0.47709	13.94	13.4629				576	71.7665	39.58	111.346	53.401				576	572.875	11.12	583.995	82.0684	82.1381
		577	17.8116	4.64	22.4516				577	10.8574	38.38	49.2374	28.0074				577	675.451	13.16	688.611	82.0538	82.1381
		578	8.74674	-6.2	2.54674				578	132.039	51.52	183.559	58.0091				578	612.156	29.42	641.576	77.6349	82.1381
		579	3.0216	7.02	10.0416				579	99.438	64.44	163.878	51.1656				579	718.389	4.8	723.189	85.327	82.1381
		580	4.45289	-0.82	3.63289				580	53.1598	39.68	92.8398	49.1743				580	652.232	23.56	675.792	79.2388	82.1381
		581	-2.86257	-5.88	-8.74257				581	76.3784	64.72	141.098	47.3698				581	663.682	29.08	692.762	78.1774	82.1381
		582	0.47709	-11.48	-11.0029				582	60.6343	40.6	101.234	50.7071				582	633.943	37.12	671.063	76.3971	82.1381
		583	-0.79516	-9.18	-9.97516				583	76.6965	75.3	151.996	45.2632				583	527.869	10.82	538.689	81.8524	82.1381
		584	3.97579	1.92	5.89579				584	57.6127	71.68	129.293	41.8769				584	670.68	8.44	679.12	83.5994	82.1381
		585	20.8331	4.34	25.1731				585	103.732	80.1	183.832	48.693				585	649.369	22.6	671.969	79.4326	82.1381
		586	31.4883	48.14	79.6283				586	90.0551	64.62	154.675	49.7324				586	628.536	18.52	647.056	80.2598	82.1381
		587	16.0622	6.12	22.1822				587	80.9903	61.26	142.25	48.9864				587	707.893	6.7	714.593	84.4434	82.1381
		588	0.15903	3.96	4.11903				588	108.662	79.68	188.342	49.4259				588	665.591	22.74	688.331	79.5277	82.1381
		589	-0.63613	1.1	0.46387				589	121.225	88.8	210.025	49.4406				589	660.979	33.28	694.259	77.353	82.1381
		590	18.9248	8.26	27.1848				590	95.3032	94.14	189.443	45.1759				590	651.278	22.86	674.138	79.3886	82.1381
		591	0.15903	26.8	26.959				591	127.905	86.56	214.465	50.5575				591	640.623	17.9	658.523	80.5103	82.1381
		592	7.31546	3.2	10.5155				592	49.9791	24.4	74.3791	55.0574				592	161.778	8.46	170.238	77.1192	82.1381
		593	30.216	5.6	35.816				593	72.5616	47.5	120.062	51.0243				593	433.404	7.64	441.044	82.4371	82.1381
		594	26.7173	24.44	51.1573				594	46.4804	56.8	103.28	42.1328				594	633.625	9.84	643.465	82.8965	82.1381
		595	17.9706	0.02	17.9906				595	85.1251	102.92	188.045	42.285				595	539.638	24.6	564.238	77.9478	82.1381
		596	-5.88417	12.52	6.63583				596	82.8987	57.14	140.039	50.2997				596	582.417	12.28	594.697	81.7381	82.1381
		597	2.70354	-2.22	0.48354				597	53.9549	41.06	95.0149	48.9				597	679.745	0.64	680.385	88.2425	82.1381
		598	3.4987	12.12	15.6187				598	96.2574	73.5	169.757	48.8521				598	650.165	16.22	666.385	81.0244	82.1381
		599	-7.95158	12.66	4.70842				599	72.2436	73.48	145.724	44.7569				599	436.267	3.3	439.567	85.0294	82.1381
		600	-4.29385	7.02	2.72615				600	78.4458	63.22	141.666	48.0849				600	433.245	7.14	440.385	82.6846	82.1381
		601	14.1538	0.74	14.8938				601	75.9013	69.66	145.561	46.2287				601	617.086	26.54	643.626	78.2838	82.1381
		602	4.45289	-13.16	-8.70711				602	107.231	63.98	171.211	52.3162				602	663.682	7.54	671.222	83.916	82.1381
		603	18.9248	-10.32	8.60477				603	90.3732	104.78	195.153	42.8832				603	498.766	3.9	502.666	84.9467	82.1381
		604	14.1538	-0.44	13.7138				604	80.8313	78.06	158.891	45.4997				604	458.213	18.42	476.633	78.6626	82.1381
		605	15.9032	-2.26	13.6432				605	57.9307	71.82	129.751	41.9275				605	356.751	1.82	358.571	85.9146	82.1381
		606	8.58771	13.52	22.1077				606	66.8365	46.92	113.757	50.0417				606	681.971	15.66	697.631	81.3832	82.1381
		607	3.65773	-6.42	-2.76227				607	115.023	62.16	177.183	53.6793				607	610.884	1.74	612.624	86.945	82.1381
		608	3.65773	4.56	8.21773				608	83.6938	107.9	191.594	41.3709				608	546.317	22.06	568.377	78.6379	82.1381
		609	8.74674	6.92	15.6667				609	52.8417	48.74	101.582	46.1571				609	436.108	8.42	444.528	82.0894	82.1381
		610	10.3371	7.88	18.2171				610	62.3836	84.82	147.204	40.6165				610	281.529	0.98	282.509	86.6235	82.1381
		611	0.63613	-2.04	-1.40387				611	132.039	95	227.039	49.6946				611	310.473	8.1	318.573	80.8247	82.1381
		612	23.3776	4.4	27.7777				612	108.026	79.66	187.686	49.3463				612	396.032	5.76	401.792	83.1234	82.1381
		613	1.90838	1.74	3.64838				613	105.322	74.7	180.022	49.8969				613	440.72	7.84	448.56	82.403	82.1381
		614	0.79516	-5.82	-5.02484				614	34.394	18.66	53.054	53.6257				614	464.098	2.5	466.598	85.8023	82.1381
		615	4.13482	5.4	9.53482				615	43.2998	72.82	116.12	37.6363				615	453.761	18.32	472.081	78.6387	82.1381
		616	2.22644	10.24	12.4664				616	32.9628	40.4	73.3628	42.0908				616	404.461	2.56	407.021	85.4513	82.1381
		617	-1.11322	-5.08	-6.19322				617	86.0793	57.12	143.199	50.8337				617	419.41	8.08	427.49	82.0979	82.1381
		618	18.1296	6.94	25.0696				618	122.339	84.6	206.939	50.2538				618	569.536	9.52	579.056	82.6332	82.1381
		619	8.74674	7.52	16.2667				619	58.7259	47	105.726	48.1838				619	611.202	12.78	623.982	81.772	82.1381
		620	8.90577	-6.18	2.72577				620	51.8875	56.48	108.368	43.7856				620	605	8.6	613.6	83.2009	82.1381
		621	4.13482	-23.42	-19.2852				621	75.2652	59.76	135.025	48.297				621	574.625	16.4	591.025	80.4111	82.1381
		622	1.90838	-6.92	-5.01162				622	69.8581	83.12	152.978	42.5134				622	633.307	8.82	642.127	83.2695	82.1381
		623	4.77095	2.76	7.53095				623	53.6369	22.84	76.4769	56.8734				623	471.572	20.64	492.212	78.1836	82.1381
		624	13.1996	3.9	17.0996				624	61.4294	48.22	109.649	48.4596				624	341.484	5.54	347.024	82.7413	82.1381
		625	4.92998	-4.88	0.04998				625	44.413	47.04	91.453	44.177				625	364.067	2.78	366.847	85.0059	82.1381
		626	10.6551	6.1	16.7551				626	64.451	74.58	139.031	42.911				626	385.536	3.46	388.996	84.5883	82.1381
		627	9.22384	6.34	15.5638				627	68.5858	62.56	131.146	46.3168				627	562.22	19.58	581.8	79.4292	82.1381
		628	11.7683	-7.7	4.06834				628	72.7207	56.48	129.201	48.6106				628	313.177	9.02	322.197	80.3681	82.1381
		629	19.7199	1.02	20.7399				629	55.2272	31.68	86.9072	52.8603				629	352.775	7.22	359.995	81.8585	82.1381
		630	2.54451	0.32	2.86451				630	76.8555	61.22	138.075	48.251				630	202.172	6.14	208.312	80.1143	82.1381
		631	16.0622	2.32	18.3822				631	85.6022	70.58	156.182	47.7597				631	693.262	8.64	701.902	83.63	82.1381
		632	4.29385	-9.34	-5.04615				632	92.9177	103.44	196.358	43.4641				632	642.054	41	683.054	75.8182	82.1381
		633	7.47449	-4.2	3.27449				633	46.9575	52.4	99.3575	43.43				633	701.373	24.82	726.193	79.3462	82.1381
		634	4.13482	-13.44	-9.30518				634	90.5322	59	149.532	51.0867				634	400.962	0.38	401.342	88.2367	82.1381
		635	2.70354	-9.04	-6.33646				635	53.6369	100.1	153.737	36.2043				635	320.969	12.7	333.669	78.7498	82.1381
		636	13.8358	6.62	20.4557				636	84.8071	64.86	149.667	48.8295				636	404.143	13.64	417.783	79.5901	82.1381
		637	10.3371	3.34	13.6771				637	103.096	59.72	162.816	52.7254				637	213.623	18.54	232.163	73.5851	82.1381
		638	20.197	9.28	29.477				638	38.0518	38.34	76.3918	44.8919				638	570.49	18.26	588.75	79.8567	82.1381
		639	-4.13482	4.4	0.26518				639	69.8581	67.46	137.318	45.5003				639	407.959	2.82	410.779	85.2473	82.1381
		640	2.22644	31.76	33.9864				640	113.91	55.2	169.11	55.1572				640	263.877	3.56	267.437	83.3747	82.1381
		641	4.77095	-2.7	2.07095				641	81.6264	60.28	141.906	49.3258				641	650.96	7.68	658.64	83.8009	82.1381
		642	-2.54451	10.66	8.11549				642	77.1736	74.98	152.154	45.413				642	300.295	8.48	308.775	80.4609	82.1381
		643	-5.40708	17.54	12.1329				643	76.5374	52.12	128.657	50.4702				643	679.108	5.94	685.048	84.657	82.1381
		644	9.0648	4.3	13.3648				644	80.9903	54.16	135.15	50.7253				644	403.347	3.82	407.167	84.4416	82.1381
		645	1.11322	0.14	1.25322				645	51.8875	38.4	90.2875	49.2956				645	758.306	3.32	761.626	86.2144	82.1381
		646	-4.45289	9.04	4.58711				646	95.6212	73.04	168.661	48.8471				646	703.44	1	704.44	87.8407	82.1381
		647	6.5203	-2.22	4.3003				647	98.8019	78.52	177.322	48.2839				647	622.016	0.96	622.976	87.7502	82.1381
		648	22.7415	-0.74	22.0015				648	36.6205	52.2	88.8205	39.9489				648	684.038	7.74	691.778	83.9281	82.1381
		649	-6.20223	1.6	-4.60223				649	108.662	73.32	181.982	50.5992				649	567.15	14.36	581.51	80.9588	82.1381
		650	7.31546	12.96	20.2755				650	70.6533	58.28	128.933	47.7535				650	314.767	1.06	315.827	86.6788	82.1381
		651	12.2454	-6.62	5.62544				651	72.4026	38.34	110.743	53.9568				651	553.314	31.32	584.634	76.6172	82.1381
		652	19.0838	11.62	30.7038				652	78.6048	73.92	152.525	45.8801				652	264.831	4.86	269.691	82.2853	82.1381
		653	24.1728	-7.7	16.4728				653	78.9229	54.14	133.063	50.367				653	197.242	4.48	201.722	81.4295	82.1381
		654	16.5393	-4.24	12.2993				654	53.4778	60.16	113.638	43.3145				654	388.239	6.56	394.799	82.5938	82.1381
		655	7.95158	4.96	12.9116				655	86.2384	69.98	156.218	47.9869				655	413.048	8.72	421.768	81.7329	82.1381
		656	17.6525	5.54	23.1925				656	99.597	68.9	168.497	50.2484				656	277.872	1.64	279.512	85.6069	82.1381
		657	-8.58771	2.1	-6.48771				657	97.5296	89.98	187.51	46.1538				657	519.441	24.1	543.541	77.8444	82.1381
		658	1.27225	-4.12	-2.84775				658	71.9255	77.34	149.266	43.9606				658	250.359	15.66	266.019	75.9583	82.1381
		659	19.0838	18.16	37.2438				659	65.7233	93.9	159.623	39.9164				659	613.587	8	621.587	83.4859	82.1381
		660	15.5851	-15.26	0.3251				660	66.6775	66.12	132.797	45.1203				660	695.171	9.8	704.971	83.2289	82.1381
		661	15.108	-6.38	8.72801				661	60.1572	38.68	98.8372	51.2752				661	649.369	19.76	669.129	80.1049	82.1381
		662	10.8141	1.86	12.6741				662	50.2972	42.9	93.1972	47.2762				662	417.66	7.82	425.48	82.2084	82.1381
		663	19.0838	13.84	32.9238				663	73.0387	57.86	130.899	48.3294				663	380.924	3.52	384.444	84.5091	82.1381
		664	13.9948	11.22	25.2148				664	70.1762	50.86	121.036	49.5915
		665	14.1538	3.04	17.1938				665	56.0224	55.14	111.162	45.2274
		666	16.6983	2.46	19.1583				666	86.8745	82.82	169.694	45.6846
		667	19.879	5.34	25.219				667	120.907	112.68	233.587	46.0092
		668	6.36127	-6.04	0.32127				668	41.7095	45.74	87.4495	43.6792
		669	17.4935	-4.88	12.6135				669	64.133	77.1	141.233	42.366
		670	-7.47449	-0.76	-8.23449				670	59.362	57.38	116.742	45.4864
		671	13.0406	-5.24	7.8006				671	46.0033	56.22	102.223	42.132
		672	-0.47709	-2.86	-3.33709				672	38.8469	45.56	84.4069	42.7192
		673	-2.70354	12.9	10.1965				673	85.1251	51.2	136.325	52.2049
		674	33.2376	5.68	38.9176				674	77.0145	48.4	125.415	51.5944
		675	18.7657	-21.58	-2.81426				675	88.7829	57.78	146.563	51.1061
		676	-8.90577	11.94	3.03423				676	90.2142	70.52	160.734	48.519
		677	13.6767	-11.66	2.01672				677	57.2946	30.84	88.1346	53.7336
		678	10.4961	-5.72	4.77609				678	129.972	100.98	230.952	48.6058
		679	15.5851	3.28	18.8651				679	113.433	129.06	242.493	43.1525
		680	-6.83836	9.4	2.56164				680	47.7527	25.88	73.6327	53.6403
		681	-2.06741	-13.92	-15.9874				681	85.6022	64.08	149.682	49.1335
		682	21.6283	-2.08	19.5483				682	35.6663	39.58	75.2463	43.5093
		683	13.0406	9.36	22.4006				683	47.7527	51.56	99.3127	43.9015
		684	-7.95158	17.02	9.06842				684	78.9229	78.62	157.543	45.0551
		685	17.1754	0.14	17.3154				685	53.4778	44.88	98.3578	47.5074
		686	6.83836	0.64	7.47836				686	68.2678	70.46	138.728	44.5473
		687	-1.43128	9.88	8.44872				687	68.9039	65.8	134.704	45.6602
		688	9.85996	-5.36	4.49996				688	98.9609	76.3	175.261	48.7145
		689	7.31546	15.68	22.9955				689	83.0577	61.88	144.938	49.201
		690	-0.63613	5.08	4.44387				690	41.5505	31.88	73.4305	48.7838
		691	18.9248	17.1	36.0248				691	91.0093	82.78	173.789	46.3571
		692	-0.63613	0.52	-0.11613				692	94.1899	55.24	149.43	52.5545
		693	-0.63613	4.12	3.48387				693	74.47	52.9	127.37	49.875
		694	17.0164	14.84	31.8564				694	51.0924	46.24	97.3324	46.4288
		695	9.85996	5.18	15.04				695	30.4183	19.76	50.1782	51.1317
		696	17.0164	-10.84	6.17639				696	90.3732	77.54	167.913	47.1916
		697	7.63352	-5.04	2.59352				697	84.648	64.32	148.968	48.9215
		698	-3.81676	-9.1	-12.9168				698	71.4484	96.12	167.568	40.7667
		699	19.0838	7.1	26.1838				699	53.6369	32.34	85.9769	52.1709
		700	13.6767	11.82	25.4967				700	41.2324	32.56	73.7924	48.3746
		701	20.356	-0.96	19.396				701	77.6506	41.18	118.831	53.9366
		702	17.0164	2.54	19.5564				702	56.3404	25.42	81.7604	56.1106
		703	8.42868	7.1	15.5287				703	77.6506	66.3	143.951	47.2613
		704	15.267	-0.16	15.107				704	84.8071	46.6	131.407	53.4515
		705	-2.70354	-4.22	-6.92354				705	75.9013	82.82	158.721	43.7508
		706	7.63352	4.68	12.3135				706	47.2756	44.02	91.2956	46.0218
		707	6.0432	-6.04	0.0032				707	84.171	61.18	145.351	49.5505
		708	7.47449	5.3	12.7745				708	53.7959	48.48	102.276	46.4897
		709	13.1996	9.1	22.2996				709	64.9281	66.2	131.128	44.7221
		710	14.3128	-3.5	10.8128				710	91.9635	87.92	179.883	45.644
		711	2.06741	14.34	16.4074				711	73.9929	57.72	131.713	48.5485
		712	10.8141	-5.32	5.49415				712	75.1061	45.68	120.786	52.0502
		713	29.898	-10.28	19.618				713	83.5348	66.84	150.375	48.1871
		714	13.1996	10.7	23.8996				714	73.3568	82.82	156.177	43.2631
		715	-0.31806	4.62	4.30194				715	60.1572	41.3	101.457	50.3557
		716	7.95158	-0.74	7.21158				716	85.7613	88.6	174.361	44.5336
		717	18.2886	10.08	28.3686				717	78.6048	44.02	122.625	53.1909
		718	6.20223	-14.92	-8.71777				718	40.9143	70.12	111.034	37.375
		719	7.47449	16.04	23.5145				719	55.8633	31.54	87.4033	53.079
		720	13.0406	-0.98	12.0606				720	54.432	66.64	121.072	42.1065
		721	13.5177	-13.54	-0.02231				721	73.6749	65.22	138.895	46.7449
		722	14.949	7.56	22.509				722	81.6264	59.56	141.186	49.4959
		723	10.4961	10.5	20.9961				723	55.8633	50.02	105.883	46.5818
		724	26.5583	-12.08	14.4783				724	67.3136	53.64	120.954	48.2455
		725	2.70354	7.7	10.4035				725	52.8417	43.32	96.1617	47.8413
		726	11.9274	24.72	36.6474				726	70.9713	45.16	116.131	51.4209
		727	21.6283	-20.28	1.34831				727	52.0466	45.22	97.2665	47.0123
		728	25.4451	-12.58	12.8651				728	45.8443	52.5	98.3443	43.0597
		729	5.24804	-6.76	-1.51196				729	53.0007	70.2	123.201	40.9875
		730	20.6741	-3.18	17.4941				730	83.3758	48.28	131.656	52.7302
		731	10.6551	-8.62	2.03512				731	83.0577	55.4	138.458	50.7613
		732	-3.0216	0.64	-2.3816				732	64.9281	30.98	95.9081	55.365
		733	-11.2912	-1.94	-13.2312				733	79.4	53.72	133.12	50.5613
		734	-2.22644	-8.08	-10.3064				734	74.47	64.36	138.83	47.0881
		735	21.9464	0.98	22.9264				735	97.6886	71.64	169.329	49.4246
		736	12.8816	-7.58	5.30156				736	67.6317	61.9	129.532	46.2681
		737	4.45289	16.4	20.8529				737	83.3758	76.16	159.536	46.2962
		738	7.63352	12.42	20.0535				738	40.7553	43.42	84.1753	44.093
		739	6.99739	-4.98	2.01739				739	59.521	63.76	123.281	44.0148
		740	14.4719	16.72	31.1919				740	43.4588	26.48	69.9389	52.025
		741	9.70093	-0.26	9.44093				741	46.1624	61.36	107.522	40.9372
		742	4.13482	-5.98	-1.84518				742	57.6127	59.14	116.753	44.6252
		743	18.4477	12.4	30.8477				743	129.972	96.46	226.432	49.2555
		744	10.8141	-2.46	8.35415				744	82.7397	74.46	157.2	46.5096
		745	7.15642	-1.6	5.55642				745	34.5531	53.08	87.6331	38.8974
		746	3.33966	7.6	10.9397				746	58.2488	59.48	117.729	44.7004
		747	14.949	17.18	32.129				747	101.346	54.16	155.506	53.8321
		748	28.7847	11.3	40.0847				748	79.8771	94.54	174.417	42.5888
		749	10.3371	-14.52	-4.18294				749	83.6938	63.82	147.514	48.8714
		750	9.0648	-8.14	0.9248				750	69.381	72.14	141.521	44.4415
		751	27.1944	5.32	32.5144				751	91.6454	76.14	167.785	47.6512
		752	20.197	14.86	35.057				752	47.9117	81.48	129.392	37.4818
		753	11.6093	-4.4	7.20931				753	68.2678	67.5	135.768	45.162
		754	9.22384	15.44	24.6638				754	65.7233	46.54	112.263	49.9194
		755	11.9274	7.14	19.0674				755	74.7881	73.94	148.728	45.1634
		756	16.6983	-12.4	4.29832				756	40.5963	62.54	103.136	38.8578
		757	-2.54451	-1.62	-4.16451				757	64.451	67.64	132.091	44.3083
		758	-3.81676	1.28	-2.53676				758	51.5695	42.98	94.5495	47.6061
		759	16.0622	-6	10.0622				759	76.6965	63.9	140.596	47.611
		760	20.8331	-2.48	18.3531				760	75.5832	68.8	144.383	46.3464
		761	11.7683	-1.86	9.90834				761	38.0518	43.8	81.8518	42.9865
		762	15.267	13.78	29.047				762	55.0682	65.66	120.728	42.4834
		763	1.43128	22.02	23.4513				763	55.7043	59.9	115.604	43.96
		764	2.70354	-4.32	-1.61646				764	56.0224	84.04	140.062	39.2304
		765	17.0164	9.5	26.5164				765	77.8097	70.32	148.13	46.4491
		766	23.2186	5.08	28.2986				766	44.8901	58.14	103.03	41.3056
		767	14.7899	25.7	40.4899				767	59.521	61.84	121.361	44.4526
		768	13.0406	8.82	21.8606				768	46.4804	37.84	84.3204	47.9408
		769	-2.70354	0.74	-1.96354				769	88.7829	60.06	148.843	50.5632
		770	16.5393	6.84	23.3793				770	51.0924	48.54	99.6324	45.734
		771	29.5799	24.16	53.7399				771	32.6447	27.32	59.9647	47.5472
		772	9.22384	20.92	30.1438				772	69.6991	76.28	145.979	43.7081
		773	2.70354	8.74	11.4435				773	87.6697	75.98	163.65	47.0481
		774	-1.90838	4.86	2.95162				774	65.8823	72.48	138.362	43.6334
		775	20.356	-0.18	20.1761				775	65.5643	62	127.564	45.8006
		776	-0.47709	9.26	8.78291				776	90.2142	59.64	149.854	50.8862
		777	0.79516	-1.86	-1.06484				777	65.4052	55.44	120.845	47.3651
		778	0.95419	1.9	2.85419				778	81.3084	100.92	182.228	41.9109
		779	17.9706	8.36	26.3306				779	76.8555	69.58	146.435	46.4239
		780	27.3534	17.92	45.2734				780	65.8823	75.46	141.342	43.0573
		781	16.0622	4.04	20.1022				781	76.3784	51.64	128.018	50.571
		782	8.26965	-1.9	6.36965				782	71.4484	59.86	131.308	47.5316
		783	3.97579	16.38	20.3558				783	49.502	49.56	99.062	44.9832
		784	-0.15903	-1.08	-1.23903				784	58.8849	52.06	110.945	46.7634
		785	4.92998	-3.4	1.52998				785	61.5885	78.14	139.728	41.5985
		786	5.24804	-3.48	1.76804				786	61.1114	58.62	119.731	45.5962
		787	4.29385	15.46	19.7538				787	65.8823	70.52	136.402	44.0258
		788	8.11061	10.04	18.1506				788	58.8849	74.42	133.305	41.6538
		789	7.63352	-14.1	-6.46648				789	32.1676	13.38	45.5476	57.1805
		790	1.11322	5.36	6.47322				790	73.1978	49.28	122.478	50.6306
		791	9.38287	5.52	14.9029				791	79.0819	44.5	123.582	53.125
		792	2.54451	7.8	10.3445				792	63.9739	71.16	135.134	43.4759
		793	12.8816	3.92	16.8016				793	77.4916	79.64	157.132	44.6083
		794	1.59032	-5.92	-4.32968				794	44.254	32.88	77.134	49.2398
		795	4.61192	9.66	14.2719				795	63.3378	40.54	103.878	51.3389
		796	-6.36127	6.68	0.31873				796	54.114	25.56	79.674	55.5005
		797	8.11061	18.34	26.4506				797	32.6447	42.24	74.8847	41.3191
		798	6.83836	-6.24	0.59836				798	60.1572	84.18	144.337	40.2097
		799	-5.56611	15.56	9.99389				799	26.2834	22.8	49.0834	47.0348
		800	4.13482	-11.22	-7.08518				800	58.4078	43.18	101.588	49.3105
		801	15.9032	-4.28	11.6232				801	55.3862	45.8	101.186	47.7181
		802	20.9922	-2.7	18.2922				802	52.8417	29.5	82.3417	53.2338
		803	5.08901	-2.26	2.82901				803	53.6369	27.98	81.6169	54.161
		804	4.45289	5.28	9.73289				804	74.311	47.68	121.991	51.3047
		805	-13.8358	7.32	-6.51575				805	60.6343	35.66	96.2943	52.5159
		806	15.7441	-12.38	3.36413				806	57.1356	56.18	113.316	45.2416
		807	8.26965	18.18	26.4496				807	70.8123	49.78	120.592	50.0221
		808	14.3128	-1.38	12.9329				808	42.0276	59.9	101.928	39.9507
		809	10.8141	-0.18	10.6341				809	44.413	49.18	93.593	43.5403
		810	29.898	1.94	31.8379				810	55.2272	45	100.227	47.9283
		811	5.24804	4.8	10.048				811	39.006	45.28	84.286	42.8655
		812	23.6957	4.6	28.2957				812	7.35866	28.22	35.5787	27.051
		813	25.6041	2.8	28.4041				813	31.6905	29.46	61.1505	46.0452
		814	17.1754	7.34	24.5154				814	72.8797	73	145.88	44.9764
		815	13.8358	-12.42	1.41575				815	45.5263	36.24	81.7663	48.2606
		816	-7.47449	-6.78	-14.2545				816	47.5937	30.66	78.2537	51.2487
		817	-3.4987	20.7	17.2013				817	63.1788	24.52	87.6988	58.0779
		818	6.67933	12.96	19.6393				818	27.7147	24.46	52.1747	46.7882
		819	5.88417	15.4	21.2842				819	52.6827	37.6	90.2827	49.8085
		820	14.7899	3.8	18.5899				820	45.5263	43.58	89.1063	45.6258
		821	29.5799	13.3	42.8799				821	42.0276	63.22	105.248	39.1918
		822	13.1996	-7.74	5.45963				822	64.7691	46.24	111.009	49.8043
		823	4.61192	2.3	6.91192				823	70.8123	60.56	131.372	47.238
		824	10.8141	10.44	21.2541				824	47.7527	42.04	89.7927	46.8238
		825	1.74935	-0.16	1.58935				825	59.6801	41.82	101.5	50.0673
		826	7.31546	0.38	7.69546				826	93.2357	59.2	152.436	51.4509
		827	3.0216	7	10.0216				827	71.7665	38.38	110.146	53.8222
		828	18.2886	16.2	34.4886				828	57.7717	25.52	83.2917	56.3906
		829	6.20223	15.3	21.5022				829	66.0413	45.1	111.141	50.4303
		830	19.5609	6.86	26.4209				830	92.4406	65.54	157.981	49.902
		831	30.6931	-6.16	24.5331				831	78.6048	99.58	178.185	41.6199
		832	-0.31806	-9.34	-9.65806				832	76.8555	60.12	136.975	48.5089
		833	16.0622	13.08	29.1422				833	66.6775	43.46	110.137	51.0847
		834	5.56611	-7.82	-2.25389				834	75.2652	62.98	138.245	47.5492
		835	15.5851	15.86	31.4451				835	110.411	61.68	172.091	53.2248
		836	-5.40708	9.54	4.13292				836	69.54	61.06	130.6	46.8615
		837	1.90838	5.04	6.94838				837	77.9687	58.48	136.449	49.1058
		838	1.90838	-5.18	-3.27162				838	86.0793	75.04	161.119	46.9644
		839	4.45289	-12.22	-7.76711				839	54.7501	75.08	129.83	40.4955
		840	-1.59032	0.62	-0.97032				840	58.4078	32.12	90.5278	53.4405
		841	20.6741	0.68	21.3541				841	45.5263	37.84	83.3663	47.645
		842	10.9732	-0.42	10.5532				842	68.9039	55.74	124.644	48.0312
		843	4.92998	20.36	25.29				843	94.508	81.42	175.928	47.1332
		844	6.20223	-5.54	0.66223				844	62.7017	73.68	136.382	42.6914
		845	-6.5203	16.04	9.5197				845	111.206	69.04	180.246	51.7645
		846	12.7225	17.84	30.5625				846	67.1546	66.3	133.455	45.1835
		847	3.18063	-4.9	-1.71937				847	49.9791	60.76	110.739	42.2066
		848	25.9222	11.5	37.4222				848	68.5858	68.46	137.046	45.0263
		849	-3.81676	0.82	-2.99676				849	51.8875	42.14	94.0275	47.9752
		850	6.83836	8.88	15.7184				850	64.9281	95.14	160.068	39.5603
		851	16.3803	5.62	22.0003				851	78.9229	81.52	160.443	44.5363
		852	28.4667	0.34	28.8067				852	13.0838	22.8	35.8838	37.145
		853	1.43128	11.12	12.5513				853	44.254	29.54	73.794	50.7507
		854	26.2402	7.38	33.6202				854	80.0361	56.18	136.216	50.0432
		855	39.5989	4.52	44.1189				855	77.1736	56.42	133.594	49.4685
		856	17.8116	3.74	21.5515				856	55.7043	67.14	122.844	42.3293
		857	34.0328	-0.84	33.1928				857	38.2108	54.86	93.0708	39.8475
		858	14.1538	14.66	28.8138				858	22.7847	24.66	47.4447	43.8674
		859	2.70354	-6.1	-3.39646				859	58.4078	63.48	121.888	43.8075
		860	26.2402	9.4	35.6402				860	105.799	83.62	189.419	48.3621
		861	12.5635	18.66	31.2235				861	75.7423	66.32	142.062	46.9015
		862	14.6309	6.42	21.0509				862	53.4778	67.62	121.098	41.6468
		863	31.6473	7.66	39.3073				863	62.3836	51.5	113.884	47.742
		864	8.74674	25.88	34.6267				864	74.7881	79.64	154.428	44.0998
		865	20.356	21.78	42.136				865	75.2652	71.86	147.125	45.6631
		866	11.9274	14.84	26.7674				866	49.502	53.84	103.342	43.7971
		867	5.88417	2.94	8.82417				867	70.4942	34.62	105.114	54.9777
		868	14.6309	6.54	21.1709				868	67.3136	57.32	124.634	47.2996
		869	-10.019	9.84	-0.17899				869	51.4104	50.16	101.57	45.3527
		870	-6.36127	10.42	4.05873				870	40.4372	17.16	57.5972	56.9186
		871	12.5635	-0.48	12.0835				871	79.559	70.18	149.739	46.7956
		872	14.4719	7.9	22.3719				872	92.2816	65.64	157.922	49.8562
		873	23.6957	18.52	42.2157				873	75.4242	71.88	147.304	45.6893
		874	15.5851	2.84	18.4251				874	54.432	21.78	76.212	57.6842
		875	39.2808	-8.76	30.5208				875	75.5832	44.06	119.643	52.6382
		876	22.5825	0.76	23.3425				876	51.2514	38.32	89.5714	49.1504
		877	19.2428	-1.72	17.5228				877	44.7311	27.76	72.4911	51.7697
		878	7.47449	6.5	13.9745				878	51.4104	20.78	72.1904	57.5532
		879	14.4719	1.16	15.6319				879	70.0171	62.1	132.117	46.7178
		880	12.0864	13.2	25.2864				880	59.044	33.54	92.584	52.995
		881	17.0164	-8.36	8.65639				881	66.3594	73.38	139.739	43.5601
		882	15.7441	11.46	27.2041				882	66.0413	64.24	130.281	45.3961
		883	18.6067	4	22.6067				883	49.8201	25.62	75.4401	54.3552
		884	36.1002	8.38	44.4802				884	73.6749	42.54	116.215	52.7699
		885	22.9006	4.66	27.5606				885	50.6153	75.34	125.955	39.3397
		886	17.9706	3.48	21.4506				886	89.7371	47.06	136.797	54.0891
		887	13.0406	13.8	26.8406				887	101.983	78.16	180.143	48.7996
		888	23.2186	6.84	30.0586				888	91.8045	70.04	161.844	48.8642
		889	14.6309	3.68	18.3109				889	58.8849	53.92	112.805	46.2613
		890	121.023	78.96	199.983				890	57.7717	65.34	123.112	43.2378
		891	84.4458	69.18	153.626				891	72.2436	58.5	130.744	48.017
		892	68.3836	12.58	80.9636				892	66.9955	38.58	105.576	52.8068
		893	1.27225	-10.08	-8.80775				893	60.6343	36.48	97.1143	52.2009
		894	16.6983	1.5	18.1983				894	72.0845	55.46	127.545	48.7447
		895	-0.31806	10.86	10.5419				895	25.0112	40.42	65.4312	38.1895
		896	20.8331	18.64	39.4731				896	52.6827	43.78	96.4627	47.6477
		897	14.4719	-1.24	13.2319				897	63.4968	58.9	122.397	46.0762
		898	6.67933	0.84	7.51933				898	25.6473	29.6	55.2473	42.9486
		899	5.40708	16.5	21.9071				899	47.9117	47.86	95.7717	45.0155
		900	13.8358	2.02	15.8558				900	60.6343	51.48	112.114	47.3417
		901	12.4045	17.14	29.5445				901	47.7527	65.44	113.193	40.5051
		902	16.6983	4	20.6983				902	57.7717	56.36	114.132	45.3543
		903	17.9706	22.62	40.5906				903	46.1624	42.74	88.9024	46.1031
		904	9.70093	18.18	27.8809				904	69.381	82.46	151.841	42.5293
		905	1.7965e-16	26.5	26.5				905	33.4398	36.84	70.2798	43.6135
		906	20.038	6.7	26.738				906	47.2756	49.8	97.0756	44.2549
		907	4.61192	5.56	10.1719				907	56.9765	59.38	116.357	44.4082
		908	39.9169	24.3	64.2169				908	58.0898	57.4	115.49	45.1711
		909	21.4693	3.4	24.8693				909	68.2678	35.7	103.968	54.1276
		910	28.1486	25.68	53.8286				910	87.1925	55.52	142.713	51.4113
		911	15.5851	17.9	33.4851				911	112.638	67.28	179.918	52.301
		912	17.9706	0.18	18.1506				912	34.235	39.08	73.315	43.1054
		913	19.7199	17.42	37.1399				913	75.5832	65.4	140.983	47.071
		914	19.0838	2.88	21.9638				914	80.6723	55.94	136.612	50.2152
		915	17.4935	11.08	28.5735				915	97.2116	48.1	145.312	54.8768
		916	5.40708	15.74	21.1471				916	51.8875	57.56	109.448	43.5146
		917	27.5125	36.74	64.2525				917	74.6291	60.66	135.289	47.9633
		918	5.72514	18.88	24.6051				918	80.1952	64.44	144.635	48.1268
		919	5.24804	16.62	21.868				919	93.5538	68.26	161.814	49.4965
		920	23.3776	30.76	54.1377				920	76.2194	50.88	127.099	50.75
		921	6.83836	31.82	38.6584				921	68.4268	73.64	142.067	43.9485
		922	14.1538	0.64	14.7938				922	60.6343	28.02	88.6543	55.7925
		923	22.2644	1.12	23.3844				923	71.4484	32.64	104.088	55.9455
		924	4.13482	8.12	12.2548				924	42.1866	64.12	106.307	39.0466
		925	10.3371	-7.9	2.43706				925	54.5911	17.56	72.1511	60.4401
		926	-3.0216	4.88	1.8584				926	86.2384	73.22	159.458	47.3415
		927	29.2618	11.06	40.3218				927	25.0112	41.88	66.8912	37.6966
		928	11.7683	25.84	37.6083				928	114.864	106.44	221.304	46.0908
		929	15.267	17.52	32.787				929	108.185	111.92	220.105	44.5138
		930	19.4019	11.92	31.3219				930	27.7147	34	61.7147	42.0773
		931	11.2912	-6.6	4.69125				931	99.1199	70.82	169.94	49.793
		932	12.5635	20.04	32.6035				932	95.3032	48.78	144.083	54.4189
		933	1.4372e-15	11.12	11.12				933	129.336	92.58	221.916	49.7669
		934	-0.31806	-12.38	-12.6981				934	116.613	67.14	183.753	52.8095
		935	2.06741	8.44	10.5074				935	71.2894	69.7	140.989	45.323
		936	13.9948	-0.8	13.1948				936	33.7579	20.26	54.0179	52.2352
		937	11.4503	-8.62	2.83028				937	115.5	104.88	220.38	46.3811
		938	13.0406	16.24	29.2806				938	65.2462	37.22	102.466	52.9368
		939	17.0164	20.12	37.1364				939	99.279	97.38	196.659	45.2766
		940	-1.90838	-9.78	-11.6884				940	105.004	93.12	198.124	46.7194
		941	18.7657	5.14	23.9057				941	91.8045	105.12	196.924	43.0614
		942	21.6283	6.36	27.9883				942	91.6454	67.52	159.165	49.3591
		943	15.7441	-0.16	15.5841				943	22.6257	44.52	67.1457	35.4847
		944	21.3102	20.06	41.3702				944	49.502	45.12	94.6221	46.3272
		945	15.4261	20.86	36.2861				945	64.7691	44.72	109.489	50.2756
		946	26.2402	11.58	37.8202				946	54.9091	30.4	85.3091	53.3481
		947	9.38287	13.68	23.0629				947	105.004	84.08	189.084	48.1767
		948	-13.6767	-3.54	-17.2167				948	84.648	46.52	131.168	53.4494
		949	20.038	-4	16.038				949	131.88	54.22	186.1	57.3322
		950	-6.0432	2.66	-3.3832				950	111.683	80.94	192.623	49.5919
		951	10.019	-18.64	-8.62101				951	138.401	85.2	223.601	51.8821
		952	4.45289	-0.22	4.23289				952	75.1061	56.98	132.086	48.9438
		953	-1.59032	1.14	-0.45032				953	52.0466	28.98	81.0266	53.2698
		954	0.15903	15.6	15.759				954	79.559	79.32	158.879	45.0431
		955	15.7441	-3.14	12.6041				955	49.343	34.14	83.483	50.2463
		956	-7.18602e-16	15.76	15.76				956	108.662	56.22	164.882	54.2727
		957	3.33966	8.04	11.3797				957	73.0387	76.44	149.479	44.3481
		958	22.4235	2.74	25.1635				958	75.2652	55.22	130.485	49.4184
		959	20.9922	4.88	25.8722				959	3.70093	44.3	48.0009	16.1213
		960	34.0328	28.28	62.3128				960	65.8823	45.6	111.482	50.2412
		961	10.178	12.16	22.338				961	84.171	62.08	146.251	49.3438
		962	2.22644	9.34	11.5664				962	70.9713	42.78	113.751	52.1747
		963	-0.15903	-8.86	-9.01903				963	67.6317	24.78	92.4117	58.8132
		964	16.0622	17.08	33.1422				964	46.4804	43.18	89.6604	46.0548
		965	1.11322	7.16	8.27322				965	107.549	99.46	207.009	46.1197
		966	-0.47709	0.42	-0.05709				966	125.996	95.24	221.236	48.9956
		967	8.58771	0.24	8.82771				967	113.592	85.92	199.512	48.9862
		968	-14.7899	20.7	5.91006				968	122.339	101.8	224.139	47.6288
		969	9.0648	0.88	9.9448				969	105.64	68.06	173.7	51.2474
		970	31.0112	-1.36	29.6512				970	34.7121	25.28	59.9921	49.5229
		971	9.0648	17.18	26.2448				971	103.414	97.5	200.914	45.8434
		972	12.4045	10.52	22.9245				972	54.273	28.3	82.573	54.1667
		973	22.7415	30.4	53.1415				973	65.7233	32.66	98.3833	54.8187
		974	11.2912	4.04	15.3313				974	87.0335	71.68	158.714	47.7757
		975	9.0648	-6.68	2.3848				975	97.6886	68.22	165.909	50.1156
		976	30.5341	23.56	54.0941				976	95.4622	66.92	162.382	50.0618
		977	6.83836	4.86	11.6984				977	39.8011	44.02	83.8211	43.5575
		978	11.6093	2.84	14.4493				978	62.2246	54.04	116.265	47.0184
		979	23.0596	22.16	45.2196				979	60.7933	52.04	112.833	47.2247
		980	12.0864	0.56	12.6464				980	47.1166	25.76	72.8766	53.5204
		981	22.5825	22.7	45.2825				981	88.4648	82.44	170.905	46.0101
		982	25.127	16.78	41.907				982	116.295	107.1	223.395	46.1795
		983	43.7337	22.32	66.0537				983	53.9549	64.5	118.455	42.4463
		984	17.6525	-15.22	2.43251				984	106.912	39.88	146.792	58.5855
		985	22.1054	16.98	39.0854				985	55.7043	49.9	105.604	46.5754
		986	28.3076	32.52	60.8276				986	59.203	68.66	127.863	42.8792
		987	33.5557	6.2	39.7557				987	109.139	58.58	167.719	53.7724
		988	19.0838	32.54	51.6238				988	12.7657	30.82	43.5857	32.7648
		989	13.8358	19.72	33.5558				989	60.1572	48.2	108.357	48.1677
		990	32.2834	26.74	59.0234				990	116.295	76.48	192.775	50.9598
		991	33.8737	14.78	48.6537				991	85.1251	28.62	113.745	59.8933
		992	12.8816	25.48	38.3616				992	36.9385	30.12	67.0585	47.918
		993	46.4372	18.58	65.0172				993	86.7155	86.94	173.655	44.963
		994	24.1728	45.26	69.4328				994	83.8529	66.3	150.153	48.3566
		995	14.6309	5.4	20.0309				995	61.7475	52.42	114.167	47.3431
		996	28.3076	27.9	56.2076				996	104.845	73.04	177.885	50.1498
		997	9.22384	2.26	11.4838				997	109.934	92.42	202.354	47.4826
		998	6.83836	6.4	13.2384				998	106.912	53.64	160.552	54.6893
		999	17.0164	7.58	24.5964				999	90.2142	60.54	150.754	50.6761
		1000	1.43128	0.8	2.23128				1000	106.912	107.76	214.672	44.8869
		1001	9.5419	9.4	18.9419				1001	99.7561	75.68	175.436	48.944
		1002	-1.11322	4.56	3.44678				1002	91.9635	43	134.964	55.6358
		1003	4.92998	7.9	12.83				1003	68.9039	30.6	99.5039	56.3203
		1004	38.4857	46.46	84.9457				1004	48.2298	36.36	84.5898	49.0332
		1005	39.1218	20.44	59.5618				1005	100.869	61	161.869	52.1295
		1006	17.8116	28.1	45.9115				1006	75.4242	69.28	144.704	46.2168
		1007	15.5851	12.42	28.0051				1007	76.8555	41.26	118.115	53.7697
		1008	16.3803	8.38	24.7603				1008	126.95	81.78	208.73	51.249
		1009	22.9006	8.12	31.0206				1009	61.9065	61.32	123.227	45.1364
		1010	14.3128	-7.34	6.97285				1010	26.2834	10.6	36.8834	57.5822
		1011	4.77095	-12.14	-7.36905				1011	59.362	52.4	111.762	46.7857
		1012	6.5203	-18.54	-12.0197				1012	75.2652	30.9	106.165	57.3507
		1013	-1.74935	-4.48	-6.22935				1013	77.6506	64.34	141.991	47.6895
		1014	0.95419	0.36	1.31419				1014	92.5996	87.9	180.5	45.746
		1015	9.0648	15.38	24.4448				1015	107.867	66.62	174.487	51.8368
		1016	-2.22644	-6.68	-8.90644				1016	66.3594	33.5	99.8594	54.6058
		1017	11.9274	1	12.9274				1017	32.0086	36.22	68.2286	43.2306
		1018	18.1296	0.52	18.6496				1018	95.1441	57.6	152.744	52.1145
		1019	10.019	-10	0.01899				1019	50.1382	37.2	87.3382	49.2595
		1020	11.4503	1.48	12.9303				1020	82.5806	69.82	152.401	47.4015
		1021	58.6827	46.46	105.143				1021	104.368	63.96	168.328	51.9449
		1022	56.6153	30.96	87.5753				1022	59.6801	49.96	109.64	47.5431
		1023	46.1192	59.62	105.739				1023	59.521	60.92	120.441	44.6672
		1024	28.9438	16.64	45.5838				1024	66.6775	62.94	129.617	45.8262
		1025	24.8089	30.32	55.1289				1025	69.222	50.04	119.262	49.6278
		1026	3.0216	-4.62	-1.5984				1026	123.293	96.9	220.193	48.4421
		1027	37.0544	34.12	71.1744				1027	99.597	64.96	164.557	51.0754
		1028	21.9464	31.64	53.5864				1028	56.3404	38.1	94.4404	50.5681
		1029	4.77095	6.26	11.031				1029	147.147	78.06	225.207	53.9324
		1030	35.7821	42.72	78.5021				1030	164.005	88.02	252.025	53.7738
		1031	21.7873	26.66	48.4473				1031	80.9903	45.02	126.01	53.293
		1032	30.057	58.3	88.357				1032	51.8875	38.3	90.1875	49.3325
		1033	6.20223	-5.48	0.72223				1033	26.7605	16.62	43.3805	51.7592
		1034	9.38287	23.9	33.2829				1034	77.4916	45.7	123.192	52.4777
		1035	20.5151	38.68	59.1951				1035	74.152	70.02	144.172	45.8212
		1036	-11.1322	5.16	-5.97222				1036	87.8287	74.4	162.229	47.3741
		1037	47.0734	33.46	80.5334				1037	59.6801	51.08	110.76	47.2266
		1038	22.7415	30.48	53.2215				1038	66.0413	34.6	100.641	54.1023
		1039	49.4588	32.02	81.4788				1039	66.6775	54.44	121.117	47.8995
		1040	42.4614	28.96	71.4214				1040	42.9817	59.82	102.802	40.2864
		1041	38.3266	48.94	87.2666				1041	75.4242	57.98	133.404	48.7568
		1042	32.1244	32.74	64.8644				1042	66.0413	50.64	116.681	48.7924
		1043	3.4987	17.48	20.9787				1043	101.505	64.92	166.425	51.3495
		1044	45.9601	29.84	75.8002				1044	52.5237	26.7	79.2237	54.5118
		1045	37.6905	30.36	68.0505				1045	105.004	71	176.004	50.5698
		1046	15.108	25.32	40.428				1046	61.9065	36.12	98.0265	52.6257
		1047	2.22644	-0.94	1.28644				1047	78.1278	57.46	135.588	49.3839
		1048	11.2912	-1.94	9.35125				1048	126.95	74.16	201.11	52.6091
		1049	26.0812	6.02	32.1012				1049	64.9281	24.76	89.6881	58.3034
		1050	4.13482	8.46	12.5948				1050	52.5237	41.94	94.4637	48.2165
		1051	29.2618	43.34	72.6018				1051	136.174	113.12	249.294	47.6531
		1052	39.9169	42.74	82.6569				1052	110.57	71.96	182.53	51.1059
		1053	18.2886	17.4	35.6886				1053	25.9654	30.12	56.0854	42.8759
		1054	29.898	19.1	48.998				1054	115.5	66.74	182.24	52.7596
		1055	-1.74935	-12.86	-14.6093				1055	80.5132	45.9	126.413	52.9456
		1056	14.1538	-7.12	7.03382				1056	107.072	96.16	203.232	46.5388
		1057	25.9222	20	45.9222				1057	142.854	86.86	229.714	52.0541
		1058	24.3318	23.02	47.3518				1058	72.0845	54.22	126.305	49.0656
		1059	52.9575	28.66	81.6175				1059	63.9739	56.56	120.534	46.7632
		1060	77.6075	43.98	121.587				1060	62.5426	43.74	106.283	50.095
		1061	31.9654	50.7	82.6654				1061	120.271	88.56	208.831	49.3671
		1062	35.6231	7.84	43.4631				1062	41.7095	46.88	88.5895	43.327
		1063	41.3482	31.74	73.0882				1063	33.4398	23.92	57.3599	49.7767
		1064	44.5289	49.72	94.2489				1064	110.093	69.2	179.293	51.592
		1065	32.2834	19.7	51.9834				1065	75.4242	65.7	141.124	46.9756
		1066	11.7683	9.22	20.9883				1066	84.33	55.42	139.75	50.9695
		1067	-2.70354	7.9	5.19646				1067	129.813	92.16	221.973	49.8831
		1068	-5.88417	-4.78	-10.6642				1068	99.7561	62.46	162.216	51.6461
		1069	2.38547	14.88	17.2655				1069	108.821	75.8	184.621	50.1516
		1070	6.0432	10.28	16.3232				1070	52.6827	35.06	87.7427	50.7932
		1071	26.7173	17.18	43.8973				1071	131.244	82.96	214.204	51.5136
		1072	63.7717	24.6	88.3717				1072	66.5184	50.98	117.498	48.7996
		1073	29.898	20.84	50.7379				1073	60.1572	23.14	83.2972	58.1924
		1074	44.8469	32.74	77.5869				1074	99.7561	84.66	184.416	47.3477
		1075	33.3967	44.9	78.2966				1075	70.3352	62.54	132.875	46.6816
		1076	-4.13482	11.5	7.36518				1076	57.6127	50.6	108.213	46.8578
		1077	20.356	-18.4	1.95605				1077	27.3967	14.94	42.3366	53.5556
		1078	5.08901	4.88	9.96901				1078	73.9929	69.6	143.593	45.8766
		1079	16.8574	-8.3	8.55736				1079	53.4778	45.48	98.9578	47.3179
		1080	13.8358	0.44	14.2758				1080	71.7665	54.72	126.486	48.8726
		1081	39.5989	40.88	80.4789				1081	60.3162	48.9	109.216	48
		1082	22.1054	-0.12	21.9854				1082	123.293	77.82	201.113	51.5339
		1083	35.305	28.42	63.725				1083	61.7475	51.2	112.947	47.6792
		1084	19.879	25.44	45.319				1084	42.9817	53.48	96.4617	41.876
		1085	-2.38547	4.44	2.05453				1085	114.705	87.1	201.805	48.9311
		1086	41.5073	44.26	85.7673				1086	83.8529	53.06	136.913	51.4988
		1087	16.2212	28.56	44.7812				1087	41.7095	44.82	86.5295	43.97
		1088	28.4667	34.88	63.3467				1088	59.362	46.04	105.402	48.6306
		1089	21.1512	42.12	63.2712				1089	46.6395	30.92	77.5595	50.8468
		1090	27.8305	32.86	60.6905				1090	108.344	60.42	168.764	53.2486
		1091	13.9948	40.06	54.0548				1091	76.3784	50.2	126.578	50.9679
		1092	25.6041	37.38	62.9841				1092	35.5073	37.94	73.4473	44.0509
		1093	40.076	20.22	60.296				1093	54.7501	25.52	80.2701	55.6775
		1094	6.20223	8.16	14.3622				1094	54.273	56.38	110.653	44.4545
		1095	20.197	22.96	43.157				1095	90.2142	58.22	148.434	51.2237
		1096	62.6585	58.66	121.318				1096	80.6723	69.62	150.292	47.1086
		1097	10.6551	20.22	30.8751				1097	21.9896	36.48	58.4696	37.8255
		1098	48.3456	57.72	106.066				1098	54.9091	24.36	79.2691	56.3338
		1099	15.4261	3.88	19.3061				1099	36.4614	34.06	70.5215	45.9757
		1100	24.968	24.94	49.908				1100	119.317	80.9	200.217	50.5312
		1101	7.79255	0.86	8.65255				1101	96.7344	97.18	193.914	44.9342
		1102	24.968	39.44	64.408				1102	60.9523	57.82	118.772	45.7556
		1103	49.7769	45.34	95.1169				1103	84.171	61.3	145.471	49.5228
		1104	37.3724	23.4	60.7724				1104	132.517	86.22	218.737	51.1097
		1105	37.3724	26.36	63.7324				1105	50.2972	58.42	108.717	42.8576
		1106	33.8737	28.88	62.7537				1106	131.721	110.96	242.681	47.4538
		1107	24.968	28.78	53.748				1107	127.587	90.3	217.887	49.9267
		1108	44.3698	65.94	110.31				1108	64.6101	52.4	117.01	47.9949
		1109	0.63613	20.3	20.9361				1109	66.6775	40.02	106.697	52.2341
		1110	43.4156	48.14	91.5556				1110	68.7449	54.6	123.345	48.2925
		1111	36.7363	11.26	47.9963				1111	27.7147	20.76	48.4747	49.1244
		1112	29.898	10.76	40.6579				1112	77.0145	28.02	105.035	58.9024
		1113	20.356	24.62	44.9761				1113	73.3568	72.34	145.697	45.1999
		1114	8.74674	6.02	14.7667				1114	84.9661	56.36	141.326	50.839
		1115	16.5393	11.5	28.0393				1115	108.026	99.82	207.846	46.1313
		1116	24.0138	21.08	45.0938				1116	114.705	103.94	218.645	46.4111
		1117	34.6689	11.44	46.1089				1117	83.3758	59.82	143.196	49.7341
		1118	27.3534	29.54	56.8935				1118	45.8443	42.2	88.0443	46.1861
		1119	8.42868	19.46	27.8887				1119	54.114	30.02	84.134	53.3206
		1120	22.2644	20.96	43.2244				1120	60.6343	45.82	106.454	48.9997
		1121	38.8037	16.52	55.3237				1121	86.5564	69.44	155.996	48.1497
		1122	26.3993	38	64.3993				1122	78.2868	77.58	155.867	45.1299
		1123	4.61192	7.2	11.8119				1123	67.3136	59.98	127.294	46.6514
		1124	17.9706	29.9	47.8706				1124	134.266	109.28	243.546	47.9442
		1125	15.4261	14.26	29.6861				1125	130.926	91.22	222.146	50.1482
		1126	-6.67933	-10.8	-17.4793				1126	107.867	82.02	189.887	48.9116
		1127	7.95158	5.72	13.6716				1127	114.546	67.52	182.066	52.4843
		1128	10.3371	-1.18	9.15706				1128	43.2998	58.44	101.74	40.7209
		1129	7.95158	-0.4	7.55158				1129	53.6369	54.4	108.037	44.7976
		1130	12.0864	11.68	23.7664				1130	118.999	72.78	191.779	51.9728
		1131	3.81676	25.5	29.3168				1131	60.6343	46.04	106.674	48.9317
		1132	-5.08901	0.18	-4.90901				1132	70.6533	60.74	131.393	47.1635
		1133	17.9706	34.16	52.1306				1133	85.7613	70.52	156.281	47.7983
		1134	16.6983	35.54	52.2383				1134	53.0007	61.06	114.061	42.9741
		1135	10.3371	6.9	17.2371				1135	66.6775	46.02	112.697	50.281
		1136	8.26965	6.88	15.1496				1136	117.886	93.68	211.566	48.2849
		1137	11.2912	22.82	34.1112				1137	47.2756	46	93.2756	45.3918
		1138	19.879	10.28	30.159				1138	72.5616	39.2	111.762	53.684
		1139	16.6983	15.66	32.3583				1139	99.279	91	190.279	46.2469
		1140	14.3128	3.6	17.9128				1140	131.403	89.38	220.783	50.4862
		1141	28.7847	4.38	33.1647				1141	100.71	104.52	205.23	44.4682
		1142	-0.79516	-0.28	-1.07516				1142	48.2298	31.58	79.8098	51.0207
		1143	10.3371	-3.7	6.63706				1143	66.6775	63.4	130.077	45.7219
		1144	1.11322	-0.9	0.21322				1144	89.7371	81.24	170.977	46.4243
		1145	6.5203	4.44	10.9603				1145	95.1441	73.28	168.424	48.7295
		1146	20.038	10.62	30.658				1146	61.9065	59.66	121.567	45.5294
		1147	4.29385	0.44	4.73385				1147	75.9013	36.72	112.621	55.1796
		1148	9.38287	2.62	12.0029				1148	58.8849	74.24	133.125	41.6883
		1149	22.4235	-14.9	7.52346				1149	118.681	95.58	214.261	48.0947
		1150	13.5177	-1.06	12.4577				1150	74.311	67.88	142.191	46.2961
		1151	12.0864	16.4	28.4864				1151	35.8253	19.44	55.2653	53.6233
		1152	21.4693	-0.12	21.3493				1152	101.187	85.94	187.127	47.3368
		1153	2.06741	0.86	2.92741				1153	86.7155	75.28	161.995	47.024
		1154	1.43128	24.66	26.0913				1154	116.136	54.1	170.236	55.6857
		1155	19.879	-7.14	12.739				1155	81.9445	50.52	132.465	51.8615
		1156	17.3345	31.16	48.4945				1156	33.1218	34.9	68.0218	44.251
		1157	30.6931	-8.16	22.5331				1157	70.1762	49.66	119.836	49.9288
		1158	13.0406	-2.3	10.7406				1158	94.667	94.2	188.867	45.0708
		1159	28.7847	20.9	49.6847				1159	76.3784	62.98	139.358	47.7586
		1160	34.6689	-10.16	24.5089				1160	74.7881	32.42	107.208	56.6391
		1161	12.4045	6.44	18.8445				1161	64.292	59.58	123.872	46.09
		1162	13.1996	2.4	15.5996				1162	109.139	88.18	197.319	48.0487
		1163	17.3345	0.1	17.4344				1163	81.4674	79.44	160.907	45.361
		1164	2.38547	-0.52	1.86547				1164	25.4883	8.66	34.1483	59.7624
		1165	12.8816	8.82	21.7016				1165	72.4026	45.28	117.683	51.6624
		1166	6.67933	2	8.67933				1166	29.4641	6.84	36.3041	64.2745
		1167	8.90577	11.2	20.1058				1167	68.9039	45.64	114.544	50.8592
		1168	18.2886	23.92	42.2086				1168	39.006	42.62	81.626	43.7312
		1169	23.6957	-0.92	22.7757				1169	65.2462	48.64	113.886	49.1922
		1170	9.5419	19.4	28.9419				1170	64.9281	105.92	170.848	38.0588
		1171	9.70093	14.26	23.9609				1171	55.0682	60.06	115.128	43.7575
		1172	-6.99739	11.2	4.20261				1172	42.5047	32.3	74.8047	48.9203
		1173	12.0864	6.06	18.1464				1173	12.4477	27.64	40.0877	33.8648
		1174	8.58771	5.34	13.9277				1174	75.9013	63.36	139.261	47.5834
		1175	4.92998	-3.16	1.76998				1175	56.8175	42.96	99.7775	48.9916
		1176	-4.13482	9.56	5.42518				1176	101.664	77.54	179.204	48.8683
		1177	21.6283	5.26	26.8883				1177	76.2194	48.42	124.639	51.4438
		1178	8.74674	11	19.7467				1178	72.7207	63.9	136.621	46.8509
		1179	7.31546	6.4	13.7155				1179	98.9609	94.9	193.861	45.6001
		1180	8.42868	-5.5	2.92868				1180	67.7907	28.38	96.1707	57.0961
		1181	-8.26965	18.36	10.0904				1181	763.395	12.92	776.315	82.5878
		1182	17.9706	13.02	30.9906				1182	998.921	47.88	1046.8	77.6509
		1183	25.7631	2.98	28.7431				1183	642.849	36.66	679.509	76.5691
		1184	24.4909	22.12	46.6109				1184	1044.4	33.2	1077.6	79.8908
		1185	13.8358	20.42	34.2557				1185	1031.36	28.78	1060.14	80.5165
		1186	17.1754	7.82	24.9954				1186	649.21	18.28	667.49	80.4744
		1187	10.178	-12.6	-2.42197				1187	45.0492	33.68	78.7292	49.1515
		1188	23.6957	13.16	36.8557				1188	97.0525	71.22	168.273	49.4154
		1189	38.4857	9.86	48.3457				1189	99.1199	79.84	178.96	48.0923
		1190	0.31806	14.04	14.3581				1190	31.3724	18.7	50.0724	52.33
		1191	38.0086	11.12	49.1286				1191	92.7587	72.64	165.399	48.4933
		1192	18.1296	46.76	64.8896				1192	39.8011	30.94	70.7411	48.5979
		1193	23.3776	19.84	43.2176				1193	117.409	79.62	197.029	50.5287
		1194	13.6767	12.34	26.0167				1194	49.8201	20.58	70.4001	57.2704
		1195	35.4641	15.44	50.9041				1195	63.6559	51.08	114.736	48.1463
		1196	14.4719	10.08	24.5519				1196	58.7259	54.64	113.366	46.0327
		1197	37.5315	21.98	59.5115				1197	62.7017	60.54	123.242	45.5025
		1198	23.2186	-5.26	17.9586				1198	49.343	50.6	99.943	44.6397
		1199	21.7873	18.72	40.5073				1199	98.4838	63.22	161.704	51.298
		1200	5.72514	-6.24	-0.51486				1200	85.6022	93.14	178.742	43.7915
		1201	20.038	9.46	29.498				1201	106.117	91.12	197.237	47.1804
		1202	26.5583	-7.38	19.1783				1202	43.4588	34.52	77.9788	48.2912
		1203	23.8547	25.88	49.7347				1203	66.2004	42.38	108.58	51.3363
		1204	26.0812	15.5	41.5812				1204	35.8253	38.74	74.5653	43.8799
		1205	29.4209	8.48	37.9009				1205	53.3188	43.14	96.4588	48.0287
		1206	36.7363	9.7	46.4363				1206	89.1009	50	139.101	53.1629
		1207	8.58771	14.72	23.3077				1207	82.4216	54.22	136.642	50.9555
		1208	12.4045	6.94	19.3445				1208	40.5963	54.78	95.3763	40.7238
		1209	29.5799	25.82	55.3999				1209	45.0492	54.62	99.6692	42.2448
		1210	11.9274	5.48	17.4074				1210	90.5322	63.3	153.832	50.0983
		1211	-0.79516	22.58	21.7848				1211	115.5	83.96	199.46	49.5491
		1212	33.0786	31.46	64.5386				1212	143.808	93	236.808	51.1947
		1213	19.4019	23.98	43.3819				1213	38.3698	34.16	72.5298	46.6637
		1214	15.5851	-5.92	9.6651				1214	55.5453	49	104.545	46.7947
		1215	16.5393	1.42	17.9593				1215	66.6775	62.52	129.197	45.922
		1216	5.24804	17.82	23.068				1216	92.1225	27.48	119.603	61.3581
		1217	17.6525	24.96	42.6125				1217	132.835	113.58	246.415	47.2408
		1218	24.1728	9.22	33.3928				1218	70.6533	78.76	149.413	43.4449
		1219	36.4183	6.14	42.5583				1219	51.2514	71.04	122.291	40.3439
		1220	16.5393	9.32	25.8593				1220	52.8417	50.42	103.262	45.6719
		1221	2.22644	-11.68	-9.45356				1221	93.2357	32.4	125.636	59.4808
		1222	18.1296	3.32	21.4496				1222	82.4216	97.84	180.262	42.5466
		1223	10.3371	10.32	20.6571				1223	66.6775	55.5	122.177	47.6245
		1224	3.65773	2.58	6.23773				1224	49.0249	39.98	89.0049	47.9163
		1225	-1.27225	5.74	4.46775				1225	73.0387	65.26	138.299	46.6122
		1226	0.31806	10.04	10.3581				1226	81.1493	61.4	142.549	48.9818
		1227	23.2186	-0.4	22.8186				1227	60.9523	42.76	103.712	50.0513
		1228	0.95419	3.24	4.19419				1228	55.7043	51.72	107.424	46.0628
		1229	21.3102	-18.14	3.17024				1229	57.6127	40.04	97.6527	50.1834
		1230	1.74935	0.74	2.48935				1230	99.1199	99.98	199.1	44.8762
		1231	11.2912	-9.84	1.45125				1231	40.7553	51.88	92.6353	41.5513
		1232	17.4935	-0.96	16.5335				1232	56.3404	24.56	80.9004	56.5655
		1233	12.0864	-4.7	7.38641				1233	81.6264	45.18	126.806	53.3517
		1234	14.1538	6.18	20.3338				1234	75.5832	60.86	136.443	48.0973
		1235	3.0216	-7.04	-4.0184				1235	79.4	64.56	143.96	47.9584
		1236	24.8089	-1.1	23.7089				1236	41.7095	25.98	67.6895	51.7185
		1237	26.8763	19.4	46.2764				1237	103.573	76.68	180.253	49.2901
		1238	11.2912	1.76	13.0512				1238	78.2868	85.84	164.127	43.6811
		1239	8.58771	-5.16	3.42771				1239	70.4942	47.56	118.054	50.601
		1240	12.5635	-14.14	-1.5765				1240	99.279	83.82	183.099	47.4216
		1241	-1.74935	17.14	15.3907				1241	48.3888	57.9	106.289	42.433
		1242	11.7683	12.26	24.0283				1242	86.2384	61.36	147.598	49.8519
		1243	11.9274	15.86	27.7874				1243	59.203	30.54	89.743	54.313
		1244	10.3371	1.52	11.8571				1244	77.6506	45.62	123.271	52.5303
		1245	1.90838	-9.06	-7.15162				1245	36.3024	30.52	66.8224	47.4821
		1246	23.3776	14.72	38.0977				1246	36.3024	41.62	77.9224	43.0435
		1247	2.06741	6	8.06741				1247	33.9169	49.76	83.677	39.543
		1248	22.4235	12.16	34.5835				1248	26.6015	23.18	49.7815	46.9705
		1249	19.2428	8.94	28.1828				1249	38.2108	41.96	80.1708	43.6598
		1250	1.74935	-1.74	0.00935				1250	43.7769	48.62	92.3969	43.4977
		1251	24.8089	-0.34	24.4689				1251	24.057	37.88	61.937	38.5521
		1252	38.9628	-3.82	35.1428				1252	27.5557	45.2	72.7557	37.9825
		1253	12.0864	6.78	18.8664				1253	20.8763	26.02	46.8963	41.8515
		1254	3.81676	-17.68	-13.8632				1254	49.184	57.28	106.464	42.8194
		1255	4.92998	15.7	20.63				1255	43.1408	18.92	62.0608	56.4858
		1256	22.9006	3.82	26.7206				1256	49.502	28.92	78.422	52.6078
		1257	6.20223	2.84	9.04223				1257	46.6395	33.5	80.1395	49.7183
		1258	16.8574	0.18	17.0374				1258	41.7095	24.66	66.3695	52.4427
		1259	14.1538	-2.76	11.3938				1259	54.114	44.16	98.274	47.9067
		1260	30.3751	6.72	37.0951				1260	71.1304	65.26	136.39	46.2334
		1261	5.24804	7.42	12.668				1261	30.7363	42.8	73.5363	40.279
		1262	14.4719	5.78	20.2519				1262	64.292	42.3	106.592	50.9534
		1263	15.4261	7.22	22.6461				1263	52.0466	49.18	101.227	45.8114
		1264	10.4961	-1.06	9.43609				1264	55.7043	43.6	99.3043	48.5006
		1265	6.36127	-13.28	-6.91873				1265	58.4078	53.8	112.208	46.1768
		1266	3.81676	-2.24	1.57676				1266	47.4346	43.82	91.2546	46.135
		1267	23.0596	8.14	31.1996				1267	58.7259	34.5	93.2259	52.5309
		1268	13.6767	0.6	14.2767				1268	37.0976	38.66	75.7576	44.4091
		1269	5.24804	14.42	19.668				1269	25.0112	28.54	53.5512	43.1108
		1270	17.8116	9.8	27.6116				1270	41.3914	46.62	88.0114	43.2971
		1271	3.81676	-2.88	0.93676				1271	42.0276	47.48	89.5076	43.2538
		1272	15.4261	1.76	17.1861				1272	52.8417	41.42	94.2617	48.4798
		1273	9.5419	4.08	13.6219				1273	55.0682	43.42	98.4882	48.3961
		1274	2.22644	1.16	3.38644				1274	41.5505	37.28	78.8305	46.5527
		1275	-3.18063	1	-2.18063				1275	52.5237	25.26	77.7836	55.2591
		1276	14.949	4.2	19.149				1276	38.5289	30.06	68.5889	48.5463
		1277	6.67933	16.2	22.8793				1277	23.898	47.76	71.6579	35.2745
		1278	4.92998	-15.42	-10.49				1278	58.4078	25.4	83.8078	56.5972
		1279	14.1538	-0.76	13.3938				1279	48.5479	23.92	72.4679	54.9337
		1280	8.90577	-5.3	3.60577				1280	33.9169	45.88	79.7969	40.6889
		1281	10.3371	4.3	14.6371				1281	16.1054	40	56.1054	32.3966
		1282	9.0648	4.3	13.3648				1282	32.9628	40.08	73.0428	42.2041
		1283	25.286	6.38	31.666				1283	36.3024	31.4	67.7024	47.0763
		1284	3.4987	4.96	8.4587				1284	28.8279	31.1	59.9279	43.9136
		1285	14.7899	7.78	22.5699				1285	33.9169	34.06	67.977	44.9397
		1286	8.58771	-5.78	2.80771				1286	26.6015	60	86.6015	33.6577
		1287	1.11322	1.72	2.83322				1287	37.8927	39.76	77.6527	44.3111
		1288	23.0596	4.68	27.7396				1288	18.6499	39.2	57.8499	34.5962
		1289	25.4451	18.14	43.5851				1289	30.7363	42.44	73.1763	40.3984
		1290	1.11322	-10.88	-9.76678				1290	29.6231	49.32	78.9431	37.7758
		1291	27.5125	-3.98	23.5325				1291	34.8711	30.22	65.0911	47.0488
		1292	17.0164	12.48	29.4964				1292	27.2376	53.68	80.9176	35.4632
		1293	17.0164	0.22	17.2364				1293	26.2834	45.44	71.7234	37.2544
		1294	19.7199	-1.74	17.9799				1294	32.4857	44.18	76.6657	40.613
		1295	20.9922	7.86	28.8522				1295	45.8443	38.68	84.5243	47.4311
		1296	15.4261	9.64	25.0661				1296	47.2756	30.94	78.2156	51.0276
		1297	1.27225	3.1	4.37225				1297	13.4019	42.42	55.8219	29.3394
		1298	2.54451	5.4	7.94451				1298	35.8253	28.3	64.1253	48.3697
		1299	8.26965	-20.66	-12.3903				1299	31.8495	38.92	70.7695	42.133
		1300	11.1322	-2.08	9.05222				1300	28.3508	38.38	66.7308	40.678
		1301	20.6741	-4.74	15.9341				1301	50.7743	47.82	98.5943	45.8585
		1302	-1.11322	-3.26	-4.37322				1302	42.8227	48.76	91.5827	43.1415
		1303	24.8089	11.8	36.6089				1303	45.0492	49.62	94.6692	43.6163
		1304	17.6525	9.44	27.0925				1304	50.2972	41.14	91.4372	47.8738
		1305	22.2644	15.38	37.6444				1305	43.9359	30.32	74.2559	50.2829
		1306	29.898	-4.62	25.278				1306	28.5099	20.44	48.9499	49.7445
		1307	5.72514	-13.4	-7.67486				1307	21.3534	17.52	38.8734	47.8297
		1308	10.9732	-9.32	1.65318				1308	39.483	20.84	60.3231	54.0011
		1309	32.9196	-2.82	30.0996				1309	38.8469	19.24	58.0869	54.8637
		1310	6.67933	14.94	21.6193				1310	33.4398	34.94	68.3799	44.3715
		1311	19.2428	1.78	21.0228				1311	55.7043	35.56	91.2643	51.3758
		1312	1.90838	16.68	18.5884				1312	32.8037	51.68	84.4837	38.5447
		1313	2.86257	4.26	7.12257				1313	48.3888	51.86	100.249	44.0078
		1314	22.9006	3.16	26.0606				1314	42.1866	40.66	82.8466	45.5279
		1315	6.0432	-13.26	-7.2168				1315	67.1546	39.2	106.355	52.6194
		1316	9.38287	6.64	16.0229				1316	32.8037	54.8	87.6037	37.729
		1317	22.5825	5.74	28.3225				1317	16.4235	38.36	54.7835	33.1977
		1318	9.22384	2.04	11.2638				1318	40.7553	35.88	76.6353	46.8237
		1319	8.90577	5.26	14.1658				1319	46.0033	53.22	99.2233	42.9146
		1320	-0.63613	6.08	5.44387				1320	32.1676	37.14	69.3076	42.9429
		1321	20.356	10.68	31.036				1321	22.9438	33.84	56.7838	39.4684
		1322	14.3128	8.92	23.2328				1322	35.1892	45.62	80.8092	41.2918
		1323	13.8358	-8.92	4.91575				1323	23.898	1.48	25.3779	76.0254
		1324	16.0622	-2.12	13.9422				1324	28.3508	44.56	72.9108	38.5775
		1325	10.178	0.3	10.478				1325	31.3724	41.08	72.4524	41.15
		1326	8.74674	-11.54	-2.79326				1326	29.146	26.8	55.946	46.2017
		1327	14.3128	-9.78	4.53285				1327	41.3914	30.14	71.5314	49.5249
		1328	6.83836	3	9.83836				1328	25.0112	31.42	56.4312	41.7395
		1329	16.2212	-10.54	5.68123				1329	49.184	35.76	84.944	49.5464
		1330	15.5851	14.46	30.0451				1330	49.9791	35.48	85.4591	49.8841
		1331	-5.08901	12.5	7.41099				1331	46.4804	36.5	82.9805	48.454
		1332	-6.20223	7.6	1.39777				1332	45.8443	46.94	92.7843	44.6617
		1333	-0.79516	-8.74	-9.53516				1333	90.8503	58.98	149.83	51.1406
		1334	4.13482	-2.44	1.69482				1334	14.197	34.9	49.097	32.5298
		1335	2.38547	-5.56	-3.17453				1335	54.7501	54.2	108.95	45.1446
		1336	-9.38287	-1.2	-10.5829				1336	54.5911	55.98	110.571	44.6401
		1337	6.0432	10.6	16.6432				1337	30.7363	49.18	79.9163	38.3283
		1338	-0.15903	-6.4	-6.55903				1338	46.0033	29.52	75.5233	51.3033
		1339	-1.43128	10.36	8.92872				1339	46.7985	26.26	73.0585	53.1636
		1340	-2.38547	9.66	7.27453				1340	87.1925	51.54	138.733	52.4457
		1341	9.70093	11.22	20.9209				1341	53.9549	39.06	93.0149	49.6074
		1342	4.77095	6.28	11.051				1342	56.3404	30.76	87.1004	53.5395
		1343	-0.63613	9.7	9.06387				1343	72.8797	31.96	104.84	56.4868
		1344	11.4503	-10.4	1.05028				1344	96.8935	62.02	158.913	51.3383
		1345	15.9032	7.82	23.7232				1345	60.4752	58	118.475	45.5986
		1346	7.79255	-2.8	4.99255				1346	66.6775	67.58	134.257	44.8074
		1347	22.4235	10.92	33.3435				1347	76.8555	41.34	118.195	53.7433
		1348	20.5151	1.96	22.4751				1348	38.6879	62.06	100.748	38.293
		1349	-7.47449	25.18	17.7055				1349	73.8339	47.52	121.354	51.2616
		1350	-7.63352	3.16	-4.47352				1350	41.7095	35.3	77.0095	47.3871
		1351	7.47449	12.04	19.5145				1351	74.311	52.88	127.191	49.8501
		1352	10.4961	-5.32	5.17609				1352	94.0309	52.76	146.791	53.1646
		1353	7.47449	1.02	8.49449				1353	86.0793	75.68	161.759	46.843
		1354	20.8331	13.24	34.0731				1354	74.152	34.14	108.292	55.8418
		1355	13.9948	-1.92	12.0748				1355	73.3568	39.96	113.317	53.5704
		1356	8.58771	-2.82	5.76771				1356	39.9601	27.46	67.4202	50.3424
		1357	5.40708	-12.6	-7.19292				1357	44.7311	35.9	80.6311	48.144
		1358	2.86257	8.54	11.4026				1358	43.1408	32.72	75.8608	48.9478
		1359	5.88417	26	31.8842				1359	36.3024	60.1	96.4024	37.8542
		1360	0.31806	-9.84	-9.52194				1360	53.1598	32.82	85.9798	51.8419
		1361	-2.70354	1.34	-1.36354				1361	33.4398	43.4	76.8398	41.2761
		1362	1.90838	-8.8	-6.89162				1362	40.9143	35.64	76.5543	46.9753
		1363	13.8358	-7.88	5.95575				1363	72.0845	43.76	115.845	52.0763
		1364	-11.2912	5.12	-6.17125				1364	67.3136	73.56	140.874	43.7293
		1365	1.74935	10.44	12.1893				1365	75.2652	35.6	110.865	55.4819
		1366	-8.42868	9.68	1.25132				1366	30.5773	38.04	68.6173	41.8781
		1367	9.0648	5.9	14.9648				1367	40.2782	18.68	58.9582	55.7448
		1368	2.38547	19.76	22.1455				1368	28.0328	20.48	48.5128	49.4783
		1369	-0.95419	20.26	19.3058				1369	35.3482	31.44	66.7882	46.6773
		1370	9.38287	4.48	13.8629				1370	33.5989	1.62	35.2189	77.6155
		1371	13.1996	-2.62	10.5796				1371	65.0871	40.66	105.747	51.6778
		1372	-4.61192	1.52	-3.09192				1372	102.301	28.62	130.921	62.1244
		1373	12.8816	-2.48	10.4016				1373	98.3248	44.5	142.825	56.0696
		1374	14.1538	-8.2	5.95382				1374	75.9013	35.9	111.801	55.4822
		1375	11.7683	5.22	16.9883				1375	82.8987	36.56	119.459	56.4121
		1376	13.6767	6.44	20.1167				1376	93.3948	58.32	151.715	51.6835
		1377	5.56611	-3.76	1.80611				1377	75.1061	33.12	108.226	56.4134
		1378	6.83836	4.46	11.2984				1378	90.3732	36.34	126.713	57.6203
		1379	-10.019	4.64	-5.37899				1379	114.069	47.06	161.129	57.2871
		1380	0.31806	-2.78	-2.46194				1380	112.956	27.4	140.356	63.779
		1381	1.90838	-3.32	-1.41162				1381	83.6938	39.34	123.034	55.5655
		1382	-2.38547	-6.74	-9.12547				1382	98.6428	34.08	132.723	59.5537
		1383	-2.06741	9.58	7.51259				1383	84.33	48.76	133.09	52.7507
		1384	0.79516	19.6	20.3952				1384	103.573	48.8	152.373	55.5337
		1385	9.70093	5.68	15.3809				1385	80.6723	29.3	109.972	58.9243
		1386	-2.22644	-13.38	-15.6064				1386	121.702	36.2	157.902	61.3925
		1387	9.22384	-6.68	2.54384				1387	60.7933	37.86	98.6533	51.7211
		1388	10.8141	-6.92	3.89415				1388	97.8477	36.36	134.208	58.634
		1389	17.1754	-0.62	16.5554				1389	101.346	35.3	136.646	59.4518
		1390	7.31546	12.32	19.6355				1390	113.433	30.92	144.353	62.4311
		1391	16.6983	4.76	21.4583				1391	90.3732	51.72	142.093	52.8925
		1392	-7.47449	-16.96	-24.4345				1392	94.9851	50.74	145.725	53.8376
		1393	3.33966	-7.1	-3.76034				1393	82.5806	52.86	135.441	51.338
		1394	-8.26965	-5.52	-13.7896				1394	101.505	47.54	149.045	55.6138
		1395	2.22644	-3.88	-1.65356				1395	71.9255	65.58	137.506	46.3225
		1396	18.9248	-21.38	-2.45523				1396	156.848	72.24	229.088	55.837
		1397	0.31806	-15.68	-15.3619				1397	79.559	29.58	109.139	58.6271
		1398	-4.13482	14.2	10.0652				1398	75.9013	27.22	103.121	59.0846
		1399	12.5635	-5.52	7.0435				1399	94.508	58.72	153.228	51.7534
		1400	2.06741	11.46	13.5274				1400	121.066	57.72	178.786	55.3757
		1401	9.38287	11.08	20.4629				1401	76.0603	36.2	112.26	55.3989
		1402	3.65773	1.52	5.17773				1402	83.0577	35.6	118.658	56.7877
		1403	-13.3587	-9.54	-22.8987				1403	56.8175	20.4	77.2175	59.0698
		1404	14.3128	-1.7	12.6128				1404	129.018	76.8	205.818	52.3486
		1405	10.4961	-8.88	1.61609				1405	147.147	97.62	244.767	50.8371
		1406	0.47709	27.68	28.1571				1406	184.52	96.3	280.82	54.1548
		1407	1.90838	5.6	7.50838				1407	71.6075	30.66	102.267	56.8015
		1408	8.26965	-5.48	2.78965				1408	84.8071	49.12	133.927	52.727
		1409	-2.54451	-3.88	-6.42451				1409	112.161	64.08	176.241	52.9158
		1410	4.77095	7.16	11.9309				1410	95.1441	33.96	129.104	59.1443
		1411	0.47709	13.16	13.6371				1411	54.432	5.78	60.212	71.9511
		1412	7.79255	-1.42	6.37255				1412	128.382	46.28	174.662	59.0191
		1413	7.79255	-5.92	1.87255				1413	130.131	58.94	189.071	56.0595
		1414	3.65773	6.68	10.3377				1414	138.878	94.68	233.558	50.4541
		1415	3.0216	5.46	8.4816				1415	110.57	31.58	142.15	61.8788
		1416	1.27225	-4.62	-3.34775				1416	119.794	42	161.794	59.3695
		1417	1.11322	-12.52	-11.4068				1417	127.587	69.84	197.427	53.5037
		1418	7.31546	3.66	10.9755				1418	98.4838	62.34	160.824	51.4938
		1419	10.3371	11.28	21.6171				1419	96.2574	35.26	131.517	58.8162
		1420	5.88417	10.36	16.2442				1420	64.133	32.16	96.293	54.6963
		1421	13.8358	-12.5	1.33575				1421	112.638	59.4	172.038	54.0131
		1422	10.3371	0.44	10.7771				1422	101.823	29.82	131.643	61.5793
		1423	10.8141	19.62	30.4341				1423	82.8987	28.1	110.999	59.7916
		1424	-3.4987	-9.68	-13.1787				1424	97.6886	81.84	179.529	47.5323
		1425	11.1322	16.76	27.8922				1425	103.732	93.16	196.892	46.5389
		1426	11.7683	-13.48	-1.71166				1426	93.0767	22.82	115.897	63.6577
		1427	24.0138	0.88	24.8938				1427	78.7639	24.78	103.544	60.7118
		1428	9.70093	10.06	19.7609				1428	98.8019	39.92	138.722	57.5582
		1429	-16.8574	1.14	-15.7174				1429	68.7449	31.8	100.545	55.7791
		1430	-3.33966	0.72	-2.61966				1430	111.524	65.54	177.064	52.5263
		1431	2.06741	-7.92	-5.85259				1431	242.566	156.16	398.726	51.2578
		1432	-0.31806	7.78	7.46194				1432	83.5348	43.84	127.375	54.079
		1433	0.15903	7.68	7.83903				1433	68.4268	27.68	96.1068	57.5429
		1434	2.06741	1.08	3.14741				1434	139.673	99.24	238.913	49.8717
		1435	7.63352	1.42	9.05352				1435	95.9393	62.28	158.219	51.1414
		1436	2.54451	4.8	7.34451				1436	90.6912	48.64	139.331	53.7831
		1437	-14.1538	-1.18	-15.3338				1437	117.568	68.02	185.588	52.7422
		1438	11.6093	-8.54	3.06931				1438	116.454	67.54	183.994	52.7086
		1439	20.197	7.26	27.457				1439	72.7207	44.16	116.881	52.0719
		1440	-5.08901	7.16	2.07099				1440	101.346	48.48	149.826	55.3309
		1441	-10.6551	-15.42	-26.0751				1441	101.505	58.68	160.185	52.7533
		1442	7.95158	-12.78	-4.82842				1442	128.064	56.1	184.164	56.5009
		1443	11.7683	1.58	13.3483				1443	228.89	93.1	321.99	57.4716
		1444	4.92998	-1.42	3.50998				1444	151.759	100.14	251.899	50.9124
		1445	1.74935	-6.08	-4.33065				1445	124.883	68.72	193.603	53.4318
		1446	19.4019	-3.66	15.7419				1446	109.139	75.18	184.319	50.3084
		1447	-2.86257	-4.22	-7.08257				1447	146.034	73.98	220.014	54.5585
		1448	10.8141	12.38	23.1942				1448	127.746	100.62	228.366	48.4109
		1449	-0.79516	-3.72	-4.51516				1449	130.29	69.72	200.01	53.814
		1450	-3.4987	-4.94	-8.4387				1450	99.279	71.66	170.939	49.6491
		1451	12.2454	0.1	12.3454				1451	184.202	122.98	307.182	50.7481
		1452	14.1538	-0.66	13.4938				1452	184.997	136.78	321.777	49.309
		1453	-0.47709	5.26	4.78291				1453	192.949	138.52	331.469	49.7255
		1454	-8.42868	8.88	0.45132				1454	152.077	62.42	214.497	57.3538
		1455	3.65773	5.14	8.79773				1455	79.0819	66.4	145.482	47.5005
		1456	5.24804	-8.84	-3.59196				1456	237.159	165.64	402.799	50.1137
		1457	6.5203	16.06	22.5803				1457	209.806	153.62	363.426	49.4468
		1458	1.43128	9.92	11.3513				1458	101.346	89.86	191.206	46.722
		1459	2.06741	15.38	17.4474				1459	87.8287	66.22	154.049	49.0318
		1460	6.0432	1.66	7.7032				1460	185.792	111.52	297.312	52.2332
		1461	13.5177	-8	5.51769				1461	212.987	153.88	366.867	49.6357
		1462	17.0164	-7.2	9.81639				1462	146.988	101	247.988	50.3436
		1463	-4.13482	0.66	-3.47482				1463	144.921	60.82	205.741	57.0638
		1464	17.3345	-5.96	11.3744				1464	73.6749	18.66	92.3349	63.2855
		1465	15.108	-5.6	9.50801				1465	115.5	18.76	134.26	68.0496
		1466	16.6983	-9.46	7.23832				1466	79.0819	45.1	124.182	52.9407
		1467	6.20223	5.64	11.8422				1467	172.911	111.52	284.431	51.2323
		1468	3.65773	7.96	11.6177				1468	232.547	127.78	360.327	53.4516
		1469	3.18063	-7.7	-4.51937				1469	67.4726	37.4	104.873	53.3319
		1470	9.38287	1.5	10.8829				1470	120.271	66.12	186.391	53.4447
		1471	-5.24804	0.24	-5.00804				1471	171.638	110.18	281.818	51.2981
		1472	10.9732	2.64	13.6132				1472	200.105	178.38	378.485	46.6453
		1473	8.74674	-13.14	-4.39326				1473	171.32	92.48	263.8	53.6947
		1474	-12.7225	-2.86	-15.5825				1474	162.255	126.74	288.995	48.5295
		1475	-2.86257	9.18	6.31743				1475	110.252	68.96	179.212	51.6606
		1476	-2.22644	-13.08	-15.3064				1476	55.2272	34.42	89.6472	51.7104
		1477	-6.83836	-7.04	-13.8784				1477	160.824	123.92	284.744	48.7234
		1478	4.77095	11.54	16.3109				1478	98.0067	61.16	159.167	51.6926
		1479	9.22384	14.1	23.3238				1479	145.398	75.36	220.758	54.2487
		1480	13.9948	9.42	23.4148				1480	144.921	89.58	234.501	51.8251
		1481	-9.0648	4.68	-4.3848				1481	117.091	51.98	169.071	56.3252
		1482	15.267	-4.46	10.807				1482	84.0119	81.72	165.732	45.3962
		1483	25.7631	2.52	28.2831				1483	121.384	66.48	187.864	53.4965
		1484	4.61192	16.96	21.5719				1484	93.5538	71.86	165.414	48.768
		1485	3.0216	5.2	8.2216				1485	97.5296	70.18	167.71	49.6928
		1486	6.20223	-11.02	-4.81777				1486	174.342	146.04	320.382	47.534
		1487	9.38287	0.04	9.42287				1487	149.692	105.16	254.852	50.0317
		1488	5.88417	-3.76	2.12417				1488	132.835	113.54	246.375	47.2458
		1489	7.18602e-16	-3.34	-3.34				1489	124.247	82.24	206.487	50.869
		1490	23.0596	16.18	39.2396				1490	168.935	94.32	263.255	53.2326
		1491	20.9922	3.88	24.8722				1491	142.695	97.58	240.275	50.4111
		1492	0.95419	8.04	8.99419				1492	141.899	96.66	238.559	50.4658
		1493	6.99739	-9.92	-2.92261				1493	168.14	78.82	246.96	55.6016
		1494	11.4503	-5.52	5.93028				1494	197.72	157.64	355.36	48.238
		1495	4.45289	4.04	8.49289				1495	217.758	183.24	400.998	47.469
		1496	-5.40708	-8.18	-13.5871				1496	155.576	153.18	308.756	45.2223
		1497	11.4503	-8.9	2.55028				1497	238.432	168.76	407.192	49.926
		1498	-6.99739	-7.98	-14.9774				1498	202.331	145.36	347.691	49.7154
		1499	-0.63613	-8.84	-9.47613				1499	192.472	142.96	335.432	49.2441
		1500	1.90838	18.18	20.0884				1500	179.431	126.32	305.751	50.0017
		1501	7.47449	7.46	14.9345				1501	168.617	141.92	310.537	47.4659
		1502	-0.47709	6.1	5.62291				1502	217.28	148.72	366	50.3983
		1503	0.79516	3.38	4.17516				1503	150.487	110.78	261.267	49.3708
		1504	15.5851	-0.22	15.3651				1504	118.522	83.28	201.802	50.0287
		1505	12.2454	-4.36	7.88544				1505	186.587	124.88	311.467	50.7135
		1506	12.8816	-3.98	8.90156				1506	190.086	59.26	249.346	60.8232
		1507	11.6093	-11.66	-0.05069				1507	268.012	166.96	434.972	51.7168
		1508	-1.74935	14.7	12.9506				1508	313.972	192.3	506.272	51.953
		1509	13.3587	-7.84	5.51866				1509	217.439	180.58	398.019	47.6568
		1510	19.4019	8.96	28.3619				1510	174.501	87.88	262.381	54.6385
		1511	8.90577	-4.7	4.20577				1511	123.134	59.32	182.454	55.2361
		1512	-1.74935	-9.94	-11.6893				1512	185.315	152.58	337.895	47.7797
		1513	5.24804	-4.36	0.88804				1513	88.4648	54.12	142.585	51.969
		1514	7.15642	-1.48	5.67642				1514	115.341	65.3	180.641	53.0412
		1515	7.95158	4.5	12.4516				1515	195.652	151.76	347.412	48.6291
		1516	6.67933	-6.16	0.51933				1516	96.8935	73.92	170.813	48.8647
		1517	8.58771	-1.3	7.28771				1517	87.0335	23.9	110.934	62.3441
		1518	8.90577	12.66	21.5658				1518	105.64	46.76	152.4	56.3639
		1519	0.15903	-5.92	-5.76097				1519	128.064	86.92	214.984	50.5167
		1520	-2.06741	0	-2.06741				1520	145.398	63.88	209.278	56.4623
		1521	15.267	18.4	33.667				1521	93.5538	65.46	159.014	50.0881
		1522	13.3587	-2.02	11.3387				1522	157.644	74.9	232.544	55.4218
		1523	3.65773	-5.7	-2.04227				1523	127.905	57.04	184.945	56.265
		1524	14.1538	8.88	23.0338				1524	110.411	68.72	179.131	51.7293
		1525	20.038	4.7	24.738				1525	171.002	155.14	326.142	46.3939
		1526	6.99739	6.62	13.6174				1526	171.161	100.54	271.701	52.5327
		1527	12.5635	-0.54	12.0235				1527	82.4216	44.28	126.702	53.7599
		1528	0.63613	13.18	13.8161				1528	124.565	51.78	176.345	57.1886
		1529	6.99739	-6.2	0.79739				1529	166.549	78.98	245.529	55.4475
		1530	10.019	10.72	20.739				1530	134.107	62.2	196.307	55.7437
		1531	17.8116	0.68	18.4916				1531	157.644	98.7	256.344	51.6468
		1532	18.7657	10.54	29.3057				1532	191.994	124.5	316.494	51.1566
		1533	5.72514	-7.02	-1.29486				1533	150.328	49.44	199.768	60.1665
		1534	-13.6767	8.02	-5.65672				1534	100.71	43.02	143.73	56.8322
		1535	19.2428	5.14	24.3828				1535	118.045	64.18	182.225	53.5966
		1536	-13.1996	2.5	-10.6996				1536	111.047	41.26	152.307	58.6355
		1537	12.4045	-7.76	4.64447				1537	154.781	60.02	214.801	58.0889
		1538	13.8358	-2.98	10.8558				1538	153.986	103.5	257.486	50.6537
		1539	13.3587	0.14	13.4987				1539	93.3948	71.16	164.555	48.8828
		1540	5.88417	-0.66	5.22417				1540	139.514	60.5	200.014	56.6343
		1541	4.29385	21.48	25.7738				1541	139.037	47.4	186.437	59.7202
		1542	11.2912	-12.88	-1.58875				1542	119.317	63.04	182.357	53.9877
		1543	14.6309	5.06	19.6909				1543	114.546	66.52	181.066	52.6906
		1544	9.70093	-5.42	4.28093				1544	86.7155	32.5	119.215	58.525
		1545	10.4961	6.24	16.7361				1545	93.8719	44.28	138.152	55.5184
		1546	10.4961	-7.48	3.01609				1546	150.169	85.4	235.569	52.9794
		1547	13.9948	-12.6	1.39479				1547	121.225	59.32	180.545	55.0262
		1548	17.1754	-5.74	11.4354				1548	121.225	66.6	187.825	53.4538
		1549	14.6309	1.88	16.5109				1549	155.894	114.28	270.174	49.4302
		1550	3.33966	3.3	6.63966				1550	139.037	71.04	210.077	54.4427
		1551	-1.27225	-4.74	-6.01225				1551	119.635	30.58	150.215	63.1798
		1552	2.86257	22.22	25.0826				1552	115.5	74.52	190.02	51.2272
		1553	24.0138	-0.64	23.3738				1553	94.508	71.54	166.048	48.9754
		1554	4.29385	11.88	16.1739				1554	133.789	74.34	208.129	53.2984
		1555	0.15903	6.06	6.21903				1555	97.8477	59.56	157.408	52.0389
		1556	-7.31546	6.86	-0.45546				1556	200.264	130.92	331.184	51.0431
		1557	0.95419	3.4	4.35419				1557	163.369	92.08	255.449	53.1024
		1558	20.8331	14.7	35.5331				1558	135.061	87.76	222.821	51.1281
		1559	11.4503	16.46	27.9103				1559	113.433	75.16	188.593	50.8544
		1560	4.13482	7.3	11.4348				1560	206.625	118.78	325.405	52.8308
		1561	10.4961	2.44	12.9361				1561	250.995	188.3	439.295	49.1026
		1562	25.127	-4.12	21.007				1562	155.894	109.46	265.354	50.039
		1563	3.18063	4.28	7.46063				1563	95.3032	123.52	218.823	41.2956
		1564	28.6257	0.1	28.7257				1564	221.415	143.28	364.695	51.1857
		1565	6.67933	-12.6	-5.92067				1565	107.231	51.62	158.851	55.2461
		1566	5.24804	-0.9	4.34804				1566	169.571	119.26	288.831	50.0157
		1567	7.79255	-14.02	-6.22745				1567	149.056	102.64	251.696	50.3134
		1568	10.6551	-4.82	5.83512				1568	178.318	144.18	322.498	48.0382
		1569	11.6093	6.34	17.9493				1569	177.204	143	320.204	48.066
		1570	16.5393	14.66	31.1993				1570	237.796	162.88	400.676	50.3881
		1571	12.2454	-1.48	10.7654				1571	192.79	121.78	314.57	51.5231
		1572	7.95158	0.92	8.87158				1572	118.681	46.44	165.121	57.9723
		1573	22.2644	-10.3	11.9644				1573	140.309	43.22	183.529	60.9694
		1574	19.7199	-10.48	9.23993				1574	213.305	125.9	339.205	52.4661
		1575	6.99739	-15.16	-8.16261				1575	120.112	55.66	175.772	55.7555
		1576	-0.15903	-12.48	-12.639				1576	109.139	77.8	186.939	49.8254
		1577	21.1512	15.3	36.4512				1577	208.057	197.56	405.617	45.7414
		1578	12.0864	25.42	37.5064				1578	149.533	84.06	233.593	53.1386
		1579	7.79255	17.94	25.7325				1579	134.743	75.74	210.483	53.1397
		1580	11.6093	-10.94	0.66931				1580	229.049	145.06	374.109	51.4868
		1581	17.0164	13.18	30.1964				1581	165.277	89.04	254.317	53.7219
		1582	6.83836	20.42	27.2584				1582	148.102	80.02	228.122	53.6821
		1583	6.36127	-0.3	6.06127				1583	201.695	153.94	355.635	48.8586
		1584	0.47709	31.7	32.1771				1584	130.29	92.4	222.69	49.8982
		1585	2.22644	-3.84	-1.61356				1585	132.994	69.68	202.674	54.1017
		1586	11.2912	-5.88	5.41125				1586	184.679	139.68	324.359	48.9872
		1587	-7.63352	-4.34	-11.9735				1587	95.1441	65.88	161.024	50.2355
		1588	12.5635	-5.32	7.2435				1588	141.74	107.4	249.14	48.9613
		1589	16.2212	8.96	25.1812				1589	189.927	135.7	325.627	49.7931
		1590	16.8574	3.06	19.9174				1590	98.8019	75.72	174.522	48.8
		1591	16.0622	-10.84	5.2222				1591	100.869	67.08	167.949	50.8032
		1592	7.47449	8.78	16.2545				1592	81.9445	48.92	130.865	52.3085
		1593	9.70093	6.56	16.2609				1593	166.39	74.44	240.83	56.2228
		1594	7.15642	19.74	26.8964				1594	119.317	77.32	196.637	51.166
		1595	4.61192	-2.56	2.05192				1595	67.1546	46.12	113.275	50.3508
		1596	3.65773	-8.04	-4.38227				1596	248.451	139.62	388.071	53.1432
		1597	2.22644	5.56	7.78644				1597	54.432	34.74	89.172	51.379
		1598	6.36127	4.88	11.2413				1598	136.651	78.88	215.531	52.7739
		1599	-0.15903	9.64	9.48097				1599	210.442	133.26	343.702	51.4885
		1600	-3.97579	4.64	0.66421				1600	131.88	70.92	202.8	53.7466
		1601	-1.11322	-16.36	-17.4732				1601	68.2678	20.32	88.5878	61.3843
		1602	10.9732	6.98	17.9532				1602	123.611	45.62	169.231	58.7211
		1603	6.36127	3.72	10.0813				1603	87.1925	31.52	118.713	58.9837
		1604	10.3371	11.9	22.2371				1604	84.8071	27	111.807	60.5665
		1605	13.5177	-4.06	9.45769				1605	113.592	33	146.592	61.6756
		1606	28.1486	7.56	35.7086				1606	78.4458	34.98	113.426	56.2663
		1607	9.70093	-10.38	-0.67907				1607	104.845	34.84	139.685	60.0385
		1608	27.5125	-4.56	22.9525				1608	100.869	48.94	149.809	55.1408
		1609	6.5203	6.06	12.5803				1609	124.724	45.54	170.264	58.8573
		1610	14.6309	-0.76	13.8709				1610	132.517	27.54	160.057	65.4929
		1611	15.5851	0.52	16.1051				1611	179.431	147.88	327.311	47.7658
		1612	21.4693	5.02	26.4893				1612	120.271	55.14	175.411	55.8981
		1613	29.2618	1.62	30.8818				1613	147.625	82.54	230.165	53.2129
		1614	19.2428	-5.66	13.5828				1614	338.463	179.38	517.843	53.9454
		1615	3.18063	-6.06	-2.87937				1615	438.016	237.58	675.596	53.6292
		1616	1.59032	13.78	15.3703				1616	429.747	203.7	633.447	55.4535
		1617	17.8116	3.36	21.1715				1617	506.4	156.24	662.64	60.9498
		1618	7.63352	11.44	19.0735				1618	395.078	185.14	580.218	55.6062
		1619	22.2644	2.74	25.0044				1619	442.469	256.3	698.769	52.7258
		1620	8.58771	-2.6	5.98771				1620	388.399	287.34	675.739	49.3005
		1621	23.5367	-6.32	17.2167				1621	380.924	271.34	652.264	49.8359
		1622	8.58771	14.9	23.4877				1622	389.194	208	597.194	53.8312
		1623	1.59032	13.14	14.7303				1623	390.466	126.38	516.846	60.3638
		1624	-4.77095	18.7	13.9291				1624	594.345	85.3	679.645	69.2513
		1625	16.6983	20.4	37.0983				1625	724.591	8.32	732.911	83.8838
		1626	24.968	-10.78	14.188				1626	767.371	17.86	785.231	81.3259
		1627	18.2886	3.12	21.4086				1627	828.28	19.46	847.74	81.2856
		1628	6.83836	9.52	16.3584				1628	854.838	29.62	884.458	79.4554
		1629	-1.74935	-11	-12.7493				1629	700.101	8.6	708.701	83.6756
		1630	14.949	-6.24	8.70898				1630	599.434	55.84	655.274	73.0272
		1631	-0.47709	15.98	15.5029				1631	842.593	46.04	888.633	76.8431
		1632	8.58771	19.8	28.3877				1632	983.654	28.76	1012.41	80.2968
		1633	28.3076	9.8	38.1076				1633	991.447	8.2	999.647	84.8036
		1634	10.178	7.42	17.598				1634	991.924	30.86	1022.78	79.9968
		1635	19.0838	4.9	23.9838				1635	949.303	27.46	976.763	80.3476
		1636	30.8521	7.92	38.7721				1636	898.095	8.82	906.915	84.3405
		1637	2.54451	-11.7	-9.15549				1637	863.903	35.42	899.323	78.5533
		1638	6.67933	3.5	10.1793				1638	557.926	110.06	667.986	66.0518
		1639	3.4987	1.42	4.9187				1639	736.201	9.74	745.941	83.4386
		1640	20.8331	10.76	31.5932				1640	752.422	30.92	783.342	78.5405
		1641	6.83836	-1.66	5.17836				1641	720.298	1.96	722.258	87.0139
		1642	6.67933	-1.34	5.33933				1642	754.648	3.84	758.488	85.9198
		1643	-0.63613	2.86	2.22387				1643	688.968	10.38	699.348	83.0023
		1644	5.24804	-4.14	1.10804				1644	680.063	17.1	697.163	80.9896
		1645	-7.95158	-5.9	-13.8516				1645	705.349	20.96	726.309	80.2193
		1646	0.79516	-8.42	-7.62484				1646	699.942	15.44	715.382	81.552
		1647	10.178	-5.24	4.93803				1647	681.653	1.64	683.293	87.1919
		1648	0.15903	12.28	12.439				1648	699.942	24.96	724.902	79.3063
		1649	-6.83836	-7.64	-14.4784				1649	480.001	11.7	491.701	81.1263
		1650	10.019	8.12	18.139				1650	41.0734	13.86	54.9334	59.8477
		1651	10.3371	-8.76	1.57706				1651	431.814	3.5	435.314	84.8555
		1652	9.0648	12.46	21.5248				1652	726.341	11.04	737.381	82.9717
		1653	9.22384	22.34	31.5638				1653	639.35	13.68	653.03	81.678
		1654	20.038	14.98	35.018				1654	632.512	3.56	636.072	85.7096
		1655	3.33966	-12.1	-8.76034				1655	697.715	25.1	722.815	79.2603
		1656	4.13482	15.88	20.0148				1656	692.149	19.3	711.449	80.5199
		1657	10.4961	-3.2	7.29609				1657	656.844	2.2	659.044	86.6878
		1658	7.63352	11.78	19.4135				1658	636.647	15.4	652.047	81.1597
		1659	-1.90838	3.02	1.11162				1659	655.89	8.2	664.09	83.6201
		1660	-4.13482	9.74	5.60518				1660	693.103	7.88	700.983	83.9138
		1661	13.9948	-2.3	11.6948				1661	674.815	8.64	683.455	83.5443
		1662	8.90577	-10.82	-1.91423				1662	755.762	21.46	777.222	80.435
		1663	9.22384	-1.06	8.16384				1663	708.37	29.88	738.25	78.3939
		1664	1.11322	-8.62	-7.50678				1664	749.718	14.54	764.258	82.0719
		1665	12.2454	14.96	27.2054				1665	729.999	4.08	734.079	85.7245
		1666	26.7173	0.62	27.3373				1666	591.8	17.92	609.72	80.1286
		1667	2.54451	5.72	8.26451				1667	753.853	6.72	760.573	84.6064
		1668	0.63613	1.14	1.77613				1668	707.575	15.36	722.935	81.6186
		1669	6.67933	-2.76	3.91933				1669	702.009	19.04	721.049	80.648
		1670	19.2428	1.3	20.5428				1670	750.037	10.32	760.356	83.3098
		1671	12.7225	-2.9	9.82253				1671	737.314	6.22	743.534	84.7522
		1672	12.7225	12.54	25.2625				1672	728.249	21.28	749.529	80.2996
		1673	22.7415	0.16	22.9015				1673	704.712	29.88	734.592	78.3647
		1674	20.038	1.8	21.838				1674	643.644	3.04	646.684	86.0685
		1675	-4.29385	2.26	-2.03385				1675	648.574	8.06	656.634	83.6391
		1676	17.3345	-4.32	13.0145				1676	746.061	13.5	759.561	82.3387
		1677	7.15642	5.24	12.3964				1677	760.055	7.5	767.555	84.3271
		1678	9.22384	6.5	15.7238				1678	740.972	11.14	752.112	83.0096
		1679	-3.33966	20.74	17.4003				1679	732.543	23.12	755.663	79.9262
		1680	1.59032	8.46	10.0503				1680	739.222	22.68	761.902	80.0649
		1681	13.6767	9.8	23.4767				1681	693.739	3.56	697.299	85.9026
		1682	0.31806	14.64	14.9581				1682	677.2	2.1	679.3	86.8127
		1683	5.40708	-7.02	-1.61292				1683	653.504	14.74	668.244	81.4589
		1684	-8.90577	1.64	-7.26577				1684	785.023	21.5	806.523	80.6032
		1685	21.9464	13.8	35.7464				1685	724.75	3.94	728.69	85.7831
		1686	14.3128	-3.12	11.1928				1686	696.92	19.64	716.56	80.4705
		1687	-4.29385	-6.34	-10.6339				1687	605.795	5.94	611.735	84.3449
		1688	9.85996	-9.38	0.47996				1688	423.704	6.9	430.604	82.7276
		1689	1.43128	0.86	2.29128				1689	783.115	6.44	789.555	84.8184
		1690	9.85996	9.26	19.12				1690	568.422	5.88	574.302	84.1926
		1691	3.33966	-6.32	-2.98034				1691	425.93	9.32	435.25	81.5856
		1692	4.77095	5.66	10.4309				1692	801.404	7.94	809.344	84.3157
		1693	8.74674	-3.54	5.20674				1693	625.515	10.62	636.135	82.5762
		1694	-0.95419	-12.88	-13.8342				1694	278.031	9.2	287.231	79.6903
		1695	5.40708	5.14	10.5471				1695	769.915	21.4	791.315	80.5348
		1696	0.15903	-13.34	-13.181				1696	742.88	7.46	750.34	84.2775
		1697	1.59032	-0.52	1.07032				1697	684.038	7.12	691.158	84.1746
		1698	19.0838	-2.52	16.5638				1698	734.292	25.7	759.992	79.4035
		1699	14.6309	-6.06	8.57091				1699	849.749	19.54	869.289	81.3773
		1700	19.5609	2.16	21.7209				1700	363.59	18.94	382.53	77.1433
		1701	4.61192	4.46	9.07192				1701	326.217	7	333.217	81.6663
		1702	5.72514	3.18	8.90514				1702	330.511	1.14	331.651	86.6389
		1703	-4.92998	20	15.07				1703	980.95	0.48	981.43	88.7328
		1704	11.6093	-4.66	6.94931				1704	870.742	20	890.742	81.3821
		1705	20.6741	3.82	24.4941				1705	828.916	9.8	838.716	83.7945
		1706	14.1538	8.2	22.3538				1706	849.908	18.3	868.208	81.6522
		1707	13.1996	-4.32	8.87963				1707	893.96	10	903.96	83.9626
		1708	-5.24804	14.72	9.47196				1708	584.326	4.18	588.506	85.1655
		1709	-3.97579	9.58	5.60421				1709	855.634	8.84	864.474	84.1962
		1710	-4.77095	1.86	-2.91095				1710	846.251	8.86	855.111	84.1577
		1711	3.0216	-8.44	-5.4184				1711	875.831	4.22	880.051	86.0293
		1712	8.11061	-8.62	-0.50939				1712	888.871	9.76	898.631	84.018
		1713	-0.31806	-11.8	-12.1181				1713	919.564	1.5	921.064	87.6872
		1714	16.0622	-6.86	9.2022				1714	917.815	3.56	921.375	86.4362
		1715	12.5635	13.64	26.2035				1715	849.908	13.28	863.188	82.8749
		1716	-9.0648	-1.18	-10.2448				1716	798.223	5.66	803.883	85.1867
		1717	13.8358	-1.62	12.2157				1717	734.928	18.48	753.408	80.9895
		1718	32.6015	-3.52	29.0815				1718	756.716	4.98	761.696	85.3621
		1719	-1.74935	-5.94	-7.68935				1719	774.686	14.42	789.106	82.2309
		1720	10.019	14.12	24.139				1720	757.511	9.68	767.191	83.5505
		1721	23.8547	-16.02	7.83475				1721	723.637	8.26	731.897	83.9017
		1722	6.99739	-0.3	6.69739				1722	661.615	11.04	672.655	82.6395
		1723	-1.11322	7.42	6.30678				1723	611.361	8	619.361	83.4742
		1724	3.33966	-8.84	-5.50034				1724	210.601	8.94	219.541	78.358
		1725	-12.5635	-4.36	-16.9235				1725	180.226	17.46	197.686	72.7111
		1726	-7.15642	-1.02	-8.17642				1726	439.925	1.42	441.345	86.7483
		1727	1.43128	-13.46	-12.0287				1727	740.336	10.96	751.296	83.0628
		1728	18.1296	-5.08	13.0496				1728	784.069	10.74	794.809	83.3246
		1729	-8.58771	3.02	-5.56771				1729	518.009	6.14	524.149	83.7866
		1730	18.1296	-10.96	7.16961				1730	191.04	6.02	197.06	79.934
		1731	7.15642	9.06	16.2164				1731	182.293	3.62	185.913	81.9788
		1732	16.5393	-0.9	15.6393				1732	203.922	15.66	219.582	74.511
		1733	3.97579	1.7	5.67579				1733	240.817	3.9	244.717	82.7476
		1734	5.24804	-3.4	1.84804				1734	155.894	4.44	160.334	80.4209
		1735	-0.15903	-7.32	-7.47903				1735	303.317	5.38	308.697	82.4139
		1736	9.38287	0.36	9.74287				1736	533.753	35.6	569.353	75.5193
		1737	9.85996	-9.82	0.03996				1737	596.73	8.4	605.13	83.2338
		1738	8.74674	-11.34	-2.59326				1738	752.74	23.78	776.52	79.9215
		1739	6.67933	7.54	14.2193				1739	763.872	30.9	794.772	78.628
		1740	10.9732	-1.46	9.51318				1740	692.626	29.1	721.726	78.4163
		1741	2.54451	13.56	16.1045				1741	659.388	21.04	680.428	79.8721
		1742	11.1322	5.9	17.0322				1742	664.477	14.18	678.657	81.6889
		1743	3.4987	7.52	11.0187				1743	775.482	12.12	787.602	82.8741
		1744	7.63352	-13.46	-5.82648				1744	720.457	1.76	722.217	87.1704
		1745	17.1754	7.92	25.0954				1745	446.127	5.58	451.707	83.6187
		1746	4.61192	2.16	6.77192				1746	275.486	5.46	280.946	81.9865
		1747	6.5203	-1.46	5.0603				1747	708.688	9.56	718.248	83.3751
		1748	-2.54451	22.12	19.5755				1748	694.853	21.72	716.573	79.9737
		1749	7.31546	2.04	9.35546				1749	621.539	20.8	642.339	79.6332
		1750	8.11061	11.3	19.4106				1750	383.15	0.72	383.87	87.5178
		1751	10.9732	14.34	25.3132				1751	660.343	2.1	662.443	86.7723
		1752	15.7441	-0.26	15.4841				1752	631.399	1.38	632.779	87.3233
		1753	5.88417	0.04	5.92417				1753	572.875	11.12	583.995	82.0684
		1754	33.7147	13.12	46.8347				1754	675.451	13.16	688.611	82.0538
		1755	3.97579	-2.58	1.39579				1755	612.156	29.42	641.576	77.6349
		1756	-0.95419	10.44	9.48581				1756	718.389	4.8	723.189	85.327
		1757	-6.99739	-11.16	-18.1574				1757	652.232	23.56	675.792	79.2388
		1758	31.0112	-1.78	29.2312				1758	663.682	29.08	692.762	78.1774
		1759	6.5203	-6.28	0.2403				1759	633.943	37.12	671.063	76.3971
		1760	15.108	-9.78	5.32801				1760	527.869	10.82	538.689	81.8524
		1761	7.47449	13.56	21.0345				1761	670.68	8.44	679.12	83.5994
		1762	-2.06741	5.4	3.33259				1762	649.369	22.6	671.969	79.4326
		1763	4.13482	3.24	7.37482				1763	628.536	18.52	647.056	80.2598
		1764	0.95419	1.44	2.39419				1764	707.893	6.7	714.593	84.4434
		1765	21.7873	1.82	23.6073				1765	665.591	22.74	688.331	79.5277
		1766	10.3371	-13.12	-2.78294				1766	660.979	33.28	694.259	77.353
		1767	19.2428	-4.48	14.7628				1767	26.1244	3.92	30.0444	68.8254
		1768	21.7873	-10.06	11.7273				1768	651.278	22.86	674.138	79.3886
		1769	-0.31806	17.84	17.5219				1769	640.623	17.9	658.523	80.5103
		1770	18.7657	14.44	33.2057				1770	161.778	8.46	170.238	77.1192
		1771	6.20223	2.1	8.30223				1771	433.404	7.64	441.044	82.4371
		1772	7.47449	10.28	17.7545				1772	633.625	9.84	643.465	82.8965
		1773	11.2912	18.5	29.7913				1773	539.638	24.6	564.238	77.9478
		1774	5.72514	8.32	14.0451				1774	582.417	12.28	594.697	81.7381
		1775	-0.63613	0.32	-0.31613				1775	679.745	0.64	680.385	88.2425
		1776	7.15642	-0.58	6.57642				1776	650.165	16.22	666.385	81.0244
		1777	7.95158	13.28	21.2316				1777	436.267	3.3	439.567	85.0294
		1778	27.8305	18.26	46.0905				1778	433.245	7.14	440.385	82.6846
		1779	3.18063	-6.92	-3.73937				1779	617.086	26.54	643.626	78.2838
		1780	15.4261	0.24	15.6661				1780	663.682	7.54	671.222	83.916
		1781	15.267	7.5	22.767				1781	498.766	3.9	502.666	84.9467
		1782	11.9274	14.92	26.8474				1782	458.213	18.42	476.633	78.6626
		1783	17.6525	-0.26	17.3925				1783	356.751	1.82	358.571	85.9146
		1784	24.3318	-3.5	20.8318				1784	681.971	15.66	697.631	81.3832
		1785	9.70093	-1.88	7.82093				1785	610.884	1.74	612.624	86.945
		1786	-0.15903	2.84	2.68097				1786	546.317	22.06	568.377	78.6379
		1787	6.0432	-6.14	-0.0968				1787	436.108	8.42	444.528	82.0894
		1788	7.47449	6.6	14.0745				1788	281.529	0.98	282.509	86.6235
		1789	28.9438	-12.74	16.2038				1789	310.473	8.1	318.573	80.8247
		1790	9.85996	12	21.86				1790	396.032	5.76	401.792	83.1234
		1791	-4.13482	0.04	-4.09482				1791	440.72	7.84	448.56	82.403
		1792	-6.99739	1.54	-5.45739				1792	464.098	2.5	466.598	85.8023
		1793	-7.63352	9.16	1.52648				1793	453.761	18.32	472.081	78.6387
		1794	-3.33966	1.12	-2.21966				1794	404.461	2.56	407.021	85.4513
		1795	15.267	5.16	20.427				1795	419.41	8.08	427.49	82.0979
		1796	2.70354	4.18	6.88354				1796	569.536	9.52	579.056	82.6332
		1797	10.019	-5.38	4.63899				1797	611.202	12.78	623.982	81.772
		1798	4.13482	3.7	7.83482				1798	605	8.6	613.6	83.2009
		1799	10.6551	-7.16	3.49512				1799	574.625	16.4	591.025	80.4111
		1800	4.29385	3.72	8.01385				1800	633.307	8.82	642.127	83.2695
		1801	2.22644	-1.46	0.76644				1801	471.572	20.64	492.212	78.1836
		1802	6.0432	-4.4	1.6432				1802	341.484	5.54	347.024	82.7413
		1803	-1.74935	15.46	13.7106				1803	364.067	2.78	366.847	85.0059
		1804	10.6551	-9.52	1.13512				1804	385.536	3.46	388.996	84.5883
		1805	3.81676	1.6	5.41676				1805	562.22	19.58	581.8	79.4292
		1806	0.95419	9.36	10.3142				1806	313.177	9.02	322.197	80.3681
		1807	10.019	-10.68	-0.66101				1807	352.775	7.22	359.995	81.8585
		1808	4.29385	1.36	5.65385				1808	46.7985	18.18	64.9785	58.0657
		1809	3.0216	8.68	11.7016				1809	202.172	6.14	208.312	80.1143
		1810	4.61192	5.52	10.1319				1810	693.262	8.64	701.902	83.63
		1811	12.4045	1.36	13.7645				1811	642.054	41	683.054	75.8182
		1812	1.27225	7.66	8.93225				1812	701.373	24.82	726.193	79.3462
		1813	10.3371	25.76	36.0971				1813	400.962	0.38	401.342	88.2367
		1814	7.31546	-1.52	5.79546				1814	320.969	12.7	333.669	78.7498
		1815	12.4045	-5.56	6.84447				1815	404.143	13.64	417.783	79.5901
		1816	13.8358	-6.56	7.27575				1816	213.623	18.54	232.163	73.5851
		1817	17.1754	-2.84	14.3354				1817	570.49	18.26	588.75	79.8567
		1818	11.1322	7.54	18.6722				1818	407.959	2.82	410.779	85.2473
		1819	1.90838	11.28	13.1884				1819	263.877	3.56	267.437	83.3747
		1820	3.4987	-6.74	-3.2413				1820	650.96	7.68	658.64	83.8009
		1821	-0.47709	-0.74	-1.21709				1821	300.295	8.48	308.775	80.4609
		1822	8.90577	14.3	23.2058				1822	679.108	5.94	685.048	84.657
		1823	4.13482	-9.04	-4.90518				1823	403.347	3.82	407.167	84.4416
		1824	4.77095	4.68	9.45095				1824	758.306	3.32	761.626	86.2144
		1825	11.4503	2.7	14.1503				1825	703.44	1	704.44	87.8407
		1826	25.127	-4.7	20.427				1826	622.016	0.96	622.976	87.7502
		1827	12.0864	6.46	18.5464				1827	684.038	7.74	691.778	83.9281
		1828	16.8574	-4.54	12.3174				1828	567.15	14.36	581.51	80.9588
		1829	6.67933	18.44	25.1193				1829	314.767	1.06	315.827	86.6788
		1830	12.5635	-2.18	10.3835				1830	553.314	31.32	584.634	76.6172
		1831	14.3128	9.82	24.1329				1831	264.831	4.86	269.691	82.2853
		1832	-3.33966	6.48	3.14034				1832	197.242	4.48	201.722	81.4295
		1833	2.70354	3.68	6.38354				1833	388.239	6.56	394.799	82.5938
		1834	5.08901	17.86	22.949				1834	413.048	8.72	421.768	81.7329
		1835	6.20223	6.6	12.8022				1835	277.872	1.64	279.512	85.6069
		1836	10.4961	-3.28	7.21609				1836	519.441	24.1	543.541	77.8444
		1837	20.356	-10.62	9.73605				1837	250.359	15.66	266.019	75.9583
		1838	9.70093	13.74	23.4409				1838	613.587	8	621.587	83.4859
		1839	10.9732	9.14	20.1132				1839	50.7743	14.08	64.8543	62.2288
		1840	20.038	33.08	53.118				1840	695.171	9.8	704.971	83.2289
		1841	-1.43128	-9.88	-11.3113				1841	649.369	19.76	669.129	80.1049
		1842	-6.67933	-1.42	-8.09933				1842	417.66	7.82	425.48	82.2084
		1843	-1.27225	-7.4	-8.67225				1843	380.924	3.52	384.444	84.5091
		1844	7.95158	1.98	9.93158
		1845	1.59032	-18.4	-16.8097
		1846	19.0838	-2.2	16.8838
		1847	13.0406	-16.12	-3.0794
		1848	-4.92998	6.08	1.15002
		1849	10.9732	-1.2	9.77318
		1850	7.63352	17.48	25.1135
		1851	11.6093	-7.32	4.28931
		1852	8.90577	4.24	13.1458
		1853	23.3776	-13.46	9.91765
		1854	11.9274	-12.68	-0.75263
		1855	-5.56611	5.16	-0.40611
		1856	8.42868	0.42	8.84868
		1857	4.45289	4.1	8.55289
		1858	23.0596	10.4	33.4596
		1859	10.9732	1.16	12.1332
		1860	18.9248	8.86	27.7848
		1861	9.22384	2.46	11.6838
		1862	-0.63613	-5.16	-5.79613
		1863	7.63352	-7.5	0.13352
		1864	0.31806	2.74	3.05806
		1865	19.4019	9.74	29.1419
		1866	12.4045	17.8	30.2045
		1867	3.65773	19.98	23.6377
		1868	10.4961	14.56	25.0561
		1869	-10.6551	-0.54	-11.1951
		1870	13.0406	5.06	18.1006
		1871	18.9248	5.94	24.8648
		1872	-10.019	8.88	-1.13899
		1873	11.2912	-1.6	9.69125
		1874	-4.13482	15.14	11.0052
		1875	14.7899	13.38	28.1699
		1876	18.7657	-1.24	17.5257
		1877	12.4045	6.64	19.0445
		1878	-2.38547	-6.68	-9.06547
		1879	2.22644	-0.34	1.88644
		1880	-13.0406	-2.88	-15.9206
		1881	24.6499	-2.82	21.8299
		1882	-3.81676	8	4.18324
		1883	-4.77095	-2.36	-7.13095
		1884	3.4987	15.5	18.9987
		1885	4.77095	-9.44	-4.66905
		1886	-5.88417	-7.5	-13.3842
		1887	27.8305	10.56	38.3905
		1888	-13.0406	-4.24	-17.2806
		1889	-7.95158	6.42	-1.53158
		1890	-2.38547	-11.24	-13.6255
		1891	15.267	10.38	25.647
		1892	2.54451	0.6	3.14451
		1893	7.15642	12.46	19.6164
		1894	-0.15903	14.38	14.221
		1895	24.0138	4.26	28.2738
		1896	1.74935	-12.44	-10.6906
		1897	-10.4961	-2.38	-12.8761
		1898	13.8358	-10.32	3.51575
		1899	16.0622	-5.44	10.6222
		1900	0	4.96	4.96
		1901	23.3776	8.96	32.3376
		1902	13.1996	-9.66	3.53963
		1903	1.74935	3.8	5.54935
		1904	7.31546	2.56	9.87546
		1905	3.18063	13.8	16.9806
		1906	7.63352	-2.94	4.69352
		1907	5.08901	-1.1	3.98901
		1908	-0.79516	21.1	20.3048
		1909	-4.92998	-2.2	-7.12998
		1910	-1.74935	9.52	7.77065
		1911	3.97579	-11.94	-7.96421
		1912	4.77095	-20.28	-15.5091
		1913	6.67933	4.36	11.0393
		1914	1.59032	-13.96	-12.3697
		1915	1.27225	3	4.27225
		1916	3.4987	20.06	23.5587
		1917	9.70093	10.76	20.4609
		1918	1.74935	-7.2	-5.45065
		1919	-3.4987	0.34	-3.1587
		1920	7.63352	1.12	8.75352
		1921	23.3776	11.32	34.6977
		1922	4.13482	-9.92	-5.78518
		1923	-3.18063	-22.3	-25.4806
		1924	7.79255	7.04	14.8325
		1925	11.2912	-5.3	5.99125
		1926	15.108	2.5	17.608
		1927	19.2428	1.16	20.4028
		1928	-5.88417	9.92	4.03583
		1929	11.1322	5.54	16.6722
		1930	-4.92998	6.06	1.13002
		1931	4.92998	-13.04	-8.11002
		1932	4.92998	7.78	12.71
		1933	19.879	1.1	20.979
		1934	3.65773	-3.86	-0.20227
		1935	3.18063	-5.88	-2.69937
		1936	6.36127	-3.06	3.30127
		1937	-2.06741	-6.18	-8.24741
		1938	-2.86257	5.5	2.63743
		1939	6.99739	16.46	23.4574
		1940	-3.81676	-15.58	-19.3968
		1941	2.22644	2.08	4.30644
		1942	-0.47709	15.86	15.3829
		1943	-3.18063	-1.92	-5.10063
		1944	-12.8816	4.44	-8.44156
		1945	-10.6551	17.56	6.90488
		1946	0.63613	9.68	10.3161
		1947	-5.88417	-4.82	-10.7042
		1948	17.4935	-1.28	16.2135
		1949	6.5203	-0.68	5.8403
		1950	5.24804	0.94	6.18804
		1951	0.95419	12.36	13.3142
		1952	-6.67933	19.96	13.2807
		1953	5.08901	10.14	15.229
		1954	8.58771	2.98	11.5677
		1955	0.47709	13.44	13.9171
		1956	-9.22384	5.7	-3.52384
		1957	5.08901	-2.34	2.74901
		1958	8.74674	-4.46	4.28674
		1959	9.0648	-3.64	5.4248
		1960	4.13482	14.56	18.6948
		1961	-1.43128	6.88	5.44872
		1962	6.5203	-5.36	1.1603
		1963	5.40708	8.72	14.1271
		1964	2.86257	-13.92	-11.0574
		1965	-5.08901	-5.72	-10.809
		1966	-2.86257	-8.28	-11.1426
		1967	-8.74674	-1.82	-10.5667
		1968	-0.95419	5.82	4.86581
		1969	7.15642	0.46	7.61642
		1970	-8.11061	5.94	-2.17061
		1971	1.4372e-15	8.88	8.88
		1972	-1.74935	18.8	17.0507
		1973	8.26965	-14.96	-6.69035
		1974	5.08901	-12.88	-7.79099
		1975	-4.45289	-0.4	-4.85289
		1976	1.11322	-7.68	-6.56678
		1977	13.6767	6.94	20.6167
		1978	7.47449	11.4	18.8745
		1979	4.13482	16.66	20.7948
		1980	1.59032	-4.6	-3.00968
		1981	3.97579	5	8.97579
		1982	-0.95419	0.86	-0.09419
		1983	18.7657	-8.1	10.6657
		1984	18.2886	-5.36	12.9286
		1985	7.95158	-21.66	-13.7084
		1986	18.9248	8.46	27.3848
		1987	14.949	-6.9	8.04898
		1988	24.4909	-17.34	7.15088
		1989	19.5609	4.06	23.6209
		1990	-5.40708	-12.88	-18.2871
		1991	11.1322	21.66	32.7922
		1992	14.6309	-4.82	9.81091
		1993	9.5419	-1.74	7.8019
		1994	15.7441	-12.08	3.66413
		1995	0.15903	7.92	8.07903
		1996	14.3128	17.28	31.5928
		1997	-4.92998	6.18	1.25002
		1998	20.6741	5	25.6741
[truncated: 48,002 more rows]
