# Supplementary material for: Deciphering a hexameric protein complex with Angstrom optical resolution
Source: eLife journal article supplement (doi:10.7554/elife.76308), 2022-05-13
Supplement: fig2-data1 [file Figure 2-source data 1.xlsx]

## Sheet: Figure 2a_1
				Raw localized coordinates of each flourophore (nm)							X: is the x corrdinates		Y : is the y coordinates			dX and dY are the localization prescision in X and Y respectively	Numbers 1, 2 ,3 indicate each flurophore on single proteins
	Molecule #	X1	Y1	dX1	dY1	<dX1,dY1>	X2	Y2	dX2	dY2	<dX2,dY2>	X3	Y3	dX3	dY3	<dX3,dY3>
	1	21.5181	-7.25673	0.706536	0.809206	0.757871	25.0093	1.78604	2.07942	2.15143	2.11542	24.4986	-0.0784659	1.60126	1.75396	1.67761
	2	-11.8302	-23.8819	0.987024	1.41129	1.19916	-18.9271	-29.4733	0.532018	0.79423	0.663124	-19.3601	-30.5021	1.21251	1.9613	1.5869
	3	3.63137	7.55543	0.799394	0.7038	0.751597	-2.08075	0.963617	0.979596	0.975773	0.977685	0.415664	-1.6699	0.912141	0.889105	0.900623
	4	-6.8072	5.07515	1.9859	1.89646	1.94118	0.0799793	4.87035	0.898379	0.988101	0.94324	-0.225868	-1.49269	0.971085	0.993291	0.982188
	5	2.61073	0.598529	0.669768	0.745672	0.70772	0.862234	1.15566	0.76289	0.74008	0.751485	-5.22833	-0.177059	1.24693	1.12634	1.18664
	6	-1.3345	9.18424	1.00746	1.04589	1.02668	-0.309999	8.4195	0.66944	0.742491	0.705965	0.144408	-1.54728	1.20817	1.22754	1.21786
	7	-0.65545	3.86548	0.641019	0.700619	0.670819	1.53146	0.180879	0.323028	0.338876	0.330952	-0.0652558	-5.50588	0.705609	1.26577	0.985687
	8	-6.34885	-4.76641	0.961605	1.18501	1.07331	-2.75952	-3.51161	0.638202	0.6654	0.651801	1.58089	2.22874	0.393404	0.425117	0.409261
	9	2.21553	5.82076	1.10416	1.1238	1.11398	2.96792	-4.31807	1.42152	1.34792	1.38472	-0.0319725	1.72494	1.1621	1.18807	1.17508
	10	-5.37212	30.0481	0.58171	0.738853	0.660281	1.6523	30.546	0.617935	0.748275	0.683105	5.30751	32.0535	1.18045	1.44218	1.31131
	11	-20.7259	13.5226	0.608887	0.649022	0.628954	-12.8692	13.481	0.588511	0.638145	0.613328	-12.2997	13.6567	0.580377	0.677532	0.628955
	12	-5.11684	2.13819	1.34244	1.37226	1.35735	-7.11723	1.32453	1.0674	1.06288	1.06514	-6.92218	-7.15707	0.562324	0.536205	0.549264
	13	12.2935	-6.08215	0.358849	0.309205	0.334027	11.851	-5.6443	0.991846	1.10908	1.05046	3.69143	-0.968696	0.727573	0.781328	0.75445
	14	7.55874	-3.37589	1.13565	1.1969	1.16628	-1.45055	-0.974685	0.364899	0.381667	0.373283	0.10748	-6.26063	0.872075	0.915162	0.893618
	15	-0.459787	1.53694	0.460232	0.480847	0.470539	2.3465	-1.77954	1.1107	1.14518	1.12794	-3.84334	5.80881	1.27155	1.42313	1.34734
	16	-2.79829	-3.13536	0.856136	0.971122	0.913629	0.705685	3.60724	1.22215	1.25799	1.24007	-0.10897	3.99932	1.17924	1.61873	1.39899
	17	-15.8835	2.42891	0.505274	0.471804	0.488539	-8.71303	4.77235	1.30642	1.04473	1.17558	-8.59513	7.79781	0.63768	0.534859	0.58627
	18	2.51632	-4.41929	0.382427	0.374332	0.37838	-1.61922	-1.4695	0.266805	0.284789	0.275797	-2.38759	0.469291	0.835102	1.09489	0.964994
	19	-4.08693	49.8892	0.514556	0.664563	0.58956	-3.20847	50.8811	0.462768	0.472133	0.467451	-2.3782	42.6207	0.269511	0.370804	0.320158
	20	2.62523	-2.10435	0.83741	0.832483	0.834947	-0.366728	3.07581	0.754835	0.946457	0.850646	1.46186	7.23986	1.08328	1.00853	1.0459
	21	-0.500618	-1.71474	0.818114	1.6547	1.2364	0.790355	-1.53429	0.665447	0.879175	0.772311	-6.54318	-4.64493	0.739953	0.748036	0.743994
	22	1.86626	-0.559169	0.47312	0.493685	0.483403	-4.55255	5.16472	0.575353	0.530139	0.552746	-2.39891	5.0703	0.66182	0.589892	0.625856
	23	-0.0972072	8.17799	0.553365	0.547737	0.550551	-2.29155	-0.494882	1.10742	1.11379	1.11061	1.17094	-0.0917138	0.564635	0.584987	0.574811
	24	15.255	4.67399	1.13867	1.07049	1.10458	14.6044	3.32806	0.314166	0.319882	0.317024	15.0619	-2.29251	0.53775	0.636504	0.587127
	25	-3.03383	-17.9037	0.913605	0.935481	0.924543	-0.694234	-9.4025	0.278244	0.316935	0.29759	-0.19803	-8.39793	0.740037	0.836386	0.788212
	26	-7.26562	-4.23757	0.755133	0.790751	0.772942	-7.70451	-0.600804	0.747434	0.863801	0.805618	-16.589	-3.83859	1.18379	1.13273	1.15826
	27	1.24839	-0.941799	1.17356	1.14442	1.15899	-2.79551	-5.43765	1.10619	1.12801	1.1171	1.83312	4.69059	0.872853	0.886503	0.879678
	28	-0.123023	-6.22873	1.08724	1.16461	1.12593	0.339137	-4.59913	0.455603	0.518405	0.487004	0.334743	0.76277	0.211755	0.230934	0.221344
	29	33.208	-16.8369	0.792572	0.840686	0.816629	29.6808	-18.3715	1.11104	1.1611	1.13607	31.6303	-25.9408	0.48735	0.365838	0.426594
	30	-4.02412	-3.96681	0.856362	0.901801	0.879082	2.39518	4.36366	0.917054	1.01537	0.96621	3.61435	3.63552	0.842876	0.793218	0.818047
	31	4.05784	3.72701	1.55025	1.60677	1.57851	0.994878	-0.225051	0.619489	0.691712	0.6556	-5.65565	-0.231729	0.87536	1.01155	0.943453
	32	4.25382	-0.317842	0.499915	0.488894	0.494404	-2.65646	-8.669	0.861441	0.956282	0.908861	-4.49559	-0.969399	0.853075	1.02631	0.939691
	33	5.05914	2.27255	0.775748	0.774566	0.775157	-0.812646	-0.766132	0.556663	0.573686	0.565174	-3.61472	-0.449213	1.57297	1.6352	1.60408
	34	13.3278	-0.695847	1.24944	1.32394	1.28669	9.93517	1.48165	1.17202	1.16529	1.16866	6.05448	4.5054	1.4279	1.48412	1.45601
	35	0.244835	4.9785	1.00105	1.1239	1.06248	1.87181	-5.59895	1.07459	1.28858	1.18159	-0.675792	0.321585	1.36315	1.44593	1.40454
	36	-14.2252	5.59984	1.86673	1.60765	1.73719	-7.9058	0.498462	1.06519	0.901662	0.983427	-10.3312	0.357796	0.996518	0.877994	0.937256
	37	-0.775928	-0.862944	0.393388	0.437869	0.415628	0.803188	-1.09457	0.940585	1.01177	0.976176	1.91158	8.46579	1.43134	1.61154	1.52144
	38	4.18234	3.27821	0.904804	1.02938	0.967092	-1.25276	-5.04284	0.555877	0.601105	0.578491	-1.48293	0.341408	0.836378	0.884976	0.860677
	39	0.423825	3.75721	0.87372	1.03693	0.955324	1.57684	3.1975	0.404071	0.437415	0.420743	-2.52137	-3.1414	0.296877	0.307311	0.302094
	40	14.4523	14.6063	1.0648	0.924275	0.994536	16.3289	6.50542	1.48916	1.24258	1.36587	6.61475	5.60903	1.25591	1.17719	1.21655
	41	6.39253	2.96721	1.78442	1.91319	1.84881	3.17457	5.57293	0.670733	0.800499	0.735616	6.66717	12.4389	1.57722	1.80156	1.68939
	42	1.29514	-3.08355	0.938831	0.963925	0.951378	1.34069	-2.97802	0.80117	0.730546	0.765858	-3.21778	2.09556	0.646984	0.635299	0.641142
	43	-4.71795	4.61892	1.05198	1.02089	1.03643	-3.1821	3.34005	0.605402	0.627301	0.616351	1.23104	-2.77076	0.726966	0.729504	0.728235
	44	-2.06016	4.55984	0.501447	0.633854	0.567651	-0.0103569	-6.59959	0.943501	1.06362	1.00356	0.686912	-1.37327	0.889211	1.30624	1.09772
	45	4.04318	25.7125	0.823792	1.06243	0.94311	6.67318	33.0766	0.679922	0.87435	0.777136	5.09673	35.1578	0.481281	0.588709	0.534995
	46	23.3309	-13.7202	1.4825	1.67942	1.58096	23.4865	-16.9105	1.77109	2.02666	1.89888	16.4811	-11.2416	0.685466	0.729477	0.707472
	47	-2.51854	-4.02847	0.836897	0.903363	0.87013	-4.37419	-11.1785	1.1126	1.1748	1.1437	-1.10055	-5.51325	0.992825	1.03976	1.01629
	48	-2.07547	1.82638	0.744669	0.789004	0.766836	7.13595	-1.06003	0.592413	0.63727	0.614842	1.97195	2.6625	0.677869	0.910709	0.794289
	49	-60.5928	1.95244	0.737102	0.785519	0.76131	-51.3006	-1.3652	0.590042	0.632515	0.611278	-56.5608	2.97768	0.680305	0.913792	0.797049
	50	5.5035	-1.99148	0.686388	0.687684	0.687036	2.53728	2.20055	1.15881	1.23294	1.19588	1.96005	7.17627	1.45129	1.26732	1.3593
	51	3.72342	-3.80497	0.609139	0.6276	0.618369	1.98614	5.22821	0.97478	1.05582	1.0153	2.59983	-0.740919	0.850359	0.907341	0.87885
	52	-2.22086	6.18047	0.786279	0.779677	0.782978	0.16538	-2.42082	1.57814	1.41255	1.49534	1.72173	-2.67565	0.236663	0.247759	0.242211
	53	-0.0792016	-1.35163	0.865652	0.897056	0.881354	2.16634	4.54354	1.52292	1.47347	1.49819	5.58582	6.65853	0.332212	0.347649	0.339931
	54	-5.0798	-0.532215	0.77775	0.887132	0.832441	-3.50555	0.257507	0.831991	0.90343	0.86771	-3.74981	-7.64636	0.923319	1.01028	0.966799
	55	-3.79032	-0.56572	2.28841	2.47249	2.38045	-0.622875	-2.34287	1.12202	1.23554	1.17878	4.01328	2.01008	1.27065	1.49386	1.38225
	56	1.87626	2.26852	1.31339	1.30509	1.30924	2.88765	3.22033	0.648485	0.634184	0.641334	-3.09102	-2.07473	1.17675	1.28559	1.23117
	57	4.81974	2.43985	1.12251	1.44484	1.28368	5.0417	0.21535	0.759298	0.938686	0.848992	-3.99849	6.89393	0.890904	0.911699	0.901302
	58	0.41391	1.22299	1.22951	0.929889	1.0797	2.11722	0.18183	0.414847	0.344279	0.379563	5.53659	-5.81668	1.02982	1.03556	1.03269
	59	2.73509	-2.50664	0.888589	0.62495	0.756769	10.7038	2.25526	0.525799	0.451841	0.48882	11.4474	2.90557	1.13385	0.862834	0.998341
	60	0.704109	5.23694	0.732131	0.774956	0.753543	-2.95296	-2.96522	0.809876	0.780876	0.795376	-3.28924	-4.15374	1.29078	1.47016	1.38047
	61	0.643532	-2.16247	0.696341	0.719586	0.707963	0.0999847	-1.18439	0.547365	0.574484	0.560925	-6.34282	2.43409	1.16436	1.23385	1.19911
	62	-6.14554	4.8211	1.12254	1.11352	1.11803	0.978819	3.05152	0.786096	0.812671	0.799384	0.464505	-3.68092e-05	0.851738	0.850257	0.850997
	63	1.4424	-1.1988	1.44563	2.02607	1.73585	4.36594	-10.8698	1.28776	1.29918	1.29347	2.72208	-3.87295	0.882498	1.1068	0.994647
	64	-6.66243	3.63639	0.567932	0.597645	0.582789	-1.67126	-5.26198	0.699994	0.731512	0.715753	-1.22193	2.84884	0.939412	1.12374	1.03157
	65	-13.857	8.83606	1.08979	1.15821	1.124	-4.45113	3.23806	0.84026	0.96542	0.90284	-13.494	0.674937	1.40245	1.59968	1.50106
	66	-0.409761	-3.68922	0.534311	0.525999	0.530155	-0.398977	0.384277	0.609833	0.601685	0.605759	-5.22706	4.23272	1.28468	1.18373	1.2342
	67	4.87506	-8.30711	1.04443	0.955632	1.00003	-1.19582	1.16159	0.255294	0.249917	0.252605	0.47849	0.0187201	0.992529	1.01319	1.00286
	68	-13.4105	-7.88749	2.15806	2.14865	2.15335	-12.0564	-6.87914	0.903294	0.85056	0.876927	-4.24577	-4.61596	1.58525	1.5695	1.57738
	69	-2.83366	6.99166	0.594789	0.595597	0.595193	-1.5195	0.772124	0.606481	0.60677	0.606625	1.51675	-3.15109	0.755988	0.690495	0.723242
	70	-2.38554	8.36896	1.18979	1.57121	1.3805	1.45008	-1.14258	0.487883	0.522389	0.505136	-3.25304	-0.399923	0.809089	0.862157	0.835623
	71	-14.7465	21.7609	2.17375	2.5491	2.36142	-14.0633	22.1314	0.793565	0.847633	0.820599	-8.24095	17.1997	0.679886	0.735636	0.707761
	72	-3.52037	3.22329	0.815374	0.838979	0.827176	1.89853	7.00146	0.856667	0.931094	0.89388	1.63506	8.68026	0.653811	0.673587	0.663699
	73	6.16376	1.03586	0.832919	0.885759	0.859339	-0.686153	-1.13406	0.36302	0.386908	0.374964	-2.28345	1.43933	0.863411	0.925847	0.894629
	74	-2.2021	-6.84305	1.46206	1.65485	1.55846	0.248131	-7.60648	0.783847	0.810172	0.797009	8.58534	-3.88431	1.48254	1.66897	1.57575
	75	0.66437	-8.44133	0.957925	0.906777	0.932351	-0.879466	2.3316	0.589089	0.586486	0.587788	-0.712375	1.14058	1.2004	1.35939	1.27989
	76	0.288144	-5.29441	0.637496	0.663217	0.650357	-0.368903	2.67947	0.325061	0.38487	0.354965	1.70372	2.82083	0.869895	1.07082	0.970356
	77	4.74655	-5.04488	0.947806	1.15232	1.05006	-0.419511	2.94996	0.283056	0.33581	0.309433	2.81242	-5.90882	0.449382	0.529542	0.489462
	78	-3.78374	-2.42793	0.909591	0.867543	0.888567	5.09577	-6.43026	0.907683	0.917243	0.912463	-0.364432	-0.078045	0.310293	0.319779	0.315036
	79	-5.24461	-5.00255	1.04693	1.11568	1.08131	2.50504	-3.16294	1.72328	1.68144	1.70236	2.5403	0.838654	1.34879	1.43907	1.39393
	80	-3.17568	5.08256	0.818161	0.83017	0.824165	3.63615	1.00641	1.29851	1.30617	1.30234	2.12463	-2.3392	1.45981	1.51316	1.48649
	81	-0.764388	-7.72831	0.540007	0.6984	0.619204	-0.239097	-7.99503	1.13282	1.46803	1.30043	-3.51147	-16.9869	0.724614	0.902674	0.813644
	82	0.479438	4.79758	0.588392	0.49787	0.543131	9.66855	7.09054	0.379888	0.382022	0.380955	9.19393	6.4328	0.643579	0.598387	0.620983
	83	4.1613	-1.45911	1.20907	1.19312	1.2011	-0.404297	-2.22117	0.517322	0.500954	0.509138	-4.07507	-3.17149	1.37359	1.31957	1.34658
	84	-6.06334	5.00138	0.57636	0.60204	0.5892	-6.38797	3.54982	0.700277	0.729653	0.714965	0.319272	0.42948	0.276598	0.273824	0.275211
	85	-3.91728	48.0295	0.717972	0.697615	0.707793	-10.2081	46.5807	0.670598	0.820279	0.745438	-12.5985	45.1759	1.73463	2.43919	2.08691
	86	15.2031	-15.5138	0.555149	0.595194	0.575172	15.5623	-7.96237	0.944541	0.981288	0.962914	19.3805	-6.45321	1.11952	1.22003	1.16978
	87	12.0988	-22.6386	0.376731	0.366826	0.371779	6.94362	-17.8981	0.760594	0.657293	0.708943	6.59367	-16.7519	1.57978	1.64793	1.61385
	88	0.247751	6.79436	0.959228	1.08448	1.02185	2.29607	11.2005	0.923113	1.08358	1.00335	-3.89658	14.1094	1.55346	1.87124	1.71235
	89	3.54559	4.01475	1.25662	1.2492	1.25291	5.87784	2.97065	0.494975	0.534478	0.514726	-3.24902	-1.97743	0.468582	0.506048	0.487315
	90	10.1759	-5.81521	1.34688	1.37535	1.36112	5.77468	-3.55354	0.536169	0.654896	0.595532	3.3304	-10.8844	0.8602	0.851229	0.855714
	91	-1.09237	6.81728	1.27645	1.3558	1.31613	-0.30161	1.9688	0.770154	0.806844	0.788499	2.21446	-3.59619	0.995413	1.10031	1.04786
	92	0.810464	4.16337	0.952586	1.04992	1.00125	4.09462	8.94313	1.50117	1.67414	1.58765	-3.71575	10.6082	0.761405	0.857874	0.80964
	93	-1.82561	-2.21602	0.785224	0.82378	0.804502	3.78726	3.9226	1.28011	1.40212	1.34112	1.51795	4.49015	0.916608	0.917576	0.917092
	94	6.95132	4.49691	0.986938	0.950543	0.968741	7.92256	2.63596	1.13957	1.10285	1.12121	3.02967	-2.35214	1.19447	1.33022	1.26234
	95	-5.39077	-4.59652	0.894668	0.95004	0.922354	1.72551	-0.201832	0.413722	0.434229	0.423976	-0.183667	4.03837	0.606565	0.826824	0.716694
	96	-19.7396	5.4057	0.890722	0.76459	0.827656	-21.419	3.80282	1.43506	1.20034	1.3177	-15.858	-3.40044	1.32454	0.92146	1.123
	97	1.24878	-0.254135	0.544501	0.58726	0.56588	-4.55642	-3.25793	0.777756	0.869303	0.823529	-5.38106	-6.5272	1.47496	1.61668	1.54582
	98	7.95079	-13.5753	1.12621	0.9996	1.0629	1.74544	-8.2654	0.811435	0.9029	0.857168	3.01337	-4.8213	0.535723	0.595348	0.565535
	99	12.3313	-8.5209	0.698133	0.705859	0.701996	10.9393	-6.08907	1.10323	0.984651	1.04394	5.0123	-2.00508	0.613608	0.643776	0.628692
	100	93.6608	-69.4251	1.1991	1.18915	1.19413	93.5628	-71.8668	0.45073	0.464053	0.457392	94.6964	-76.473	0.163678	0.173241	0.16846
	101	0.233748	-2.03326	1.14012	0.832225	0.986171	-7.28011	5.12545	0.533653	0.51492	0.524286	-5.31999	0.811023	1.04418	1.07702	1.0606
	102	-5.40655	2.15372	0.849744	0.848163	0.848953	-1.46929	-1.3782	1.26075	1.30209	1.28142	-2.1852	-5.18766	0.904709	0.948158	0.926434
	103	-7.9227	7.82763	1.43018	1.35153	1.39085	-7.49128	6.59115	1.73423	1.52647	1.63035	-12.5064	-2.37871	1.32291	1.41691	1.36991
	104	1.06678	1.65326	1.26409	1.36858	1.31633	3.66289	0.194798	0.92138	0.989079	0.955229	-4.70253	-0.929473	1.73672	1.83789	1.78731
	105	17.7245	-33.1456	0.150928	0.176409	0.163668	19.1922	-32.9169	0.661236	0.873297	0.767267	24.0386	-25.6232	0.473971	0.649482	0.561727
	106	-1.48452	1.84136	1.48718	1.61432	1.55075	-0.146774	2.82104	0.896926	0.962191	0.929559	-5.9023	-5.8278	0.975899	0.98444	0.980169
	107	1.07284	9.41819	1.28645	1.54283	1.41464	3.50746	8.64597	0.596413	0.632395	0.614404	1.78368	1.32805	0.440581	0.443591	0.442086
	108	-0.470456	-6.41999	0.932462	1.13403	1.03324	-0.0570291	-3.66667	0.580447	0.683058	0.631752	-4.89881	-12.8878	0.824336	0.915199	0.869768
	109	6.87006	-11.8254	1.58716	1.63233	1.60974	9.13303	-6.49014	1.74329	1.96539	1.85434	10.7312	-3.20634	0.852829	0.944348	0.898588
	110	2.8508	6.6916	0.744925	0.743557	0.744241	1.37162	-4.29749	0.734593	0.727251	0.730922	-1.95196	2.12418	0.739209	0.804705	0.771957
	111	-12.0319	-18.1028	0.841116	0.960116	0.900616	-15.1968	-23.9079	0.799344	0.939431	0.869388	-16.1663	-24.9196	0.952267	1.18906	1.07066
	112	11.6749	3.14462	0.426751	0.432846	0.429799	10.2727	2.19786	1.43738	1.54345	1.49042	2.25718	0.0226332	1.35204	1.52092	1.43648
	113	-5.71846	-3.99953	0.676532	0.726629	0.701581	-1.3035	-3.3855	1.71236	1.91874	1.81555	1.82843	2.21673	1.30871	1.48267	1.39569
	114	-41.2676	6.18015	0.849578	0.757773	0.803676	-43.2004	6.10123	0.666071	0.610735	0.638403	-33.3102	4.21924	0.928954	0.651143	0.790048
	115	4.80234	4.56845	1.07511	1.06664	1.07088	0.608453	-0.671031	0.515422	0.601214	0.558318	-2.33774	-0.892614	1.35799	1.57068	1.46433
	116	26.7421	19.7852	0.642887	0.518751	0.580819	26.5832	16.1093	0.649266	0.553519	0.601393	24.204	10.386	0.858748	0.788247	0.823497
	117	9.91302	-26.2699	0.841518	0.878297	0.859907	9.48578	-19.4411	0.432148	0.4889	0.460524	7.45376	-16.5842	0.813562	0.929048	0.871305
	118	-5.423	-31.0063	0.52795	0.600566	0.564258	-2.76369	-38.2679	0.976984	1.0432	1.01009	-7.44292	-29.6415	1.28615	1.68264	1.48439
	119	-5.70016	11.3321	0.601335	0.705076	0.653206	-9.22832	5.99535	1.03821	1.23064	1.13442	-11.6024	14.3291	1.30781	1.72483	1.51632

## Sheet: Figure 2a_2
		Normalized center of mass coordinates (nm)
	Molecule #	X1	Y1	X2	Y2	X3	Y3	dX	dY
	1	-2.15719	-5.40701	1.33396	3.63576	0.823227	1.77125	1	1
	2	4.87562	4.07055	-2.2213	-1.52087	-2.65431	-2.54968	1	1
	3	2.97594	5.27238	-2.73618	-1.31943	-0.239766	-3.95295	1	1
	4	-4.4895	2.25755	2.39768	2.05275	2.09183	-4.31029	1	1
	5	3.19585	0.07282	1.44736	0.629949	-4.64321	-0.702769	1	1
	6	-0.834466	3.83209	0.190029	3.06735	0.644437	-6.89944	1	1
	7	-0.9257	4.35199	1.26121	0.667389	-0.335506	-5.01937	1	1
	8	-3.83969	-2.74998	-0.25036	-1.49519	4.09005	4.24517	1	1
	9	0.498372	4.74488	1.25076	-5.39394	-1.74913	0.649061	1	1
	10	-5.90135	-0.834458	1.12307	-0.336538	4.77828	1.171	1	1
	11	-5.42761	-0.0308594	2.42907	-0.072414	2.99854	0.103273	1	1
	12	1.26857	3.36964	-0.731811	2.55598	-0.536763	-5.92562	1	1
	13	3.01487	-1.85043	2.57236	-1.41258	-5.58723	3.26302	1	1
	14	5.48685	0.161182	-3.52244	2.56238	-1.96441	-2.72356	1	1
	15	0.192423	-0.318463	2.99871	-3.63494	-3.19113	3.9534	1	1
	16	-2.06443	-4.62576	1.43954	2.11684	0.624887	2.50892	1	1
	17	-4.81961	-2.57078	2.35086	-0.227342	2.46876	2.79812	1	1
	18	3.01315	-2.61279	-1.12239	0.337	-1.89076	2.27579	1	1
	19	-0.862395	2.09223	0.0160583	3.08405	0.846336	-5.17628	1	1
	20	1.38511	-4.84146	-1.60685	0.338704	0.221739	4.50275	1	1
	21	1.58386	0.916577	2.87484	1.09703	-4.4587	-2.01361	1	1
	22	3.56133	-3.78445	-2.85749	1.93943	-0.703845	1.84502	1	1
	23	0.308732	5.64753	-1.88561	-3.02535	1.57688	-2.62218	1	1
	24	0.281246	2.77081	-0.369383	1.42488	0.0881371	-4.19569	1	1
	25	-1.72513	-6.00232	0.614465	2.49888	1.11067	3.50344	1	1
	26	3.25409	-1.34525	2.8152	2.29152	-6.06928	-0.946268	1	1
	27	1.15305	-0.378843	-2.89084	-4.8747	1.73779	5.25354	1	1
	28	-0.306642	-2.8737	0.155518	-1.2441	0.151124	4.1178	1	1
	29	1.70162	3.54615	-1.82557	2.01158	0.123947	-5.55773	1	1
	30	-4.68593	-5.31093	1.73338	3.01954	2.95255	2.2914	1	1
	31	4.25881	2.63694	1.19586	-1.31513	-5.45467	-1.32181	1	1
	32	5.2199	3.00091	-1.69038	-5.35025	-3.52951	2.34935	1	1
	33	4.84855	1.92015	-1.02324	-1.11853	-3.82531	-0.801615	1	1
	34	3.55531	-2.45958	0.162693	-0.282082	-3.718	2.74166	1	1
	35	-0.23545	5.07812	1.39153	-5.49933	-1.15608	0.421206	1	1
	36	-3.40443	3.44781	2.91494	-1.65357	0.489492	-1.79424	1	1
	37	-1.42221	-3.03237	0.156907	-3.264	1.2653	6.29637	1	1
	38	3.70012	3.75262	-1.73498	-4.56843	-1.96515	0.815815	1	1
	39	0.597395	2.4861	1.75041	1.9264	-2.3478	-4.4125	1	1
	40	1.987	5.69938	3.86358	-2.40149	-5.85058	-3.29789	1	1
	41	0.981107	-4.02579	-2.23685	-1.42007	1.25575	5.44586	1	1
	42	1.48913	-1.76154	1.53467	-1.65601	-3.0238	3.41756	1	1
	43	-2.49495	2.88952	-0.959094	1.61065	3.45405	-4.50017	1	1
	44	-1.59896	5.69751	0.450845	-5.46192	1.14811	-0.235593	1	1
	45	-1.22785	-5.60309	1.40215	1.76091	-0.174299	3.84218	1	1
	46	2.23141	0.237217	2.387	-2.95304	-4.61841	2.71582	1	1
	47	0.145886	2.87827	-1.70976	-4.27175	1.56387	1.39349	1	1
	48	-4.41961	0.683428	4.7918	-2.20298	-0.372196	1.51955	1	1
	49	-4.44139	0.764136	4.8508	-2.55351	-0.409407	1.78938	1	1
	50	2.16989	-4.45326	-0.796335	-0.261228	-1.37356	4.71449	1	1
	51	0.953624	-4.03241	-0.78366	5.00077	-0.169964	-0.968358	1	1
	52	-2.10961	5.81914	0.276629	-2.78216	1.83298	-3.03698	1	1
	53	-2.63685	-4.63511	-0.391315	1.26006	3.02817	3.37505	1	1
	54	-0.968081	2.10814	0.606171	2.89786	0.36191	-5.00601	1	1
	55	-3.65702	-0.266218	-0.489568	-2.04336	4.14658	2.30958	1	1
	56	1.31863	1.13048	2.33002	2.0823	-3.64865	-3.21277	1	1
	57	2.86542	-0.743191	3.08739	-2.96769	-5.95281	3.71088	1	1
	58	-2.27533	2.69361	-0.572018	1.65245	2.84735	-4.34606	1	1
	59	-5.56033	-3.39137	2.40835	1.37053	3.15198	2.02084	1	1
	60	2.55014	5.86428	-1.10693	-2.33788	-1.44321	-3.5264	1	1
	61	2.50997	-1.85822	1.96642	-0.880131	-4.47639	2.73835	1	1
	62	-4.57813	2.19691	2.54622	0.427327	2.03191	-2.62423	1	1
	63	-1.40108	4.11504	1.52247	-5.55594	-0.121391	1.4409	1	1
	64	-3.47722	3.22864	1.51394	-5.66973	1.96328	2.44109	1	1
	65	-3.2563	4.58637	6.14961	-1.01163	-2.8933	-3.57475	1	1
	66	1.60217	-3.99848	1.61296	0.0750165	-3.21513	3.92346	1	1
	67	3.48915	-5.93151	-2.58173	3.53719	-0.907418	2.39432	1	1
	68	-3.50627	-1.42663	-2.15217	-0.418275	5.65844	1.84491	1	1
	69	-1.88819	5.4541	-0.574031	-0.76544	2.46222	-4.68866	1	1
	70	-0.989371	6.09347	2.84625	-3.41806	-1.85688	-2.67541	1	1
	71	-2.39625	1.39692	-1.71306	1.76739	4.10931	-3.16431	1	1
	72	-3.52478	-3.07838	1.89412	0.699792	1.63065	2.37859	1	1
	73	5.09904	0.588822	-1.75087	-1.58111	-3.34817	0.992284	1	1
	74	-4.41256	-0.731771	-1.96233	-1.4952	6.37488	2.22697	1	1
	75	0.973527	-6.78495	-0.570309	3.98799	-0.403218	2.79696	1	1
	76	-0.252843	-5.36304	-0.90989	2.61084	1.16273	2.7522	1	1
	77	2.36673	-2.37697	-2.79933	5.61787	0.432599	-3.2409	1	1
	78	-4.09961	0.550815	4.7799	-3.45152	-0.680299	2.9007	1	1
	79	-5.17819	-2.56027	2.57147	-0.720662	2.60672	3.28093	1	1
	80	-4.03738	3.83264	2.77445	-0.243517	1.26293	-3.58912	1	1
	81	0.740599	3.1751	1.26589	2.90838	-2.00649	-6.08348	1	1
	82	-5.96787	-1.3094	3.22124	0.983566	2.74663	0.32583	1	1
	83	4.26732	0.824812	-0.298274	0.0627513	-3.96905	-0.887564	1	1
	84	-2.01933	2.00782	-2.34396	0.55626	4.36328	-2.56408	1	1
	85	4.99069	1.43415	-1.30017	-0.0146343	-3.69051	-1.41951	1	1
	86	-1.51221	-5.53734	-1.15302	2.01409	2.66523	3.52325	1	1
	87	3.55342	-3.54241	-1.60173	1.1981	-1.95168	2.34431	1	1
	88	0.69867	-3.90705	2.74699	0.499109	-3.44566	3.40794	1	1
	89	1.48746	2.34543	3.8197	1.30133	-5.30716	-3.64675	1	1
	90	3.74893	0.935859	-0.65233	3.19752	-3.0966	-4.13338	1	1
	91	-1.36586	5.08731	-0.575102	0.238841	1.94097	-5.32615	1	1
	92	0.414021	-3.74151	3.69817	1.03824	-4.11219	2.70328	1	1
	93	-2.98548	-4.2816	2.62739	1.85702	0.358086	2.42457	1	1
	94	0.98347	2.90333	1.95471	1.04238	-2.93818	-3.94572	1	1
	95	-4.1078	-4.3432	3.00849	0.051496	1.09931	4.2917	1	1
	96	-0.734076	3.46967	-2.41346	1.86679	3.14754	-5.33647	1	1
	97	4.14501	3.09228	-1.66018	0.0884936	-2.48482	-3.18078	1	1
	98	3.71426	-4.68799	-2.49109	0.621948	-1.22316	4.06605	1	1
	99	2.90366	-2.98255	1.51167	-0.550715	-4.41533	3.53327	1	1
	100	-0.312551	3.16323	-0.410501	0.72149	0.723052	-3.88472	1	1
	101	4.35586	-3.33433	-3.15799	3.82438	-1.19787	-0.490047	1	1
	102	-2.3862	3.62443	1.55105	0.0925151	0.835149	-3.71694	1	1
	103	1.38409	3.81427	1.81551	2.57779	-3.1996	-6.39206	1	1
	104	1.05773	1.34707	3.65384	-0.111398	-4.71157	-1.23567	1	1
	105	-2.59397	-2.58371	-1.12624	-2.35499	3.72021	4.93869	1	1
	106	1.02668	2.22983	2.36442	3.2095	-3.3911	-5.43933	1	1
	107	-1.04848	2.95412	1.38613	2.1819	-0.337648	-5.13602	1	1
	108	1.33831	1.23817	1.75174	3.99149	-3.09005	-5.22966	1	1
	109	-2.04138	-4.65142	0.221591	0.68381	1.81979	3.96761	1	1
	110	2.09398	5.18551	0.614797	-5.80359	-2.70878	0.61808	1	1
	111	2.43308	4.20729	-0.731815	-1.59778	-1.70126	-2.60951	1	1
	112	3.60661	1.35625	2.20448	0.409489	-5.81109	-1.76574	1	1
	113	-3.98728	-2.27676	0.427679	-1.66273	3.5596	3.9395	1	1
	114	-2.00822	0.679943	-3.94104	0.601025	5.94926	-1.28097	1	1
	115	3.77799	3.56685	-0.415898	-1.67263	-3.36209	-1.89421	1	1
	116	0.898964	4.35833	0.740137	0.682482	-1.6391	-5.04081	1	1
	117	0.962168	-5.50483	0.534926	1.32398	-1.49709	4.18085	1	1
	118	-0.213133	1.9656	2.44618	-5.29602	-2.23305	3.33042	1	1
	119	3.14348	0.779895	-0.384685	-4.55683	-2.75879	3.77694	1	1

## Sheet: Figure 2a_3
			Fit of simulated coordinates (nm)
	Molecule #	X1	Y1	X2	Y2	X3	Y3	dX	dY
	1	0.829059	1.81507	1.1306	3.52518	-1.95965	-5.34025	1	1
	2	-2.21138	-0.959137	-2.21138	-2.69562	4.42276	3.65476	1	1
	3	-2.58088	-1.14437	-0.382418	-3.7644	2.9633	4.90877	1	1
	4	2.5	2.10825	2.5	-4.31963	-5	2.21138	1	1
	5	1.94726	0.659204	3.65736	0.357667	-5.60462	-1.01687	1	1
	6	0.501279	2.90868	0.501279	-5.75157	-1.00256	2.8429	1	1
	7	1.41747	0.431624	-1.08253	4.76175	-0.334936	-5.19338	1	1
	8	-3.71608	-2.46379	3.82798	3.86643	-0.111904	-1.40265	1	1
	9	-1.89941	0.421255	0.600587	4.75138	1.29883	-5.17264	1	1
	10	1.07482	-0.142248	4.28876	1.02753	-5.36357	-0.885281	1	1
	11	2.88675	0	-5.7735	0	2.88675	0	1	1
	12	-0.501279	2.90868	-0.501279	-5.75157	1.00256	2.8429	1	1
	13	2.5	-1.44338	2.5	-1.44338	-5	2.88675	1	1
	14	-1.98646	-2.47353	-3.69656	2.22493	5.68302	0.248599	1	1
	15	4.44089e-16	-8.88178e-16	3.21394	-3.83022	-3.21394	3.83022	1	1
	16	0.523779	2.90471	-2.4382	-5.23326	1.91442	2.32855	1	1
	17	2.29841	-0.214139	-4.90005	-2.83417	2.60164	3.0483	1	1
	18	-1.85557	2.21138	-1.85557	2.21138	3.71114	-4.42276	1	1
	19	-0.501279	2.8429	1.00256	-5.68579	-0.501279	2.8429	1	1
	20	-1.47088	0.178926	0.239216	4.87739	1.23167	-5.05632	1	1
	21	1.81507	0.829059	3.52518	1.1306	-5.34025	-1.95965	1	1
	22	-0.903402	1.85648	4.02064	-4.01176	-3.11724	2.15527	1	1
	23	1.24148	-2.5356	-2.12676	-3.12951	0.885281	5.66511	1	1
	24	-0.158268	1.98917	0.143269	3.69927	0.0149997	-5.68844	1	1
	25	0.987327	2.71266	0.987327	2.71266	-1.97465	-5.42532	1	1
	26	2.54594	2.1854	3.13985	-1.18284	-5.68579	-1.00256	1	1
	27	1.44338	-0.334936	1.44338	4.66506	-2.88675	-4.33013	1	1
	28	-0.189551	-1.98643	-0.783463	-3.61819	0.973015	5.60462	1	1
	29	1.6271	3.54195	-0.00466016	-5.71222	-1.62244	2.17027	1	1
	30	1.85557	2.21138	1.85557	2.21138	-3.71114	-4.42276	1	1
	31	1.29883	-1.44338	-5.12905	-1.44338	3.83022	2.88675	1	1
	32	-3.60844	2.5	5.05181	2.5	-1.44338	-5	1	1
	33	-0.880061	-1.31046	-4.2483	-0.716552	5.12836	2.02702	1	1
	34	3.83022	-3.21394	-3.83022	3.21394	0	0	1	1
	35	-0.275663	4.45011	1.43444	-5.24835	-1.15877	0.798235	1	1
	36	3.1766	-2.01111	-4.02186	4.02912	0.84526	-2.018	1	1
	37	0.353771	-2.99366	-1.35633	-2.69213	1.00256	5.68579	1	1
	38	-1.8465	0.600587	3.7202	3.81452	-1.87369	-4.41511	1	1
	39	0.987327	2.71266	-1.97465	-5.42532	0.987327	2.71266	1	1
	40	3.60844	-2.5	-5.05181	-2.5	1.44338	5	1	1
	41	-1.87797	-1.68771	0.742053	-3.88617	1.13592	5.57389	1	1
	42	1.85557	-2.21138	-3.71114	4.42276	1.85557	-2.21138	1	1
	43	-1.15737	1.62552	-2.48759	2.74171	3.64497	-4.36724	1	1
	44	0.374577	-5.01108	-1.3619	4.83699	0.987327	0.174092	1	1
	45	0.153373	3.75657	-1.47839	-5.49759	1.32501	1.74102	1	1
	46	2.29841	0.214139	-4.90005	2.83417	2.60164	-3.0483	1	1
	47	1.43554	1.93633	0.567302	3.44016	-2.00284	-5.37649	1	1
	48	-4.33464	1.04423	4.91953	-2.32401	-0.584889	1.27978	1	1
	49	-4.52213	0.595228	4.73204	-2.77301	-0.20991	2.17778	1	1
	50	-1.23905	4.86991	2.18115	-4.52702	-0.942097	-0.342895	1	1
	51	-0.142248	-1.07482	1.02753	-4.28876	-0.885281	5.36357	1	1
	52	0.104087	-2.71266	1.84057	-2.71266	-1.94465	5.42532	1	1
	53	-0.539276	1.4051	-2.73774	-4.63513	3.27702	3.23002	1	1
	54	-0.686706	2.31054	0.643516	3.42673	0.04319	-5.73726	1	1
	55	-0.963755	-2.09755	4.90449	2.82649	-3.94073	-0.728938	1	1
	56	1.51267	1.26928	-4.35557	-3.65476	2.8429	2.38547	1	1
	57	2.34434	-0.560563	2.64587	-2.27066	-4.99021	2.83123	1	1
	58	-0.567302	1.98515	3.26292	-4.64899	-2.69562	2.66383	1	1
	59	2.5	1.44338	2.5	1.44338	-5	-2.88675	1	1
	60	-0.987327	-2.71266	-0.987327	-2.71266	1.97465	5.42532	1	1
	61	2.5	-1.44338	-5	2.88675	2.5	-1.44338	1	1
	62	2.8073	0.299383	2.21338	-3.06886	-5.02068	2.76947	1	1
	63	0.145873	2.05946	1.4761	-5.4846	-1.62197	3.42514	1	1
	64	-3.49496	3.1667	1.42908	-5.36199	2.06588	2.19529	1	1
	65	-2.87961	4.21602	5.64908	-0.708016	-2.76947	-3.50801	1	1
	66	1.50481	0.0261807	-3.41923	4.15794	1.91442	-4.18412	1	1
	67	-0.595926	2.19155	-2.22769	2.78547	2.82361	-4.97702	1	1
	68	-2.13015	-0.293121	-3.24634	-1.62334	5.37649	1.91646	1	1
	69	-0.853249	-0.519146	2.36069	-4.34937	-1.50744	4.86851	1	1
	70	-2.09101	-2.38581	2.83303	-3.25405	-0.742024	5.63985	1	1
	71	-1.42206	1.39985	-2.92589	2.26809	4.34795	-3.66795	1	1
	72	2.05478	0.967432	2.35631	2.67753	-4.41109	-3.64497	1	1
	73	-1.71559	-1.39574	-3.91405	1.22429	5.62964	0.171448	1	1
	74	-1.93633	-1.43554	-3.44016	-0.567302	5.37649	2.00284	1	1
	75	-0.501279	1.93146	-0.501279	3.66795	1.00256	-5.59941	1	1
	76	-0.501279	2.90868	-0.501279	-5.75157	1.00256	2.8429	1	1
	77	0.62034	-2.79956	2.2521	-2.20565	-2.87244	5.00521	1	1
	78	-0.32339	2.63089	4.60065	-3.23735	-4.27726	0.606451	1	1
	79	2.5	-0.353771	2.5	3.06643	-5	-2.71266	1	1
	80	2.47023	-0.522614	1.30045	-3.73655	-3.77068	4.25917	1	1
	81	0.987327	2.71266	0.987327	2.71266	-1.97465	-5.42532	1	1
	82	2.8429	0.501279	2.8429	0.501279	-5.68579	-1.00256	1	1
	83	-4.35557	-0.768004	5.3429	0.942097	-0.987327	-0.174092	1	1
	84	-2.5	1.44338	5	-2.88675	-2.5	1.44338	1	1
	85	-1.08319	-0.046553	-4.04517	-1.75665	5.12836	1.80321	1	1
	86	-1.44338	2.22325	-1.44338	-5.43719	2.88675	3.21394	1	1
	87	-1.54452	1.35677	-2.13843	2.98853	3.68295	-4.34531	1	1
	88	2.77676	0.319565	1.06666	-4.3789	-3.84341	4.05933	1	1
	89	1.44647	2.29719	2.95031	1.42895	-4.39678	-3.72614	1	1
	90	-0.367657	3.49496	3.96247	0.994959	-3.59481	-4.48992	1	1
	91	-0.487068	-0.12445	-1.35531	4.79959	1.84238	-4.67514	1	1
	92	0.651181	-3.6628	-4.91552	2.97134	4.26434	0.691457	1	1
	93	2.77912	2.53217	-3.26111	-4.66629	0.481996	2.13412	1	1
	94	1.42895	3.47757	-3.26952	-4.66041	1.84057	1.18284	1	1
	95	2.77676	-0.319565	1.06666	4.3789	-3.84341	-4.05933	1	1
	96	-2.11432	1.93701	-0.784098	3.0532	2.89842	-4.99021	1	1
	97	-1.57493	-0.106923	-2.7447	-3.32086	4.31963	3.42778	1	1
	98	-1.03029	3.75917	3.66817	-4.37881	-2.63788	0.619642	1	1
	99	1.27453	-0.232901	2.98463	-3.19488	-4.25917	3.42778	1	1
	100	-0.501279	1.93146	-0.501279	3.66795	1.00256	-5.59941	1	1
	101	-1.24177	-0.808401	-2.95188	3.89006	4.19365	-3.08166	1	1
	102	1.48649	-0.235524	-2.64527	4.68851	1.15877	-4.45299	1	1
	103	1.74997	1.65763	1.15606	3.28939	-2.90603	-4.94702	1	1
	104	1.24641	1.42301	4.20839	-0.28709	-5.4548	-1.13592	1	1
	105	-1.44338	-2.5	2.88675	5	-1.44338	-2.5	1	1
	106	0.658565	2.04689	2.1624	2.91513	-2.82097	-4.96202	1	1
	107	0.829975	2.58467	-0.801784	3.17858	-0.0281902	-5.76324	1	1
	108	1.67141	1.21205	-3.25263	-4.65619	1.58123	3.44414	1	1
	109	0.046553	1.08319	1.75665	4.04517	-1.80321	-5.12836	1	1
	110	-2.79457	0.541825	2.12946	4.67358	0.665111	-5.21541	1	1
	111	-0.857519	-1.8018	-1.97371	-3.13203	2.83123	4.93383	1	1
	112	2.05946	-0.145873	-5.4846	-1.4761	3.42514	1.62197	1	1
	113	0.28709	-1.4774	3.50103	4.0893	-3.78812	-2.6119	1	1
	114	-1.93146	0.501279	-3.66795	0.501279	5.59941	-1.00256	1	1
	115	-0.378781	-1.53243	-3.74702	-2.12634	4.1258	3.65877	1	1
	116	0.825434	0.802219	-1.37303	-5.23801	0.547595	4.43579	1	1
	117	0.694865	1.41739	-1.5036	4.03741	0.808734	-5.4548	1	1
	118	-0.213965	2.05351	2.40606	-5.14496	-2.1921	3.09145	1	1
	119	3.21919	0.575796	0.00524953	-4.99091	-3.22444	4.41511	1	1
