# Supplementary material for: Deciphering a hexameric protein complex with Angstrom optical resolution
Source: eLife journal article supplement (doi:10.7554/elife.76308), 2022-05-13
Supplement: fig2-data3 [file Figure 2-source data 3.xlsx]

## Sheet: Figure 2c
			FSC curve
		x (spatial frequency 1/Å)	y (Correlation)
		0	1
		0.00555556	0.975756
		0.0111111	0.864814
		0.0166667	0.742345
		0.0222222	0.645304
		0.0277778	0.589779
		0.0333333	0.509025
		0.0388889	0.404047
		0.0444444	0.350019
		0.05	0.284625
		0.0555556	0.340937
		0.0611111	0.265537
		0.0666667	0.312378
		0.0722222	0.294006
		0.0777778	0.285579
		0.0833333	0.290917
		0.0888889	0.25458
		0.0944444	0.287682
		0.1	0.237223
		0.105556	0.291841
		0.111111	0.230471
		0.116667	0.283245
		0.122222	0.24046
		0.127778	0.242433
		0.133333	0.275932
		0.138889	0.201563
		0.144444	0.278205
		0.15	0.214969
		0.155556	0.262088
		0.161111	0.234337
		0.166667	0.22799
		0.172222	0.241421
		0.177778	0.202596
		0.183333	0.247866
		0.188889	0.203831
		0.194444	0.227095
		0.2	0.207291
		0.205556	0.186257
		0.211111	0.198012
		0.216667	0.176116
		0.222222	0.188256
		0.227778	0.17151
		0.233333	0.168987
		0.238889	0.159612
		0.244444	0.158924
		0.25	0.147426
		0.255556	0.149436
		0.261111	0.14967
		0.266667	0.125618
		0.272222	0.121736
		0.277778	0.119374
		0.283333	0.105355
		0.288889	0.101948
		0.294444	0.0982237
		0.3	0.0920241
		0.305556	0.0822198
		0.311111	0.0932348
		0.316667	0.0689526
		0.322222	0.0734439
		0.327778	0.0588463
		0.333333	0.05299
