# Supplementary material for: Deciphering a hexameric protein complex with Angstrom optical resolution
Source: eLife journal article supplement (doi:10.7554/elife.76308), 2022-05-13
Supplement: fig2-data4 [file Figure 2-source data 4.xlsx]

## Sheet: Figure 2d
		Pairwise distances between flourophores on each molecule					Distance histogram				Model Fit
							distance	probability			distance	Fit
	Molecule #	D1	D2	D3
	1	9.69328	7.77241	1.93319			0.607326	0.022409			0	0.0042766
	2	9.03495	10.0263	1.11622			1.5921	0.092437			0.1	0.0126464
	3	8.7224	9.76972	3.6287			2.57688	0.0672269			0.2	0.0208929
	4	6.89022	9.29787	6.37038			3.56165	0.0588235			0.3	0.0287195
	5	1.83511	7.87733	6.23467			4.54643	0.0672269			0.4	0.0362482
	6	1.27844	10.8329	9.97714			5.5312	0.0448179			0.5	0.0433806
	7	4.28472	9.38993	5.90667			6.51598	0.120448			0.6	0.0497208
	8	3.80234	10.5742	7.19658			7.50075	0.134454			0.7	0.055653
	9	10.1667	4.67194	6.74665			8.48553	0.114846			0.8	0.0606062
	10	7.04204	10.8663	3.95389			9.47031	0.168067			0.9	0.065026
	11	7.85679	8.42722	0.595957			10.4551	0.0840336			1	0.0688553
	12	2.15953	9.46896	8.48385			11.4399	0.0252101			1.1	0.0718431
	13	0.62252	10.0072	9.40427							1.2	0.074596
	14	9.32379	7.99018	5.51078							1.3	0.0764065
	15	4.34445	5.44952	9.79271							1.4	0.0779785
	16	7.59872	7.62471	0.904096							1.5	0.0788731
	17	7.54369	9.05237	3.02776							1.6	0.0794502
	18	5.07976	6.92435	2.0855							1.7	0.0798807
	19	1.32491	7.46666	8.30196							1.8	0.0798425
	20	5.98213	9.41635	4.54786							1.9	0.0797012
	21	1.30352	6.71555	7.96598							2	0.0795119
	22	8.60024	7.06276	2.15571							2.1	0.078994
	23	8.94617	8.36638	3.48588							2.2	0.0785315
	24	1.49494	6.96918	5.63916							2.3	0.0783518
	25	8.81726	9.91974	1.12044							2.4	0.0775428
	26	3.66315	9.3319	9.45607							2.5	0.0771434
	27	6.04696	5.66266	11.1358							2.6	0.0769176
	28	1.69387	7.00647	5.3619							2.7	0.076398
	29	3.84655	9.23958	7.81633							2.8	0.0763965
	30	10.5169	10.7769	1.42006							2.9	0.0758844
	31	5.00005	10.4892	6.65053							3	0.0756597
	32	10.8395	8.77364	7.9162							3.1	0.0756142
	33	6.61146	9.09087	2.81994							3.2	0.0755395
	34	4.0313	8.9417	4.91964							3.3	0.0753342
	35	10.7018	4.74704	6.44539							3.4	0.0756726
	36	8.12149	6.53006	2.42952							3.5	0.0753636
	37	1.59601	9.70814	9.6244							3.6	0.0753484
	38	9.93882	6.38123	5.38917							3.7	0.0758213
	39	1.28168	7.50099	7.54831							3.8	0.0758049
	40	8.31539	11.9322	9.75543							3.9	0.0760904
	41	4.14066	9.47563	7.70319							4	0.0762809
	42	0.114938	6.86947	6.82061							4.1	0.0765382
	43	1.99859	9.48673	7.53776							4.2	0.0770487
	44	11.3461	6.53821	5.27263							4.3	0.0773343
	45	7.81956	9.50385	2.61091							4.4	0.0776891
	46	3.19405	7.28447	9.01176							4.5	0.0780829
	47	7.38689	2.05311	6.54306							4.6	0.0784434
	48	9.65305	4.13287	6.36585							4.7	0.0789839
	49	9.86669	4.16029	6.82132							4.8	0.0793943
	50	5.13534	9.82872	5.00909							4.9	0.0798149
	51	9.19872	3.26357	6.00059							5	0.0804657
	52	8.92616	9.69406	1.57708							5.1	0.0809743
	53	6.30837	9.81097	4.0207							5.2	0.0816482
	54	1.76123	7.2374	7.90764							5.3	0.0821778
	55	3.63194	8.21772	6.35941							5.4	0.0830723
	56	1.38884	6.59831	7.98638							5.5	0.0836181
	57	2.23555	9.87927	11.2396							5.6	0.0845285
	58	1.99632	8.70625	6.90465							5.7	0.0853039
	59	9.28308	10.2565	0.987869							5.8	0.0862586
	60	8.98051	10.2045	1.23518							5.9	0.0868217
	61	1.11897	8.36287	7.3894							6	0.0879313
	62	7.34084	8.18145	3.0946							6.1	0.0890843
	63	10.1032	2.96457	7.18735							6.2	0.0901338
	64	10.2026	5.49721	8.12326							6.3	0.0912996
	65	10.9457	8.16919	9.39914							6.4	0.0927205
	66	4.07351	9.27165	6.17421							6.5	0.093834
	67	11.2477	9.41537	2.02718							6.6	0.0951875
	68	1.68831	9.73113	8.13188							6.7	0.0965144
	69	6.35686	11.0364	4.96089							6.8	0.0984318
	70	10.2558	8.81169	4.7614							6.9	0.100341
	71	0.777168	7.94526	7.63032							7	0.101948
	72	6.60598	7.50712	1.69934							7.1	0.104038
	73	7.18539	8.45684	3.02881							7.2	0.106335
	74	2.56641	11.1858	9.13037							7.3	0.10863
	75	10.883	9.68032	1.20269							7.4	0.111487
	76	8.00091	8.23778	2.07744							7.5	0.113962
	77	9.5187	2.11832	9.42991							7.6	0.117022
	78	9.73983	4.14893	8.37642							7.7	0.120045
	79	7.96501	9.73265	4.00175							7.8	0.123278
	80	7.93827	9.12008	3.67121							7.9	0.126541
	81	0.589129	9.65753	9.5688							8	0.130096
	82	9.47087	8.86658	0.811096							8.1	0.133863
	83	4.62876	8.41249	3.79179							8.2	0.137585
	84	1.48742	7.85111	7.39754							8.3	0.14103
	85	6.45553	9.13819	2.77262							8.4	0.144468
	86	7.55996	9.97724	4.10568							8.5	0.148354
	87	7.00342	8.05975	1.19845							8.6	0.151028
	88	4.859	8.40741	6.8418							8.7	0.154109
	89	2.55529	9.05942	10.3819							8.8	0.156072
	90	4.94836	8.51813	7.72765							8.9	0.158138
	91	4.91254	10.9259	6.10735							9	0.159522
	92	5.79928	7.8754	7.98587							9.1	0.16
	93	8.31787	7.49347	2.3392							9.2	0.159763
	94	2.09915	7.89233	6.98724							9.3	0.158619
	95	8.3639	10.0834	4.65019							9.4	0.156632
	96	2.32154	9.62367	9.10009							9.5	0.153822
	97	6.53628	9.12721	3.37167							9.6	0.149987
	98	8.16712	10.0504	3.67008							9.7	0.145599
	99	2.80205	9.79915	7.19779							9.8	0.140121
	100	2.4437	7.12362	4.74364							9.9	0.133995
	101	10.3781	6.23971	4.73881							10	0.127021
	102	5.28927	8.01704	3.87614							10.1	0.119484
	103	1.30958	11.1884	10.2767							10.2	0.111639
	104	2.97774	6.32103	8.44062							10.3	0.103439
	105	1.48544	9.82117	8.75705							10.4	0.0950441
	106	1.65811	8.85058	10.3889							10.5	0.0866866
	107	2.55415	8.12131	7.51821							10.6	0.078205
	108	2.78418	7.83857	10.415							10.7	0.0701171
	109	5.79531	9.44437	3.65206							10.8	0.0621434
	110	11.0882	6.62781	7.23077							10.9	0.0547968
	111	6.61177	7.97255	1.40122							11	0.0479227
	112	1.69183	9.92168	8.30548							11.1	0.0413985
	113	4.45746	9.77739	6.41825							11.2	0.0353187
	114	1.93443	8.19552	10.0678							11.3	0.0301073
	115	6.71124	8.9891	2.95451							11.4	0.0252486
	116	3.67928	9.73579	6.19813							11.5	0.0210675
	117	6.84216	9.99301	3.50582							11.6	0.0174075
	118	7.73325	2.43778	9.8138							11.7	0.0141364
	119	6.39755	6.6196	8.66534							11.8	0.0115719
											11.9	0.00930507
											12	0.00735387
											12.1	0.00581339
											12.2	0.00450312
											12.3	0.00345315
											12.4	0.00264149
											12.5	0.00203309
											12.6	0.00153142
											12.7	0.0011226
											12.8	0.00083271
											12.9	0.00061177
											13	0.000428723
											13.1	0.000318411
											13.2	0.000222098
											13.3	0.000159048
											13.4	0.000104102
											13.5	7.48397e-05
											13.6	5.18931e-05
											13.7	3.242e-05
											13.8	2.26308e-05
											13.9	1.47364e-05
											14	8.84182e-06
											14.1	5.15773e-06
											14.2	4.84195e-06
											14.3	2.84201e-06
											14.4	1.47364e-06
											14.5	1.26312e-06
											14.6	3.15779e-07
											14.7	3.15779e-07
											14.8	2.1052e-07
											14.9	2.1052e-07
											15	0
