# Supplementary material for: Deciphering a hexameric protein complex with Angstrom optical resolution
Source: eLife journal article supplement (doi:10.7554/elife.76308), 2022-05-13
Supplement: fig2-figsupp3-data1 [file Figure 2 -figure supplement 3 -source data 1.xlsx]

## Sheet: Fig2_supplemnt 1
		Normalized center of mass coordinates (nm)
	Molecule #	X1	Y1	X2	Y2	X3	Y3	dX	dY
	1	-2.15719	-5.40701	1.33396	3.63576	0.823227	1.77125	1	1
	2	4.87562	4.07055	-2.2213	-1.52087	-2.65431	-2.54968	1	1					To generate normalized 2D images, the localization precision (dX and dY) is set to 1.
	3	2.97594	5.27238	-2.73618	-1.31943	-0.239766	-3.95295	1	1
	4	-4.4895	2.25755	2.39768	2.05275	2.09183	-4.31029	1	1
	5	3.19585	0.07282	1.44736	0.629949	-4.64321	-0.702769	1	1
	6	-0.834466	3.83209	0.190029	3.06735	0.644437	-6.89944	1	1
	7	-0.9257	4.35199	1.26121	0.667389	-0.335506	-5.01937	1	1
	8	-3.83969	-2.74998	-0.25036	-1.49519	4.09005	4.24517	1	1
	9	0.498372	4.74488	1.25076	-5.39394	-1.74913	0.649061	1	1
	10	-5.90135	-0.834458	1.12307	-0.336538	4.77828	1.171	1	1
	11	-5.42761	-0.0308594	2.42907	-0.072414	2.99854	0.103273	1	1
	12	1.26857	3.36964	-0.731811	2.55598	-0.536763	-5.92562	1	1
	13	3.01487	-1.85043	2.57236	-1.41258	-5.58723	3.26302	1	1
	14	5.48685	0.161182	-3.52244	2.56238	-1.96441	-2.72356	1	1
	15	0.192423	-0.318463	2.99871	-3.63494	-3.19113	3.9534	1	1
	16	-2.06443	-4.62576	1.43954	2.11684	0.624887	2.50892	1	1
	17	-4.81961	-2.57078	2.35086	-0.227342	2.46876	2.79812	1	1
	18	3.01315	-2.61279	-1.12239	0.337	-1.89076	2.27579	1	1
	19	-0.862395	2.09223	0.0160583	3.08405	0.846336	-5.17628	1	1
	20	1.38511	-4.84146	-1.60685	0.338704	0.221739	4.50275	1	1
	21	1.58386	0.916577	2.87484	1.09703	-4.4587	-2.01361	1	1
	22	3.56133	-3.78445	-2.85749	1.93943	-0.703845	1.84502	1	1
	23	0.308732	5.64753	-1.88561	-3.02535	1.57688	-2.62218	1	1
	24	0.281246	2.77081	-0.369383	1.42488	0.0881371	-4.19569	1	1
	25	-1.72513	-6.00232	0.614465	2.49888	1.11067	3.50344	1	1
	26	3.25409	-1.34525	2.8152	2.29152	-6.06928	-0.946268	1	1
	27	1.15305	-0.378843	-2.89084	-4.8747	1.73779	5.25354	1	1
	28	-0.306642	-2.8737	0.155518	-1.2441	0.151124	4.1178	1	1
	29	1.70162	3.54615	-1.82557	2.01158	0.123947	-5.55773	1	1
	30	-4.68593	-5.31093	1.73338	3.01954	2.95255	2.2914	1	1
	31	4.25881	2.63694	1.19586	-1.31513	-5.45467	-1.32181	1	1
	32	5.2199	3.00091	-1.69038	-5.35025	-3.52951	2.34935	1	1
	33	4.84855	1.92015	-1.02324	-1.11853	-3.82531	-0.801615	1	1
	34	3.55531	-2.45958	0.162693	-0.282082	-3.718	2.74166	1	1
	35	-0.23545	5.07812	1.39153	-5.49933	-1.15608	0.421206	1	1
	36	-3.40443	3.44781	2.91494	-1.65357	0.489492	-1.79424	1	1
	37	-1.42221	-3.03237	0.156907	-3.264	1.2653	6.29637	1	1
	38	3.70012	3.75262	-1.73498	-4.56843	-1.96515	0.815815	1	1
	39	0.597395	2.4861	1.75041	1.9264	-2.3478	-4.4125	1	1
	40	1.987	5.69938	3.86358	-2.40149	-5.85058	-3.29789	1	1
	41	0.981107	-4.02579	-2.23685	-1.42007	1.25575	5.44586	1	1
	42	1.48913	-1.76154	1.53467	-1.65601	-3.0238	3.41756	1	1
	43	-2.49495	2.88952	-0.959094	1.61065	3.45405	-4.50017	1	1
	44	-1.59896	5.69751	0.450845	-5.46192	1.14811	-0.235593	1	1
	45	-1.22785	-5.60309	1.40215	1.76091	-0.174299	3.84218	1	1
	46	2.23141	0.237217	2.387	-2.95304	-4.61841	2.71582	1	1
	47	0.145886	2.87827	-1.70976	-4.27175	1.56387	1.39349	1	1
	48	-4.41961	0.683428	4.7918	-2.20298	-0.372196	1.51955	1	1
	49	-4.44139	0.764136	4.8508	-2.55351	-0.409407	1.78938	1	1
	50	2.16989	-4.45326	-0.796335	-0.261228	-1.37356	4.71449	1	1
	51	0.953624	-4.03241	-0.78366	5.00077	-0.169964	-0.968358	1	1
	52	-2.10961	5.81914	0.276629	-2.78216	1.83298	-3.03698	1	1
	53	-2.63685	-4.63511	-0.391315	1.26006	3.02817	3.37505	1	1
	54	-0.968081	2.10814	0.606171	2.89786	0.36191	-5.00601	1	1
	55	-3.65702	-0.266218	-0.489568	-2.04336	4.14658	2.30958	1	1
	56	1.31863	1.13048	2.33002	2.0823	-3.64865	-3.21277	1	1
	57	2.86542	-0.743191	3.08739	-2.96769	-5.95281	3.71088	1	1
	58	-2.27533	2.69361	-0.572018	1.65245	2.84735	-4.34606	1	1
	59	-5.56033	-3.39137	2.40835	1.37053	3.15198	2.02084	1	1
	60	2.55014	5.86428	-1.10693	-2.33788	-1.44321	-3.5264	1	1
	61	2.50997	-1.85822	1.96642	-0.880131	-4.47639	2.73835	1	1
	62	-4.57813	2.19691	2.54622	0.427327	2.03191	-2.62423	1	1
	63	-1.40108	4.11504	1.52247	-5.55594	-0.121391	1.4409	1	1
	64	-3.47722	3.22864	1.51394	-5.66973	1.96328	2.44109	1	1
	65	-3.2563	4.58637	6.14961	-1.01163	-2.8933	-3.57475	1	1
	66	1.60217	-3.99848	1.61296	0.0750165	-3.21513	3.92346	1	1
	67	3.48915	-5.93151	-2.58173	3.53719	-0.907418	2.39432	1	1
	68	-3.50627	-1.42663	-2.15217	-0.418275	5.65844	1.84491	1	1
	69	-1.88819	5.4541	-0.574031	-0.76544	2.46222	-4.68866	1	1
	70	-0.989371	6.09347	2.84625	-3.41806	-1.85688	-2.67541	1	1
	71	-2.39625	1.39692	-1.71306	1.76739	4.10931	-3.16431	1	1
	72	-3.52478	-3.07838	1.89412	0.699792	1.63065	2.37859	1	1
	73	5.09904	0.588822	-1.75087	-1.58111	-3.34817	0.992284	1	1
	74	-4.41256	-0.731771	-1.96233	-1.4952	6.37488	2.22697	1	1
	75	0.973527	-6.78495	-0.570309	3.98799	-0.403218	2.79696	1	1
	76	-0.252843	-5.36304	-0.90989	2.61084	1.16273	2.7522	1	1
	77	2.36673	-2.37697	-2.79933	5.61787	0.432599	-3.2409	1	1
	78	-4.09961	0.550815	4.7799	-3.45152	-0.680299	2.9007	1	1
	79	-5.17819	-2.56027	2.57147	-0.720662	2.60672	3.28093	1	1
	80	-4.03738	3.83264	2.77445	-0.243517	1.26293	-3.58912	1	1
	81	0.740599	3.1751	1.26589	2.90838	-2.00649	-6.08348	1	1
	82	-5.96787	-1.3094	3.22124	0.983566	2.74663	0.32583	1	1
	83	4.26732	0.824812	-0.298274	0.0627513	-3.96905	-0.887564	1	1
	84	-2.01933	2.00782	-2.34396	0.55626	4.36328	-2.56408	1	1
	85	4.99069	1.43415	-1.30017	-0.0146343	-3.69051	-1.41951	1	1
	86	-1.51221	-5.53734	-1.15302	2.01409	2.66523	3.52325	1	1
	87	3.55342	-3.54241	-1.60173	1.1981	-1.95168	2.34431	1	1
	88	0.69867	-3.90705	2.74699	0.499109	-3.44566	3.40794	1	1
	89	1.48746	2.34543	3.8197	1.30133	-5.30716	-3.64675	1	1
	90	3.74893	0.935859	-0.65233	3.19752	-3.0966	-4.13338	1	1
	91	-1.36586	5.08731	-0.575102	0.238841	1.94097	-5.32615	1	1
	92	0.414021	-3.74151	3.69817	1.03824	-4.11219	2.70328	1	1
	93	-2.98548	-4.2816	2.62739	1.85702	0.358086	2.42457	1	1
	94	0.98347	2.90333	1.95471	1.04238	-2.93818	-3.94572	1	1
	95	-4.1078	-4.3432	3.00849	0.051496	1.09931	4.2917	1	1
	96	-0.734076	3.46967	-2.41346	1.86679	3.14754	-5.33647	1	1
	97	4.14501	3.09228	-1.66018	0.0884936	-2.48482	-3.18078	1	1
	98	3.71426	-4.68799	-2.49109	0.621948	-1.22316	4.06605	1	1
	99	2.90366	-2.98255	1.51167	-0.550715	-4.41533	3.53327	1	1
	100	-0.312551	3.16323	-0.410501	0.72149	0.723052	-3.88472	1	1
	101	4.35586	-3.33433	-3.15799	3.82438	-1.19787	-0.490047	1	1
	102	-2.3862	3.62443	1.55105	0.0925151	0.835149	-3.71694	1	1
	103	1.38409	3.81427	1.81551	2.57779	-3.1996	-6.39206	1	1
	104	1.05773	1.34707	3.65384	-0.111398	-4.71157	-1.23567	1	1
	105	-2.59397	-2.58371	-1.12624	-2.35499	3.72021	4.93869	1	1
	106	1.02668	2.22983	2.36442	3.2095	-3.3911	-5.43933	1	1
	107	-1.04848	2.95412	1.38613	2.1819	-0.337648	-5.13602	1	1
	108	1.33831	1.23817	1.75174	3.99149	-3.09005	-5.22966	1	1
	109	-2.04138	-4.65142	0.221591	0.68381	1.81979	3.96761	1	1
	110	2.09398	5.18551	0.614797	-5.80359	-2.70878	0.61808	1	1
	111	2.43308	4.20729	-0.731815	-1.59778	-1.70126	-2.60951	1	1
	112	3.60661	1.35625	2.20448	0.409489	-5.81109	-1.76574	1	1
	113	-3.98728	-2.27676	0.427679	-1.66273	3.5596	3.9395	1	1
	114	-2.00822	0.679943	-3.94104	0.601025	5.94926	-1.28097	1	1
	115	3.77799	3.56685	-0.415898	-1.67263	-3.36209	-1.89421	1	1
	116	0.898964	4.35833	0.740137	0.682482	-1.6391	-5.04081	1	1
	117	0.962168	-5.50483	0.534926	1.32398	-1.49709	4.18085	1	1
	118	-0.213133	1.9656	2.44618	-5.29602	-2.23305	3.33042	1	1
	119	3.14348	0.779895	-0.384685	-4.55683	-2.75879	3.77694	1	1
