# Supplementary material for: Deciphering a hexameric protein complex with Angstrom optical resolution
Source: eLife journal article supplement (doi:10.7554/elife.76308), 2022-05-13
Supplement: fig3-data2 [file Figure 3-source data 2.xlsx]

## Sheet: Raw data
		molecule #	X1 (nm)	Y1 (nm)	dX1 (nm)	dY1 (nm)	<dX1,dY1> (nm)	X2 (nm)	Y2 (nm)	dX2 (nm)	dY2 (nm)	<dX2,dY2> (nm)	X3 (nm)	Y3 (nm)	dX3 (nm)	dY3 (nm)	<dX3,dY3> (nm)
		1	0.74492	0.44449	0.594112	0.626075	0.610094	0.454336	-0.662957	0.335164	0.363016	0.34909	-4.13954	-6.07135	3.49403	4.07203	3.78303
		2	-0.722796	-1.53282	1.71973	1.96577	1.84275	0.176831	0.23029	0.240428	0.25894	0.249684	1.6262	-1.15958	0.65362	0.741909	0.697765
		3	2.04335	-1.59665	0.741643	0.741664	0.741653	0.192358	-0.711713	0.557012	0.590843	0.573927	-3.0247	-0.174914	1.00041	0.978227	0.989317
		4	7.83084	5.6062	1.28001	1.33498	1.30749	7.98227	16.1414	0.770755	0.825624	0.79819	9.81094	12.788	0.977764	1.06724	1.0225
		5	7.42412	0.434974	2.48428	2.22205	2.35316	3.66561	1.80143	0.7742	0.764589	0.769395	6.60334	-0.639153	0.777929	0.779217	0.778573
		6	2.53024	-8.79204	2.91765	2.45004	2.68384	3.14354	-5.18305	0.319105	0.319886	0.319496	10.6893	-8.39903	7.49889	7.429	7.46395
		7	10.5885	3.84273	3.96163	1.72256	2.8421	13.7645	6.62315	0.693042	0.563302	0.628172	10.8566	11.2168	4.53372	4.40682	4.47027
		8	14.3304	-25.8026	0.347373	0.372118	0.359745	16.9448	-25.3597	1.17822	1.21205	1.19513	16.9475	-37.742	3.01381	3.63161	3.32271
		9	-1.93541	8.35717	8.30765	2.68911	5.49838	-0.128194	-4.60817	0.135923	0.129861	0.132892	-1.4062	-3.2107	0.160263	0.155309	0.157786
		10	-0.669585	0.486244	0.294593	0.299074	0.296834	-0.62246	1.11617	0.447004	0.451402	0.449203	0.822975	2.14615	1.56323	1.6162	1.58971
		11	-0.331806	-0.103247	0.294606	0.299038	0.296822	-0.284019	0.538395	0.446572	0.450706	0.448639	1.16142	1.54579	1.56323	1.6162	1.58971
		12	-3.26359	-1.78718	8.34367	7.20077	7.77222	-1.75633	0.0153722	0.748686	0.814907	0.781797	-0.795982	-0.0579366	0.423691	0.468198	0.445944
		13	-11.9162	-2.99848	0.660469	0.651972	0.65622	-12.3683	-1.54618	0.606249	0.621158	0.613703	-8.27196	5.33231	2.39634	2.79755	2.59695
		14	9.73186	-5.63958	2.13878	2.47771	2.30825	0.531735	-0.784112	0.765966	0.801643	0.783805	0.515902	0.771845	0.597284	0.657666	0.627475
		15	-3.56964	2.01522	3.36789	3.44343	3.40566	-1.08127	-1.60257	0.236841	0.295429	0.266135	0.42613	-4.39853	0.63267	0.833562	0.733116
		16	-17.1401	-0.85351	0.485222	0.511649	0.498435	-15.0571	-0.637848	0.106229	0.123875	0.115052	-13.4559	-2.07576	0.0999964	0.117291	0.108644
		17	2.38947	-1.67032	2.72926	2.35467	2.54196	9.11526	7.79037	2.76538	3.33315	3.04927	-9.08157	-6.88138	9.83608	16.8256	13.3308
		18	-0.378536	-2.46468	10.3064	5.94134	8.12388	1.29881	-0.119464	1.04744	1.09971	1.07358	-1.55428	-0.555586	0.366743	0.36431	0.365526
		19	7.51241	7.80786	0.412036	0.418817	0.415427	13.1868	7.87783	1.57338	1.71206	1.64272	-3.15426	5.58735	11.6729	17.4916	14.5823
		20	-0.773472	5.98008	0.741556	0.742248	0.741902	-2.26709	6.23373	1.12979	1.1133	1.12154	10.6964	3.34586	1.58805	1.7223	1.65518
		21	2.23206	7.37988	5.69253	6.87392	6.28322	-0.44234	-0.75231	0.396533	0.412669	0.404601	0.768391	1.26876	0.860523	0.901398	0.88096
		22	5.91907	-9.5624	1.05053	1.07148	1.06101	3.38315	-8.93002	0.643244	0.644333	0.643789	1.42459	-10.1123	0.337961	0.347229	0.342595
		23	112.901	-11.1287	5.36728	2.55374	3.96051	-39.5348	3.57349	16.9162	5.19689	11.0565	-161.594	11.1771	15.761	7.21144	11.4862
		24	0.576093	-0.158958	0.561248	0.56931	0.565279	-0.158369	-1.34125	0.501824	0.516073	0.508948	0.59565	-4.00942	1.90927	1.87071	1.88999
		25	-0.635054	0.817319	0.267454	0.280618	0.274036	-1.14352	1.37276	0.144767	0.15684	0.150803	-3.03953	1.57018	0.829872	0.845491	0.837681
		26	15.979	1.78413	1.33704	1.33068	1.33386	-8.72511	24.0949	5.55922	5.7996	5.67941	-73.9021	-133.893	61.494	50.149	55.8215
		27	-16.8409	-2.45985	6.00266	5.78191	5.89228	-15.5556	-0.682658	0.875133	0.840969	0.858051	-14.4703	1.51359	0.683443	0.714725	0.699084
		28	2.72873	3.3829	0.549349	0.604807	0.577078	4.20434	-3.18372	0.633258	0.691715	0.662486	4.02015	-10.6612	0.165837	0.176713	0.171275
		29	-6.96256	1.13277	1.80718	1.75763	1.7824	-5.0185	-4.55702	2.34525	2.76555	2.5554	-0.646842	-1.5556	0.286826	0.319432	0.303129
		30	-30.2938	2.28229	0.33106	0.292195	0.311628	-19.1455	0.822068	0.596021	0.476548	0.536285	-8.91499	-0.794747	0.676395	0.520769	0.598582
		31	-17.4419	35.3422	1.01533	0.922327	0.968827	-14.6134	35.8502	0.468584	0.455215	0.4619	-7.44817	36.5737	0.329581	0.336925	0.333253
		32	1.64025	-0.858298	0.577971	0.680458	0.629215	1.891	-0.000531149	0.2911	0.34117	0.316135	1.51169	0.582323	0.153832	0.182019	0.167925
		33	-0.293082	2.20436	0.328149	0.339864	0.334006	-8.6213	-2.97849	0.696974	0.719769	0.708372	-10.2615	-3.10925	1.842	1.6451	1.74355
		34	83.9068	-188.403	37.6854	59.976	48.8307	-7.55407	10.6298	1.34781	1.51636	1.43209	-7.8574	8.85484	0.751221	0.768137	0.759679
		35	-28.9518	-14.3349	3.20565	3.63843	3.42204	-20.1795	-12.4884	1.10763	0.972809	1.04022	-19.1082	-10.9344	0.442543	0.421981	0.432262
		36	8.19625	1.43219	0.565049	0.58073	0.57289	-1.59926	3.60412	0.374536	0.336884	0.35571	-3.66402	-0.667432	0.221641	0.21201	0.216826
		37	5.02274	-2.91172	2.44536	2.66191	2.55364	-0.460678	1.01791	1.16746	1.20205	1.18475	-0.0386631	-0.338867	0.509334	0.545089	0.527212
		38	-1.09818	-0.786647	0.595104	0.611361	0.603233	-0.998725	-1.63731	1.37473	1.29723	1.33598	2.57126	8.79315	12.3704	11.8919	12.1311
		39	0.459612	0.072436	0.393322	0.433886	0.413604	-1.72884	0.621889	0.369302	0.407886	0.388594	-8.54968	2.99258	4.57521	4.16398	4.36959
		40	-3.03898	-1.02936	1.43819	1.33748	1.38784	-0.181491	2.84427	0.37146	0.385212	0.378336	-0.0823932	-2.7363	0.33394	0.274427	0.304184
		41	2.21252	3.38388	1.92505	2.34457	2.13481	1.06174	-3.93111	7.87172	8.41589	8.14381	-6.8976	-0.0974723	0.979732	1.00178	0.990756
		42	-0.727722	0.709502	0.442598	0.478685	0.460641	-0.347325	1.02007	0.57697	0.620508	0.598739	0.293547	-1.21298	0.486394	0.506334	0.496364
		43	-14.6786	-29.2081	1.28075	1.44542	1.36309	-6.6235	-14.2996	0.246836	0.280093	0.263465	-3.54025	-7.68343	0.0891321	0.105772	0.0974519
		44	-7.4558	-15.5598	2.61462	2.95366	2.78414	-3.53022	-10.2626	0.679029	0.720411	0.69972	-0.304604	-10.8895	0.812829	0.854195	0.833512
		45	0.896001	18.1714	2.21519	2.99513	2.60516	6.32674	18.6434	0.594822	0.788948	0.691885	9.86992	-145.265	1.62181	2.89454	2.25818
		46	-24.8506	14.0508	1.22732	1.2262	1.22676	-23.7022	12.7558	0.995118	0.948558	0.971838	-27.2665	16.1192	5.92614	5.0246	5.47537
		47	-3.33352	-0.720927	0.194891	0.205857	0.200374	-0.152189	-0.411081	0.0744417	0.076498	0.0754698	2.96631	1.88581	0.252448	0.248367	0.250407
		48	-0.840394	-6.13223	0.691904	0.714787	0.703346	0.140775	-7.83682	0.449914	0.495409	0.472661	-1.28721	-7.42018	1.42521	1.37054	1.39787
		49	-1.07423	-0.534474	0.382596	0.404728	0.393662	2.92403	-1.0431	0.69093	0.683796	0.687363	2.34891	2.97382	3.72061	3.31268	3.51664
		50	-21.2392	13.4335	0.241693	0.201153	0.221423	16.6164	-12.8864	0.333135	0.244058	0.288596	18.4539	-15.1723	1.58997	1.19859	1.39428
		51	12.798	-89.392	1.02286	1.02523	1.02405	3.73145	-35.1081	7.49911	12.4849	9.992	-18.7484	107.105	1.66781	1.99211	1.82996
		52	2.54691	-1.41588	1.46364	1.40627	1.43496	2.23481	0.175266	0.87661	0.912649	0.89463	-3.9723	-4.43805	5.89217	4.61899	5.25558
		53	-0.76092	0.249565	0.880137	0.78384	0.831988	-0.197968	0.408423	0.456427	0.47274	0.464583	1.02933	0.212158	0.321133	0.332998	0.327066
		54	139.778	-49.8977	1.62956	1.57809	1.60383	25.7427	-13.3646	4.26075	2.52069	3.39072	-7.5439	3.87207	0.199044	0.204642	0.201843
		55	0.885714	4.07372	0.358095	0.347153	0.352624	-6.14223	-1.06995	0.467953	0.456402	0.462177	8.4004	-0.75102	0.515661	0.517994	0.516828
		56	-42.9105	4.94585	6.66571	5.63757	6.15164	-35.2993	1.08675	1.12269	0.901934	1.01231	-35.1606	2.72481	0.270742	0.226132	0.248437
		57	-2.83127	-3.04837	2.28207	2.42271	2.35239	-0.587685	-0.536782	0.194068	0.20059	0.197329	-0.426324	0.871466	0.200822	0.204898	0.20286
		58	-1.84306	-4.12339	0.274925	0.282729	0.278827	-2.00268	-3.98111	0.447362	0.476287	0.461825	-5.01598	-1.99304	0.743384	0.784777	0.76408
		59	0.205515	-0.261406	0.43742	0.460517	0.448968	-1.303	0.519484	0.566917	0.562565	0.564741	-2.2335	-1.50259	0.771853	0.774078	0.772965
		60	15.0975	-1.93833	0.198449	0.206064	0.202257	13.4871	-2.64187	1.91729	2.12327	2.02028	14.5042	4.93514	6.46789	6.52329	6.49559
		61	1.68437	3.13028	6.10654	3.99452	5.05053	-0.674235	-0.780426	0.687091	0.778302	0.732696	0.457458	-0.630167	0.281729	0.29525	0.28849
		62	-2.39239	0.542536	0.75254	0.771546	0.762043	-0.354312	0.708355	0.36207	0.383702	0.372886	-0.288551	0.503253	0.770964	0.790406	0.780685
		63	-0.545724	-0.00752606	2.00587	2.3941	2.19998	0.464233	0.764106	0.223755	0.219513	0.221634	0.0105686	0.547302	0.180854	0.176811	0.178832
		64	-0.903699	0.326777	0.089128	0.0902142	0.0896711	-0.721634	-0.0326837	0.104855	0.106604	0.10573	3.84725	-1.23499	0.215264	0.214613	0.214938
		65	10.793	10.1543	5.05845	7.50692	6.28269	1.5073	-2.33695	0.476647	0.467955	0.472301	-1.26532	-3.53615	0.396852	0.380094	0.388473
		66	-0.745871	-10.0697	4.22417	6.60596	5.41507	3.55465	-8.12959	0.323175	0.3746	0.348887	-5.90972	1.67764	1.00428	1.10069	1.05249
		67	2.08391	2.18249	0.614765	0.78016	0.697462	0.63983	1.2852	0.102258	0.124492	0.113375	0.270547	1.17605	0.056501	0.0656209	0.061061
		68	-3.43351	17.4056	0.152938	0.154233	0.153586	-2.1216	14.6996	1.27145	1.16416	1.2178	-3.17983	26.8436	5.25175	2.53055	3.89115
		69	7.07991	4.09512	0.85357	0.813859	0.833714	7.05533	2.06354	0.403518	0.361096	0.382307	10.0957	-1.20999	0.292957	0.29159	0.292274
		70	41.8407	-80.0915	8.29173	12.8315	10.5616	38.0341	-147.335	9.09981	9.67442	9.38711	-2.4598	-60.0728	11.2584	16.3649	13.8117
		71	-11.7509	7.53974	5.54663	4.2095	4.87806	5.16717	-1.3012	0.950005	0.944982	0.947494	3.65825	-0.0372377	0.485128	0.488945	0.487037
		72	0.842928	0.00276506	0.235881	0.243906	0.239893	0.221301	0.224089	0.186165	0.191002	0.188584	-2.99482	0.390462	2.23368	2.52727	2.38047
		73	-3.51251	1.41947	4.64123	7.17235	5.90679	-0.584109	-1.30679	1.12658	1.38509	1.25583	-1.97758	-1.15956	2.0802	3.30044	2.69032
		74	29.5907	-1.70698	0.398624	0.388615	0.39362	24.3455	4.93638	0.916153	0.971327	0.94374	27.0978	-12.879	14.7711	14.7915	14.7813
		75	2.06053	-0.996865	1.39791	1.5862	1.49205	-1.12844	-0.813866	0.348976	0.374038	0.361507	2.64214	4.12856	0.858672	0.830758	0.844715
		76	1.44455	0.40835	0.762566	0.76441	0.763488	-0.553247	-0.275248	1.51877	1.90465	1.71171	2.44506	-3.15055	5.31884	4.86971	5.09427
		77	-0.0541056	6.30668	0.445307	0.494831	0.470069	1.83284	5.26682	1.17349	1.15426	1.16387	0.443397	16.9703	4.1945	4.33302	4.26376
		78	-2.15843	0.715678	1.17243	1.22557	1.199	-0.506805	-5.22183	0.892236	0.910705	0.90147	0.607706	-8.76556	0.253329	0.239187	0.246258
		79	221.898	80.7397	5.7698	5.2294	5.4996	-2.10392	0.990669	0.722858	0.761973	0.742416	-2.89056	2.58748	0.396087	0.440743	0.418415
		80	6.30162	23.8195	0.389783	0.413694	0.401738	6.60902	24.5552	0.931773	1.01677	0.974271	-8.0579	16.7369	0.154992	0.201961	0.178477
		81	2.50504	6.95499	1.72087	2.11587	1.91837	-0.228087	4.49204	0.483151	0.547342	0.515246	-14.8037	3.5433	12.4323	12.7864	12.6093
		82	-4.52096	-2.19699	0.190238	0.207795	0.199017	0.953067	3.7129	0.829897	0.846711	0.838304	-10.3686	-5.20846	3.34816	3.21301	3.28059
		83	5.67113	-0.402467	1.1616	1.15842	1.16001	3.00482	-0.937522	0.261956	0.266489	0.264222	-0.936244	-0.317308	0.199085	0.203945	0.201515
		84	-15.8811	-10.0058	8.02981	9.10451	8.56716	-10.322	-4.4251	7.6942	9.88509	8.78965	-12.5507	-14.526	0.873236	0.990371	0.931804
		85	18.806	8.83352	0.50696	0.510597	0.508778	6.031	3.79243	0.439354	0.396642	0.417998	-2.86361	2.2253	0.454078	0.465032	0.459555
		86	-0.892383	-1.52899	2.54871	2.38602	2.46737	2.45183	0.109809	0.446986	0.445056	0.446021	-0.566216	-0.302755	0.173529	0.178752	0.17614
		87	-11.0882	-31.8687	0.720467	0.761992	0.74123	-11.3533	-30.0076	0.253838	0.304974	0.279406	-10.142	-26.6954	0.760969	0.939524	0.850247
		88	-0.212706	0.467736	0.503252	0.510265	0.506758	0.25372	-0.764173	0.654098	0.70427	0.679184	-1.5166	-0.263295	0.114883	0.114093	0.114488
		89	-41.8634	23.8904	2.368	2.41242	2.39021	-33.4586	11.2602	6.71343	6.27495	6.49419	28.9904	-29.9835	30.0942	34.0227	32.0584
		90	-0.372951	0.436151	0.0807835	0.0846869	0.0827352	0.000528743	-0.14164	0.147311	0.150995	0.149153	1.07027	-1.10582	0.423454	0.435974	0.429714
		91	-0.056457	-19.2127	0.176348	0.219982	0.198165	-2.85052	-9.64441	0.0918308	0.11177	0.101801	-0.891522	-8.33023	0.396235	0.445125	0.42068
		92	-1.82669	8.30758	3.60054	3.8685	3.73452	-1.30579	0.814956	0.595721	0.560587	0.578154	0.00182213	-0.347327	0.352426	0.335287	0.343856
		93	1.6838	0.360927	0.959393	0.835753	0.897573	0.455614	-2.11844	0.846102	0.860913	0.853508	0.295363	-1.05321	0.652308	0.659951	0.65613
		94	-4.00661	-2.34226	2.19479	2.3412	2.268	0.931847	0.630881	0.890664	0.943303	0.916984	2.16898	0.538246	0.910969	0.963529	0.937249
		95	3.55302	1.29327	0.292853	0.310295	0.301574	0.11437	0.613335	0.57184	0.584827	0.578333	-2.95127	3.64534	0.479461	0.517464	0.498463
		96	28.6689	-23.8546	0.424011	0.434987	0.429499	28.1354	-23.5802	0.275576	0.28829	0.281933	41.8201	-24.3345	1.36368	1.40291	1.3833
		97	30.0783	-8.79638	0.397053	0.376368	0.38671	22.2214	5.39014	1.07297	1.01502	1.044	17.1025	10.9802	0.616862	0.589042	0.602952
		98	2.5427	-1.45044	0.795436	0.756406	0.775921	1.36448	1.39335	1.03665	1.06402	1.05033	4.23293	-1.19769	3.62254	3.68333	3.65294
		99	-0.90746	-11.9485	0.579439	0.588986	0.584212	-0.207281	-5.9894	0.721896	0.745645	0.733771	5.29635	11.4028	8.47886	9.63788	9.05837
		100	3.76708	18.0257	3.55235	3.83941	3.69588	10.3695	12.6368	7.33433	7.21831	7.27632	-4.87299	-5.10587	4.22842	4.90227	4.56535
		101	5.55884	-10.1417	2.2821	2.19855	2.24033	1.27499	-2.50671	0.750691	0.815419	0.783055	-3.89696	6.29654	0.163745	0.124388	0.144067
		102	-3.14782	-4.66606	0.462327	0.481429	0.471878	-6.59394	-0.391676	0.29645	0.301141	0.298795	5.00893	3.02599	0.464824	0.469895	0.46736
		103	0.844139	-3.57816	0.50491	0.621037	0.562973	0.991995	-2.12123	0.184604	0.220475	0.202539	28.0621	21.396	3.45494	4.53812	3.99653
		104	16.2961	-13.3087	6.00245	7.74585	6.87415	1.14074	7.36633	0.344073	0.362936	0.353505	3.07651	6.85007	2.04815	2.19057	2.11936
		105	21.5015	13.4988	0.625199	0.621965	0.623582	15.8977	10.5521	0.73542	0.676127	0.705773	6.76684	-9.88587	6.50561	6.59726	6.55143
		106	-19.4418	-7.00119	0.145908	0.134477	0.140193	-19.0604	-7.25615	0.163129	0.150571	0.15685	-19.1978	-7.64512	0.190848	0.177307	0.184078
		107	12.3872	-15.5725	0.288754	0.274674	0.281714	10.4288	-15.2696	0.488356	0.494309	0.491332	10.6665	-18.3995	1.14754	1.17289	1.16021
		108	14.9168	12.6563	1.32639	1.30707	1.31673	-4.36314	-3.84658	0.893781	0.940037	0.916909	-5.20984	-4.69013	0.520009	0.515216	0.517613
		109	111.062	56.4691	1.8551	1.37569	1.6154	-16.1837	-8.06348	0.283355	0.291984	0.287669	-26.0854	-1.42965	9.21127	5.6242	7.41774
		110	-2.78035	0.0460232	1.25492	1.19975	1.22734	-5.46508	3.31179	3.30339	3.77641	3.5399	3.57984	6.68061	0.468104	0.528115	0.49811
		111	4.89053	-0.486352	0.19573	0.186983	0.191357	1.13294	-0.0388619	0.0660767	0.0657161	0.0658964	-0.874237	0.164708	0.0680085	0.0685745	0.0682915
		112	3.84988	13.9609	5.30525	4.32303	4.81414	-1.50322	2.64587	2.67294	2.71582	2.69438	-0.313264	-1.64738	0.855896	0.839834	0.847865
		113	-1.04628	0.27086	0.502982	0.446292	0.474637	2.08675	3.5194	0.264628	0.24971	0.257169	2.0926	3.41305	0.297291	0.273934	0.285613
		114	10.8378	-5.92546	4.12836	4.27838	4.20337	7.06085	1.80155	0.736051	0.689251	0.712651	6.46685	0.508429	0.479605	0.451106	0.465356
		115	-0.0152587	0.715706	0.486706	0.486511	0.486608	-0.164713	-0.453449	0.111551	0.108066	0.109809	-2.31999	-1.40021	0.318439	0.297027	0.307733
		116	4.28727	-3.94716	4.71476	4.71333	4.71404	3.15516	3.20627	0.78928	0.808278	0.798779	-1.12449	-0.108919	0.316513	0.328738	0.322625
		117	3.43204	18.3392	0.844433	0.837484	0.840958	-0.370578	-1.17185	0.32731	0.330358	0.328834	-0.929901	-0.458935	0.245969	0.237354	0.241662
		118	-49.3898	27.2821	0.636772	0.660264	0.648518	-39.8459	25.3271	0.384927	0.384208	0.384567	-39.478	25.7327	0.110062	0.112598	0.11133
		119	37.7103	-25.2762	0.262195	0.244734	0.253465	36.8008	-31.3645	1.887	1.84755	1.86727	13.569	-9.15166	5.09168	4.56384	4.82776
		120	-8.91966	0.337379	0.583824	0.594154	0.588989	0.948283	-0.912651	0.2317	0.232649	0.232175	1.09338	-0.786994	0.117641	0.120424	0.119032
		121	13.3213	5.94621	11.5981	12.3226	11.9603	6.504	-2.67202	0.952786	0.98835	0.970568	1.90677	-1.67233	0.78045	0.768672	0.774561
		122	9.19603	-7.38743	0.668362	0.659326	0.663844	12.0943	-5.77192	1.08899	1.04446	1.06672	6.17862	13.1796	2.45898	1.97879	2.21889
		123	3.1675	-0.323952	1.53856	1.27203	1.4053	2.11873	1.03565	0.324681	0.312674	0.318677	-0.347438	-2.10935	0.742515	0.722706	0.73261
		124	20.2515	-0.86497	1.6152	1.77679	1.69599	16.896	0.651171	0.632224	0.583313	0.607769	10.3244	-0.711453	0.387618	0.326326	0.356972
		125	1.01189	-0.547349	0.0952863	0.0916785	0.0934824	0.252017	1.41027	0.178109	0.147057	0.162583	1.06057	1.40573	1.26926	1.07752	1.17339
		126	0.116098	0.232956	0.0480579	0.0565068	0.0522823	0.354619	0.16728	0.0403016	0.0471569	0.0437292	-1.45333	1.88042	0.0566056	0.0653928	0.0609992
		127	-0.657741	0.758571	0.176076	0.167735	0.171906	1.67407	0.215147	0.194851	0.177783	0.186317	22.5834	5.21262	3.42498	3.53658	3.48078
		128	-199.815	-218.109	24.1034	20.0503	22.0769	1.72665	1.85475	4.50313	3.59961	4.05137	8.63584	-1.93048	0.920198	0.939685	0.929941
		129	0.683932	1.04138	0.46099	0.466408	0.463699	0.0601625	-0.454472	0.0943517	0.0995289	0.0969403	-0.513695	0.27945	0.480461	0.509035	0.494748
		130	6.01642	-0.670547	3.16953	3.02257	3.09605	1.87252	-0.801425	0.589597	0.56369	0.576643	-0.532608	0.319833	0.498934	0.512934	0.505934
		131	80.4319	149.184	3.18663	4.75242	3.96953	24.9166	14.8189	7.98895	12.3231	10.156	-9.54652	-24.2805	0.717725	0.700506	0.709116
		132	7.7255	-2.27049	3.27684	3.18069	3.22877	1.4212	-2.44811	0.48169	0.476984	0.479337	-0.552941	0.324056	0.233319	0.238637	0.235978
		133	-2.37278	-2.52545	3.45864	4.94901	4.20382	0.61112	-0.177234	0.321194	0.306854	0.314024	-0.952348	-0.305601	0.256317	0.240152	0.248235
		134	-6.4624	-9.17776	0.348652	0.356288	0.35247	0.287601	-6.76296	0.849651	0.887789	0.86872	-4.78674	-9.03897	5.28076	6.0134	5.64708
		135	2.32827	-1.81123	0.384988	0.387131	0.38606	0.944423	-3.16429	0.439046	0.461656	0.450351	1.71691	-5.5619	0.813993	0.892456	0.853224
		136	15.8651	-17.9546	9.54281	10.4009	9.97184	27.8588	-18.2495	3.59417	4.04437	3.81927	-161.706	245.02	8.97374	10.2779	9.62582
		137	0.815215	4.55406	8.35764	24.1906	16.2741	0.139212	-0.112308	0.395825	0.410451	0.403138	-0.594242	-0.0283715	0.781303	0.766661	0.773982
		138	-1.54495	10.3381	0.721071	0.797977	0.759524	-1.64546	7.03331	1.10288	1.20364	1.15326	0.498795	6.19302	1.7337	2.01786	1.87578
		139	0.0539276	2.65205	0.808518	0.791833	0.800176	-0.520649	-0.105958	0.562193	0.589348	0.575771	-1.95128	6.09227	6.01029	4.55287	5.28158
		140	5.21813	-1.0021	1.9252	1.78601	1.8556	6.25033	-1.07462	0.568865	0.538836	0.553851	9.01154	-3.78497	1.21603	1.0734	1.14472
		141	-30.212	17.5721	9.46002	9.18814	9.32408	-5.43661	4.58898	2.05131	1.91172	1.98151	-2.98711	1.58314	0.819119	0.831183	0.825151
		142	39.4005	7.54505	12.8039	7.81979	10.3118	43.5274	1.13807	0.492475	0.387169	0.439822	43.4259	2.03092	0.568657	0.482496	0.525576
		143	-3.87626	-6.23985	0.442338	0.480054	0.461196	-6.80425	-6.99636	0.554109	0.554487	0.554298	-8.46294	-8.26042	0.673607	0.667559	0.670583
		144	-4.41198	-1.08925	2.35418	2.53799	2.44609	0.50623	-0.581994	0.258644	0.254107	0.256375	-1.16667	-0.490935	0.303669	0.301974	0.302821
		145	42.0254	-13.7126	1.15145	1.19947	1.17546	35.149	-20.3176	2.23428	1.8002	2.01724	-41.3025	13.3889	2.01356	1.65603	1.83479
		146	-6.61273	-3.45651	0.61525	0.532376	0.573813	-6.61797	-0.608724	0.842201	0.724411	0.783306	-12.2616	2.01639	6.30549	4.94434	5.62491
		147	3.84459	-1.9803	1.92475	1.82923	1.87699	1.48836	-1.46819	0.981748	1.00374	0.992746	-0.361454	0.104149	0.147976	0.144227	0.146102
		148	19.518	-18.4386	0.691671	0.669075	0.680373	13.1182	-14.5916	0.938976	0.909847	0.924411	18.467	-23.6441	0.993675	0.970233	0.981954
		149	3.12916	1.55978	0.47988	0.498483	0.489181	-0.899786	-0.418858	0.24406	0.2588	0.25143	-0.543838	0.556913	0.393187	0.415517	0.404352
		150	0.0455489	-8.38379	0.475848	0.548226	0.512037	-1.90514	-10.9664	1.02684	1.1218	1.07432	-2.7142	-13.0146	2.94412	2.44162	2.69287
		151	-1.59807	33.8563	8.07004	6.47673	7.27338	3.38708	28.0456	0.508082	0.599054	0.553568	3.87424	28.6479	0.315603	0.3513	0.333452
		152	-6.37023	-0.829578	5.69259	3.88858	4.79058	1.98497	4.84549	1.66789	1.60743	1.63766	0.916353	5.52962	0.341364	0.358966	0.350165
		153	1.41346	-5.05677	0.729272	0.753213	0.741243	4.09201	-4.31176	1.79325	1.56952	1.68138	0.389154	4.18014	5.83183	6.81852	6.32517
		154	-0.129014	1.73587	0.108785	0.135249	0.122017	0.117961	0.379567	0.0887729	0.108794	0.0987836	0.451898	-3.1277	0.36149	0.394553	0.378021
		155	-1.59518	-2.78595	0.643429	0.623079	0.633254	0.0989705	-2.6099	0.54744	0.53526	0.54135	-0.0729897	0.30218	0.281145	0.294357	0.287751
		156	1.2967	4.93958	2.77521	2.85597	2.81559	-8.39698	-2.47204	4.99697	4.28706	4.64201	0.634953	-1.25649	0.318156	0.296619	0.307387
		157	-0.691132	0.00942649	0.113829	0.11479	0.11431	0.683527	0.333095	0.131567	0.136884	0.134225	1.48099	-0.613274	0.261991	0.254462	0.258227
		158	6.39932	10.9217	4.46796	4.04304	4.2555	6.35396	5.86973	0.385938	0.466691	0.426314	7.05241	10.3349	0.227742	0.265474	0.246608
		159	2.96191	1.021	1.80346	1.80243	1.80295	-0.263688	-2.77266	0.970921	0.917982	0.944451	-11.8778	11.7948	2.73503	3.23656	2.98579
		160	-1.63388	-2.37442	0.297128	0.341132	0.31913	-0.780982	0.640221	0.1532	0.157762	0.155481	3.21338	1.74105	0.358587	0.372526	0.365557
		161	3.56051	0.210896	0.162195	0.173066	0.16763	1.63107	-0.829484	0.129934	0.129178	0.129556	-1.40911	-3.40457	0.97613	0.881217	0.928674
		162	-1.04397	-0.552409	1.51459	1.63527	1.57493	-0.68451	-0.126427	0.39771	0.449161	0.423436	0.650912	0.161095	0.39331	0.457976	0.425643
		163	0.487915	0.836048	0.320813	0.318554	0.319683	-1.13908	-0.192596	0.269645	0.281737	0.275691	0.272947	-2.04021	0.856722	0.809005	0.832864
		164	3.01022	-7.62493	1.26704	1.3668	1.31692	2.72085	-4.96826	0.72002	0.816372	0.768196	1.26999	-3.37862	0.752528	0.963053	0.857791
		165	-4.53068	8.56349	1.35189	1.15943	1.25566	1.44237	1.88507	3.1192	2.9938	3.0565	-1.29375	0.575229	0.687282	0.610047	0.648664
		166	5.04572	24.5025	1.19984	1.19077	1.1953	-4.87648	-0.656999	1.18708	1.34704	1.26706	-8.90048	-19.4466	0.473831	0.498422	0.486127
		167	-48.7634	1.72017	5.13058	4.59045	4.86052	-34.9678	-4.34642	3.66981	3.76689	3.71835	-30.135	-9.92017	0.592222	0.520982	0.556602
		168	-2.31775	-6.15387	0.738918	0.726422	0.73267	-8.69912	-3.28906	0.501965	0.532185	0.517075	2.04114	-1.00093	0.611071	0.620606	0.615839
		169	-22.1662	20.2203	5.40055	6.73827	6.06941	-14.2274	3.04439	9.91897	14.5107	12.2149	-31.2603	26.8931	0.525605	0.522514	0.52406
		170	-4.21834	3.1497	0.26976	0.274704	0.272232	-0.219737	-1.90165	0.291876	0.295459	0.293667	-5.82533	5.82884	0.702174	0.743108	0.722641
		171	-35.2895	-23.7396	0.24853	0.254016	0.251273	16.8792	13.3478	0.347476	0.310798	0.329137	84.3343	65.5961	0.252654	0.281502	0.267078
		172	-5.28762	1.35148	0.292014	0.310731	0.301372	2.03447	4.20112	0.989254	1.00256	0.995906	9.67198	-3.99657	1.06256	1.37758	1.22007
		173	-0.906628	-8.30746	0.160591	0.171929	0.16626	-2.64239	-2.03706	0.169058	0.177209	0.173134	-2.67926	-0.510864	0.38425	0.40716	0.395705
		174	5.4931	6.99999	0.65282	0.714864	0.683842	-2.04404	4.62965	1.05632	1.11627	1.08629	-1.01772	-2.63029	2.66093	2.67017	2.66555
		175	3.54767	-0.404771	3.58366	3.54581	3.56473	-0.0466407	0.170456	0.339742	0.345222	0.342482	-0.705602	0.201826	0.230211	0.241769	0.23599
		176	-2.36415	5.60522	4.99212	4.07997	4.53605	1.25472	-2.2057	0.960248	1.0384	0.999325	0.980698	-0.402871	0.296608	0.292879	0.294744
		177	-21.6486	-15.5449	3.90612	5.01603	4.46107	-18.2318	-17.7374	0.455932	0.472522	0.464227	-20.2375	-12.7346	0.304892	0.301091	0.302992
		178	-31.8024	-29.4225	2.82635	3.14589	2.98612	-28.869	-32.4222	0.433724	0.446156	0.43994	-30.901	-27.3776	0.297767	0.288909	0.293338
		179	-2.19384	-0.613987	1.62241	2.1341	1.87826	0.0158932	-0.2319	1.13157	1.12264	1.12711	-0.199124	0.642956	0.348963	0.364118	0.35654
		180	-4.03216	-1.5078	0.946547	0.96663	0.956588	-2.56115	2.76867	1.28565	1.24033	1.26299	-13.2414	2.05498	8.1366	10.83	9.48328
		181	-1.20741	19.3165	3.31799	3.44101	3.3795	5.0566	16.3268	2.00618	1.97641	1.99129	4.24878	19.2817	0.183019	0.199918	0.191468
		182	5.55758	-4.67486	2.56727	3.54238	3.05483	-0.423818	-0.597121	0.223514	0.236778	0.230146	-0.246395	-0.608953	0.279616	0.291235	0.285425
		183	-1.51621	5.10011	0.5315	0.529113	0.530307	-15.855	13.6463	0.752523	0.838138	0.79533	-10.3613	14.7235	8.00303	14.2193	11.1112
		184	130.866	40.6124	1.04851	0.473448	0.760979	-18.1909	-2.02278	0.767509	0.434113	0.600811	-27.9712	-7.93434	0.236703	0.220395	0.228549
		185	1.08646	-28.3215	8.6002	11.6393	10.1197	-14.2346	-2.71613	2.28359	2.16928	2.22643	-2.70913	2.11316	2.05544	1.98789	2.02166
		186	-15.2983	-6.17863	5.37636	3.90872	4.64254	-7.59705	-6.39416	0.629934	0.719024	0.674479	-6.34547	-9.74962	0.868302	0.884377	0.87634
		187	-11.6396	2.45034	1.06425	0.888141	0.976195	-5.34202	4.65013	0.923606	0.841059	0.882333	0.861573	3.78473	0.83817	0.804413	0.821291
		188	11.4424	15.1003	2.52069	4.26574	3.39321	22.1086	3.84627	16.5493	4.76295	10.6561	12.2186	8.61788	0.526431	0.496201	0.511316
		189	0.568259	-0.111913	0.307605	0.357763	0.332684	-0.742739	-0.146942	0.22293	0.252327	0.237628	-1.59854	3.67535	1.0288	1.09592	1.06236
		190	-3.78025	1.83596	0.371679	0.397806	0.384743	-0.843952	-0.274614	0.280226	0.252472	0.266349	7.60589	-3.98491	0.284854	0.241079	0.262966
		191	-31.0221	-22.766	6.09301	4.90804	5.50052	-21.1128	-10.098	0.591327	0.552005	0.571666	-17.462	-10.0409	0.629273	0.560203	0.594738
		192	-3.20119	-2.36785	0.459698	0.507392	0.483545	0.690261	-0.765653	0.410594	0.40997	0.410282	2.71004	5.3622	0.487717	0.469593	0.478655
		193	-4.37842	-32.2879	0.555013	0.664332	0.609672	-3.65898	-31.533	0.612818	0.731055	0.671937	-4.19923	-27.1068	0.442364	0.601429	0.521896
		194	-3.49677	-0.0626454	0.311111	0.308556	0.309834	-4.16103	-0.380369	0.252612	0.251462	0.252037	1.25549	3.3861	0.188651	0.170575	0.179613
		195	11.1726	-12.0731	2.30952	2.3087	2.30911	2.41059	-13.9582	0.364945	0.368278	0.366611	3.12464	-11.6601	0.52501	0.562763	0.543887
		196	31.8634	10.8124	0.584803	0.453895	0.519349	16.0501	-5.52022	3.13401	1.23069	2.18235	-277.829	-74.296	11.6711	4.65186	8.16147
		197	7.88213	12.5884	1.1788	1.31825	1.24852	7.80814	12.1655	0.483476	0.523456	0.503466	8.26292	13.5203	0.404136	0.390972	0.397554
		198	-1.78649	-1.23428	1.11451	1.21723	1.16587	-4.11384	-1.87109	0.235749	0.258363	0.247056	1.08805	0.966805	0.257486	0.227278	0.242382
		199	-1.84175	0.117266	0.819406	0.764082	0.791744	-1.32727	1.55017	0.990577	0.993294	0.991936	-0.642528	0.295384	1.70498	1.73075	1.71786
		200	5.1566	-4.80547	0.446848	0.503144	0.474996	3.15529	-3.15252	0.207986	0.237162	0.222574	-4.85553	4.89861	0.212386	0.212363	0.212374
		201	-1.41746	-0.96046	0.207746	0.204129	0.205938	-0.162401	-0.719028	1.35639	1.51258	1.43448	8.38479	2.82504	8.36111	4.29634	6.32872
		202	1.5587	8.93632	2.10317	2.27151	2.18734	2.81538	0.94583	0.835229	0.789692	0.812461	7.13831	7.43926	6.14138	5.21966	5.68052
		203	2.40526	10.0437	3.74398	3.20533	3.47465	-4.93869	3.2928	0.77523	0.708912	0.742071	1.03036	0.33836	0.511747	0.530483	0.521115
		204	-7.35391	-11.5128	7.10728	4.85746	5.98237	-10.0278	-4.57713	2.68863	2.40869	2.54866	-9.25757	-3.36163	0.752093	0.637825	0.694959
		205	-2.62821	-6.62278	5.76443	6.51454	6.13948	3.15044	-3.08585	0.581775	0.642862	0.612319	-2.32898	3.13367	0.585638	0.61752	0.601579
		206	2.09671	-1.93292	0.110978	0.122744	0.116861	-2.34755	3.51125	0.213319	0.229621	0.22147	-10.977	7.15987	0.690566	0.68236	0.686463
		207	-1.6884	16.1619	0.450024	0.551947	0.500986	-3.53892	15.7274	0.550921	0.568814	0.559867	-1.42456	10.6436	7.99245	6.24743	7.11994
		208	-4.77831	-6.15574	2.56833	3.0454	2.80687	0.463014	-0.364159	0.740655	0.766878	0.753766	0.356369	1.17824	0.859294	0.911906	0.8856
		209	-0.34462	-2.40807	0.476822	0.45735	0.467086	2.88173	3.26109	4.93434	4.47105	4.7027	-0.671927	-2.71583	1.66828	1.55668	1.61248
		210	-4.25988	1.77597	1.66181	1.79485	1.72833	-3.04605	1.46308	0.636326	0.628945	0.632636	-2.09929	0.5429	0.673739	0.705513	0.689626
		211	-1.86254	-0.734958	0.675217	0.628608	0.651913	0.415949	-0.934218	0.160862	0.153298	0.15708	0.0836764	0.223028	0.0790555	0.0815351	0.0802953
		212	-0.396987	-0.168223	0.369956	0.384684	0.37732	0.0250711	-5.84201	0.679142	0.69938	0.689261	2.02061	-1.62053	4.10759	5.11066	4.60912
		213	-5.46145	0.511176	0.545625	0.524709	0.535167	-4.07086	-1.99563	0.57304	0.559285	0.566163	0.503763	0.292883	0.156625	0.157976	0.157301
		214	-22.7254	-11.3847	0.201194	0.194941	0.198067	-22.689	-12.0772	0.306132	0.274933	0.290533	-24.7314	-12.2545	2.21252	1.92396	2.06824
		215	-2.01559	11.5235	0.848286	0.914457	0.881371	-0.8304	11.8095	0.537358	0.571354	0.554356	-2.59364	12.4924	1.38089	1.42554	1.40322
		216	3.32827	0.710839	1.85638	2.58885	2.22261	1.01859	-0.943474	0.203177	0.22636	0.214769	4.43484	-1.53014	1.44364	1.29051	1.36707
		217	-0.586081	-23.5328	0.977307	1.582	1.27965	-6.54804	-39.5925	0.6334	1.01112	0.822262	-0.00873828	-47.0079	0.241858	0.276951	0.259404
		218	16.9594	-1.85353	5.14946	6.59879	5.87413	14.3667	-2.48258	1.54345	1.56189	1.55267	13.7149	-3.39532	0.54482	0.466424	0.505622
		219	1.58374	-0.133475	1.50743	1.48118	1.4943	0.781046	0.115016	0.343698	0.36881	0.356254	0.303852	0.10654	0.163534	0.181183	0.172359
		220	-10.5103	9.60881	2.40654	2.40046	2.4035	-10.7237	9.12733	0.638283	0.619004	0.628644	-10.4366	11.0177	1.3144	1.30031	1.30735
		221	34.7349	0.946551	0.651727	0.731561	0.691644	32.7919	1.90086	0.801133	0.703365	0.752249	27.9177	2.10081	0.698234	0.559764	0.628999
		222	12.7752	-5.96244	0.304814	0.23636	0.270587	12.1916	-4.81677	0.156617	0.116405	0.136511	12.3185	-2.60335	0.39619	0.288859	0.342525
		223	-0.902217	0.432765	0.261846	0.284236	0.273041	1.43085	1.35859	0.224595	0.228048	0.226321	-1.7456	1.22285	1.45034	1.43518	1.44276
		224	-24.0588	-3.1341	5.29533	4.21797	4.75665	-11.5812	5.3532	0.940496	0.891355	0.915925	-11.2168	4.65226	0.378352	0.376942	0.377647
		225	-4.41375	-2.57127	0.533046	0.567784	0.550415	-0.698035	-0.389871	0.192807	0.209922	0.201365	0.514103	-0.194091	0.120302	0.125781	0.123042
		226	4.95219	-5.07055	2.23905	1.89968	2.06937	-5.34552	2.17871	0.67681	0.654512	0.665661	-4.86162	4.54784	0.340125	0.387748	0.363937
		227	26.236	-3.6173	0.809673	0.79552	0.802596	27.1766	-2.64154	0.450814	0.435521	0.443167	22.5495	-1.19966	0.581771	0.540741	0.561256
		228	11.8528	4.97895	0.559934	0.606227	0.58308	18.6441	8.19206	3.07428	3.45422	3.26425	4.50422	20.5226	11.6374	12.253	11.9452
		229	-11.3713	-5.44899	0.500726	0.378112	0.439419	-1.4146	1.31401	1.20584	0.961934	1.08389	11.5531	1.08675	0.788203	0.644002	0.716102
		230	15.6499	3.04502	3.68327	2.89612	3.28969	-1.69333	0.832739	0.876345	0.820919	0.848632	-1.09742	-1.39438	0.69922	0.660347	0.679783
		231	9.76444	5.21507	0.442119	0.474283	0.458201	10.9158	5.89541	0.456728	0.465834	0.461281	10.2343	3.96497	0.38714	0.387109	0.387125
		232	-2.21136	8.86254	1.52024	1.51493	1.51758	1.74212	-1.06966	0.601106	0.622553	0.611829	-7.78384	-1.02816	1.943	1.98464	1.96382
		233	0.0808671	0.717657	0.214153	0.214642	0.214398	0.0675715	-0.727097	0.138994	0.13919	0.139092	0.228512	0.363055	0.611867	0.591441	0.601654
		234	0.355795	0.685656	1.42954	1.46694	1.44824	-0.644111	0.176233	0.271131	0.280772	0.275952	-0.315871	0.25475	0.280845	0.293539	0.287192
		235	-21.0177	-9.66989	3.20724	2.99255	3.0999	-25.4436	-6.42101	2.35681	2.07137	2.21409	-24.7026	-6.88222	0.881141	0.760868	0.821005
		236	1.04453	0.0656765	1.08128	1.05537	1.06833	0.222094	-0.144429	0.237039	0.242237	0.239638	2.4805	-0.79943	0.945181	1.02187	0.983524
		237	35.8452	-0.00851417	0.0976009	0.0622632	0.0799321	14.2336	-0.336452	0.601883	0.210333	0.406108	-144.619	-4.93589	11.5394	3.3084	7.42388
		238	2.14604	2.51562	2.11375	2.59927	2.35651	-1.3117	1.18483	0.433644	0.489191	0.461417	-0.31332	-1.11816	0.201893	0.236928	0.219411
		239	6.12918	-1.41864	2.09292	2.24378	2.16835	5.03804	-0.422998	0.379076	0.349991	0.364534	4.98682	-0.468845	0.349007	0.328323	0.338665
		240	-2.20485	-5.65992	0.272677	0.238006	0.255341	-3.33075	-2.31397	1.11607	1.18223	1.14915	-1.37018	6.3802	0.235856	0.260681	0.248269
		241	2.03617	2.476	0.875525	0.781128	0.828327	0.410692	1.39279	0.407435	0.402294	0.404865	-0.965444	0.0410593	0.201931	0.188355	0.195143
		242	18.6673	-4.0665	2.50756	2.48905	2.49831	17.8502	-3.69327	0.986035	0.927923	0.956979	12.4631	-4.38364	1.48862	1.36643	1.42752
		243	7.06206	-44.2754	1.37677	1.46704	1.4219	11.1084	-44.4876	0.505896	0.607191	0.556543	6.23678	-48.3239	0.371502	0.501605	0.436554
		244	6.1569	0.255705	2.41497	2.82479	2.61988	0.240552	-4.24887	4.39898	4.58001	4.4895	0.685842	-0.00588338	0.261159	0.254501	0.25783
		245	39.9992	-25.7708	3.11806	3.68519	3.40163	39.093	-23.0566	0.50164	0.406518	0.454079	41.0143	-23.2101	0.281171	0.251009	0.26609
		246	1.58192	0.24616	2.64491	2.62802	2.63647	0.238329	-0.0210599	0.450433	0.458816	0.454625	-0.340875	-0.239057	0.230932	0.236332	0.233632
		247	0.875569	-0.336313	0.889	0.89302	0.89101	-0.143347	0.501833	0.324068	0.337797	0.330932	0.116567	-0.809002	0.454334	0.469743	0.462038
		248	-11.6454	5.52167	0.3752	0.397438	0.386319	-11.9158	4.63732	0.506813	0.49913	0.502972	-17.6849	11.6231	3.44135	4.19892	3.82014
		249	0.429685	-0.331193	0.384256	0.414224	0.39924	-0.304418	-0.490585	0.153921	0.163213	0.158567	-0.344957	-0.864966	0.195697	0.205667	0.200682
		250	1.97016	1.55584	1.5182	1.309	1.4136	-0.523275	3.53619	2.58072	2.24133	2.41102	-0.484369	-0.776261	0.466102	0.464341	0.465222
		251	10.9642	-9.21779	3.60325	3.98551	3.79438	15.3178	-10.0801	1.58937	1.59697	1.59317	13.7577	-12.2279	0.390284	0.409307	0.399795
		252	-4.97364	-1.75961	0.470503	0.453142	0.461823	-4.37632	-2.86267	0.511625	0.506361	0.508993	-1.69577	2.16485	0.809243	0.805173	0.807208
		253	-8.81569	-5.89904	0.429853	0.398621	0.414237	2.7415	3.94792	4.0149	4.30033	4.15761	13.9743	11.1399	0.725661	0.764056	0.744859
		254	25.5136	-74.5195	23.9826	24.9485	24.4656	9.05599	-27.2706	1.25018	1.39492	1.32255	-0.0453643	-20.6621	4.75926	5.17154	4.9654
		255	-9.31171	-3.3423	4.14286	2.91134	3.5271	-4.24108	-2.72547	1.08822	1.1491	1.11866	-4.24823	-2.24597	0.412546	0.40197	0.407258
		256	1.01202	0.133816	0.862147	0.861686	0.861916	0.253608	0.305158	0.255582	0.248462	0.252022	0.249304	0.325923	0.334025	0.324491	0.329258
		257	3.35458	-0.62973	0.519099	0.572636	0.545867	2.92305	1.76703	0.126315	0.135108	0.130711	3.66139	2.19169	0.104788	0.108121	0.106455
		258	-2.12013	2.09292	0.401068	0.407943	0.404506	1.36013	1.79547	0.873774	0.847786	0.86078	1.00815	-3.05748	0.29909	0.30549	0.30229
		259	-20.912	-22.3526	1.64724	1.77463	1.71093	-23.0619	-21.5453	0.536152	0.519349	0.52775	-23.6705	-23.9689	0.739075	0.805018	0.772047
		260	7.64888	3.19872	4.08052	6.25699	5.16876	0.583966	1.46453	0.467684	0.478268	0.472976	-0.371723	1.3773	0.287038	0.298875	0.292956
		261	-18.4142	-17.5545	0.717932	0.707027	0.71248	-13.491	-20.1762	1.85967	1.48218	1.67092	-25.6426	-20.7567	5.26374	4.9291	5.09642
		262	4.52407	-8.99903	0.828359	1.05114	0.939747	4.25738	-11.4068	0.346942	0.361636	0.354289	2.92333	-10.2446	0.396989	0.405938	0.401463
		263	39.392	42.0939	1.05781	1.21773	1.13777	40.3307	53.4342	1.16276	1.28985	1.22631	0.206786	-2.15893	0.526298	0.994879	0.760589
		264	1.20271	-3.66465	4.08603	3.29595	3.69099	0.11725	-0.0844989	0.20483	0.186971	0.195901	-0.292357	-0.445443	0.161066	0.146734	0.1539
		265	1.84486	1.87666	1.13561	1.04347	1.08954	-0.254043	0.505068	0.309256	0.283105	0.29618	-0.340501	-0.124344	0.121514	0.114923	0.118219
		266	-4.32695	2.9613	1.79088	1.88518	1.83803	-4.12478	15.078	1.65559	1.97859	1.81709	-5.52971	23.734	0.222246	0.249597	0.235921
		267	6.77334	4.82832	0.382078	0.357393	0.369736	7.7518	5.68725	0.383536	0.345063	0.3643	8.06696	7.48705	1.43202	1.46354	1.44778
		268	-1.30999	-0.617985	0.325361	0.313452	0.319407	0.183913	0.407385	0.360677	0.349628	0.355152	1.09743	-0.714513	0.942457	0.918487	0.930472
		269	-5.72014	3.71558	1.13382	1.17435	1.15409	-6.62197	3.91928	0.538551	0.51815	0.52835	-11.0668	5.97423	2.35336	2.01138	2.18237
		270	27.0789	-9.94963	0.298855	0.245585	0.27222	27.5835	-12.1836	0.214007	0.162242	0.188124	27.0982	-12.7529	0.145732	0.111379	0.128556
		271	-4.84736	4.82696	4.28373	5.56948	4.92661	-0.792979	0.986725	0.297123	0.258287	0.277705	-0.365771	0.850238	0.18151	0.159374	0.170442
		272	-2.64276	3.71984	0.311355	0.267266	0.289311	-3.98661	-12.1629	1.1086	1.33754	1.22307	-10.6066	-22.5666	0.573984	0.644111	0.609048
		273	1.48505	0.688353	0.105109	0.101321	0.103215	-0.291365	-1.2632	0.115288	0.104972	0.11013	-0.182269	-1.43819	1.61412	1.23357	1.42384
		274	-0.217735	-1.69537	0.210711	0.194543	0.202627	4.11904	-3.63128	1.37369	2.26403	1.81886	-16.0952	22.7546	2.31065	10.9362	6.62343
		275	-14.8091	-4.11066	1.12472	1.46111	1.29292	-13.7606	-4.33902	0.471069	0.490774	0.480922	-14.7702	-3.76206	0.224648	0.228666	0.226657
		276	-1.55824	0.0276237	1.02392	0.975899	0.99991	-1.27966	-0.0920198	0.40122	0.376862	0.389041	-1.22675	-0.635257	0.538772	0.509136	0.523954
		277	-22.1518	24.2304	0.667952	0.636698	0.652325	-21.4771	24.7334	0.35921	0.330351	0.344781	-23.4301	25.802	1.89109	2.1362	2.01364
		278	0.106813	1.12243	0.375649	0.328042	0.351846	-0.633058	-0.231466	0.193444	0.173411	0.183428	0.208983	-1.41486	0.255778	0.233292	0.244535
		279	-4.95591	1.71928	2.89911	2.49843	2.69877	-4.07636	2.78737	0.329768	0.338091	0.33393	-3.22874	2.67407	0.206418	0.213546	0.209982
		280	1.62751	-0.371776	1.86023	1.79402	1.82713	0.187629	-0.755202	0.28093	0.265849	0.273389	-1.351	-0.134999	0.293565	0.277731	0.285648
		281	5.31691	-15.2257	9.55121	10.6614	10.1063	0.0514638	-5.97526	0.521038	0.451643	0.48634	0.871216	-6.89787	1.2858	1.07021	1.178
		282	-11.6734	81.6674	1.13089	1.18392	1.15741	-1.82989	50.313	5.70607	11.4323	8.5692	10.6918	-104.893	0.797674	1.09501	0.94634
		283	-5.25949	-0.377265	4.96481	5.43383	5.19932	1.14617	-0.566594	0.353039	0.351767	0.352403	-0.425528	0.38368	0.284584	0.281562	0.283073
		284	-15.6231	-12.43	0.341243	0.334359	0.337801	-15.7176	-13.0948	1.26828	1.74972	1.509	-10.0688	-7.00579	0.648301	0.7671	0.7077
		285	-0.63561	0.220098	0.158139	0.162574	0.160357	-0.337273	0.211162	0.263	0.267951	0.265475	0.796222	-1.64674	0.499539	0.538659	0.519099
		286	-2.38703	4.53459	9.84902	10.3878	10.1184	-0.0606245	2.68463	0.697198	0.622909	0.660053	0.0588825	1.78152	0.298445	0.281384	0.289915
		287	-4.8457	2.23649	1.8491	1.90619	1.87765	-2.74967	0.546293	1.37785	1.39853	1.38819	0.306885	7.79846	2.88625	2.8103	2.84827
		288	2.19327	11.6584	0.619773	0.596114	0.607943	1.6217	13.6358	0.803785	0.699151	0.751468	4.298	14.4637	1.26456	1.07771	1.17114
		289	6.0871	-4.67576	3.71463	3.18888	3.45175	7.93614	2.01573	1.04222	0.962106	1.00216	4.95262	1.76861	0.425347	0.399606	0.412477
		290	-0.117171	-0.159063	0.141733	0.143926	0.142829	-0.200193	-0.0374315	0.0711511	0.0723648	0.0717579	0.18963	0.117506	0.0887368	0.0912158	0.0899763
		291	-3.67904	-24.4489	6.0587	8.46308	7.26089	-7.84349	-7.23437	0.845156	0.745339	0.795248	-6.42169	-4.82914	0.562726	0.48228	0.522503
		292	7.43361	4.90708	8.37682	15.2827	11.8298	-5.40345	0.642784	5.15954	4.66506	4.9123	-0.0637024	-0.17101	0.779659	0.765886	0.772773
		293	-5.44978	4.98137	3.77164	4.27	4.02082	-3.20552	0.928238	0.899107	0.925399	0.912253	0.438511	1.78987	0.560657	0.549995	0.555326
		294	3.13106	2.19205	1.07907	0.906275	0.992673	1.06787	2.59199	0.109495	0.106384	0.107939	-11.4863	-13.5325	0.200572	0.204012	0.202292
		295	-1.24994	8.41721	0.473463	0.509769	0.491616	6.22506	8.00318	0.917058	0.935623	0.926341	26.3318	-1.31779	3.939	3.59504	3.76702
		296	-3.25111	-5.75132	3.49734	4.84567	4.1715	0.264717	-0.613864	0.617956	0.593994	0.605975	-1.25386	0.690319	0.350071	0.356222	0.353147
		297	-0.852375	5.3616	3.73529	4.09221	3.91375	-3.89586	2.26236	0.318314	0.326291	0.322303	-3.32504	2.98645	0.437301	0.433756	0.435529
		298	-0.36267	2.55488	1.28487	1.23215	1.25851	0.0613688	0.662548	0.223048	0.216694	0.219871	-0.253506	-0.0157942	0.2456	0.238463	0.242032
		299	-0.203838	0.165544	0.184841	0.182508	0.183674	-0.0336164	-0.257253	0.11795	0.117284	0.117617	0.11375	-0.385016	0.10575	0.103775	0.104763
		300	-43.2243	17.0512	7.80607	8.12211	7.96409	-32.5651	9.53473	1.79207	1.28965	1.54086	-22.1062	1.70731	2.01029	1.41747	1.71388
		301	-3.10628	-2.2027	1.83677	1.76567	1.80122	-0.642303	-0.534093	0.359621	0.387028	0.373325	-0.393393	-0.461504	0.222314	0.23016	0.226237
		302	-8.39332	3.89844	3.14471	3.03377	3.08924	0.367084	0.196966	1.23508	1.31403	1.27456	-0.0952287	-0.450828	0.514992	0.540704	0.527848
		303	0.702576	0.435387	0.260368	0.276606	0.268487	0.261468	1.77924	0.534339	0.588452	0.561396	1.98232	-1.48096	2.86155	3.93495	3.39825
		304	9.7669	-11.796	0.591974	0.625657	0.608816	4.67923	-6.44875	0.277722	0.288855	0.283289	1.04037	-2.67379	0.132673	0.139377	0.136025
		305	-10.6254	1.96174	0.238791	0.232729	0.23576	-9.96165	-0.881011	0.214254	0.207384	0.210819	-11.2767	0.502421	0.330786	0.312474	0.32163
		306	-8.06639	8.89099	1.85532	1.87248	1.8639	-2.15526	7.63001	2.226	2.20796	2.21698	3.4619	-5.76699	2.314	2.2303	2.27215
		307	-0.295001	-0.225162	0.564857	0.548549	0.556703	1.03349	-0.18405	0.792492	0.777041	0.784767	-4.7786	-6.24378	5.53751	5.92717	5.73234
		308	-22.4554	9.65891	2.00237	1.98975	1.99606	-20.3239	8.93183	0.972627	1.03053	1.00158	-23.1227	7.06106	0.612099	0.69123	0.651665
		309	7.41636	-7.90092	5.3681	4.91042	5.13926	2.3353	-10.0484	5.25113	4.76772	5.00943	-12.4247	15.8975	0.879346	0.919501	0.899423
		310	-6.87905	-6.15026	0.229271	0.210835	0.220053	0.222784	-6.37593	5.61577	6.05281	5.83429	2.33766	-0.878665	0.377579	0.470788	0.424184
		311	0.969559	-1.24152	0.444052	0.654424	0.549238	-0.643799	1.00527	0.0998111	0.128182	0.113997	-0.426128	3.00455	0.0915534	0.0980661	0.0948098
		312	-1.03629	-3.94348	0.602377	0.810875	0.706626	-0.525438	-8.86465	0.199609	0.196352	0.197981	-0.329607	-11.9808	1.93958	1.75286	1.84622
		313	-1.7471	-2.69172	5.68919	4.39828	5.04373	0.623824	2.94876	0.560552	0.589495	0.575024	0.0217329	1.93017	0.354772	0.359097	0.356934
		314	4.90708	-4.62178	3.22916	4.17363	3.7014	2.62526	-0.834171	0.857326	0.813618	0.835472	2.61931	-2.09121	0.422932	0.430403	0.426668
		315	13.9564	13.6562	1.28235	1.54455	1.41345	-14.8883	19.2125	0.425991	0.552434	0.489213	-1.71719	5.20503	0.499368	0.730874	0.615121
		316	9.0965	-1.98453	2.98694	5.74713	4.36704	0.417985	-0.183606	0.348709	0.33288	0.340794	-3.22289	-2.3287	1.28823	1.19024	1.23924
		317	-0.925555	-6.97333	0.651294	0.721175	0.686235	-3.17293	-7.38338	1.61876	1.77761	1.69818	-6.82202	-25.7166	8.27756	6.91631	7.59693
		318	36.9737	25.2899	3.19316	2.3761	2.78463	35.6078	25.3312	0.663543	0.676519	0.670031	-210.603	-68.5011	18.3026	10.5166	14.4096
		319	6.24439	6.7295	2.24452	1.95396	2.09924	5.36716	-2.72634	1.36433	1.19323	1.27878	0.385204	1.53908	0.773094	0.817812	0.795453
		320	-14.6945	5.61869	2.01804	2.03306	2.02555	2.04343	4.73919	0.366496	0.288497	0.327496	1.95348	1.27138	0.437479	0.414309	0.425894
		321	-14.2439	4.26104	2.11103	2.09981	2.10542	2.54432	3.41406	0.369636	0.290436	0.330036	2.46557	-0.183632	0.435045	0.427541	0.431293
		322	6.39714	6.39245	2.4969	5.51878	4.00784	14.4861	38.9858	0.792437	0.789248	0.790842	8.34473	17.99	0.295876	0.437203	0.366539
		323	-13.1029	13.8762	0.510729	0.515998	0.513363	-11.7001	14.437	0.305248	0.303887	0.304568	-10.2633	12.8876	0.281124	0.270353	0.275738
		324	-12.8354	11.4274	6.79385	3.3129	5.05337	0.485714	14.6997	0.518789	0.485406	0.502098	-0.686674	13.6465	0.354654	0.523148	0.438901
		325	2.87974	0.256359	2.88239	1.82322	2.3528	-3.89597	2.1598	0.249871	0.237431	0.243651	-13.0805	-6.00038	7.15372	14.9506	11.0521
		326	1.29938	9.74578	1.60291	1.75705	1.67998	1.38379	7.41573	0.526975	0.590331	0.558653	0.671038	9.7323	1.16137	1.36859	1.26498
		327	0.433557	-1.21465	0.56126	0.532135	0.546698	-0.106203	-0.962044	0.599422	0.596663	0.598043	-1.35568	4.38495	2.49645	3.00255	2.7495
		328	0.470534	1.7413	4.49181	4.51202	4.50192	-6.83632	-0.152011	0.4397	0.514334	0.477017	2.60737	-0.741911	0.124444	0.125173	0.124808
		329	0.198302	0.189111	0.256093	0.240291	0.248192	-0.429949	-0.327636	0.12025	0.111685	0.115967	1.56516	0.24618	0.295083	0.298043	0.296563
		330	3.18393	5.7305	1.0985	1.26624	1.18237	5.41265	8.8427	0.546228	0.581785	0.564006	4.35726	3.63224	7.25208	6.87841	7.06524
		331	7.05849	2.23002	0.35499	0.387368	0.371179	0.135078	-0.379995	0.130479	0.136023	0.133251	-0.214942	-0.150587	0.0513443	0.0529543	0.0521493
		332	-5.30233	-3.76482	1.02454	1.18147	1.103	-3.28329	-0.395293	0.531003	0.552939	0.541971	-1.22529	-0.8158	1.17682	1.14397	1.16039
		333	-0.479152	0.144899	0.745042	0.823777	0.78441	0.631715	-0.358162	0.260351	0.277853	0.269102	0.0802108	0.152368	0.242202	0.245037	0.24362
		334	-3.28086	1.89345	1.77704	1.63355	1.70529	-4.18436	-0.204074	0.74598	0.686991	0.716486	-2.5769	0.0142718	0.475048	0.456142	0.465595
		335	17.7174	-0.251185	1.08706	1.08829	1.08768	8.89621	5.75033	3.33078	3.39115	3.36097	-3.5928	1.79586	0.303695	0.37155	0.337622
		336	-6.46864	2.43276	0.516974	0.465551	0.491262	-5.21852	-2.83728	1.56828	1.43981	1.50404	2.11872	-5.57963	0.805747	0.870521	0.838134
		337	-5.35821	-2.78414	1.77226	1.48274	1.6275	2.74555	-1.03925	0.529946	0.586326	0.558136	1.81233	-2.94685	1.40771	1.68595	1.54683
		338	5.7759	5.19192	0.364348	0.388937	0.376643	-3.66704	2.25145	1.0642	1.12397	1.09409	-11.6615	-4.74025	0.358414	0.382801	0.370607
		339	4.91042	-2.88054	0.981778	0.728726	0.855252	-9.162	-8.41253	0.190575	0.191528	0.191052	-5.54597	-6.87929	0.286532	0.295761	0.291146
		340	-7.80018	2.58244	2.30644	1.97332	2.13988	-3.59914	1.57232	0.256692	0.226884	0.241788	5.18717	-2.38632	0.205068	0.194498	0.199783
		341	-1.57354	-4.88257	0.714074	0.897592	0.805833	0.554046	-8.92068	0.338021	0.377694	0.357858	1.93921	-11.6071	1.1085	1.14346	1.12598
		342	1.05523	-0.596441	1.36936	1.35212	1.36074	0.657576	0.0154831	0.179186	0.188481	0.183833	-0.686277	-0.332945	0.255835	0.268721	0.262278
		343	0.431575	0.805293	1.35609	1.26747	1.31178	-2.55791	-0.858764	1.05732	0.941364	0.999341	-1.80776	0.295681	0.184149	0.160272	0.172211
		344	6.91679	-6.98806	0.201311	0.174082	0.187697	8.61222	-9.13172	0.343019	0.303304	0.323162	11.8347	-12.0244	0.597004	0.513786	0.555395
		345	-4.62043	-3.65188	0.65207	0.740322	0.696196	-10.9472	-6.36667	0.955278	1.04576	1.00052	-13.8856	-4.83186	4.35417	5.08328	4.71873
		346	48.4231	176.588	0.84758	1.8794	1.36349	-6.40739	17.2674	1.16382	2.12738	1.6456	28.517	97.6786	0.26281	0.695727	0.479268
		347	2.64797	-0.528109	1.83438	1.31753	1.57595	-0.82106	0.917398	0.850384	0.767838	0.809111	0.771589	0.134917	0.492531	0.49236	0.492446
		348	17.3817	-10.5578	1.90562	1.37851	1.64207	17.8284	-9.95846	3.0311	2.22086	2.62598	16.5563	-7.9079	0.353291	0.341623	0.347457
		349	-26.6702	2.54072	5.69104	4.60042	5.14573	-19.822	5.71024	0.38832	0.373329	0.380825	-20.3425	12.343	1.39067	1.61343	1.50205
		350	-0.806414	-1.36785	0.408885	0.448926	0.428905	1.59485	-1.34717	0.511798	0.542483	0.52714	3.2324	-0.836516	1.09394	1.20701	1.15048
		351	-2.20039	-1.86956	0.360353	0.364774	0.362563	-0.889013	0.293315	0.30905	0.31867	0.31386	-0.469735	-0.124523	0.402369	0.389017	0.395693
		352	-8.97326	-1.65017	0.582389	0.558387	0.570388	-8.15966	2.60164	0.377943	0.398932	0.388438	5.3057	-4.02353	1.04148	1.14888	1.09518
		353	-181.397	-10.6937	0.991808	0.584913	0.788361	-3.0739	-2.16826	5.53635	1.89554	3.71594	71.9831	4.37203	0.466244	0.458487	0.462365
		354	-0.285611	12.3388	0.76681	0.656842	0.711826	2.55408	4.04435	2.70974	2.61502	2.66238	-6.79082	0.849797	2.2321	2.50674	2.36942
		355	-104.239	89.8251	6.88034	6.28107	6.5807	81.7005	-64.9666	1.08546	1.00611	1.04578	85.6922	-67.5906	1.22289	1.2373	1.2301
		356	-0.701334	-0.0857188	0.248597	0.255336	0.251967	-0.278203	0.105824	0.0896781	0.0942407	0.0919594	-0.686754	0.743581	0.180669	0.186265	0.183467
		357	-1.47663	0.585741	1.1203	1.15607	1.13818	-1.05436	-0.11303	0.0927926	0.101639	0.0972159	0.618	-0.40358	0.143162	0.149296	0.146229
		358	-42.693	-0.554937	1.09552	0.645112	0.870318	-43.2174	2.43097	0.831739	0.468566	0.650152	-37.105	2.56825	4.76656	2.60834	3.68745
		359	96.852	-222.858	0.454945	0.523104	0.489025	6.28247	1.35155	0.999486	1.54931	1.2744	-11.2298	25.934	0.296133	0.344916	0.320524
		360	7.30535	-5.02282	10.4799	6.29501	8.38748	-0.660248	-0.428541	0.487779	0.47852	0.48315	-0.766573	0.0916737	0.336359	0.317033	0.326696
		361	5.37233	12.0536	0.666895	0.746429	0.706662	5.85736	10.5299	4.74671	5.79358	5.27014	5.84891	24.8041	5.24512	6.16903	5.70708
		362	-0.86794	-19.1141	0.399591	0.422759	0.411175	-1.19448	-18.3165	0.652752	0.678094	0.665423	-0.0550641	-16.7337	0.704005	0.719109	0.711557
		363	-2.89303	-8.18826	7.84717	6.08407	6.96562	0.702079	0.721009	0.340896	0.392689	0.366792	-5.71913	0.46534	2.20079	2.3262	2.2635
		364	12.8207	-35.2932	0.653379	0.656316	0.654847	12.7473	-35.6351	0.473331	0.457982	0.465657	12.576	-33.8624	0.955378	0.728991	0.842185
		365	2.39471	-10.3522	0.943604	0.959937	0.951771	13.6465	-7.12965	0.969009	0.990038	0.979523	-7.63714	1.11198	0.304621	0.319364	0.311992
		366	-0.455401	0.64641	0.274884	0.292998	0.283941	-2.14474	-0.0210922	0.493044	0.476954	0.484999	-2.98823	1.30419	1.73275	2.50753	2.12014
		367	-5.57745	2.05166	0.126249	0.13202	0.129135	-2.21874	-1.04042	15.9936	7.02091	11.5073	61.91	-32.9406	12.363	8.21523	10.2891
		368	10.1228	-10.8785	0.848364	0.808454	0.828409	8.31955	-8.49591	3.00408	3.30999	3.15704	36.5771	12.4154	57.6605	36.6602	47.1603
		369	0.10543	-0.739668	3.43167	3.52247	3.47707	-0.579464	1.26065	0.651879	0.695155	0.673517	1.01825	0.749779	0.633041	0.663134	0.648088
		370	1.57801	3.44572	0.59078	0.595897	0.593339	-2.76928	3.40236	2.68196	2.8067	2.74433	-2.96389	-6.82112	0.393147	0.403622	0.398384
		371	0.0315418	-16.0276	1.18596	1.37859	1.28228	3.06625	-16.9964	1.53903	1.7198	1.62941	-9.55276	-11.6379	9.75342	11.6286	10.691
		372	-8.49951	12.4941	3.33272	2.63558	2.98415	-10.7193	13.9188	8.82507	13.2823	11.0537	-15.6181	12.0274	2.3766	2.91913	2.64787
		373	-0.81112	-9.96589	1.57346	1.67287	1.62316	-0.370249	-7.2793	0.380484	0.421332	0.400908	14.7493	-6.69896	8.20164	15.7211	11.9614
		374	-17.526	12.2498	1.10351	1.03022	1.06686	-16.802	12.1159	0.573485	0.504903	0.539194	-16.6166	11.5965	0.411679	0.379293	0.395486
		375	-14.6337	6.31542	8.31566	10.2976	9.30662	-8.27586	5.14605	0.989575	1.08875	1.03916	-5.84705	1.82651	0.52072	0.565756	0.543238
		376	-3.60079	1.73625	0.394094	0.419113	0.406603	-7.99504	-7.88323	0.678051	0.658725	0.668388	4.76213	-2.7979	0.381436	0.371283	0.376359
		377	-0.980006	0.933646	0.809581	0.757074	0.783328	-0.779662	-0.104607	0.351362	0.363482	0.357422	-0.420297	-0.35461	0.248745	0.260653	0.254699
		378	2.47492	5.50644	3.18369	2.88606	3.03487	-0.032064	-2.44757	0.445299	0.49211	0.468705	0.814337	0.643345	0.205973	0.201396	0.203685
		379	2.41256	0.930407	7.98514	7.66738	7.82626	-0.0947699	-4.96166	1.43527	1.93959	1.68743	-32.4544	15.2001	8.51249	17.8696	13.191
		380	9.80388	-3.88897	1.24887	1.26502	1.25694	-3.5025	-0.455415	9.2005	9.32225	9.26137	189.756	18.1845	0	0	0
		381	-3.38102	-0.122042	0.722427	0.887908	0.805167	7.63878	2.20909	5.71397	5.93965	5.82681	9.18971	0.87541	0.545753	0.574234	0.559993
		382	-10.4706	13.0322	4.45559	3.65196	4.05377	-7.6603	20.0932	0.749474	0.743039	0.746257	-38.9322	-196.579	2.11087	4.43552	3.27319
		383	1.38926	1.81824	1.18213	1.29506	1.23859	-1.21597	0.997893	1.36468	1.33773	1.3512	-2.07699	-28.9781	12.4336	12.2222	12.3279
		384	4.57328	-1.41828	0.415946	0.371747	0.393846	6.764	0.348651	0.502623	0.483285	0.492954	12.8954	9.03824	1.13868	1.44641	1.29254
		385	0.978907	-5.57716	1.93096	2.10408	2.01752	-1.64644	6.41899	2.19479	2.0323	2.11354	-4.39702	16.199	0.213818	0.286768	0.250293
		386	-1.17428	0.000490363	3.03689	2.89373	2.96531	-0.621651	1.29364	1.07715	1.08089	1.07902	-0.51669	-0.147915	0.293563	0.310704	0.302133
		387	-2.65922	-0.64683	0.542144	0.625372	0.583758	0.236428	0.717882	0.365326	0.410365	0.387846	-0.237943	0.830223	0.240662	0.266583	0.253623
		388	-8.33362	-0.211589	0.846314	0.81928	0.832797	-8.6596	-1.65721	0.275671	0.265914	0.270792	-12.2535	-1.1367	0.333271	0.351746	0.342508
		389	15.5107	3.57876	1.36533	1.47684	1.42108	1.32091	1.87416	0.207345	0.173421	0.190383	-1.21101	1.12501	0.103985	0.0789279	0.0914563
		390	1.72106	-0.800172	0.270514	0.304258	0.287386	1.00356	0.256284	0.365425	0.373604	0.369514	3.15117	0.433842	0.847806	0.806932	0.827369
		391	1.66945	1.74376	1.74141	1.51397	1.62769	-0.461673	1.83809	0.243173	0.256315	0.249744	0.00428557	0.853185	0.210499	0.241761	0.22613
		392	1.46129	-0.0959527	1.39018	1.58235	1.48626	1.01707	-1.59504	0.450788	0.466423	0.458606	-0.356714	-2.61727	0.228331	0.260022	0.244177
		393	-0.573285	-2.19968	0.463877	0.58165	0.522763	3.33777	-14.5534	0.993196	1.28644	1.13982	-1.79183	-13.5186	0.491002	0.694592	0.592797
		394	-0.375619	-13.3945	0.531517	0.690502	0.61101	0.120574	-19.1298	0.549351	0.681196	0.615273	3.55135	-19.4887	3.88146	4.76739	4.32442
		395	0.763454	1.41931	1.0361	1.0674	1.05175	-10.2569	1.94358	1.63069	1.7428	1.68675	-12.6648	3.27981	3.66979	4.07155	3.87067
		396	-1.78049	-0.366567	0.827888	0.888627	0.858258	-0.84202	1.07453	1.29139	1.41997	1.35568	3.71477	-1.43671	11.8854	6.06578	8.97558
		397	1.35838	-1.34095	0.467422	0.56481	0.516116	-0.0142897	-0.511564	0.146616	0.174028	0.160322	-0.435542	0.0699278	0.102023	0.117176	0.109599
		398	-7.70004	-6.33542	0.566432	0.558216	0.562324	-8.08033	-6.31223	0.281411	0.290483	0.285947	-2.76029	1.33573	1.02621	1.02424	1.02523
		399	-2.57549	-15.2211	0.327887	0.28066	0.304274	-2.0243	-3.83207	0.679665	0.717533	0.698599	-1.38926	7.66327	0.239481	0.295057	0.267269
		400	-41.5726	-22.4752	0.266479	0.194776	0.230627	-28.4513	-16.8618	0.641427	0.433048	0.537237	116.36	54.6875	2.83476	2.31445	2.5746
		401	0.607834	-2.66181	1.1299	1.08672	1.10831	0.655561	-0.440679	0.722073	0.744117	0.733095	-0.274877	0.2597	0.311121	0.334137	0.322629
		402	-8.60138	15.2025	0.637876	0.63933	0.638603	-7.48545	14.2719	0.365407	0.353694	0.35955	-7.53371	16.2046	0.473405	0.46546	0.469432
		403	-1.34119	-1.12053	0.115861	0.110067	0.112964	0.217867	1.88144	0.144222	0.144708	0.144465	2.59269	1.95066	0.202053	0.208163	0.205108
		404	-1.58597	-12.9382	0.185177	0.181734	0.183456	6.4261	-9.51749	0.896797	1.26018	1.07849	13.915	-6.81331	0.26234	0.319721	0.29103
		405	3.99578	4.25378	4.10071	3.95358	4.02714	-5.60499	0.802652	1.43341	1.6029	1.51816	-1.57257	-0.855057	1.38238	1.78989	1.58614
		406	-8.92707	10.5035	1.26981	1.3099	1.28986	-9.63144	7.76993	0.337771	0.324604	0.331188	-9.21729	6.39364	0.52373	0.506168	0.514949
		407	6.19296	15.5816	2.8028	3.14398	2.97339	18.8038	30.1532	1.0114	1.09845	1.05492	4.87532	23.9221	6.47886	7.89477	7.18682
		408	-61.5958	18.2459	2.27301	1.19034	1.73167	-68.9612	5.08212	0.634392	0.513217	0.573804	-64.5927	4.59039	2.18228	1.35608	1.76918
		409	1.81688	24.743	5.99068	6.77078	6.38073	0.369797	-1.53267	0.440775	0.497341	0.469058	2.15072	-1.36058	0.71072	0.769264	0.739992
		410	-0.429746	0.310813	0.282798	0.277191	0.279995	-0.0971187	0.988345	0.311753	0.299171	0.305462	0.445611	0.424607	0.865122	0.893401	0.879262
		411	-1.13177	-4.92255	1.93836	1.87131	1.90483	4.05552	-7.88	0.611592	0.606255	0.608923	2.18109	-5.63647	0.492699	0.494991	0.493845
		412	0.72119	-2.5348	2.0565	2.07109	2.0638	0.0445209	-1.06637	0.728723	0.792533	0.760628	0.364998	2.93144	0.692689	0.733306	0.712998
		413	-0.467572	16.6924	0.216859	0.324128	0.270493	0.898789	9.21062	0.265637	0.448962	0.357299	5.7283	-4.35883	1.47745	2.30482	1.89114
		414	-3.15876	-0.723633	1.43887	1.45651	1.44769	-2.34922	-2.55459	1.28042	1.39185	1.33613	-11.7662	-13.7015	6.25719	10.2286	8.24291
		415	8.63455	15.4774	1.50393	1.6425	1.57321	7.88323	12.0855	0.364205	0.391366	0.377786	1.00292	4.44873	1.273	1.42051	1.34675
		416	2.02619	-1.09045	1.28558	1.25952	1.27255	2.9876	-1.28637	0.407036	0.423178	0.415107	-0.658077	0.572991	0.362907	0.370649	0.366778
		417	20.1278	13.5605	3.6447	2.88678	3.26574	19.9973	8.78249	0.496575	0.442515	0.469545	18.1624	8.66435	0.350069	0.307089	0.328579
		418	-9.19403	0.648286	4.04122	4.01031	4.02576	-4.22389	-0.350336	0.994167	0.927046	0.960607	-6.25116	-1.50659	0.588899	0.553187	0.571043
		419	2.27283	7.59119	3.97059	4.44831	4.20945	-7.09225	0.449666	0.616544	0.62922	0.622882	-4.7936	0.894194	1.09561	1.10737	1.10149
		420	2.87895	-6.36322	2.04591	1.88784	1.96687	12.3839	1.40364	0.21616	0.239572	0.227866	4.17035	6.73354	0.305637	0.280905	0.293271
		421	10.9806	1.90577	2.41262	2.27016	2.34139	-2.16167	3.0638	1.83689	1.75452	1.79571	-15.7534	1.21173	0.543378	0.563371	0.553375
		422	2.08511	-3.21414	0.185192	0.19363	0.189411	3.2719	-4.09353	0.382646	0.431646	0.407146	-1.95027	9.76854	0.72253	1.02007	0.871298
		423	11.9144	4.63179	2.63745	8.14022	5.38884	17.9284	-4.74752	1.37132	1.34542	1.35837	17.0047	-4.5459	0.883658	0.787661	0.835659
		424	4.33552	-0.660665	2.81473	2.63417	2.72445	3.65782	0.301654	0.442396	0.443777	0.443086	-0.254979	0.535867	0.254245	0.247171	0.250708
		425	-23.4124	-30.9299	1.91124	2.32021	2.11573	-17.9821	-33.574	0.485885	0.542585	0.514235	-17.4185	-32.6675	0.38431	0.41235	0.39833
		426	0.687068	0.651183	0.594511	0.590538	0.592525	-0.864507	-1.28959	0.848034	0.851923	0.849978	-5.6313	-1.2746	4.03091	3.70309	3.867
		427	19.2638	-35.467	1.80047	2.20406	2.00226	21.9469	-35.2273	0.202621	0.226563	0.214592	20.8654	-33.3175	0.0842905	0.0869743	0.0856324
		428	0.358205	-0.552949	1.36142	1.55164	1.45653	-0.648299	-0.165599	0.496391	0.522028	0.50921	0.345094	-0.810875	0.837065	0.885607	0.861336
		429	-4.59438	15.4386	0.697506	0.82172	0.759613	-5.23839	13.2793	0.425404	0.476645	0.451024	-4.9895	12.2223	0.341627	0.386058	0.363842
		430	1.80009	2.21655	0.268051	0.261336	0.264693	0.645737	0.113276	3.15305	3.12793	3.14049	-2.83046	-2.30087	0.464065	0.458034	0.461049
		431	17.3433	-14.3675	0.8689	0.860336	0.864618	14.3825	-12.8796	0.566659	0.593147	0.579903	13.0543	-12.1532	2.4094	2.48505	2.44723
		432	1.33005	2.27086	0.490034	0.540521	0.515277	0.211421	0.9636	0.0977539	0.105757	0.101756	-0.726816	0.349548	0.144208	0.14888	0.146544
		433	-2.59237	1.01848	5.05258	5.06583	5.05921	-6.02776	-6.42006	0.855477	0.814802	0.835139	-8.51863	-6.36341	0.990909	1.08047	1.03569
		434	-15.8629	2.06967	2.86909	2.69041	2.77975	-11.6109	1.50855	0.484483	0.403252	0.443868	-10.4824	-1.01346	1.16534	0.996483	1.08091
		435	-13.6426	7.46257	0.501526	0.408419	0.454972	-4.98239	2.70698	0.660396	0.694448	0.677422	7.18872	-16.7643	0.305558	0.449716	0.377637
		436	1.51635	3.23749	1.07128	0.992569	1.03192	3.23437	2.30397	1.06066	1.10498	1.08282	-1.02105	-0.10767	0.46435	0.480424	0.472387
		437	10.06	23.9847	0.355234	0.369955	0.362594	-20.3038	17.8018	14.5651	17.4059	15.9855	-18.2224	-23.7826	0.518683	0.465875	0.492279
		438	-3.13993	17.4908	13.3711	16.3047	14.8379	-7.18071	-18.7618	1.20157	1.20645	1.20401	-6.50607	-17.7265	1.2182	1.16617	1.19218
		439	-238.409	-217.293	5.69749	5.49086	5.59417	-49.8055	-44.0557	4.8341	4.64054	4.73732	-2.25789	4.3502	0.232376	0.232606	0.232491
		440	30.4239	-20.8615	0.856782	0.897144	0.876963	30.7765	-20.0888	0.553167	0.543177	0.548172	25.047	-18.759	0.789848	0.801107	0.795478
		441	-286.426	133.34	0.833555	0.635229	0.734392	45.2234	-16.1927	1.91559	1.21518	1.56538	46.357	-21.8681	0.400983	0.44899	0.424986
		442	19.8919	15.4256	1.22744	1.14288	1.18516	11.1713	-11.9849	1.81317	1.75522	1.78419	0.591452	4.17598	3.83807	3.49794	3.668
		443	3.59592	-1.27393	5.19902	4.87497	5.03699	0.417022	-0.116534	0.603859	0.578805	0.591332	-0.997674	0.689458	0.162534	0.162004	0.162269
		444	11.6203	-10.2887	0.468595	0.430623	0.449609	15.4703	-9.96108	1.04196	1.07618	1.05907	17.3086	-3.79605	1.05383	1.33718	1.19551
		445	2.53636	-2.50148	3.01376	2.85767	2.93571	0.774552	-0.570704	1.21005	1.15346	1.18175	1.07851	2.19126	0.407714	0.411376	0.409545
		446	-2.05773	-0.125496	0.353532	0.360797	0.357164	0.422574	-0.183015	0.156358	0.16098	0.158669	0.128522	1.36939	0.244723	0.254356	0.24954
		447	-6.80972	16.399	8.74141	9.24973	8.99557	0.120738	9.07848	0.432418	0.440934	0.436676	0.543615	10.7595	0.212064	0.221403	0.216734
		448	19.6331	-6.18464	5.19711	6.76389	5.9805	0.129071	0.330523	0.440698	0.459892	0.450295	-1.23713	-1.17253	0.354561	0.391497	0.373029
		449	7.27511	9.10815	1.87523	1.76581	1.82052	-6.98104	-16.9226	4.17976	4.4789	4.32933	-23.0524	-12.8484	0.0963322	0.112681	0.104507
		450	-2.76386	6.32636	0.770777	1.03674	0.903756	3.52704	0.0227506	0.535707	0.664126	0.599917	2.63401	0.272092	0.422738	0.495343	0.459041
		451	-26.2539	-13.901	5.41673	5.57517	5.49595	-21.3058	-10.156	1.61702	1.56682	1.59192	-11.7082	-6.49021	0.692179	0.661512	0.676846
		452	-14.7315	-11.9867	0.625513	0.685321	0.655417	-18.8284	-15.9821	0.791739	1.00099	0.896364	-22.6112	-13.6052	1.36055	2.01167	1.68611
		453	-212.234	-8.68873	46.0649	41.2425	43.6537	-10.5027	29.5446	1.58558	1.87859	1.73208	-10.6988	29.1475	0.848975	1.1269	0.987936
		454	34.207	23.299	2.32441	2.31718	2.32079	-31.9257	-31.4979	0.864352	1.12943	0.99689	-32.0565	-27.607	0.192455	0.249342	0.220899
		455	9.66085	1.15293	5.27201	4.76567	5.01884	0.616751	2.91136	1.09372	1.28272	1.18822	0.987335	-0.394838	0.233597	0.268046	0.250821
		456	-17.3869	10.6998	0.325885	0.32214	0.324013	-8.8159	8.49169	0.697349	0.743056	0.720203	3.77138	3.51238	0.446933	0.496532	0.471733
		457	-0.336552	-6.11144	0.677216	0.620173	0.648695	0.338263	-2.94112	0.306292	0.300065	0.303179	3.96755	-3.82995	0.552268	0.556005	0.554137
		458	1.06861	-25.3878	1.34701	1.40373	1.37537	-1.01242	-3.57431	9.16801	13.6429	11.4054	5.47537	12.2224	0.693279	0.857448	0.775364
		459	7.21877	-52.2261	0.359605	0.47539	0.417498	-10.0193	-32.4532	1.56534	5.56002	3.56268	-8.38146	-16.9408	0.573082	1.76316	1.16812
		460	-30.7941	12.452	2.00444	1.53861	1.77153	14.8789	-3.24064	5.13924	4.19481	4.66702	18.4898	-16.5733	0.505498	0.627278	0.566388
		461	18.4665	-9.63589	6.30708	6.98665	6.64687	1.68547	2.49556	1.64361	2.10083	1.87222	0.243005	0.829535	0.462785	0.527148	0.494966
		462	7.06735	16.1757	2.17145	2.69551	2.43348	4.70628	26.4126	0.721778	0.753703	0.73774	2.80091	27.379	1.09421	1.17188	1.13305
		463	-13.5019	-7.82792	0.475711	0.496374	0.486043	-11.291	-5.91283	1.07273	1.03771	1.05522	1.97191	1.9348	0.694293	0.788338	0.741316
		464	6.53072	-20.1232	0.874285	1.0742	0.974242	5.57423	-18.9236	0.729838	0.947904	0.838871	7.17704	-20.1675	1.5535	1.72214	1.63782
		465	5.67738	-0.176509	0.563834	0.542167	0.553	6.67689	-0.223504	0.704177	0.778895	0.741536	-6.32341	2.19449	0.177615	0.195992	0.186803
		466	34.5257	9.03479	4.71482	5.00066	4.85774	33.6327	13.7731	1.14549	1.30187	1.22368	31.4002	12.9809	1.64123	1.84143	1.74133
		467	2.88744	2.31776	1.01697	1.2248	1.12088	1.55294	-0.463951	0.308589	0.347812	0.3282	-0.0944147	-1.46877	0.209246	0.232677	0.220962
		468	-9.35518	4.2595	2.06967	2.62063	2.34515	-1.56026	2.1457	1.87071	2.06292	1.96682	3.91656	-0.298888	0.417041	0.418239	0.41764
		469	1.23994	4.98667	0.437107	0.461562	0.449334	0.0892445	1.52681	0.39932	0.429441	0.414381	0.295532	-3.46341	0.383916	0.398955	0.391436
		470	-0.993013	-6.7028	3.96007	3.61384	3.78695	-0.219807	0.719526	1.24332	1.30801	1.27566	-0.153042	1.81068	0.2846	0.316552	0.300576
		471	196.691	304.608	8.06206	3.28724	5.67465	-4.23762	-49.2971	1.08124	1.07135	1.07629	8.73082	233.274	7.22679	11.7632	9.49498
		472	-2.39599	0.796547	0.264293	0.376119	0.320206	2.34013	8.01609	0.841446	1.1448	0.993122	13.0534	23.6793	0.797173	1.17002	0.983595
		473	15.4247	28.6663	7.49831	5.90662	6.70246	15.3007	14.8874	1.5192	1.61315	1.56617	14.4218	13.5047	0.824171	0.892735	0.858453
		474	-0.135893	1.88957	0.153007	0.162753	0.15788	-0.343593	2.14547	0.128914	0.137672	0.133293	-3.50384	-13.8612	0.243649	0.267906	0.255777
		475	-5.70837	8.63426	4.90728	4.77079	4.83904	-3.13329	5.96158	2.03894	2.41214	2.22554	-5.08427	4.61369	0.546005	0.560602	0.553303
		476	-1.50749	-23.8269	6.53002	5.71653	6.12328	0.828417	-13.2751	0.731781	0.839226	0.785503	1.17566	-11.3956	0.760026	0.924495	0.84226
		477	5.18338	10.9048	0.805759	0.905424	0.855591	10.1733	15.4256	0.591191	0.629848	0.61052	9.45073	12.8025	1.07624	1.18981	1.13303
		478	2.26267	1.59401	3.83121	3.62896	3.73008	-1.73587	-0.951732	0.403215	0.407441	0.405328	-3.03513	-3.36682	0.512554	0.528079	0.520317
		479	17.2146	-10.0643	9.82882	4.90774	7.36828	12.2488	0.590132	0.65547	0.655427	0.655449	12.4768	-0.575317	0.692594	0.701695	0.697145
		480	-0.26968	-1.35466	0.167214	0.185393	0.176303	0.293066	1.74598	0.224899	0.255883	0.240391	0.721124	0.637001	0.496632	0.563445	0.530039
		481	-16.0567	-20.5201	20.5738	11.5581	16.066	1.26393	0.415198	3.07797	2.97423	3.0261	-4.00886	-8.1524	9.58206	7.45675	8.51941
		482	44.635	-334.152	5.94111	11.9306	8.93583	22.4204	31.1912	2.00666	1.94712	1.97689	4.19054	19.8849	2.4507	2.33827	2.39448
		483	-15.1292	2.82196	2.41784	2.26245	2.34015	-9.86853	-0.625284	0.341031	0.361467	0.351249	-16.1032	-0.577211	0.828342	0.824499	0.82642
		484	18.223	-12.8386	10.9363	10.4201	10.6782	6.25288	-8.17285	0.814721	0.771445	0.793083	2.62305	-1.77009	0.277265	0.286565	0.281915
		485	-2.89504	-3.27981	2.02529	1.97763	2.00146	0.149562	-0.481927	0.176253	0.211616	0.193934	-4.15056	-1.76742	0.328047	0.362479	0.345263
		486	0.163029	-0.580444	0.0862798	0.0885324	0.0874061	-1.37849	0.298492	0.114835	0.119375	0.117105	-2.31764	1.11323	0.188196	0.196421	0.192308
		487	17.8505	8.92875	0.329649	0.362749	0.346199	18.2954	10.0684	0.476143	0.546057	0.5111	19.0934	12.8943	0.43663	0.501025	0.468828
		488	1.64472	-1.83975	0.273742	0.301051	0.287396	-3.17725	-1.34386	0.722844	0.791672	0.757258	-6.5314	1.46234	0.652258	0.635541	0.6439
		489	-0.671171	-0.472688	0.296945	0.322535	0.30974	-1.5864	-3.97132	0.416065	0.44021	0.428138	-1.13879	-4.48377	6.3342	5.70892	6.02156
		490	4.02263	2.13315	0.6766	0.599438	0.638019	0.188252	-0.0955777	0.0710534	0.0804759	0.0757647	1.85433	-1.61803	0.339187	0.389839	0.364513
		491	-5.40496	6.59736	5.48224	5.1761	5.32917	-8.46437	-3.28703	0.568973	0.582214	0.575593	45.6096	28.505	11.7353	8.50656	10.1209
		492	0.435373	0.746487	1.31031	1.33739	1.32385	-1.44622	0.549965	0.552018	0.566647	0.559332	-1.30699	-1.09514	0.789904	0.868201	0.829052
		493	-1.61341	4.25745	0.237102	0.254581	0.245842	-0.184123	0.688545	0.0756557	0.0917521	0.0837039	-0.112454	0.758636	0.0577761	0.0708169	0.0642965
		494	2.93051	-11.9283	2.02946	1.7957	1.91258	5.10735	-10.2345	0.913184	1.03622	0.974704	4.09654	-9.8113	0.337974	0.367178	0.352576
		495	2.74707	5.53649	3.40933	3.10986	3.25959	-1.42216	0.981569	0.156638	0.173114	0.164876	11.2056	-1.46883	0.57554	0.671609	0.623575
		496	-12.4738	-13.9725	8.69824	12.4113	10.5548	8.06908	3.51481	1.72726	1.72499	1.72613	5.1543	0.518498	1.08036	1.1492	1.11478
		497	-2.93493	-3.09021	0.828666	0.842826	0.835746	-1.46416	0.643299	0.332439	0.339883	0.336161	1.652	3.27046	0.176452	0.172925	0.174689
		498	-3.79077	-5.21869	0.546469	0.647883	0.597176	-2.70873	-7.28616	1.59065	1.76459	1.67762	-0.525029	-11.2043	0.844048	0.817543	0.830795
		499	2.13948	-1.14314	0.13029	0.18298	0.156635	2.16913	-3.0038	0.0701085	0.0933522	0.0817303	4.63226	-4.581	0.436637	0.508843	0.47274
		500	-5.40901	-9.9874	2.01772	1.88781	1.95276	-11.5836	7.66827	4.72336	5.70371	5.21353	3.90435	1.81686	0.245736	0.273194	0.259465
		501	-3.49548	0.211533	0.317792	0.31075	0.314271	-3.48073	0.501475	0.348465	0.39134	0.369903	-5.26149	1.63203	0.223033	0.238988	0.23101
		502	-0.432403	1.16096	0.611603	0.593003	0.602303	-0.59085	0.481566	0.457291	0.473569	0.46543	0.539525	-0.0610399	0.244106	0.267994	0.25605
		503	-2.64948	1.70082	1.85126	2.09666	1.97396	-0.495907	3.1804	0.756353	0.837936	0.797145	4.54283	-1.74175	1.47219	1.39048	1.43133
		504	-10.7205	21.9864	10.5599	12.1048	11.3323	-0.660076	20.4937	1.94886	1.72397	1.83641	-10.2156	20.0921	0.448863	0.422887	0.435875
		505	-2.94282	-145.228	0.258157	0.781787	0.519972	-9.32101	1.96076	0.23714	0.579226	0.408183	-13.4703	14.8403	0.19006	0.207036	0.198548
		506	6.78446	-0.189168	0.251249	0.221807	0.236528	2.94795	-1.22249	0.615579	0.631944	0.623761	-6.42213	-1.06949	1.21194	1.05304	1.13249
		507	-0.961074	0.834366	0.551303	0.652502	0.601903	0.343442	-0.107739	0.260541	0.278432	0.269487	0.397794	1.1202	0.975625	0.997022	0.986323
		508	-138.592	42.2557	67.9972	101.28	84.6385	12.1062	-14.9913	7.71678	7.7459	7.73134	30.445	-21.0534	1.74955	1.85439	1.80197
		509	-100.178	343.327	7.71309	22.7058	15.2095	-7.66621	48.7592	4.06348	10.5988	7.33112	7.70159	30.4365	0.256783	0.284778	0.27078
		510	-99.3022	328.151	2.58635	6.74748	4.66692	-31.3959	122.588	3.82576	10.0606	6.94318	2.66285	7.46095	0.249395	0.279352	0.264373
		511	8.70147	5.23453	1.69339	1.42607	1.55973	9.12535	5.96939	0.738356	0.698476	0.718416	8.49676	5.74341	1.00063	0.866835	0.933734
		512	11.4571	-9.75439	1.68535	1.35365	1.5195	2.07434	-2.04118	1.19911	0.809781	1.00445	-1.22947	3.48174	0.510616	0.367856	0.439236
		513	-30.3452	6.72473	0.412197	0.373124	0.39266	-31.4677	8.73251	0.433487	0.370635	0.402061	-40.1258	10.0129	9.86292	4.61203	7.23747
		514	-101.334	55.0385	3.61436	4.52167	4.06802	-44.2682	46.1922	9.65759	6.67282	8.16521	-38.2308	43.941	3.37663	2.14878	2.7627
		515	2.67089	-27.6055	0.778286	0.954129	0.866208	3.24918	-27.4128	1.55715	2.05047	1.80381	6.43409	-30.4753	4.12211	6.13188	5.12699
		516	-4.66343	-10.805	0.262945	0.293345	0.278145	0.457182	-1.23294	0.57512	0.599819	0.587469	2.01233	6.11604	0.208254	0.202003	0.205128
		517	-16.5223	13.3774	2.27054	3.04178	2.65616	-16.9564	5.67164	0.86878	0.80342	0.8361	-15.4833	7.7169	0.450781	0.443096	0.446939
		518	-2.56815	-11.4186	0.226721	0.27895	0.252835	4.11867	-1.4843	0.543804	0.58627	0.565037	5.55903	5.35073	0.209167	0.203085	0.206126
		519	3.62561	-7.35785	7.38231	7.29528	7.33879	-0.799389	3.87828	7.70984	7.69719	7.70352	-13.9199	-11.8765	2.76265	2.82074	2.79169
		520	-0.119474	-0.450914	0.143513	0.150405	0.146959	-0.0559782	-0.219317	0.0514218	0.0513777	0.0513997	-1.02281	-0.826471	0.124427	0.129396	0.126911
		521	3.00771	-3.26456	0.364357	0.381093	0.372725	-2.24275	3.76335	2.55178	2.60409	2.57794	-13.2289	9.48042	0.649031	0.668002	0.658516
		522	-1.4963	13.0719	0.584438	0.642011	0.613224	-0.228844	4.65315	1.1853	1.40348	1.29439	-0.306947	-0.57832	0.182697	0.198185	0.190441
		523	-1.11411	-0.0236879	0.292435	0.304049	0.298242	-0.860391	0.785219	0.13022	0.138965	0.134593	0.0303627	-1.01132	0.147997	0.160131	0.154064
		524	18.5191	25.7539	0.135635	0.126586	0.131111	16.8953	25.851	0.187717	0.166568	0.177142	18.6839	23.9333	0.463734	0.457869	0.460802
		525	8.6962	0.335054	1.93202	1.90836	1.92019	6.42377	-1.72548	0.912274	0.83214	0.872207	6.18932	-1.07054	0.482738	0.437431	0.460084
		526	-9.50574	1.56539	1.54981	1.57637	1.56309	-2.55985	-1.31083	1.38762	1.40967	1.39865	6.85221	-2.36166	0.983914	0.938119	0.961016
		527	-0.135501	-0.0159288	0.564358	0.584221	0.574289	1.67796	-0.290947	0.608962	0.645517	0.627239	-0.419299	-4.34705	1.0883	1.14795	1.11813
		528	-11.3694	-8.78438	7.49299	8.51481	8.0039	-2.64255	-6.50783	3.31475	3.75978	3.53727	-2.8563	-1.78789	0.70947	0.695388	0.702429
		529	0.230611	0.0862933	0.553919	0.614184	0.584052	0.120752	-0.0625276	0.151359	0.158778	0.155068	0.0554396	-2.41103	0.289347	0.298065	0.293706
		530	-25.3237	5.9027	1.17764	1.96071	1.56918	-24.8937	6.50625	1.18502	1.04745	1.11623	-24.0594	5.25863	0.399994	0.317754	0.358874
		531	-3.23737	-8.29884	0.43841	0.465984	0.452197	-6.60197	-11.5937	0.315411	0.342941	0.329176	0.914422	1.46443	0.302524	0.384719	0.343621
		532	1.90404	-1.15956	3.12593	2.60482	2.86537	-0.13242	-0.726136	1.02035	0.993995	1.00717	0.0208582	0.1621	0.365901	0.360932	0.363416
		533	3.62763	-15.6974	0.244794	0.279051	0.261922	6.46055	-15.0794	1.7048	2.24247	1.97363	-22.3475	14.3202	9.81819	12.1663	10.9922
		534	3.99946	-3.69527	0.335204	0.313497	0.324351	3.30146	-3.65854	0.171736	0.16101	0.166373	-9.01431	9.60884	0.52427	0.499406	0.511838
		535	1.42271	2.3761	0.785921	0.724485	0.755203	1.69627	1.37392	0.451007	0.467888	0.459447	0.22896	2.46244	0.250129	0.271377	0.260753
		536	-2.44368	13.2089	1.21637	1.37714	1.29676	-0.906899	7.68572	1.11955	1.25967	1.18961	1.02009	-1.46808	0.596513	0.614873	0.605693
		537	221.829	-93.4156	5.26106	2.72909	3.99508	0.652441	-5.05964	0.619945	0.390579	0.505262	-24.3018	10.6812	0.229042	0.228	0.228521
		538	-21.6143	-2.46832	3.86259	3.71099	3.78679	-2.39762	-1.80852	0.617084	0.582124	0.599604	3.92906	-1.41306	0.3587	0.335489	0.347095
		539	23.37	-7.57058	3.25388	2.51003	2.88195	17.6699	-6.13077	1.51458	1.36623	1.4404	16.1919	-5.68703	0.666839	0.596041	0.63144
		540	-1.26763	0.229898	0.471123	0.519644	0.495383	-0.457133	-2.23316	1.46364	1.59345	1.52855	4.42583	1.30588	5.94832	5.65075	5.79953
		541	-0.36916	-2.5919	3.24864	2.63716	2.9429	1.74098	0.0358646	0.411512	0.452717	0.432115	-0.265045	-5.73388	2.95937	2.96787	2.96362
		542	-44.6772	3.94181	0.193346	0.150414	0.17188	-46.233	3.92037	0.456111	0.42577	0.440941	-53.9441	3.89976	0.322242	0.334886	0.328564
		543	12.6688	6.28362	0.46598	0.476648	0.471314	14.9142	9.18315	4.41122	5.19245	4.80183	23.5178	19.054	9.29513	9.25704	9.27608
		544	-2.41696	58.3868	0.550375	0.901715	0.726045	-4.69071	61.7335	0.30082	0.364691	0.332755	-4.58973	60.8761	0.252866	0.310823	0.281844
		545	20.3956	-7.28729	5.36399	6.11473	5.73936	9.53365	-14.3897	5.04799	4.20065	4.62432	11.3656	-10.8635	0.90718	0.930937	0.919058
		546	-0.532077	21.4411	4.70591	7.4981	6.102	-1.01304	11.5701	0.600191	0.57988	0.590035	1.40519	8.93363	0.741752	0.6977	0.719726
		547	20.2109	7.32539	4.91884	6.77409	5.84647	13.2369	11.8554	0.634816	0.649149	0.641982	10.309	12.2251	0.294111	0.309434	0.301773
		548	-0.338759	-6.37429	0.852387	0.898111	0.875249	-6.84162	-3.01294	5.92659	4.45634	5.19147	-0.678787	3.02958	0.613396	0.611727	0.612562
		549	-2.87102	-0.722909	0.627447	0.684333	0.65589	-3.15733	1.50317	0.220908	0.222274	0.221591	0.796047	-7.38904	0.557969	0.584574	0.571271
		550	1.46387	-2.04646	0.973851	0.867262	0.920556	0.970026	0.767402	0.897721	0.776492	0.837106	-1.90279	1.77331	0.949082	0.831922	0.890502
		551	-4.41052	-23.4959	4.57498	4.07513	4.32505	-5.73894	-14.106	0.585196	0.614816	0.600006	-8.61375	-15.1067	0.690597	0.766875	0.728736
		552	1.65558	6.62353	5.79849	4.97591	5.3872	0.598025	-0.144629	0.627402	0.634803	0.631102	1.32009	0.070225	0.747716	0.74119	0.744453
		553	26.3454	17.2932	0.121868	0.118176	0.120022	12.6067	10.5035	0.755459	0.698323	0.726891	-5.00248	0.950686	0.860733	0.763835	0.812284
		554	1.20996	-1.51568	0.354036	0.388112	0.371074	-1.17597	0.0115641	0.359965	0.389358	0.374661	0.20259	1.77133	1.53385	1.45455	1.4942
		555	-2.34597	-0.413033	0.366903	0.377938	0.372421	-0.563277	0.37327	0.256934	0.2745	0.265717	-0.58278	-0.546468	0.441721	0.469753	0.455737
		556	-7.93032	9.72634	0.541614	0.606883	0.574249	-0.636688	3.79352	0.406906	0.487121	0.447013	-3.63479	-2.34154	0.218057	0.292035	0.255046
		557	9.59102	-6.15263	0.918897	1.11617	1.01753	6.46845	-18.2842	2.45957	3.03525	2.74741	5.26183	-23.4811	0.724486	0.671423	0.697955
		558	-1.50433	-0.265033	0.0729025	0.0801846	0.0765435	-0.414918	0.398006	0.0446774	0.0490979	0.0468876	2.02317	-0.974605	0.0612065	0.0644509	0.0628287
		559	-3.50894	-2.5764	0.283723	0.303066	0.293395	11.4377	-1.08665	0.628069	0.597145	0.612607	-4.93902	6.90005	2.11253	2.17736	2.14494
		560	0.767636	-2.39827	0.239019	0.242298	0.240658	-0.394195	1.18343	0.183211	0.183181	0.183196	-2.94473	1.07938	0.383371	0.409972	0.396671
		561	4.62838	3.15675	0.427828	0.463353	0.44559	-0.249606	1.65369	0.139997	0.153149	0.146573	1.41166	0.23769	0.262489	0.28754	0.275015
		562	22.1025	-4.28605	10.7019	10.8761	10.789	27.5631	-6.74167	0.629838	0.662096	0.645967	-201.71	56.9896	4.72506	2.20683	3.46594
		563	-0.0339515	2.06099	3.63859	3.52159	3.58009	0.741291	-1.11329	0.156883	0.16379	0.160337	0.017869	1.14506	0.194751	0.216357	0.205554
		564	-1.29941	3.29825	0.436443	0.470453	0.453448	-1.5006	1.13157	0.221961	0.232516	0.227238	-2.06116	2.52133	0.331903	0.378914	0.355409
		565	0.963145	-0.645148	0.209065	0.212968	0.211017	0.544264	-0.723696	0.775113	0.802902	0.789008	0.762938	5.10132	0.935776	1.00749	0.971635
		566	9.44831	8.76846	1.02705	0.980742	1.00389	-9.38265	-10.5145	2.65001	2.75485	2.70243	-12.0565	-11.3136	0.183114	0.169491	0.176302
		567	-2.67038	-0.534665	0.294433	0.335669	0.315051	-0.222425	-0.546425	0.255408	0.250644	0.253026	0.0754981	-0.28196	0.25731	0.249368	0.253339
		568	0.364852	-0.140561	0.329306	0.323798	0.326552	0.291831	-0.0612927	0.367506	0.379819	0.373662	-0.277593	-0.76049	0.240213	0.227833	0.234023
		569	-4.93744	-8.42144	0.571158	0.629894	0.600526	-8.08226	-8.62359	0.35523	0.374506	0.364868	-7.65729	-3.62504	1.86312	2.25438	2.05875
		570	0.844456	1.80317	1.11032	1.12528	1.1178	-0.842845	0.619902	0.135142	0.138598	0.13687	1.4529	-0.342076	0.221572	0.207135	0.214354
		571	-4.13337	3.17325	0.857271	0.732353	0.794812	-19.3832	18.9491	1.2887	1.34961	1.31915	-28.8417	22.7127	0.541604	0.601374	0.571489
		572	-0.957027	-26.4524	2.39067	1.88363	2.13715	-1.65584	-12.6005	2.36102	2.79333	2.57717	1.72609	2.01114	0.262946	0.269142	0.266044
		573	-0.833297	0.661708	0.174221	0.193981	0.184101	-0.0959743	-0.229173	0.0768822	0.0867982	0.0818402	0.857124	0.616347	0.131324	0.141755	0.13654
		574	-7.34775	-8.78265	0.157183	0.15905	0.158116	-5.88918	-4.79881	0.661609	0.846351	0.75398	12.8423	6.91491	0.411998	0.433295	0.422647
		575	11.9762	-6.74078	4.32254	5.21115	4.76685	3.55072	-0.75325	0.675354	0.736517	0.705935	-0.045107	0.129494	0.229458	0.238118	0.233788
		576	-1.01552	0.14536	0.909403	0.951561	0.930482	-0.970145	-0.320669	0.15363	0.163735	0.158683	1.10791	-0.279002	0.158184	0.167357	0.162771
		577	-0.14271	-6.81203	0.461168	0.401309	0.431239	2.46352	-3.61922	1.68721	1.54041	1.61381	-1.84696	7.49194	0.240868	0.268209	0.254538
		578	12.3052	-81.5235	17.4146	24.0911	20.7529	-2.32064	4.00989	1.8475	2.20803	2.02776	-21.335	37.9967	1.05531	1.0761	1.06571
		579	2.13956	-1.10181	0.345187	0.359751	0.352469	-4.37631	0.633532	0.340107	0.334678	0.337393	-2.86113	0.169067	0.266684	0.269505	0.268095
		580	3.02229	-1.92307	2.49321	2.20644	2.34982	0.318149	0.267736	0.734712	0.723073	0.728893	-0.0964794	0.210809	0.243875	0.242478	0.243177
		581	-7.62693	12.7682	0.115043	0.142119	0.128581	-5.24394	9.35122	0.404903	0.463551	0.434227	7.20842	2.79044	0.784762	0.774905	0.779834
		582	2.50817	4.72116	0.283503	0.281446	0.282474	0.209617	3.15075	0.117489	0.124424	0.120956	1.39668	6.97676	0.423772	0.348628	0.3862
		583	0.839666	-0.146779	0.803132	0.836564	0.819848	-0.192772	0.130879	0.239443	0.266115	0.252779	-3.49132	2.79027	0.355581	0.39971	0.377645
		584	-38.948	-36.7628	0.370785	0.370483	0.370634	-28.5358	-27.8587	1.60855	1.48307	1.54581	138.097	121.32	32.4744	30.817	31.6457
		585	-27.3562	-2.75504	5.1041	4.98768	5.04589	-18.7733	-8.31091	1.5252	1.62997	1.57758	-17.031	-25.3345	0.252814	0.273108	0.262961
		586	-3.61218	12.0909	2.44231	3.35291	2.89761	3.22146	-13.3009	0.8004	1.24775	1.02407	4.25145	-18.8963	0.774675	0.952536	0.863605
		587	22.6314	15.8866	3.5799	3.1245	3.3522	27.4662	6.97163	3.11709	2.85802	2.98755	32.5085	5.16877	2.3737	2.31125	2.34248
		588	-7.69109	-12.6416	1.28146	1.48114	1.3813	-11.7371	-16.4848	1.8844	2.00946	1.94693	-2.64808	-7.57315	0.332151	0.372327	0.352239
		589	-0.0353904	-2.55665	1.35086	1.21322	1.28204	-0.526183	-0.165478	0.31284	0.312597	0.312719	1.27573	-0.772418	0.281542	0.271367	0.276455
		590	-11.033	-22.7837	0.295674	0.339823	0.317748	-2.63605	-3.57422	8.12756	19.5921	13.8598	105.061	342.435	1.92438	4.77868	3.35153
		591	3.06446	2.69523	0.164914	0.166051	0.165483	2.15103	3.24309	0.335344	0.360486	0.347915	2.60175	2.38794	1.04971	1.03074	1.04022
		592	2.52995	-4.02259	1.30163	1.55475	1.42819	-2.87085	9.58083	1.54682	1.70047	1.62364	-2.99758	6.27033	0.642208	0.743288	0.692748
		593	-6.19403	-5.14869	0.332731	0.349025	0.340878	3.74104	-2.42771	0.733774	0.774795	0.754284	3.03508	-5.03005	0.130618	0.132877	0.131747
		594	-5.40404	-10.0478	0.166677	0.183524	0.1751	-13.5425	3.30572	0.966913	2.97908	1.973	-64.7354	283.939	3.7604	10.1655	6.96297
		595	-11.7184	-10.663	0.29157	0.266511	0.27904	-2.40514	-3.72373	3.62444	3.68755	3.65599	-5.47638	12.6096	0.699932	0.753745	0.726838
		596	-1.53786	1.83513	0.479751	0.401277	0.440514	-0.484783	3.32313	0.246985	0.227518	0.237252	0.98287	3.55519	0.0968173	0.0871018	0.0919595
		597	-2.34331	9.45917	0.67258	0.686127	0.679354	2.26853	-6.79587	0.582331	0.601758	0.592044	1.91289	-10.2181	0.375983	0.419246	0.397614
		598	10.4717	-29.0543	0.195514	0.286191	0.240852	5.63599	-32.9643	0.908978	1.03827	0.973625	-7.53037	-19.9553	2.29871	2.69108	2.49489
		599	-1.13681	0.0154384	0.929868	1.73525	1.33256	0.534921	0.0474727	0.360626	0.38551	0.373068	-0.350198	0.287705	0.251063	0.253738	0.2524
		600	2.56403	4.24139	3.38706	3.02352	3.20529	0.263954	1.12268	0.397867	0.418931	0.408399	0.359506	-0.749053	0.244521	0.26255	0.253535
		601	4.74247	-4.32551	3.75495	2.15953	2.95724	1.28172	-3.32021	0.382809	0.36698	0.374895	2.05097	-3.5858	1.68797	1.28182	1.48489
		602	54.1673	8.15525	0.0878235	0.092663	0.0902433	39.7795	-0.130341	0.0953469	0.0888626	0.0921047	43.3219	-1.86335	0.0927878	0.0789679	0.0858778
		603	10.4183	-6.51345	1.03922	0.656345	0.847782	-9.61507	8.165	22.2183	18.7035	20.4609	9.59268	-4.4667	0.350441	0.264284	0.307363
		604	-1.91958	0.473273	0.459929	0.488524	0.474226	-1.02257	1.5763	0.231109	0.247663	0.239386	1.19498	-0.172914	0.645506	0.690226	0.667866
		605	-0.346375	-0.0615724	0.290883	0.298969	0.294926	-0.336755	0.226172	0.350485	0.363478	0.356982	1.31526	-1.10745	1.52489	1.78725	1.65607
		606	-35.7581	61.7839	0.896831	1.13345	1.01514	-17.4608	41.6391	0.356425	0.499938	0.428181	-29.9477	58.2216	1.07329	1.72439	1.39884
		607	-8.44366	20.2674	3.30423	2.95927	3.13175	-1.42913	12.7082	6.11208	3.46146	4.78677	-5.34009	-1.26425	0.86535	0.930026	0.897688
		608	-3.23896	4.36386	0.757672	0.807043	0.782358	5.03937	7.62058	0.540484	0.706004	0.623244	-0.0400302	8.22976	0.326037	0.695502	0.51077
		609	-0.00261571	-0.124906	0.17882	0.177461	0.178141	-0.168861	-1.5828	0.312116	0.307234	0.309675	-0.362031	-0.846705	0.74409	0.74473	0.74441
		610	0.49614	-3.61576	0.107621	0.103486	0.105554	4.43073	0.930047	0.0753994	0.0729537	0.0741766	4.13561	0.317464	0.141536	0.128283	0.134909
		611	-38.7508	-5.87194	0.33745	0.349304	0.343377	-32.5148	-8.72647	1.66273	1.22717	1.44495	-19.881	-4.09205	0.686024	0.494175	0.5901
		612	7.90287	-4.44789	0.921978	0.752737	0.837357	7.29905	-3.28238	1.1881	1.03416	1.11113	-22.8984	-24.49	4.87835	3.92908	4.40372
		613	2.56826	0.0508712	1.2636	1.40723	1.33541	1.11182	-0.371225	0.808486	0.812862	0.810674	-0.847088	1.10274	0.497213	0.498822	0.498018
		614	13.0473	15.9752	8.9564	10.5148	9.73558	6.87167	13.6521	0.654878	0.83312	0.743999	5.27397	13.1997	0.48098	0.587944	0.534462
		615	1.02426	0.60081	0.484016	0.535017	0.509517	-0.155728	0.668345	0.310832	0.31793	0.314381	-1.67941	0.573071	0.444877	0.472164	0.45852
		616	2.61512	2.91251	0.374061	0.436938	0.405499	-0.368151	-0.60994	0.0923593	0.104823	0.0985914	-0.411439	4.33597	0.206174	0.229463	0.217818
		617	2.25454	0.112785	0.150258	0.170073	0.160166	-0.154299	-0.30958	0.0719795	0.079499	0.0757393	-0.959022	0.187582	0.0826786	0.0929484	0.0878135
		618	-0.446983	-0.176192	0.155094	0.152383	0.153739	-0.322423	1.41308	0.208708	0.21244	0.210574	0.489342	1.9782	0.335022	0.343057	0.33904
		619	16.7664	-7.45159	0.176412	0.17862	0.177516	14.5948	-9.05219	0.290371	0.297387	0.293879	9.99191	-7.87428	0.311315	0.316912	0.314113
		620	0.731375	-2.3923	1.18813	1.71887	1.4535	-1.16927	-2.27744	0.339706	0.395154	0.36743	2.87352	-2.78853	0.265859	0.310346	0.288103
		621	-0.277641	-2.68402	0.151394	0.174343	0.162869	0.968515	0.980227	0.1211	0.142874	0.131987	-1.10579	2.18989	0.265097	0.29826	0.281679
		622	10.2272	-5.79257	2.17221	2.45044	2.31133	6.48955	-2.39161	0.717083	0.815619	0.766351	1.15829	-1.40772	0.0689516	0.0740175	0.0714845
		623	18.6816	-31.5822	4.32201	4.32603	4.32402	20.7798	-31.5071	0.483659	0.50457	0.494114	20.5834	-30.6306	0.516135	0.552179	0.534157
		624	9.35722	8.7759	0.411167	0.399243	0.405205	4.33613	5.45915	0.574697	0.571408	0.573052	-10.3161	-8.50105	0.251714	0.247205	0.24946
		625	-0.105698	-0.317646	0.403788	0.391095	0.397441	0.0374397	0.374775	0.441974	0.461455	0.451715	0.370855	-0.0952041	0.338347	0.340743	0.339545
		626	-11.4991	-1.678	0.584492	0.573336	0.578914	-13.0729	14.7316	2.04546	1.81853	1.93199	-11.2069	19.7531	4.99401	3.49749	4.24575
		627	11.8017	7.4997	0.521553	0.540072	0.530812	5.48922	3.30255	0.298234	0.300888	0.299561	-7.77627	-4.25633	0.768173	0.685463	0.726818
		628	-1.84348	-0.394195	0.754143	0.807624	0.780883	-1.93201	-0.546222	0.11959	0.122197	0.120893	2.59681	2.63044	0.322117	0.304078	0.313097
		629	-21.1275	8.68858	1.65581	1.55466	1.60524	-12.1613	-4.80451	0.327518	0.344519	0.336019	13.2114	1.25819	0.334612	0.336036	0.335324
		630	6.92755	-0.993922	3.34834	3.37326	3.3608	-0.712119	-0.00500906	0.15043	0.154132	0.152281	-0.21782	-0.139813	0.181519	0.187666	0.184593
		631	2.17297	-2.73958	0.34938	0.359244	0.354312	-0.00324992	-2.25827	0.549935	0.556537	0.553236	-1.269	-1.72747	0.243783	0.246469	0.245126
		632	-2.34896	0.421108	0.385748	0.375663	0.380706	0.518366	0.0111324	0.28879	0.266507	0.277648	17.9344	-2.19673	2.4723	1.55872	2.01551
		633	-6.32186	8.84332	0.446457	0.464179	0.455318	-6.41846	4.25237	0.302365	0.304386	0.303375	4.00125	-3.94836	1.03435	0.951838	0.993093
		634	-7.82608	-3.34638	0.346612	0.33464	0.340626	3.32537	1.15932	0.797003	0.811215	0.804109	11.518	-0.475542	0.554453	0.59891	0.576681
		635	2.13054	1.00384	0.360146	0.357869	0.359007	1.89631	3.97722	1.28164	1.32021	1.30093	2.16063	6.26322	0.730386	0.70514	0.717763
		636	-52.9225	-186.391	3.9456	9.04222	6.49391	-5.0756	-6.44304	0.111801	0.124999	0.1184	48.0138	-33.8621	0.903584	1.55408	1.22883
		637	-0.0417886	0.0231236	0.131669	0.128872	0.130271	2.66206	1.94058	0.52725	0.536518	0.531884	-8.07159	-5.95024	14.043	11.7142	12.8786
		638	0.164567	-0.112576	0.0882346	0.0873009	0.0877678	1.13956	0.304672	0.098411	0.0943091	0.0963601	1.16281	1.07813	0.467124	0.491831	0.479477
		639	0.0407766	0.315094	0.0643451	0.0656305	0.0649878	-1.72032	-0.931488	0.114521	0.111881	0.113201	-0.239249	-1.64291	0.786045	0.729361	0.757703
		640	11.3574	-10.3572	0.374662	0.385644	0.380153	11.364	-8.65098	0.231981	0.232297	0.232139	10.7643	-9.73564	0.243078	0.253497	0.248288
		641	9.9737	-1.79951	0.230333	0.229418	0.229875	2.94542	-0.993625	0.1698	0.16832	0.16906	-2.02642	-0.832774	0.150779	0.146621	0.1487
		642	0.236312	0.25493	3.72786	3.75834	3.7431	-4.45362	3.82875	0.375839	0.401509	0.388674	-3.78359	1.60794	0.53832	0.526189	0.532254
		643	7.0132	8.52556	0.274773	0.278818	0.276795	-7.8718	-1.17892	0.375037	0.393461	0.384249	-5.8838	-0.150749	0.656697	0.6284	0.642549
		644	-19.0572	28.4843	0.370045	0.362515	0.36628	-0.713189	0.166991	4.39721	7.92278	6.15999	54.3189	-64.1035	0.769578	0.834623	0.8021
		645	0.775121	2.77501	0.465105	0.478786	0.471946	2.23094	2.04306	0.59378	0.595137	0.594459	-0.576443	-1.07638	0.293063	0.304885	0.298974
		646	-0.456781	-0.351858	0.371297	0.407026	0.389161	0.309579	0.73291	0.604312	0.701378	0.652845	-3.22285	-1.24291	0.866537	0.812257	0.839397
		647	-3.96826	-8.45659	0.950196	1.04188	0.996038	-4.16179	12.5286	9.00754	6.47943	7.74349	0.185688	4.93348	1.11227	1.37084	1.24155
		648	-2.65307	0.564753	1.99983	1.44431	1.72207	-4.38088	-0.847668	1.22555	1.20104	1.2133	-4.48938	-1.03149	0.462945	0.466888	0.464916
		649	7.88032	-11.8956	0.15453	0.185285	0.169908	5.60378	-15.5767	15.6232	17.181	16.4021	-32.6409	43.0617	1.28846	1.56136	1.42491
		650	-8.79133	5.6832	0.675448	0.652917	0.664183	0.382086	1.28973	0.182431	0.192008	0.18722	-0.233979	0.945532	0.134916	0.138478	0.136697
		651	16.6209	-2.66551	0.212864	0.197141	0.205003	13.9739	0.613699	0.614222	0.658444	0.636333	2.78862	-19.1252	0.495373	0.475515	0.485444
		652	-1.05612	1.59883	0.403127	0.429226	0.416176	-0.269816	0.46844	0.934854	0.993377	0.964116	-0.130767	-1.82528	0.759413	0.790533	0.774973
		653	3.37969	8.76341	0.861691	0.892492	0.877091	-6.92814	-1.93442	0.191231	0.210606	0.200918	10.2619	2.41084	0.154358	0.158176	0.156267
		654	2.87383	2.00708	0.0546758	0.0581075	0.0563917	1.7778	0.866228	0.0875761	0.0871063	0.0873412	1.71334	0.40941	0.0844411	0.0770479	0.0807445
		655	-11.2474	7.39757	0.669227	0.702895	0.686061	2.34011	1.05175	0.57592	0.65623	0.616075	-20.4295	-3.24916	0.439525	0.44554	0.442533
		656	-12.1518	-13.1312	0.500006	0.549617	0.524811	-4.14735	-9.42579	1.09256	1.19542	1.14399	2.40473	1.04642	0.12446	0.169832	0.147146
		657	9.52783	8.10721	0.199427	0.206866	0.203146	7.43159	7.38668	0.733741	0.756747	0.745244	-6.37424	-2.76643	0.812218	0.921159	0.866688
		658	124.948	44.7307	2.74996	1.3934	2.07168	126.045	43.5363	1.24521	0.634266	0.939739	138.847	44.9033	0.584504	0.665954	0.625229
		659	4.73323	3.63034	4.17556	2.67763	3.42659	-2.57282	0.75225	0.221552	0.199822	0.210687	-0.656897	-0.0123212	0.0889195	0.0762275	0.0825735
		660	7.52916	-1.45262	0.881896	0.869111	0.875503	-1.43041	0.114151	0.266393	0.235196	0.250795	3.15338	-2.54675	0.439969	0.442218	0.441094
		661	2.91934	18.2966	0.833876	0.966158	0.900017	-4.31562	5.59493	0.0788604	0.08946	0.0841602	-2.11219	1.11107	0.0550799	0.0614392	0.0582595
		662	-6.49306	3.51837	0.152687	0.164233	0.15846	0.784698	1.10584	0.203068	0.198105	0.200587	-0.976528	-0.890203	0.350976	0.354661	0.352818
		663	-4.2488	-6.46584	0.164505	0.153776	0.159141	-1.90517	-0.789147	0.109531	0.0981371	0.103834	-14.852	1.52049	0.348494	0.312348	0.330421
		664	-35.9236	-61.1521	2.35212	3.01546	2.68379	40.7436	71.5315	6.78429	7.92237	7.35333	78.1735	114.653	2.90424	3.03199	2.96812
		665	-19.8347	9.27476	0.333594	0.27207	0.302832	2.67427	0.72463	0.654396	0.604382	0.629389	21.4621	-3.90436	0.354823	0.380742	0.367782
		666	-8.98631	0.329713	0.498951	0.470251	0.484601	-0.00414166	0.827161	0.071047	0.074893	0.07297	-0.024824	-1.21373	0.171643	0.171835	0.171739
		667	-0.84469	1.59327	0.221429	0.220458	0.220943	6.37353	1.18136	0.987615	0.902376	0.944996	0.140152	-5.0247	1.08298	1.07496	1.07897
		668	-26.246	-34.7117	0.208081	0.222059	0.21507	3.14971	4.79338	0.52033	0.552305	0.536318	41.5537	48.8216	1.11434	1.28214	1.19824
		669	-2.21647	18.0887	0.372254	0.384998	0.378626	-0.833773	16.9411	0.362494	0.400559	0.381526	3.13486	17.6974	0.354853	0.377762	0.366307
		670	-4.32039	3.56892	1.0751	1.11736	1.09623	4.49083	-4.03513	0.388389	0.384922	0.386655	-2.37975	1.04119	0.317867	0.296576	0.307221
		671	0.43241	1.07914	1.0512	1.12754	1.08937	-4.72418	0.30357	0.287257	0.299718	0.293487	9.81038	-2.30658	0.494888	0.402263	0.448576
		672	-8.41369	-6.89533	0.439462	0.446124	0.442793	-1.27384	-0.721451	1.9174	1.74374	1.83057	5.12371	5.92537	0.377523	0.361663	0.369593
		673	-43.2552	20.1018	0.463968	0.413616	0.438792	-40.3007	18.9841	0.297877	0.236362	0.267119	-32.5727	18.3817	0.54439	0.440629	0.49251
		674	12.3609	15.6261	0.44417	0.489468	0.466819	4.29707	8.04797	0.135058	0.174508	0.154783	-4.82733	5.05328	0.229707	0.335115	0.282411
		675	0.388019	1.67724	0.742885	0.910558	0.826722	-8.1226	-0.632921	0.321521	0.334165	0.327843	-8.99556	-1.09677	0.123367	0.134264	0.128816
		676	3.36986	3.67051	0.414933	0.434228	0.42458	-2.96975	1.83679	0.584845	0.585973	0.585409	-8.45819	5.21784	1.27445	1.21912	1.24678
		677	11.6948	20.0629	0.288979	0.362255	0.325617	2.45815	15.2073	0.126026	0.164834	0.14543	-0.650632	-10.9378	0.697067	0.891064	0.794066
		678	12.9754	5.21264	7.09875	7.05191	7.07533	3.47744	0.0849727	0.273254	0.299682	0.286468	-1.39348	0.584951	0.120508	0.131712	0.12611
		679	9.88089	-4.30337	1.02537	1.01579	1.02058	7.25304	-2.54509	1.08195	1.02636	1.05416	13.5717	6.98638	0.977962	1.01733	0.997646
		680	2.53031	0.243552	1.17137	1.50116	1.33627	0.937582	-1.24314	0.275974	0.318553	0.297263	-0.821688	0.504631	0.205323	0.214297	0.20981
		681	-3.60275	0.736534	0.17821	0.188915	0.183562	1.55637	-0.501865	0.20292	0.171801	0.18736	0.436685	0.0181384	0.189924	0.171104	0.180514
		682	0.2997	-0.353758	0.444866	0.494583	0.469724	-3.26031	1.86011	5.27895	6.32012	5.79953	-6.15761	6.25513	2.07905	2.65048	2.36476
		683	-0.171871	4.18672	0.385504	0.388269	0.386886	0.8446	0.0537322	0.918445	0.854333	0.886389	0.0686199	-5.15816	0.940127	0.901598	0.920863
		684	0.824599	-1.78926	1.35008	1.39873	1.3744	3.34247	-0.232563	0.786011	0.836726	0.811369	2.31041	-0.71069	0.439118	0.493337	0.466228
		685	-2.65799	1.87348	0.686683	0.666919	0.676801	0.639434	0.76977	0.214319	0.221478	0.217899	0.255704	0.359812	0.150984	0.149407	0.150196
		686	-12.9955	-6.44751	0.679762	0.759868	0.719815	-5.94453	-3.54245	0.19557	0.250328	0.222949	0.742125	4.59721	0.245987	0.245611	0.245799
		687	0.0194697	0.359484	0.551163	0.60737	0.579267	-0.0706966	-0.225737	0.12892	0.152908	0.140914	-1.22493	-2.1038	0.271969	0.298441	0.285205
		688	7.49324	11.4834	0.236788	0.237582	0.237185	1.99723	10.3175	0.519445	0.50038	0.509912	36.4605	17.4569	34.038	46.5633	40.3006
		689	1.75434	8.36807	0.199686	0.233235	0.21646	-23.4945	29.4106	4.45708	2.4194	3.43824	-25.7162	32.7352	5.4023	2.97796	4.19013
		690	18.2487	1.63434	5.01983	4.32672	4.67328	24.2307	-2.17046	0.697892	0.597746	0.647819	18.3602	-2.39864	0.640282	0.566272	0.603277
		691	-4.6938	-3.47854	0.247541	0.238404	0.242973	8.76081	4.29029	0.382616	0.338921	0.360769	12.7056	12.6421	1.29062	1.3641	1.32736
		692	6.72439	3.15505	2.62024	2.67949	2.64987	1.27288	1.5289	0.250249	0.278385	0.264317	-0.420409	-0.143525	0.149052	0.157391	0.153221
		693	-8.30058	-1.47613	1.16621	1.2044	1.1853	3.71453	1.9658	1.1959	1.2306	1.21325	-5.53053	1.91147	1.02246	0.944342	0.983403
		694	1.98615	5.76765	0.71895	0.544474	0.631712	-1.07053	3.6833	0.242492	0.257575	0.250034	3.87264	-0.212408	0.0848174	0.104689	0.094753
		695	-0.472347	-1.47421	0.258852	0.241663	0.250258	-0.836329	0.632189	0.454685	0.47172	0.463202	11.4784	4.84804	1.12056	1.11028	1.11542
		696	3.69772	8.89647	0.38824	0.431751	0.409995	-2.76892	0.0427034	3.3278	3.73817	3.53299	-2.96457	-9.07284	0.464992	0.485497	0.475244
		697	13.7928	-3.28056	0.89747	0.908827	0.903148	-2.1526	-6.55776	1.69887	1.47614	1.5875	-20.1211	-15.4411	0.308031	0.471152	0.389592
		698	2.95738	-0.579897	1.88271	1.94304	1.91288	-0.714696	-0.560268	0.361763	0.389186	0.375475	-1.71309	2.5237	0.917609	0.923022	0.920315
		699	-15.3745	9.7071	0.762782	0.625142	0.693962	-6.32257	18.4808	1.90621	1.55958	1.73289	-2.92044	16.2108	0.326901	0.38723	0.357065
		700	49.9286	64.9168	1.43438	2.4286	1.93149	14.9729	-1.55541	0.30407	0.304643	0.304356	16.3032	-4.80895	0.31252	0.23144	0.27198
		701	213.761	-44.535	13.354	9.61043	11.4822	-10.1078	9.66685	14.555	6.72218	10.6386	-20.1727	9.76222	0.579833	0.57879	0.579312
		702	2.08711	1.40708	0.897637	0.898953	0.898295	3.4434	-0.604544	0.0637086	0.0677889	0.0657487	-7.42505	2.30179	0.0609735	0.0621925	0.061583
		703	2.55598	-3.19679	0.74011	0.721898	0.731004	-4.20841	1.73194	1.50335	1.40333	1.45334	-4.08273	0.83608	0.430714	0.464856	0.447785
		704	-1.05366	0.023678	0.122675	0.112154	0.117414	-1.38031	-0.331987	0.111601	0.0995775	0.105589	5.06613	-0.179635	0.137741	0.115363	0.126552
		705	-0.594226	-1.90287	0.331949	0.356216	0.344083	-1.2313	-0.356435	0.279561	0.278482	0.279022	3.82759	2.46591	0.315462	0.300647	0.308054
		706	-10.4618	-18.3163	0.390332	0.399198	0.394765	7.27129	-17.3691	1.2442	1.49425	1.36922	13.27	-21.3552	4.64841	6.24364	5.44602
		707	0.717847	-0.404103	0.440846	0.5615	0.501173	-0.342933	-4.6077	0.755224	1.15601	0.955615	-7.49416	-11.8751	0.418005	0.471611	0.444808
		708	-0.485391	-4.87494	0.558414	0.547626	0.55302	0.243676	1.36242	0.268719	0.281178	0.274949	2.83588	3.68092	1.37149	1.24696	1.30922
		709	7.22911	-1.79584	0.226877	0.22149	0.224183	6.45154	-1.44151	0.130557	0.125114	0.127836	6.19096	-1.57924	0.104018	0.100268	0.102143
		710	2.02499	4.67805	2.04955	2.5278	2.28867	-1.00394	-0.217312	0.199815	0.207217	0.203516	1.02795	2.39327	0.206837	0.22755	0.217193
		711	1.22388	-0.146761	1.57488	1.62639	1.60063	0.460588	-0.232833	1.22694	1.36011	1.29352	-1.01191	-1.94844	1.61463	1.56146	1.58804
		712	-2.71064	0.68652	0.779004	0.877253	0.828129	-6.80048	5.43805	0.157992	0.183609	0.1708	-3.20821	2.33601	0.412706	0.373126	0.392916
		713	3.59168	0.160665	0.84171	0.69339	0.76755	1.71095	2.22433	0.213114	0.191607	0.20236	4.75822	0.151692	0.49123	0.368473	0.429851
		714	5.04822	-3.3603	10.8512	25.5972	18.2242	-0.464061	-0.447385	0.142762	0.153981	0.148372	0.310304	-2.00581	0.124743	0.136813	0.130778
		715	37.6719	-7.00068	1.21029	1.25346	1.23187	38.9589	-6.04372	1.38703	1.50468	1.44585	39.629	-3.53875	1.61422	1.8029	1.70856
		716	-3.83762	-0.36738	0.352867	0.338365	0.345616	-2.90106	-1.02914	0.274269	0.271155	0.272712	-1.77331	0.531652	0.219098	0.198761	0.20893
		717	-4.58056	3.29083	0.31777	0.300136	0.308953	0.308827	1.17112	0.419559	0.427198	0.423378	1.22093	-1.15525	0.202146	0.208891	0.205519
		718	1.14341	2.82389	0.282388	0.288964	0.285676	0.620336	1.35778	1.10681	1.04672	1.07676	0.727702	1.49378	0.338726	0.335274	0.337
		719	0.229711	6.68354	0.0541531	0.0675824	0.0608677	-1.3922	4.32558	0.287003	0.332166	0.309585	-4.98627	-3.67797	0.192443	0.238611	0.215527
		720	-0.00946393	0.684437	0.134274	0.148209	0.141241	-0.199461	0.373964	0.12207	0.135341	0.128705	-0.475425	-1.20172	0.157502	0.174348	0.165925
		721	-20.0703	3.73472	0.117289	0.124867	0.121078	198.994	-5.8793	5.59121	1.48951	3.54036	282.989	-1.00118	0.755727	0.485821	0.620774
		722	1.18043	-0.999795	0.553927	0.54534	0.549633	-0.408986	-0.499441	0.194623	0.185186	0.189905	-0.65127	-0.996748	0.125129	0.118377	0.121753
		723	-5.19598	-3.12525	0.346234	0.365935	0.356085	-2.58583	-1.8711	0.226714	0.245656	0.236185	0.430124	-0.0988389	0.0669993	0.0743413	0.0706703
		724	2.27518	3.49897	0.799535	0.786349	0.792942	-0.247018	0.382019	0.406026	0.425938	0.415982	0.639659	-0.94026	0.540751	0.556356	0.548553
		725	0.428156	-2.67337	0.353235	0.365431	0.359333	-0.0981357	-0.671266	0.344252	0.359633	0.351942	0.450154	-0.70074	0.241137	0.24558	0.243358
		726	264.615	329.313	2.73048	3.32191	3.0262	-5.62006	-19.825	0.818926	0.975685	0.897305	-27.8204	-24.2394	0.242457	0.268144	0.255301
		727	-8.21647	-2.6798	0.940486	0.956756	0.948621	-8.75325	-4.84662	0.278159	0.275069	0.276614	4.82156	1.27165	0.330353	0.332031	0.331192
		728	-15.324	12.039	0.400543	0.373531	0.387037	18.2225	-12.3699	1.45654	1.50447	1.48051	22.1034	-15.4265	1.8932	1.98511	1.93916
		729	13.5902	3.48543	1.0557	1.12047	1.08808	-1.70682	3.13327	0.57532	0.583759	0.579539	-0.779823	-0.773908	0.253855	0.260134	0.256994
		730	4.51388	5.46616	1.42182	1.18579	1.30381	-0.2144	-4.2758	0.938131	1.10888	1.0235	-1.77012	-2.07598	0.119114	0.125296	0.122205
		731	-0.299052	0.368451	0.0651173	0.0675531	0.0663352	-0.0872623	0.0122613	0.0482936	0.0489072	0.0486004	0.116403	0.0676603	0.0832751	0.0824194	0.0828472
		732	0.0690651	0.396307	0.115903	0.120824	0.118364	-0.280353	-0.436167	0.151979	0.158156	0.155068	0.801755	-0.990766	0.78002	0.768045	0.774032
		733	-0.592759	0.376074	0.167799	0.162929	0.165364	0.152825	-0.00800239	0.12955	0.124298	0.126924	0.193604	-0.23267	0.181788	0.172696	0.177242
		734	-195.921	-333.773	12.7831	20.1425	16.4628	-6.68999	-0.927773	17.0025	19.4863	18.2444	7.81138	6.19494	1.28431	1.36858	1.32645
		735	-8.40066	-16.6079	3.91372	3.76308	3.8384	-6.59516	-25.5517	2.50471	3.44662	2.97566	-5.26048	-24.6952	0.782846	0.921112	0.851979
		736	-2.36529	0.32901	3.64911	2.75296	3.20103	-0.182805	1.03543	0.474487	0.44715	0.460818	0.126815	0.207119	0.15101	0.152441	0.151725
		737	-13.2215	10.33	0.624923	0.604166	0.614544	-13.0748	9.05519	0.684231	0.711063	0.697647	-8.71393	-0.588352	3.49143	3.35747	3.42445
		738	20.4755	-23.9092	0.632411	0.59359	0.613	14.2264	-1.20412	1.22183	1.05578	1.13881	19.5828	-6.18655	1.51907	1.38086	1.44997
		739	18.8554	3.70327	0.402795	0.401696	0.402245	13.7664	7.62425	0.720679	0.67305	0.696865	-27.0923	-17.4362	10.7503	8.6913	9.72082
		740	-6.82575	1.77638	4.57503	3.98949	4.28226	-0.534251	-0.276053	0.43882	0.408361	0.423591	1.60892	-0.518675	0.926027	0.907219	0.916623
		741	23.725	-16.0878	0.40422	0.40294	0.40358	16.968	-21.2086	3.55318	3.43383	3.4935	14.3191	-16.8389	6.77502	6.44817	6.61159
		742	5.74282	-2.49788	0.232177	0.200956	0.216566	6.27203	-1.2281	1.04706	0.644256	0.845658	-3.11596	4.68962	4.58257	2.51061	3.54659
		743	0.636109	-0.313029	0.259114	0.22625	0.242682	-13.1221	8.84873	3.81036	2.73619	3.27328	-23.8306	24.7926	3.02053	2.48791	2.75422
		744	-0.233196	-4.73431	0.323262	0.292212	0.307737	3.03636	-3.76941	0.421184	0.518204	0.469694	3.05173	-3.19474	0.357425	0.374259	0.365842
		745	-0.772884	-0.171351	0.198861	0.192981	0.195921	0.151184	-0.041277	0.081919	0.0832901	0.0826045	0.251773	-1.07495	0.2077	0.208955	0.208328
		746	-41.5632	-131.457	0.575319	0.661254	0.618286	-19.6306	-83.3876	1.24173	3.1052	2.17347	17.077	57.7166	0.158728	0.213144	0.185936
		747	1.13313	-0.153348	0.930803	0.874298	0.90255	-0.281385	-0.251056	0.22755	0.22065	0.2241	0.30851	0.647457	0.57566	0.535823	0.555741
		748	0.714324	1.03412	0.124628	0.13414	0.129384	0.466104	0.749767	0.158376	0.157617	0.157996	0.193198	0.147677	0.129625	0.119479	0.124552
		749	1.42468	4.65343	0.394945	0.371402	0.383174	3.04909	2.9005	1.38781	1.35642	1.37211	7.83074	0.0371068	10.896	9.37914	10.1376
		750	1.57871	-0.889027	1.01093	0.898345	0.954639	-1.76742	-3.06984	0.82695	0.936465	0.881708	0.897352	-1.92018	0.495098	0.504501	0.499799
		751	-1.08241	-2.60821	0.961292	0.935444	0.948368	-1.74043	-3.51017	0.195479	0.20769	0.201585	-1.84208	-3.27552	0.157297	0.163143	0.16022
		752	1.89411	-0.708068	0.17375	0.174629	0.17419	-1.46163	0.154828	0.12273	0.125759	0.124245	-10.9156	2.19388	0.447023	0.395441	0.421232
		753	-8.88864	-13.1737	0.320644	0.334396	0.32752	-7.0214	-12.4517	0.264111	0.251955	0.258033	-0.154693	-3.87661	0.392181	0.378467	0.385324
		754	-14.8521	-31.1355	0.427331	0.478252	0.452792	-20.1163	-32.3684	0.933981	1.01982	0.976901	-22.9509	-32.8754	0.808878	1.06998	0.939432
		755	-3.45022	-3.32349	0.210816	0.198031	0.204423	4.12233	2.72775	0.468088	0.465503	0.466795	6.86256	13.0625	0.588542	0.619557	0.604049
		756	-27.8555	67.2344	53.9368	21.2684	37.6026	8.36334	27.8966	0.370474	0.660965	0.515719	-66.4208	-245.71	1.2969	2.1023	1.6996
		757	-3.79657	4.0983	0.217215	0.183906	0.200561	-1.65104	-8.60071	0.653492	0.728928	0.69121	-3.30829	-14.0461	0.547607	0.508226	0.527916
		758	-6.19147	-7.48151	0.464165	0.501687	0.482926	-8.01313	-8.33239	0.093051	0.099296	0.0961735	-3.10679	-1.10115	0.197778	0.20198	0.199879
		759	-2.03148	-1.97826	0.309145	0.277628	0.293387	-1.41015	-1.30448	0.190774	0.171776	0.181275	-1.68532	1.11628	0.28393	0.253908	0.268919
		760	0.0108351	-10.6631	7.45918	6.94044	7.19981	-4.10594	0.764138	1.24448	1.14187	1.19318	0.54072	-0.495108	0.88405	0.823147	0.853599
		761	135.001	-85.0106	3.45311	2.5092	2.98116	-0.23803	-30.248	1.92974	1.52162	1.72568	-20.6405	-17.0181	0.425001	0.370537	0.397769
		762	8.86875	-8.58109	0.538191	0.535267	0.536729	0.628679	-9.3329	0.337271	0.351823	0.344547	-4.35274	3.72702	0.351683	0.37226	0.361972
		763	-5.62132	-8.73322	4.80954	4.83339	4.82146	-0.316771	-0.596258	0.567284	0.526859	0.547072	-0.0967549	2.49613	0.462405	0.443549	0.452977
		764	0.0348048	-3.42211	0.898216	0.94004	0.919128	-0.0579847	0.405658	0.32965	0.33588	0.332765	-0.873499	0.978243	0.533655	0.55441	0.544032
		765	2.28715	0.855053	0.420877	0.405936	0.413406	-3.99824	1.1553	0.21394	0.201118	0.207529	3.7917	-2.54696	0.244987	0.245159	0.245073
		766	-3.03532	-1.84749	0.304111	0.29967	0.30189	-1.0255	-1.03589	0.128975	0.123757	0.126366	6.13466	10.9939	0.468408	0.481562	0.474985
		767	-0.889668	1.03124	1.371	1.24569	1.30834	0.991753	0.490171	0.703504	0.618069	0.660786	0.319264	-0.0709922	0.134539	0.126648	0.130593
		768	16.2449	-8.20129	0.645341	0.618875	0.632108	16.9447	0.611993	3.86396	3.62106	3.74251	11.7096	1.3143	10.5478	6.59336	8.57058
		769	0.262717	0.380999	0.175267	0.184248	0.179758	-0.216078	-0.00322708	0.183657	0.184807	0.184232	-0.912063	-1.18647	0.195005	0.19097	0.192987
		770	1.97639	2.38671	0.991618	1.05223	1.02192	1.12701	1.74179	0.426315	0.438745	0.43253	-0.0397464	-0.279222	0.412213	0.414159	0.413186
		771	134.632	-2.74721	0.535553	0.499465	0.517509	103.504	36.3219	1.83671	1.86209	1.8494	60.7797	74.6031	0.719011	0.712177	0.715594
		772	0.189591	0.579254	0.070999	0.0707177	0.0708583	-0.506912	-7.56	1.19779	1.30201	1.2499	-6.23804	-18.9056	0.546328	0.537591	0.541959
		773	0.099565	4.51188	0.243108	0.2317	0.237404	-5.70586	-5.69623	0.228237	0.23521	0.231724	-10.2013	-9.18066	0.27209	0.280693	0.276391
		774	-27.2158	-12.6148	0.234362	0.194119	0.214241	-19.7791	-13.59	0.718012	0.455121	0.586567	-12.4684	-10.1543	0.353927	0.45695	0.405438
		775	0.0626631	1.63099	0.6779	0.718037	0.697969	-0.0136693	0.97271	0.139062	0.127681	0.133372	-1.91223	1.85127	1.43486	1.31904	1.37695
		776	1.43791	-1.00511	0.521868	0.561276	0.541572	-0.396346	0.135426	0.18643	0.209051	0.19774	-2.83674	2.02586	0.168281	0.173239	0.17076
		777	24.2155	0.00772735	0.440661	0.324229	0.382445	23.1495	0.208067	0.372071	0.246537	0.309304	22.8496	0.448795	1.35476	0.898134	1.12645
		778	-16.0136	13.5679	0.851349	0.740225	0.795787	-2.46362	-4.73408	0.713355	0.718076	0.715716	3.73227	-12.0643	0.3164	0.364654	0.340527
		779	5.83964	4.13205	0.352464	0.353851	0.353158	1.50486	2.59426	1.86342	1.67981	1.77162	-3.34797	4.36912	3.33432	4.65242	3.99337
		780	-65.0769	-69.4601	0.808469	0.93887	0.87367	-49.5967	-58.1598	4.69222	3.00511	3.84866	150.664	40.2453	2.21197	1.90333	2.05765
		781	-7.48406	-7.43914	6.89762	8.15199	7.52481	-4.5325	-0.97969	0.230502	0.192272	0.211387	-6.13988	-1.7296	0.149788	0.155276	0.152532
		782	-8.35108	43.884	0.855406	1.09596	0.975684	-7.24952	36.2398	0.226238	0.310083	0.268161	15.1969	-11.2085	2.11574	5.71826	3.917
		783	-0.911594	2.7757	0.58631	0.545405	0.565857	1.08406	-2.0924	0.474141	0.438771	0.456456	-3.14602	0.90725	3.1135	3.31886	3.21618
		784	-1.97332	-0.598152	0.170885	0.177138	0.174011	1.234	-4.40211	0.978254	0.966639	0.972447	14.1426	-17.8071	7.33749	7.68353	7.51051
		785	-5.82781	4.78238	1.12905	0.93967	1.03436	-2.93307	1.69152	0.183815	0.196089	0.189952	-2.535	1.00394	0.2383	0.273505	0.255903
		786	7.38101	4.35827	21.6375	24.5354	23.0864	-3.39361	0.425688	1.32943	1.68691	1.50817	-2.14599	0.367466	0.46449	0.467827	0.466159
		787	0.945644	10.8762	0.544383	0.535764	0.540073	5.1837	11.57	2.6176	2.61211	2.61485	-2.82355	-13.1273	0.898426	0.965613	0.93202
		788	-5.85241	-6.6454	0.135031	0.11772	0.126375	-2.37758	4.72757	0.738702	0.867295	0.802999	-1.63238	18.8275	0.632946	0.688484	0.660715
		789	1.2204	8.96351	0.602645	0.610211	0.606428	-3.60932	4.06883	1.21833	1.36908	1.29371	-17.4165	4.88858	0.265525	0.289423	0.277474
		790	10.8666	-4.68561	0.825365	0.974859	0.900112	10.5379	-4.47497	0.13789	0.176778	0.157334	16.6259	-9.59575	0.10823	0.119689	0.11396
		791	-22.6344	8.60533	0.191068	0.116786	0.153927	-14.4022	7.85279	0.232953	0.109034	0.170993	15.5169	-3.38791	0.488872	0.207445	0.348159
		792	96.0348	38.1831	9.67307	3.9627	6.81789	32.8757	1.99467	0.640214	0.263927	0.45207	-38.9815	-18.3354	0.411758	0.321498	0.366628
		793	-2.12535	1.41627	0.189193	0.177931	0.183562	-0.0176643	1.39623	1.18024	1.40637	1.2933	-2.16633	0.403744	0.742189	0.708342	0.725265
		794	-0.404627	-1.02609	0.351702	0.350181	0.350941	2.40981	-0.949729	0.293695	0.276457	0.285076	-3.83521	7.1947	3.19577	2.75266	2.97421
		795	11.6207	6.34316	0.493908	0.426276	0.460092	1.80032	0.890844	1.58065	1.78757	1.68411	-15.5513	-6.07534	0.573905	0.584543	0.579224
		796	4.15091	-0.989412	1.87455	2.06439	1.96947	-0.0135095	1.3213	0.274376	0.27599	0.275183	1.76064	1.47754	0.464281	0.472103	0.468192
		797	6.33347	-9.9879	0.344452	0.548049	0.446251	4.62178	-13.175	0.497031	0.685536	0.591284	2.41896	-19.9744	0.500714	0.674404	0.587559
		798	-97.65	78.1672	0.971972	0.777609	0.874791	4.31917	-3.39917	0.167687	0.147832	0.157759	7.97441	-7.48883	0.183943	0.181629	0.182786
		799	-1.34282	-0.102366	0.236711	0.266144	0.251427	-0.799566	0.337089	0.131927	0.151968	0.141948	0.714655	0.503522	0.100346	0.114823	0.107584
		800	4.80056	5.78735	0.109413	0.110892	0.110153	-1.88979	4.42693	0.879116	0.714825	0.79697	-9.01144	11.1095	0.297924	0.317783	0.307853
		801	-0.397807	-0.245143	0.238282	0.264801	0.251542	0.340359	-4.5048	0.412294	0.446124	0.429209	3.32665	-5.39216	1.0307	1.16254	1.09662
		802	-1.99864	0.58676	1.5343	1.47219	1.50325	-2.52351	2.84116	0.836377	0.755861	0.796119	11.5315	15.1491	9.82373	8.03274	8.92823
		803	87.5562	9.56597	0.705349	0.591558	0.648454	84.5333	8.02929	1.04503	0.758591	0.901808	119.685	10.8244	13.6052	20.6173	17.1112
		804	-0.0881567	1.87371	0.457685	0.498659	0.478172	-1.36682	1.19495	0.135121	0.156272	0.145696	-0.68985	1.85758	0.208994	0.221012	0.215003
		805	1.52326	1.57886	0.360537	0.530151	0.445344	-0.00311114	-2.5206	0.138508	0.152552	0.14553	-4.40035	-7.37553	0.474537	0.516641	0.495589
		806	-1.18397	0.461419	0.63817	0.631002	0.634586	-1.41239	1.33285	0.28705	0.299665	0.293357	-0.697481	-0.373449	0.162833	0.177168	0.17
		807	2.32125	-9.21519	0.600091	0.417237	0.508664	-8.115	-0.121282	0.114475	0.0990844	0.10678	-5.90989	-14.7487	1.96311	1.38712	1.67511
		808	-1.11428	0.984027	0.405749	0.456253	0.431001	-0.0145308	0.0582024	0.43323	0.488253	0.460741	-0.0945621	1.20842	0.144913	0.160869	0.152891
		809	25.24	8.81957	0.461195	0.50678	0.483987	23.899	0.756134	0.29268	0.265459	0.27907	18.6446	2.97127	0.18073	0.166195	0.173462
		810	-155.681	41.555	20.0926	4.48123	12.2869	-31.6149	24.596	7.44122	1.8852	4.66321	23.9017	5.97037	0.57377	0.462686	0.518228
		811	-12.0918	-1.75981	0.414717	0.408512	0.411614	-2.88043	3.62009	0.12097	0.130104	0.125537	-1.96888	4.32488	0.391672	0.399162	0.395417
		812	0.351921	0.713741	0.72514	0.85945	0.792295	0.617086	0.482271	0.396365	0.364839	0.380602	-0.46574	-0.402087	0.0980818	0.0949042	0.096493
		813	21.1716	8.67052	1.33027	1.3506	1.34044	19.9396	7.84897	0.496021	0.495684	0.495853	5.28638	-27.0878	1.22258	0.634213	0.928399
		814	2.78362	1.06004	0.627492	0.668596	0.648044	1.29282	2.89774	4.33604	3.19807	3.76705	-1.34899	-4.1956	0.690206	0.680768	0.685487
		815	83.1254	74.3691	0.412587	0.407735	0.410161	-47.0333	-30.8789	0.73856	0.701446	0.720003	-57.0754	-42.0579	1.98581	2.21038	2.09809
		816	3.95474	-1.69153	0.112499	0.117869	0.115184	3.38567	-1.6496	0.0888667	0.0934262	0.0911464	1.78817	-2.18239	0.165938	0.165099	0.165519
		817	-8.96177	5.44493	5.56898	5.33972	5.45435	0.156885	1.85022	0.728798	0.73413	0.731464	1.0088	-1.45268	0.440339	0.428994	0.434667
		818	4.15441	-20.7562	0.456357	0.484192	0.470274	5.10474	-13.1335	1.82127	1.96423	1.89275	-4.27125	4.94611	3.538	4.07287	3.80543
		819	8.55192	-12.9079	7.23529	6.64727	6.94128	17.0366	-22.9133	3.64809	3.65297	3.65053	6.13978	-3.53584	1.24714	1.28836	1.26775
		820	0.465458	-0.254304	0.0580532	0.0712584	0.0646558	0.144026	-0.0366149	0.0543774	0.0587294	0.0565534	-0.338932	1.16617	0.559285	0.595077	0.577181
		821	-0.779921	-0.379925	0.277249	0.217171	0.24721	24.4983	1.65504	2.89198	1.91486	2.40342	19.6444	5.03416	17.6685	8.19795	12.9332
		822	2.54925	17.5264	13.2794	19.6334	16.4564	0.516331	-2.66869	0.577365	0.667959	0.622662	-2.46448	-3.25269	0.29985	0.384628	0.342239
		823	5.88992	6.43011	1.56566	2.02392	1.79479	-0.298806	-0.775647	0.176096	0.188544	0.18232	-1.25253	-2.26738	1.52714	2.05167	1.7894
		824	6.70043	23.1029	5.63102	4.99036	5.31069	-0.104629	7.16977	1.21876	1.25691	1.23784	-0.348301	0.115822	0.236535	0.240235	0.238385
		825	-1.20717	1.00025	0.141963	0.153836	0.1479	-1.09017	0.497668	0.111888	0.118979	0.115434	-0.661153	-3.44862	0.392603	0.451165	0.421884
		826	5.08973	-1.26577	0.795967	0.742304	0.769135	1.6313	-0.611045	0.148762	0.158073	0.153417	-1.31158	-1.53773	0.152138	0.167835	0.159986
		827	-0.611906	-0.398855	0.390849	0.383712	0.38728	0.36097	-1.38447	0.130899	0.128706	0.129803	0.126935	1.15453	0.191579	0.202228	0.196904
		828	-0.784411	-1.69498	0.149173	0.188076	0.168624	0.982254	-0.192657	0.164115	0.175896	0.170006	9.47803	7.67375	1.62486	1.62554	1.6252
		829	-13.8156	16.2629	0.12686	0.144428	0.135644	-15.0634	19.6458	0.0710795	0.0922561	0.0816678	-12.5081	13.8962	0.1891	0.351397	0.270248
		830	-7.74999	-13.5832	3.90361	3.09198	3.49779	-6.22211	2.9669	1.19227	1.06554	1.1289	-12.8285	-3.97674	0.407609	0.387845	0.397727
		831	-1.61227	0.394316	0.369129	0.448197	0.408663	4.52825	-6.33572	0.15594	0.226113	0.191026	0.784075	-0.872098	0.286234	0.366931	0.326582
		832	1.8445	4.78372	1.32129	1.63998	1.48063	1.15925	1.82521	0.517903	0.517965	0.517934	1.53653	-0.122091	0.213408	0.220659	0.217034
		833	40.6376	93.1961	1.47398	2.50499	1.98948	-74.4926	-186.132	0.959646	1.78044	1.37004	-36.4576	-84.7174	0.704424	1.3179	1.01116
		834	1.59277	-1.99208	1.55831	1.91667	1.73749	0.128456	-0.805693	0.313552	0.363796	0.338674	-0.344014	-0.490595	0.167903	0.176882	0.172392
		835	5.04704	9.69184	0.558784	0.524502	0.541643	4.9362	-2.96187	6.88092	7.61804	7.24948	-7.60526	-16.6822	1.31906	1.34766	1.33336
		836	1.40674	0.930249	0.302448	0.329193	0.31582	0.373276	0.164592	0.274711	0.302554	0.288633	-2.22739	-1.47901	0.13048	0.13445	0.132465
		837	0.456553	-0.01983	0.87827	0.910935	0.894603	0.44151	0.813894	0.593273	0.597543	0.595408	0.327842	-0.453021	0.240716	0.242593	0.241654
		838	2.98737	11.9069	0.348159	0.339633	0.343896	2.0017	5.56091	0.69255	0.778205	0.735378	-0.830053	-2.16644	0.17931	0.201442	0.190376
		839	-0.516509	-1.499	0.179576	0.179607	0.179592	0.227566	-0.46427	0.268196	0.253544	0.26087	1.18569	0.243652	0.414574	0.39422	0.404397
		840	3.58052	-10.0469	0.58524	0.625785	0.605512	-1.15281	0.665773	0.136571	0.138326	0.137449	-0.875169	1.75544	0.264424	0.264728	0.264576
		841	-0.90385	2.65011	0.0568571	0.0606487	0.0587529	-0.454672	0.385097	0.357765	0.384023	0.370894	2.72572	0.25398	0.794791	0.884683	0.839737
		842	-0.187365	-2.52995	0.451007	0.448903	0.449955	-7.94377	4.69753	0.378098	0.418222	0.39816	-18.7012	-1.15717	0.293839	0.288388	0.291113
		843	-3.83369	4.50502	0.230742	0.34396	0.287351	0.0537628	-3.87514	0.0944213	0.111377	0.102899	3.43197	-1.83556	0.130282	0.136373	0.133328
		844	21.3019	7.33313	0.296331	0.338122	0.317227	16.3337	-2.87563	0.510394	0.536732	0.523563	18.1746	-8.12741	0.165149	0.162096	0.163622
		845	0.679242	-0.811726	1.07345	1.1107	1.09208	2.06426	1.58426	0.508086	0.505279	0.506683	-4.29067	1.12087	0.401592	0.413947	0.40777
		846	-1.76118	-0.735971	1.65082	1.55007	1.60044	0.585453	1.10876	0.601963	0.671263	0.636613	2.13025	-0.231542	0.613223	0.65192	0.632571
		847	-32.9591	11.4882	15.6556	11.5078	13.5817	-0.299487	-0.0634455	0.643757	0.699653	0.671705	0.209291	0.0122489	0.427018	0.478292	0.452655
		848	2.72868	2.40962	0.162678	0.168767	0.165722	1.23822	1.51077	0.12262	0.13028	0.12645	-2.12751	-2.37807	0.0842433	0.0913136	0.0877784
		849	0.60855	22.3116	0.382468	0.537798	0.460133	-4.19143	19.112	0.552596	1.54649	1.04954	-3.2782	-45.6374	2.86655	18.126	10.4963
		850	0.114338	1.90405	0.160141	0.166607	0.163374	0.249691	0.985605	0.470294	0.479184	0.474739	-13.4135	0.702606	0.558657	0.554485	0.556571
		851	7.30647	-0.391151	1.39477	1.38471	1.38974	6.77522	-0.495077	0.97405	0.842561	0.908306	7.06662	-1.55918	2.87811	3.01888	2.94849
		852	15.4529	9.14532	1.48577	1.65097	1.56837	14.1003	10.3148	1.05222	1.06138	1.0568	13.4359	9.2144	1.0865	1.06324	1.07487
		853	9.81067	-1.61668	6.21869	6.96074	6.58971	1.39077	0.0583197	0.429522	0.45516	0.442341	-0.545777	0.0382538	0.141108	0.152571	0.146839
		854	-0.75717	-1.72495	3.48845	3.2517	3.37008	-0.394234	0.686872	0.265196	0.295004	0.2801	1.61007	-1.63627	0.673186	0.693697	0.683441
		855	4.28539	-76.3803	0.428156	0.612308	0.520232	5.1451	-75.9072	0.23557	0.418562	0.327066	-2.08257	48.0523	0.229204	0.228156	0.22868
		856	3.41885	-0.191376	0.285214	0.28003	0.282622	0.659103	-2.67609	0.615824	0.674149	0.644986	-2.39391	1.3347	0.263225	0.280808	0.272016
		857	-6.99511	4.6675	0.912173	0.935324	0.923749	-1.07619	1.39613	0.0982204	0.105408	0.101814	2.03615	-2.63346	0.0763072	0.0772562	0.0767817
		858	0.111107	-2.20144	3.2353	3.64374	3.43952	2.21942	0.650564	0.068286	0.0688717	0.0685789	-1.18939	-1.21448	0.0519112	0.0530557	0.0524834
		859	-3.27009	2.81971	0.249304	0.257505	0.253404	-1.00986	-1.05522	0.466923	0.517978	0.492451	-0.134721	-6.79744	0.346618	0.361871	0.354244
		860	-2.3428	-6.4718	0.401866	0.400309	0.401087	0.864317	-6.37601	2.04116	1.78608	1.91362	4.58064	-8.42978	1.54008	1.79235	1.66621
		861	-1.10347	5.65599	1.02387	0.857306	0.940591	-0.606821	-0.0111448	0.112301	0.118052	0.115176	22.8756	-2.59931	0.748983	0.753845	0.751414
		862	-4.50003	8.48279	0.259741	0.277678	0.26871	3.75207	0.615969	0.352598	0.366072	0.359335	0.512038	-11.2399	0.472913	0.506564	0.489738
		863	-4.67078	-6.40475	1.23968	1.38633	1.313	-0.206524	1.01049	0.253909	0.271552	0.262731	-1.42721	-5.83999	0.341089	0.327496	0.334292
		864	11.8001	4.42762	3.22877	3.14993	3.18935	6.28941	6.04639	4.83114	5.3184	5.07477	7.4716	2.54964	0.189017	0.18975	0.189383
		865	2.45948	-4.19454	0.115708	0.10831	0.112009	0.716442	-3.81855	0.0526531	0.0501259	0.0513895	-0.896721	-2.56711	0.0528968	0.0554136	0.0541552
		866	3.76879	-0.740422	1.01214	0.648928	0.830535	9.66637	3.54419	1.12965	0.799378	0.964514	6.98062	5.74002	0.39647	0.376586	0.386528
		867	-8.65419	4.8745	0.338339	0.309521	0.32393	-0.24182	-2.40999	0.680767	0.890467	0.785617	5.32157	-5.61045	0.119738	0.150232	0.134985
		868	10.698	-2.47688	0.140358	0.132776	0.136567	-2.43459	1.18987	0.104685	0.110645	0.107665	-9.92202	-1.07392	0.102471	0.122411	0.112441
		869	-20.3848	24.8316	0.174616	0.198007	0.186311	-21.4857	29.5542	0.202904	0.231038	0.216971	-10.996	13.5964	0.632277	0.641165	0.636721
		870	-3.22923	0.14775	0.0486177	0.0482106	0.0484141	0.343671	1.04229	0.469278	0.167466	0.318372	110.005	-5.824	9.05317	1.50213	5.27765
		871	0.646485	0.183801	0.370644	0.356119	0.363382	-0.0758637	-0.858498	0.156689	0.159999	0.158344	-3.0919	-3.37728	0.0797136	0.0842381	0.0819758
		872	-4.20252	0.639057	0.326774	0.35254	0.339657	-4.80143	1.3527	0.362282	0.353957	0.35812	-8.65641	3.9826	0.740819	0.735187	0.738003
		873	-8.81098	2.89289	0.558831	0.576183	0.567507	-6.0318	1.77754	0.473206	0.477492	0.475349	-5.51815	2.21143	0.693673	0.915921	0.804797
		874	-103.024	169.958	0.475978	0.65001	0.562994	-30.2291	24.27	1.74667	2.4862	2.11644	19.2889	-38.0831	0.431496	0.494131	0.462814
		875	11.0401	-7.31802	0.178822	0.185061	0.181942	15.0184	-6.12853	3.31375	3.64364	3.47869	13.1539	-8.01488	1.8075	2.26492	2.03621
		876	-126.96	-140.478	16.0398	12.5853	14.3126	-11.5066	-4.85437	1.37822	1.61075	1.49448	25.0378	30.9312	0.443576	0.508274	0.475925
		877	-1.15665	-1.26203	0.209037	0.208238	0.208638	-0.130453	2.15722	0.210734	0.213291	0.212013	-6.16651	-0.896314	0.616453	0.56177	0.589112
		878	0.875741	-0.111574	0.0584174	0.0649562	0.0616868	-0.998638	0.374071	0.0509304	0.0555075	0.0532189	-0.594465	-1.69428	0.488076	0.493949	0.491013
		879	3.3805	-2.08115	0.539856	0.655361	0.597608	1.78013	1.66822	0.402642	0.91081	0.656726	-4.57807	-1.40489	0.0678653	0.083241	0.0755531
		880	-8.34428	5.40169	0.925658	1.03289	0.979273	-2.16013	3.42747	0.565567	0.661147	0.613357	0.140595	3.6223	0.0695004	0.0817802	0.0756403
		881	-6.95118	-0.668533	1.24765	1.05036	1.14901	-7.69806	0.215003	0.215819	0.174896	0.195358	-3.15011	-2.01679	0.29344	0.24222	0.26783
		882	1.42317	1.44063	0.325609	0.307811	0.31671	-1.49304	-3.38002	0.84422	0.862542	0.853381	10.88	2.55591	0.766369	0.723244	0.744806
		883	9.02005	17.5348	0.239757	0.343942	0.29185	-15.1911	4.3321	0.104341	0.122023	0.113182	-19.7538	2.38905	0.215794	0.268166	0.24198
		884	8.98903	17.2071	0.239276	0.341998	0.290637	-15.1403	4.05551	0.104381	0.122097	0.113239	-19.6889	2.11796	0.215774	0.268147	0.24196
		885	2.16242	5.01362	1.63276	2.17865	1.9057	-2.95963	2.19688	1.11345	1.4033	1.25837	1.56537	-1.97003	0.117101	0.140131	0.128616
		886	14.4079	-9.70975	0.235575	0.220123	0.227849	6.10659	-4.44776	0.456303	0.498817	0.47756	-4.96323	9.76712	0.627862	0.711119	0.66949
		887	7.69075	-21.1716	0.677791	0.931782	0.804786	-0.435551	3.41293	0.512868	0.721624	0.617246	-5.22191	13.1851	0.772392	1.04506	0.908724
		888	8.28327	-13.8631	0.0709179	0.0868306	0.0788742	-1.75309	-1.62145	4.03157	5.88439	4.95798	1.06651	16.1608	7.93559	9.85809	8.89684
		889	-0.627623	4.42576	1.49135	1.67582	1.58359	3.46353	0.0497949	0.844577	0.992053	0.918315	-6.16938	15.8046	0.943487	1.11206	1.02778
		890	1.72047	-16.7198	0.584332	0.701237	0.642784	2.84502	-6.85991	0.4383	0.626234	0.532267	0.120679	-8.38635	0.790956	1.09762	0.944286
		891	0.372363	-1.98469	0.314496	0.372881	0.343688	1.93977	0.778675	0.561294	0.635244	0.598269	-0.0435923	1.78055	0.683865	0.727698	0.705782
		892	-4.74649	-6.3925	0.798655	0.829807	0.814231	0.0288268	0.635026	0.525514	0.583682	0.554598	1.75702	4.30563	1.24817	1.39893	1.32355
		893	-5.20338	7.92275	0.442236	0.486954	0.464595	2.05502	-10.1241	0.938899	1.04345	0.991176	2.53165	-13.8345	0.175827	0.241148	0.208488
		894	-15.5655	-4.19932	0.3695	0.400866	0.385183	-11.2254	-2.16178	1.32787	1.39185	1.35986	-0.839069	6.60172	0.545175	0.669674	0.607424
		895	-17.5311	0.774387	0.493861	0.629934	0.561898	-0.362549	1.23296	0.29157	0.307694	0.299632	6.69981	0.00977712	0.278734	0.299158	0.288946
		896	3.75512	0.590626	2.1634	2.06964	2.11652	-1.32847	-1.48564	0.219806	0.261972	0.240889	0.276895	-1.533	0.361691	0.386524	0.374108
		897	-3.12631	6.78249	0.460638	0.504473	0.482555	3.80889	2.21417	0.597203	0.770421	0.683812	3.57536	-0.200096	0.543673	0.756025	0.649849
		898	2.76953	-2.62155	1.00535	1.21746	1.11141	-0.89483	-0.382317	0.160541	0.172385	0.166463	-0.596817	-0.765618	0.521268	0.470217	0.495742
		899	4.97751	19.6306	0.56253	0.821337	0.691934	-3.51749	9.77232	1.01966	1.59376	1.30671	-12.2329	10.5773	0.36981	0.485329	0.42757
		900	-1.79658	1.31254	1.09203	1.19169	1.14186	0.127827	0.306565	0.358503	0.401588	0.380046	1.99486	-0.381405	0.37502	0.384126	0.379573
		901	-1.83897	-3.36773	0.729662	0.807898	0.76878	-3.44433	-1.59022	0.344918	0.374182	0.35955	-12.7958	-6.11904	2.46573	2.94117	2.70345
		902	-6.01909	-19.2337	0.379954	0.496234	0.438094	1.14352	-10.1941	0.425855	0.924641	0.675248	3.52451	-4.42912	0.489102	1.1647	0.826899
		903	0.0194972	-11.4312	8.77456	7.29495	8.03476	0.958136	1.98774	0.249659	0.27015	0.259905	-0.919611	-1.78509	0.456411	0.504735	0.480573
		904	-7.938	21.855	0.44841	0.9241	0.686255	-4.25559	33.3616	0.70695	1.15715	0.932048	-2.30876	35.4455	0.540145	0.991006	0.765575
		905	-1.2928	-0.129834	0.174138	0.181268	0.177703	1.6109	-1.11932	0.151099	0.156889	0.153994	-0.396831	0.472095	0.180852	0.189017	0.184935
		906	0.484794	-0.710593	0.609697	0.686195	0.647946	0.698756	-1.29146	0.506457	0.59952	0.552989	-21.5068	-11.6593	3.90342	4.11162	4.00752
		907	8.18176	-14.8456	0.425186	0.441386	0.433286	-4.47514	7.6586	0.375279	0.414811	0.395045	-3.71068	-3.6192	0.85222	0.945404	0.898812
		908	0.706442	-0.250873	0.786674	0.846701	0.816687	-2.27978	0.870225	0.310517	0.331715	0.321116	-1.22133	0.512756	0.157079	0.15266	0.15487
		909	0.377249	3.5957	0.551004	0.572238	0.561621	2.03892	1.85929	0.563417	0.572001	0.567709	-1.42144	-0.9357	0.40477	0.422183	0.413477
		910	8.402	0.98101	0.135412	0.125028	0.13022	6.13785	-0.40125	0.41922	0.425011	0.422115	-8.45667	-2.93529	0.893775	1.09981	0.996791
		911	-79.2322	21.2884	1.23016	1.09089	1.16053	-35.2779	8.91614	2.15885	1.52071	1.83978	2.63881	-0.917673	0.311775	0.342934	0.327354
		912	3.73378	-2.70604	0.238712	0.206972	0.222842	-2.08991	2.42027	0.409772	0.436809	0.42329	1.29436	4.02829	2.17406	2.2392	2.20663
		913	2.60394	1.51134	0.153853	0.170963	0.162408	-2.4969	-0.662332	0.235432	0.259769	0.2476	-10.3643	-5.8276	1.24779	1.32133	1.28456
		914	-1.16898	-0.960585	0.600553	0.539325	0.569939	0.744677	-0.653148	0.300866	0.271313	0.286089	1.33287	-0.84413	0.372064	0.331109	0.351587
		915	-23.1429	18.7769	0.720922	0.717867	0.719394	-22.7198	17.5059	0.556832	0.53673	0.546781	-25.3069	20.6461	0.230561	0.203006	0.216783
		916	2.01003	0.522636	0.36689	0.377134	0.372012	4.72486	0.374642	0.21105	0.227607	0.219329	-4.03278	0.659852	0.217434	0.241238	0.229336
		917	2.71292	-2.97914	0.660672	0.691015	0.675844	3.69205	-4.26428	0.204095	0.207328	0.205711	5.65085	-4.74148	1.94616	2.12187	2.03402
		918	5.11547	1.90879	0.325434	0.305544	0.315489	0.195657	1.68387	0.842534	0.88234	0.862437	-1.35137	-0.969182	1.38555	1.36347	1.37451
		919	-6.87093	-0.315615	0.304193	0.364824	0.334509	6.13105	1.97114	0.402691	0.4831	0.442896	2.40225	11.0686	0.902411	1.05778	0.980097
		920	-0.932382	0.741533	0.130963	0.143818	0.137391	1.82808	1.35414	0.246305	0.264315	0.25531	20.7099	-8.95133	3.60319	4.44269	4.02294
		921	0.130909	0.811046	2.28993	2.09395	2.19194	-2.58099	-0.199231	0.382868	0.39419	0.388529	1.42775	-0.834366	0.265844	0.269423	0.267633
		922	-8.76766	0.804816	0.263928	0.356059	0.309993	-9.43122	-2.98337	0.192851	0.231637	0.212244	-18.1328	-9.07164	0.177505	0.168586	0.173046
		923	3.25833	35.211	0.261807	0.270381	0.266094	-19.4362	-57.7794	2.64373	4.27123	3.45748	-29.0243	-104.051	0.887847	1.15358	1.02071
		924	7.76686	4.45869	0.345737	0.407608	0.376673	0.765681	3.90591	1.16051	1.44846	1.30449	-4.73557	-3.98646	0.334548	0.358192	0.34637
		925	4.43892	-2.96585	1.63048	1.50787	1.56918	1.85088	-0.631344	0.448434	0.440277	0.444356	-1.23396	0.00235367	0.207243	0.201473	0.204358
		926	-15.875	1.61824	0.894579	0.944471	0.919525	-7.40429	-4.94413	0.164282	0.188319	0.1763	3.77098	0.263234	0.118319	0.123168	0.120743
		927	61.7655	10.7939	4.67751	2.57854	3.62802	63.9483	5.60423	1.73023	1.15909	1.44466	48.6984	-2.35236	1.6261	1.69636	1.66123
		928	-0.938984	-0.760448	0.0861655	0.0958651	0.0910153	5.55844	2.6627	0.495598	0.592927	0.544262	8.53173	16.5723	2.13197	2.31375	2.22286
		929	11.3463	17.6882	8.11183	9.81452	8.96317	-0.527507	-0.163236	0.41788	0.428565	0.423222	0.274463	0.619862	0.391941	0.404624	0.398283
		930	-0.792952	-8.18494	0.556187	0.621825	0.589006	-5.05928	10.8078	1.71064	2.06979	1.89022	-5.16499	25.1069	0.527007	0.544107	0.535557
		931	1.43676	0.180165	0.380265	0.39173	0.385998	-0.790163	-0.178423	0.268175	0.268293	0.268234	2.14296	-0.813136	0.353791	0.283156	0.318473
		932	-2.44746	8.42667	1.27458	1.51228	1.39343	-2.5861	6.25342	0.146187	0.18511	0.165648	-3.93689	9.5688	0.384691	0.434146	0.409418
		933	3.37276	-7.46629	0.375974	0.402303	0.389138	1.66215	-0.569409	3.27913	4.02681	3.65297	-2.06204	8.95033	0.689578	0.727854	0.708716
		934	4.29666	-1.22797	1.32277	1.10984	1.2163	-11.579	-0.352204	0.391786	0.367452	0.379619	-19.5469	1.6	0.267294	0.252271	0.259783
		935	-90.9586	86.6664	0.910639	0.961873	0.936256	-35.5373	32.3386	3.28031	3.55122	3.41577	13.2906	-13.6927	0.245965	0.236389	0.241177
		936	-0.188743	-0.174449	0.211046	0.202408	0.206727	-0.96445	0.953843	0.263617	0.258189	0.260903	0.110114	2.12061	1.02672	0.946609	0.986664
		937	-15.1169	3.34903	1.47087	1.43807	1.45447	-10.9232	4.14276	0.652221	0.636216	0.644219	-131.853	298.184	7.41425	14.1611	10.7877
		938	-4.80304	22.3042	0.84728	0.925119	0.8862	10.3681	-11.6397	1.73864	1.94608	1.84236	1.63797	-5.47952	0.536094	0.530395	0.533245
		939	-6.02572	20.0257	0.837978	0.919288	0.878633	10.2633	-15.0958	1.77576	2.00081	1.88829	0.415692	-7.74933	0.53759	0.535773	0.536682
		940	-2.04938	-1.7233	0.829609	0.811188	0.820398	0.900573	0.374733	0.56745	0.578741	0.573095	0.751849	1.59832	0.559983	0.582267	0.571125
		941	0.431229	-0.737786	0.211889	0.217825	0.214857	-1.84144	2.53643	0.221648	0.231198	0.226423	-1.2546	5.68268	0.762586	0.756149	0.759367
		942	2.9045	0.108753	0.330785	0.310341	0.320563	7.97667	5.51675	2.99853	3.3274	3.16296	8.49954	11.4966	4.1671	5.02557	4.59634
		943	0.984436	0.940022	0.370704	0.439791	0.405247	0.406451	0.391514	0.142124	0.158115	0.150119	-0.427095	-0.101987	0.0785244	0.0815969	0.0800606
		944	-18.7525	1.08102	0.339568	0.275556	0.307562	-17.73	2.03949	0.25335	0.227412	0.240381	-14.8452	5.31101	0.849399	0.754857	0.802128
		945	6.08622	-2.62442	1.54705	2.32279	1.93492	3.98858	-1.98246	0.951462	0.842693	0.897078	-0.575278	0.575185	0.143831	0.132618	0.138224
		946	-0.109177	2.29919	4.88315	4.02206	4.45261	-2.07219	-1.07746	0.511121	0.46576	0.48844	-0.394142	-1.49926	0.347687	0.313627	0.330657
		947	3.35547	2.73696	0.505808	0.558453	0.532131	-1.75348	0.266557	0.846494	0.978254	0.912374	-2.50345	0.219501	0.488489	0.462343	0.475416
		948	-1.94013	-2.27193	0.466131	0.535254	0.500693	1.38502	0.555594	0.346748	0.414221	0.380485	-1.0982	-1.2774	0.389662	0.438599	0.41413
		949	-2.36659	2.47327	1.01316	1.06201	1.03759	-0.276308	1.07388	0.198011	0.213618	0.205815	-1.14874	3.83396	0.578988	0.645161	0.612074
		950	1.156	0.849971	1.1521	1.08184	1.11697	-1.06652	0.569489	0.245643	0.234687	0.240165	-2.23232	-0.395636	0.287531	0.287554	0.287543
		951	-1.93335	0.746283	0.323345	0.313401	0.318373	4.38663	0.660521	1.07808	1.13297	1.10552	2.56751	-2.14866	0.316778	0.345795	0.331287
		952	7.52783	19.4523	0.759071	0.691456	0.725264	-16.4109	-10.3685	1.59011	1.86571	1.72791	-31.9428	-22.8796	0.80911	1.33444	1.07178
		953	4.62647	-2.513	0.843026	0.901635	0.872331	-1.30771	-0.143873	0.43215	0.445376	0.438763	-3.0603	-0.841776	0.701901	0.7338	0.71785
		954	7.26046	8.44172	0.413554	0.432776	0.423165	12.4218	12.2464	1.52799	1.533	1.5305	19.0345	7.41496	3.99743	8.6806	6.33902
		955	6.80579	-9.41349	0.715577	0.701125	0.708351	-3.14778	1.23865	1.19869	1.11406	1.15637	-12.3927	14.4409	0.536409	0.488637	0.512523
		956	9.63259	-19.6754	1.53517	1.80797	1.67157	-2.02555	-3.92344	0.901202	0.99347	0.947336	1.02539	-5.22391	1.36772	1.51236	1.44004
		957	-1.01493	-2.21869	0.79397	0.737622	0.765796	-3.97872	5.32647	0.775396	0.742741	0.759069	-1.7795	8.18972	0.366914	0.374578	0.370746
		958	-4.17188	-1.28789	0.237336	0.258979	0.248157	-2.28392	-2.82083	0.688325	0.681884	0.685105	4.26393	-1.43837	0.67472	0.715359	0.69504
		959	-9.96148	-10.6124	0.201489	0.213696	0.207592	-0.478222	-2.7014	1.85099	1.67244	1.76171	10.1735	-15.688	3.28659	2.52563	2.90611
		960	0.711238	-0.0430542	1.01091	1.21674	1.11383	0.237316	0.104271	0.277479	0.347385	0.312432	-0.00523663	1.3285	0.281232	0.339204	0.310218
		961	-30.1599	-23.6617	0.488809	0.6008	0.544805	-21.4163	-4.98783	0.867618	1.22458	1.0461	-31.9029	-25.6897	0.466873	0.592811	0.529842
		962	-1.82453	-4.70594	2.19249	2.29249	2.24249	3.67189	-3.4861	1.44027	1.54398	1.49213	0.677784	0.821056	0.338546	0.342079	0.340312
		963	-7.14321	-6.71913	1.29595	1.20557	1.25076	2.80598	2.10143	0.275797	0.303233	0.289515	2.58384	-2.81545	0.146943	0.15619	0.151567
		964	2.49211	0.692465	0.161154	0.18535	0.173252	1.02452	-0.999829	0.269128	0.317379	0.293254	0.389639	-2.38344	0.982881	0.995022	0.988952
		965	-10.5465	-7.35752	2.36759	2.49622	2.4319	-8.05554	-2.14913	0.456902	0.434159	0.44553	-6.84702	-10.452	1.73164	1.44805	1.58985
		966	3.54071	1.09155	0.218528	0.204727	0.211627	-3.5712	0.743879	0.522245	0.503648	0.512946	6.48641	-1.23984	1.24547	1.14124	1.19335
		967	8.49348	4.97283	0.580279	0.618292	0.599285	3.20517	7.53196	0.478943	0.535509	0.507226	-2.99522	-5.25087	0.455592	0.49395	0.474771
		968	-1.90412	-2.07772	0.816266	0.644752	0.730509	-10.9493	1.09155	8.48491	5.66512	7.07502	1.39116	-1.49573	0.256192	0.272908	0.26455
		969	-1.91313	9.31324	0.160657	0.164951	0.162804	-1.27195	2.9383	0.361393	0.403119	0.382256	1.55606	-13.3864	0.541735	0.59474	0.568237
		970	8.99915	3.40341	5.56093	5.35326	5.45709	1.61453	-0.545413	0.681502	0.708259	0.69488	-1.87102	0.839363	0.524986	0.543178	0.534082
		971	-11.9514	-10.1649	0.234583	0.236997	0.23579	-0.709591	-7.89534	0.469707	0.413964	0.441835	-4.0284	-4.45026	0.399336	0.352283	0.375809
		972	9.69318	1.64831	7.1369	7.57027	7.35358	8.20847	5.63047	0.565093	0.584135	0.574614	7.09328	3.03515	0.621317	0.620274	0.620796
		973	1.43829	-1.30724	1.01267	0.937247	0.974959	-0.222872	-1.69661	0.648358	0.63024	0.639299	-0.674143	-0.0277211	0.191592	0.18976	0.190676
		974	-0.502819	-2.84185	0.271895	0.273129	0.272512	-2.85894	5.36339	0.733776	0.740876	0.737326	-9.37517	7.95657	0.992632	1.13842	1.06552
		975	-5.39262	2.75848	1.31078	1.28632	1.29855	-2.53012	2.67027	1.30294	1.36515	1.33405	0.305771	1.5179	0.432009	0.480423	0.456216
		976	0.391075	1.38967	1.45776	1.37146	1.41461	-2.80855	-0.303968	0.279634	0.266223	0.272928	-0.499851	0.466417	0.139856	0.126975	0.133416
		977	-6.7395	19.572	2.10202	1.88794	1.99498	-2.75546	17.4448	1.10742	1.15169	1.12956	-15.8359	21.7434	3.28701	3.62397	3.45549
		978	0.811893	-0.178478	1.1608	1.07445	1.11762	0.148332	-0.480223	0.516947	0.499805	0.508376	0.0992528	0.908771	0.587873	0.572095	0.579984
		979	1.11858	-5.75389	1.20071	1.20143	1.20107	8.61306	-4.57304	7.13188	7.11149	7.12169	-4.02665	7.86178	1.05717	0.876591	0.966879
		980	0.460639	0.3359	0.612397	0.617194	0.614795	-1.02687	0.293556	0.234829	0.233701	0.234265	-0.289786	0.363757	0.170784	0.16634	0.168562
		981	-1.31416	3.21752	0.839381	0.830924	0.835153	10.3385	-13.5902	8.31496	4.71965	6.51731	5.22026	-10.298	1.8613	2.3392	2.10025
		982	-3.93409	15.1909	0.587532	0.595933	0.591733	-2.31178	2.37351	2.14439	2.01928	2.08184	7.01603	-16.4305	0.414108	0.504649	0.459378
		983	-7.76695	-0.861482	0.77182	0.92591	0.848865	0.931814	-11.5582	2.94761	3.22027	3.08394	25.714	-10.3385	25.862	20.18	23.021
		984	-9.60174	-10.629	0.510216	0.562604	0.53641	-2.81573	-7.0799	0.396541	0.503249	0.449895	0.805812	0.792877	0.353447	0.448694	0.401071
		985	-9.03525	10.2692	12.2066	8.52596	10.3663	-12.4855	-3.42114	2.17337	2.08977	2.13157	-10.0491	-4.19961	1.51738	1.58108	1.54923
		986	-0.0963758	-0.162844	0.108487	0.103181	0.105834	1.9105	0.0800969	0.262198	0.223429	0.242813	0.975942	1.72398	2.72119	1.41143	2.06631
		987	-0.833109	5.31924	1.08855	1.18194	1.13525	-2.73637	-4.54376	1.5995	1.58121	1.59036	8.76385	-5.53175	3.62168	3.59393	3.6078
		988	8.70904	8.90363	2.80372	3.61996	3.21184	-2.46244	4.04199	0.250387	0.26892	0.259654	-1.35457	3.45108	0.17886	0.190463	0.184661
		989	6.9492	3.95144	0.592616	0.496411	0.544513	6.65466	3.19914	1.52508	1.49096	1.50802	-6.56005	-3.92883	0.148743	0.140017	0.14438
		990	-0.353365	-0.798572	0.319856	0.325656	0.322756	1.48198	-0.625887	0.430048	0.443141	0.436595	2.87145	-2.79369	0.913137	0.920387	0.916762
		991	0.0621314	-1.24278	0.213359	0.196898	0.205128	1.89167	-0.770004	0.375524	0.343281	0.359403	12.7117	0.765384	0.69906	0.625443	0.662252
		992	6.47672	-4.49425	3.49841	6.4776	4.98801	10.4336	-6.71602	0.912566	0.876598	0.894582	8.20536	-6.23775	0.553131	0.528796	0.540963
		993	4.48589	2.13034	0.335047	0.361731	0.348389	-5.85181	3.49636	4.93999	4.17689	4.55844	-6.28996	-7.27677	0.416564	0.51998	0.468272
		994	-0.535076	-0.585536	0.132991	0.126501	0.129746	0.230476	4.09271	1.12983	1.11633	1.12308	2.66185	4.4819	0.394543	0.400216	0.397379
		995	1.84119	3.36931	0.130382	0.130702	0.130542	-0.161175	-4.59199	0.873673	0.820178	0.846925	-74.7091	-83.7735	4.12765	4.36021	4.24393
		996	8.80643	6.61219	0.941518	0.809927	0.875722	-6.46884	-1.16871	0.453041	0.41652	0.434781	-6.68592	-6.91767	0.547504	0.479566	0.513535
		997	5.32755	1.88779	0.426905	0.468255	0.44758	-5.70778	8.93237	0.429113	0.47535	0.452232	-4.9313	12.8725	0.298683	0.31723	0.307956
		998	246.764	-46.2447	18.3767	11.6656	15.0212	-2.98759	0.0541591	2.22363	1.6426	1.93311	-5.94915	-5.74387	6.74451	15.4522	11.0984
		999	-1.2841	-17.587	5.44616	5.79423	5.6202	1.24843	-15.6707	0.459274	0.446053	0.452664	5.35542	-3.45229	0.578837	0.569228	0.574033
		1000	-7.70668	13.6544	0.158956	0.161677	0.160316	-1.44944	1.56141	0.497095	0.578548	0.537822	4.21287	-27.9551	0.42352	0.509965	0.466743
		1001	3.66697	5.93903	2.61046	2.38644	2.49845	1.7521	0.835148	0.838536	0.914061	0.876298	-3.86187	-1.98195	2.1597	3.00222	2.58096
		1002	8.03401	1.76269	10.3217	16.3882	13.355	0.741234	1.33158	0.870007	0.91309	0.891548	-0.547751	-1.18591	0.373881	0.391797	0.382839
		1003	-24.1582	90.6238	1.45125	1.64452	1.54788	-7.36072	3.37732	0.936244	1.37316	1.1547	4.01982	-39.8137	0.974698	1.13477	1.05474
		1004	-3.60488	1.52644	1.87639	1.66148	1.76893	-4.57643	-7.52635	1.61316	1.63707	1.62511	-1.73697	-10.4988	0.222535	0.210749	0.216642
		1005	0.560849	10.9131	0.532106	0.544041	0.538074	1.2877	12.0693	0.292672	0.293393	0.293033	-10.8408	0.137493	1.03277	1.02653	1.02965
		1006	4.63983	14.6874	3.77878	3.26633	3.52255	4.02796	13.7744	0.678953	0.697232	0.688093	-19.1051	-11.508	0.702158	0.553386	0.627772
		1007	2.76617	12.3891	0.200801	0.204286	0.202544	-0.602218	4.26059	0.55389	0.544661	0.549276	-4.63189	-9.2213	0.408373	0.40553	0.406951
		1008	2.08346	-23.7528	0.511897	0.516432	0.514165	3.09986	-20.4031	0.503557	0.490458	0.497007	6.79358	-16.2009	0.627151	0.644252	0.635701
		1009	18.7871	11.4289	0.353098	0.360976	0.357037	6.84716	4.00661	0.377669	0.369373	0.373521	-3.49401	-0.317713	0.27107	0.297681	0.284376
		1010	10.1874	-0.565692	1.05285	0.858142	0.955494	3.84451	0.438485	0.290345	0.257028	0.273687	-1.1123	0.101673	0.232748	0.22539	0.229069
		1011	2.73127	23.2361	0.214455	0.233028	0.223741	-0.730191	6.5464	0.886506	1.16834	1.02742	7.10509	-17.1188	0.379382	0.485163	0.432272
		1012	-0.0586746	-1.1139	0.160264	0.18674	0.173502	-3.19661	0.411919	0.84138	0.844503	0.842942	-3.78166	2.02074	0.523666	0.528511	0.526089
		1013	-2.28361	-1.326	0.158743	0.185858	0.172301	-5.41741	-0.0524145	0.848933	0.855363	0.852148	-6.05464	1.84718	0.524797	0.528421	0.526609
		1014	-1.04593	-18.0516	1.31338	1.83833	1.57585	14.2324	-25.1627	1.04222	1.65778	1.35	12.9678	-6.91271	4.53379	8.63425	6.58402
		1015	13.9964	18.1429	0.296879	0.316018	0.306448	9.30707	10.8215	0.388726	0.400813	0.39477	5.12839	4.35185	0.272761	0.281392	0.277076
		1016	2.88834	0.438391	0.656423	0.746226	0.701324	0.633326	2.40084	0.457298	0.532587	0.494943	-1.125	-1.91977	0.223154	0.242936	0.233045
		1017	3.05097	3.15306	0.357413	0.343485	0.350449	3.71164	0.408575	2.73157	3.123	2.92728	0.713317	-2.01426	0.392857	0.376385	0.384621
		1018	-0.850794	-2.0312	4.08483	3.31888	3.70185	-1.56337	0.086564	0.309237	0.355812	0.332524	-0.0812595	0.768718	0.110244	0.117523	0.113883
		1019	28.8744	42.3792	15.0637	17.8524	16.458	-1.51774	-1.2198	1.44169	1.66119	1.55144	-60.7609	28.3262	31.7878	23.4624	27.6251
		1020	5.62606	13.9658	0.444574	0.473663	0.459118	3.24377	3.56549	0.520027	0.562771	0.541399	-0.317424	-1.87889	0.470431	0.541193	0.505812
		1021	0.463628	3.07103	1.56469	1.55766	1.56118	0.569441	0.516233	1.37497	1.32796	1.35147	0.83391	0.222475	0.396039	0.414137	0.405088
		1022	5.8614	-7.20174	1.9597	1.95777	1.95873	0.00655789	0.521815	0.342092	0.354814	0.348453	3.32437	-12.271	6.01711	6.0985	6.05781
		1023	-21.5393	-18.5991	0.567858	0.485741	0.5268	-13.8743	-11.6217	2.44494	2.08245	2.26369	-20.4833	-17.0843	0.328481	0.284972	0.306727
		1024	-2.37985	-0.189737	4.00427	4.14768	4.07598	-3.89097	12.5321	0.474569	0.505909	0.490239	-7.70303	16.4655	0.533098	0.533896	0.533497
		1025	9.79468	-5.27289	0.289198	0.250483	0.26984	5.94168	-0.612905	0.698844	0.656611	0.677728	-4.14863	7.31326	2.79518	3.40058	3.09788
		1026	8.75839	0.989559	0.790703	0.829819	0.810261	-3.1914	0.435739	3.03292	4.06915	3.55103	-10.1491	-0.682149	0.824072	0.858946	0.841509
		1027	7.49304	26.2011	1.05795	1.18374	1.12085	3.68501	11.5405	0.905809	1.46612	1.18596	-0.319466	-2.81229	0.215608	0.283639	0.249624
		1028	-2.2649	7.09915	3.05344	2.97791	3.01568	-3.95043	10.6896	0.310369	0.35897	0.334669	9.71751	-6.2879	5.78975	2.86375	4.32675
		1029	-1.47746	-0.405739	0.661875	0.681463	0.671669	-9.78603	8.47079	1.70862	1.91251	1.81056	-12.219	7.82663	0.715273	0.731938	0.723605
		1030	3.95653	1.4694	4.22839	5.26795	4.74817	0.356512	-2.06425	0.384919	0.359603	0.372261	-1.66778	1.54973	0.460375	0.450609	0.455492
		1031	12.2815	2.16092	0.239334	0.188893	0.214113	10.5014	2.54472	1.09024	0.914065	1.00215	-7.42471	-1.33039	0.535825	0.464305	0.500065
		1032	-2.09615	4.00962	4.13999	4.19531	4.16765	-0.671343	1.16301	0.740103	0.648735	0.694419	-0.805543	5.1509	2.65282	2.7816	2.71721
		1033	-0.41953	-1.67086	0.758535	0.747051	0.752793	0.750217	0.134319	0.187498	0.188924	0.188211	-0.274954	-0.0998913	0.155836	0.160101	0.157969
		1034	-1.39146	-3.38641	0.277278	0.27226	0.274769	-11.3551	-8.09102	2.75749	3.32723	3.04236	9.83032	4.7116	0.961375	1.01251	0.986944
		1035	-6.00487	-9.55243	1.09612	1.1645	1.13031	-7.11873	-7.82692	1.66453	1.72417	1.69435	-5.39378	-9.26172	2.13296	1.81195	1.97246
		1036	-3.32882	-9.72547	8.89734	10.5653	9.73134	-3.31386	-5.32707	0.534845	0.498142	0.516493	-2.24866	-7.78753	0.690103	0.692738	0.69142
		1037	1.59008	-2.94921	10.333	12.7806	11.5568	-0.313524	-0.205323	0.203825	0.245154	0.22449	227.788	77.2785	31.3642	13.2996	22.3319
		1038	9.60516	2.03361	0.529846	0.542236	0.536041	2.47382	-0.521845	0.165724	0.172173	0.168949	0.540676	-0.377069	0.0934645	0.0945568	0.0940106
		1039	1.56811	0.497326	1.17505	0.980768	1.07791	-0.762657	-0.409242	0.194262	0.180473	0.187368	1.03213	-0.95939	0.20423	0.181316	0.192773
		1040	-4.06276	3.68709	3.56217	3.81149	3.68683	-1.03913	0.316454	0.869962	0.940228	0.905095	-0.727541	-0.133863	0.493092	0.554039	0.523566
		1041	1.86613	-2.16912	0.951185	1.03137	0.991279	-1.38303	0.481207	0.419148	0.449293	0.434221	4.1761	-1.2746	0.508925	0.526255	0.51759
		1042	-1.28509	-0.306484	0.660184	0.713409	0.686797	-1.32888	1.8325	2.04459	2.12356	2.08407	-2.6888	-10.6432	0.751103	0.849783	0.800443
		1043	2.23318	-0.0625285	0.306994	0.316742	0.311868	2.37409	1.52776	1.01637	1.13446	1.07542	-7.62548	-2.93147	0.245931	0.295036	0.270484
		1044	-8.09447	1.58812	9.59502	7.36527	8.48014	4.0203	0.173111	4.219	4.56606	4.39253	0.339217	-5.04923	0.895045	0.988855	0.94195
		1045	-0.0389357	1.28935	0.279543	0.277681	0.278612	-1.30121	1.23541	0.430639	0.441578	0.436109	-0.729005	2.49779	0.787582	0.935998	0.86179
		1046	9.28977	-120.741	1.57008	1.82932	1.6997	11.0136	-116.069	0.640836	0.694392	0.667614	10.8281	-111.749	0.671611	0.74935	0.71048
		1047	10.1736	0.122673	5.91108	5.0187	5.46489	0.42712	1.63769	0.67668	0.682485	0.679582	-2.15747	-0.694679	0.158376	0.165032	0.161704
		1048	89.1751	179.653	36.2848	42.6573	39.4711	-17.7969	20.3238	2.26602	2.1192	2.19261	-23.1017	19.0138	0.605146	0.569129	0.587137
		1049	1.71719	5.0825	0.198035	0.179801	0.188918	4.64138	-4.25318	0.475366	0.398901	0.437133	19.5513	-13.0936	0.764705	0.689729	0.727217
		1050	-3.58193	0.860476	0.218885	0.224192	0.221539	-1.35576	0.218954	0.146791	0.136585	0.141688	1.07757	-0.662329	0.0850194	0.0794337	0.0822266
		1051	2.88063	0.558754	1.27656	1.45495	1.36575	-0.417247	-1.18177	0.257049	0.251486	0.254267	-0.707556	0.661432	0.457952	0.463164	0.460558
		1052	1.06483	-10.7273	2.94482	2.93723	2.94102	3.52273	-4.03807	1.65237	1.90564	1.779	-17.4341	10.0069	2.3245	1.91298	2.11874
		1053	2.70183	0.931447	0.775154	0.782664	0.778909	1.13864	0.338703	0.246245	0.254827	0.250536	-1.10677	-0.59736	0.190352	0.188248	0.1893
		1054	0.568448	0.129641	0.321464	0.303773	0.312619	-0.686189	-0.251976	0.145702	0.140389	0.143046	-0.630617	1.09612	0.159512	0.15393	0.156721
		1055	-3.55715	6.98349	0.781359	0.722858	0.752108	-2.62343	6.03842	0.419251	0.434504	0.426877	2.58472	-0.587381	0.51646	0.511778	0.514119
		1056	-7.01307	-1.02336	0.63992	0.558674	0.599297	7.20361	3.30857	0.970961	0.663375	0.817168	11.7254	1.25367	0.162732	0.111315	0.137023
		1057	5.52017	-5.85993	0.913584	0.782472	0.848028	-5.43053	3.47723	3.4414	3.03239	3.23689	-14.4799	16.7606	0.390064	0.393136	0.3916
		1058	-11.3474	4.81545	3.14538	2.47324	2.80931	-9.29435	-6.28273	4.9289	5.60968	5.26929	-13.2497	-12.7147	0.167218	0.141098	0.154158
		1059	-1.92737	-2.17635	0.593726	0.483095	0.538411	-5.36648	-0.506761	0.310358	0.306184	0.308271	-16.3123	16.1863	1.82801	1.87946	1.85373
		1060	-0.213268	-12.187	0.427737	0.389451	0.408594	-1.92287	-5.39657	0.316428	0.368984	0.342706	1.0991	5.17942	0.19624	0.212152	0.204196
		1061	-0.520912	-1.47418	0.246058	0.291457	0.268758	-0.215043	-0.893241	0.151366	0.18426	0.167813	-1.59554	-0.119241	0.381245	0.47454	0.427892
		1062	-101.78	38.6389	1.60848	1.41183	1.51015	40.7767	-25.9694	2.62251	2.90882	2.76567	54.8025	-0.548818	1.19952	1.41737	1.30845
		1063	-1.91516	-2.41638	4.06023	4.29811	4.17917	4.98414	-7.79713	1.04939	1.45533	1.25236	-1.58693	-1.01425	0.773389	0.913615	0.843502
		1064	5.45194	-13.6035	0.317918	0.355318	0.336618	-7.20188	3.13614	1.51785	1.7557	1.63678	-14.3683	15.2643	0.583052	0.641332	0.612192
		1065	12.0469	4.10333	1.11771	1.04049	1.0791	8.47496	0.463819	0.65551	0.689741	0.672626	8.50185	0.704034	0.697517	0.771031	0.734274
		1066	16.2374	8.09494	4.99967	5.60121	5.30044	8.30038	1.09999	1.78929	2.10663	1.94796	0.0203627	3.8884	1.57099	1.82517	1.69808
		1067	-14.4021	-0.806155	0.66269	0.639468	0.651079	-11.5146	-3.93564	2.32683	2.53418	2.43051	2.48126	-3.67589	0.669591	0.815263	0.742427
		1068	6.24464	-11.2164	0.232285	0.233754	0.23302	0.809241	-1.7699	1.03801	1.1051	1.07156	-2.26016	-0.725082	0.270398	0.290707	0.280553
		1069	0.121007	0.00771693	1.76731	1.58242	1.67486	6.84009	-0.812285	1.9618	1.94738	1.95459	11.0879	-2.38566	0.242101	0.221806	0.231953
		1070	30.487	-39.9686	1.07432	1.18271	1.12851	32.3542	-36.2174	1.80208	1.76927	1.78567	13.0469	-22.2979	2.66222	2.8645	2.76336
		1071	8.86706	8.46877	0.778566	0.881052	0.829809	4.43113	4.09778	0.736644	0.782543	0.759593	2.48228	2.50768	0.593753	0.608804	0.601278
		1072	-4.31109	4.92463	0.642162	0.532552	0.587357	3.09837	-0.261184	0.980661	0.806282	0.893472	-1.83628	-1.99299	0.316896	0.275578	0.296237
		1073	5.21602	-9.42197	5.01302	3.16157	4.0873	4.79299	-9.95788	4.51942	4.11869	4.31905	-7.5303	9.69063	3.12843	2.0341	2.58126
		1074	-25.8104	5.9111	16.2884	16.8505	16.5695	17.4495	-16.0533	6.48252	7.32298	6.90275	11.6869	-10.1766	1.27843	1.41504	1.34674
		1075	-0.756158	-2.7913	0.366925	0.413225	0.390075	-1.97108	4.60037	1.0768	1.24976	1.16328	-5.29765	1.17221	0.37185	0.401586	0.386718
		1076	0.449398	-7.69331	1.82685	1.52389	1.67537	1.13326	-1.51027	1.36047	1.28232	1.3214	-3.05825	2.45549	0.205318	0.177959	0.191638
		1077	12.6997	-1.37083	1.78118	2.76714	2.27416	10.3054	-5.01036	0.408025	0.951707	0.679866	16.5599	9.47479	0.408249	0.666436	0.537342
		1078	-0.461621	-0.398907	0.443687	0.43378	0.438733	1.3734	2.71962	0.948904	0.981996	0.96545	2.35237	3.49766	0.269582	0.260441	0.265012
		1079	-4.21006	10.3463	4.18951	4.47898	4.33424	0.418738	20.0474	0.858181	0.877044	0.867613	13.4657	0.866156	16.4653	14.4163	15.4408
		1080	-3.15617	-0.561781	4.18041	4.47239	4.3264	1.97552	9.08447	0.858147	0.877137	0.867642	14.3585	-9.59896	16.6512	15.353	16.0021
		1081	-4.91708	4.79713	0.54152	0.505395	0.523457	-3.98878	9.78585	5.85227	5.72346	5.78786	6.25339	-7.25223	0.354581	0.335248	0.344915
		1082	-4.0222	0.0429118	3.08671	3.03849	3.0626	-5.96677	-4.63101	0.720649	0.751668	0.736158	-8.73898	-2.79482	0.302072	0.311844	0.306958
		1083	245.239	82.2838	3.56708	2.45837	3.01273	-23.2183	-2.58472	0.651018	0.586366	0.618692	-25.9304	-0.196834	1.33306	1.28203	1.30755
		1084	0.318181	3.43854	0.703937	0.738809	0.721373	1.42721	3.2844	0.406112	0.442155	0.424133	1.26643	3.9822	0.553459	0.603658	0.578559
		1085	-26.7143	31.1556	0.418989	0.461866	0.440427	-20.52	24.8346	0.545163	0.631987	0.588575	0.866536	-11.5304	1.63608	1.96792	1.802
		1086	-0.411355	2.66565	0.416033	0.408215	0.412124	-0.499222	2.04982	0.259829	0.256977	0.258403	-3.44841	5.01585	0.338029	0.345432	0.341731
		1087	-1.39447	-7.78509	0.512124	0.527104	0.519614	-3.81992	-0.0917862	6.9093	4.95072	5.93001	23.1276	4.15434	4.09078	5.66519	4.87799
		1088	-19.4644	19.6885	0.320926	0.354064	0.337495	-11.0722	4.2636	1.82204	1.11361	1.46782	-11.4767	-11.3114	3.45639	1.86622	2.66131
		1089	19.2798	74.6456	10.0378	10.4984	10.2681	14.0611	57.8674	12.7424	13.0824	12.9124	-17.5735	-87.337	35.147	40.0756	37.6113
		1090	-7.85521	2.69465	1.255	1.28744	1.27122	0.976727	-1.49698	1.73034	1.78642	1.75838	16.6934	-16.9566	0.164678	0.167955	0.166317
		1091	-22.3985	18.5936	0.398061	0.403418	0.40074	-21.661	17.7757	0.242179	0.228559	0.235369	-20.0347	16.1704	0.487879	0.463012	0.475446
		1092	2.62837	-3.66764	0.220983	0.239807	0.230395	1.89064	-3.91577	0.205021	0.225078	0.21505	2.7779	-1.33419	0.517743	0.519516	0.518629
		1093	-4.43706	10.28	0.579558	0.608176	0.593867	3.33355	3.8846	0.652381	0.70179	0.677086	0.00864132	-9.19302	0.540708	0.576921	0.558814
		1094	-8.48912	-7.39014	0.382595	0.367858	0.375226	3.45771	1.26298	1.01659	0.984824	1.0007	5.66105	8.59294	0.202949	0.196571	0.19976
		1095	0.763107	0.284072	0.118908	0.12662	0.122764	-0.805381	-2.96824	0.323391	0.322363	0.322877	4.19388	-6.87237	0.509594	0.588628	0.549111
		1096	3.87764	1.12057	0.720959	0.719513	0.720236	-5.72563	2.71471	0.505139	0.508437	0.506788	-15.3712	5.9398	0.40688	0.422853	0.414867
		1097	26.0531	-5.86701	0.514922	0.469193	0.492058	14.6256	0.964713	0.803407	0.702267	0.752837	5.22519	5.70162	0.291429	0.243779	0.267604
		1098	1.23687	1.1101	3.18574	2.52179	2.85376	0.886972	2.38653	0.998371	1.03537	1.01687	0.794237	0.0669505	0.180785	0.200157	0.190471
		1099	-4.25891	-4.23277	0.562939	0.50256	0.53275	-1.09612	-3.62663	0.15482	0.14352	0.14917	4.39318	-9.37724	1.6089	1.68253	1.64572
		1100	0.588495	-2.77955	1.25932	1.54574	1.40253	0.972033	1.96539	0.765249	0.820566	0.792908	-1.63248	4.88589	0.329924	0.350492	0.340208
		1101	1.43543	0.867375	0.51154	0.559755	0.535648	-1.35205	0.442576	0.427366	0.465884	0.446625	-1.63823	-0.46879	0.195247	0.236333	0.21579
		1102	3.84546	4.06995	2.76573	3.39866	3.08219	0.645673	1.67483	0.479376	0.525985	0.50268	-0.409104	0.0277455	0.309315	0.349414	0.329365
		1103	-5.31177	5.76542	0.522411	0.489154	0.505783	-3.3514	6.95689	0.322209	0.317238	0.319723	11.9436	8.75554	3.98535	4.32571	4.15553
		1104	-2.20566	7.04412	0.334145	0.309418	0.321782	-1.63624	-1.41811	0.824132	0.826272	0.825202	3.58354	-5.41683	0.259582	0.279891	0.269737
		1105	0.944282	5.42346	12.0301	15.9566	13.9934	-7.46462	-3.63278	0.973591	0.845463	0.909527	-25.6886	-12.2539	14.5003	18.4403	16.4703
		1106	16.4304	10.088	5.03247	4.15943	4.59595	0.128486	-0.815199	1.21811	1.07843	1.14827	1.20751	0.871546	1.12899	1.01252	1.07075
		1107	1.44443	-2.99923	0.29178	0.303054	0.297417	1.57094	-2.30392	0.124042	0.125109	0.124576	-0.416826	1.33624	0.212362	0.212747	0.212555
		1108	2.92901	-9.32055	0.207261	0.225647	0.216454	1.66958	-8.78164	1.36277	1.60382	1.4833	-5.61735	4.40253	0.551974	0.5739	0.562937
		1109	-13.2946	-1.13926	0.588849	0.633158	0.611003	6.17975	2.38094	2.38489	2.3637	2.37429	11.7854	-1.28044	0.529474	0.518748	0.524111
		1110	11.776	-5.12686	0.743819	0.690523	0.717171	8.68798	-1.45757	0.793286	0.72067	0.756978	2.61669	-0.60341	0.218069	0.197883	0.207976
		1111	1.19739	0.373626	0.145159	0.142501	0.14383	0.934966	-0.667629	0.741481	0.69196	0.71672	6.7612	-12.9841	1.03393	0.977538	1.00573
		1112	-1.35188	-15.8479	2.70581	3.23938	2.97259	-1.09048	-14.6198	0.858943	1.05154	0.955241	-0.161938	-12.9437	0.553146	0.672316	0.612731
		1113	-7.34794	-3.64661	0.31178	0.320547	0.316164	0.605806	-2.33295	0.303904	0.291477	0.29769	15.3816	3.42675	0.464056	0.472918	0.468487
		1114	7.56664	-5.51158	1.47978	1.89643	1.68811	4.84928	-10.3908	0.352547	0.387559	0.370053	4.67919	-11.5656	0.320006	0.3408	0.330403
		1115	-0.269416	12.6256	13.2676	13.3941	13.3308	-10.4219	9.8519	2.35403	2.63129	2.49266	-19.3274	17.8452	1.15919	1.16822	1.16371
		1116	-3.95422	-7.53805	0.531188	0.487403	0.509295	3.84969	-10.0117	3.54779	3.54006	3.54393	-1.22983	2.26383	0.226115	0.226722	0.226419
		1117	-26.7854	10.6887	0.805773	0.583071	0.694422	-27.2375	6.59647	8.13512	4.499	6.31706	-22.7942	2.72479	0.262642	0.228996	0.245819
		1118	-4.10065	2.78083	1.18855	0.991872	1.09021	-1.10475	1.32755	2.87863	2.45458	2.66661	-29.7279	5.94429	36.8619	11.9714	24.4167
		1119	0.895501	-23.6998	0.601498	0.647194	0.624346	1.15092	-15.9567	0.578208	0.647748	0.612978	2.30376	1.54662	0.293772	0.276305	0.285038
		1120	-12.5204	-12.9683	0	0	0	1.76535	-6.94348	0.902178	0.954039	0.928109	1.05731	-5.77785	0.403535	0.403469	0.403502
		1121	105.058	134.108	7.19981	4.7939	5.99685	124.707	131.753	1.63511	1.72086	1.67798	-84.8277	-93.7951	0.911835	0.750371	0.831103
		1122	-30.3816	-76.2123	2.37982	3.12587	2.75285	-11.31	-34.9322	1.77887	2.28621	2.03254	71.1622	136.705	9.41184	10.123	9.76743
		1123	0.138967	4.30884	6.13268	9.53276	7.83272	3.34351	-8.50697	0.915812	1.05755	0.986681	-0.48294	9.0103	3.44564	4.09721	3.77143
		1124	-3.26708	8.827	0.233004	0.186571	0.209788	-2.73141	1.99479	0.261086	0.24029	0.250688	-11.5241	2.28724	0.694482	0.677874	0.686178
		1125	1.91419	-1.01049	1.63418	1.53031	1.58225	-0.611714	-0.538376	0.150021	0.155018	0.152519	2.5115	0.0962649	0.231234	0.234331	0.232782
		1126	19.5246	1.22673	0.447906	0.378063	0.412985	21.3236	1.36195	0.588054	0.507253	0.547654	-14.1389	-0.787996	4.53839	2.74828	3.64333
		1127	-1.42349	-4.75023	0.730839	0.750698	0.740769	0.304808	0.925431	0.461811	0.475394	0.468603	2.86174	2.09005	0.454552	0.456472	0.455512
		1128	-9.40037	-6.02139	9.16856	7.45348	8.31102	-4.75681	4.7715	1.41014	1.25278	1.33146	-4.73688	3.52805	0.898808	0.86388	0.881344
		1129	4.6539	15.0225	8.08925	7.51517	7.80221	5.52059	9.93693	0.850879	0.859886	0.855382	1.1917	9.75497	0.616366	0.693685	0.655026
		1130	4.9893	-10.8247	0.219119	0.243754	0.231436	6.1336	-9.7987	0.398573	0.413955	0.406264	8.34715	-4.74191	0.194637	0.220554	0.207595
		1131	-11.3086	11.0859	0.387456	0.421686	0.404571	-9.08833	7.65185	1.37505	1.73314	1.55409	-7.97396	17.6889	2.80391	4.37087	3.58739
		1132	-5.67331	-18.0647	0.37885	0.381636	0.380243	-8.96397	-15.3569	0.978412	1.02135	0.999883	7.05453	-21.0996	1.572	1.59726	1.58463
		1133	17.3318	-1.48418	2.20788	2.17303	2.19046	5.75856	-1.6257	0.431304	0.385068	0.408186	4.50139	-1.94597	0.369044	0.32124	0.345142
		1134	-7.52565	2.01434	0.682897	0.665509	0.674203	-7.74241	-4.33799	2.68623	2.68184	2.68404	-9.86123	0.0314037	10.2112	5.85183	8.03152
		1135	-6.78399	-9.07678	0.503138	0.51738	0.510259	-4.09913	-6.20617	0.137845	0.199533	0.168689	0.180345	-4.82014	0.277618	0.41443	0.346024
		1136	7.32443	-1.27296	6.883	9.28102	8.08201	0.567903	-0.0562698	0.590366	0.604973	0.59767	0.146212	0.233326	0.493339	0.539287	0.516313
		1137	-1.57564	-0.631922	0.521271	0.566648	0.54396	-2.84457	1.29424	1.10517	1.17605	1.14061	-1.16907	0.540515	1.10654	1.14819	1.12736
		1138	-3.60483	-11.6134	0.503125	0.518746	0.510935	-1.9072	-1.922	0.835223	0.903916	0.86957	6.84605	2.73959	0.444367	0.445576	0.444971
		1139	-2.23956	-2.92648	0.64541	0.639174	0.642292	0.601334	9.84867	4.77685	4.48533	4.63109	-0.421335	0.699154	0.765208	0.68531	0.725259
		1140	-0.362768	7.05851	0.346327	0.36969	0.358008	1.56151	-3.57196	0.591074	0.637763	0.614418	4.24127	-6.85068	0.208801	0.217982	0.213391
		1141	8.54251	4.44741	2.03426	1.72612	1.88019	2.86656	-0.483212	0.471967	0.46062	0.466293	-0.490036	-0.67907	0.967577	1.00603	0.986802
		1142	-7.84829	6.56021	0.256108	0.26344	0.259774	-1.86265	7.17613	0.588815	0.617823	0.603319	6.9638	-9.50035	0.249414	0.271255	0.260335
		1143	0.0230331	-21.7909	0.618475	0.764249	0.691362	6.8151	-24.1663	0.6092	0.801154	0.705177	9.32409	-28.1154	2.03639	2.77696	2.40667
		1144	-4.63788	4.52673	0.250296	0.286894	0.268595	-3.75639	2.77611	0.559068	0.601272	0.58017	0.516637	0.457588	0.31044	0.376092	0.343266
		1145	-5.05008	-1.48976	2.22128	2.22176	2.22152	-3.69604	1.51689	0.297409	0.291702	0.294556	4.62157	-1.70612	0.492517	0.488345	0.490431
		1146	-4.24811	3.35107	0.857438	0.662569	0.760004	11.6273	1.99738	0.854304	0.702895	0.7786	20.1015	0.0814866	0.230266	0.195466	0.212866
		1147	-13.2082	7.93743	0.553454	0.566123	0.559789	-3.67177	2.0391	2.89733	3.0688	2.98306	10.7862	-1.57834	0.926622	0.961546	0.944084
		1148	3.05955	-7.61595	0.383786	0.391627	0.387707	4.69875	-8.6599	0.489458	0.489519	0.489489	-8.0494	-11.2195	0.440093	0.463632	0.451862
		1149	-0.468844	-1.1098	0.246859	0.26838	0.25762	-0.328662	-1.57926	0.22232	0.244981	0.23365	-3.34775	-0.862388	0.859242	0.704651	0.781947
		1150	3.76035	0.638029	0.198273	0.165727	0.182	4.44579	-3.45875	0.390241	0.366622	0.378431	6.46728	-8.11045	0.537229	0.51258	0.524905
		1151	-94.9061	10.7895	50.2765	32.3751	41.3258	-31.8329	-24.2588	3.5906	4.60071	4.09565	-31.3788	-22.117	1.18246	1.54433	1.36339
		1152	-3.97124	5.26895	1.38981	1.36206	1.37594	-3.369	3.22773	0.526919	0.54543	0.536174	1.69073	-4.38107	0.57742	0.600181	0.588801
		1153	5.25101	-5.21647	2.51174	2.21581	2.36378	3.30982	0.322624	1.47682	1.35954	1.41818	4.35686	-2.55657	1.85631	1.70396	1.78013
		1154	6.6534	-4.96014	6.68019	5.10767	5.89393	-2.76947	3.58318	0.507024	0.473039	0.490032	-17.3999	-18.4564	9.94396	7.2859	8.61493
		1155	52.7433	-2.233	0.515673	0.573459	0.544566	37.5239	-19.6155	0.396112	0.430275	0.413193	-95.1632	185.304	2.79963	4.74031	3.76997
		1156	0.431578	6.16978	0.241172	0.323825	0.282499	0.0601071	-0.818664	0.246781	0.313682	0.280231	-1.94401	-6.65142	0.516041	0.639167	0.577604
		1157	11.0593	6.81018	3.90692	5.63376	4.77034	-2.45507	1.80728	0.462992	0.475911	0.469451	-1.90611	-1.29426	0.297218	0.30477	0.300994
		1158	0.794799	-4.03917	0.40663	0.38454	0.395585	3.90405	-3.41791	0.648702	0.645444	0.647073	-0.0743735	-0.522298	0.260419	0.267548	0.263983
		1159	15.922	-5.6305	6.97718	6.45049	6.71384	1.89407	1.10987	1.3899	1.36447	1.37719	-2.68011	0.899774	0.505405	0.512152	0.508779
		1160	71.6659	1.25554	5.13632	4.07057	4.60344	67.7396	7.65393	6.56785	6.50307	6.53546	66.4396	13.7878	1.64765	1.25143	1.44954
		1161	11.7742	2.2045	2.77743	3.05945	2.91844	-5.36201	-0.85976	0.273851	0.283119	0.278485	-0.879285	-0.0725968	0.311507	0.341186	0.326346
		1162	15.391	-2.12858	3.14723	3.48084	3.31403	9.44061	4.51373	1.95313	1.77671	1.86492	-0.913978	0.334846	0.34428	0.301159	0.322719
		1163	13.0872	4.79559	0.876217	0.926082	0.901149	11.1378	2.80339	0.628657	0.635217	0.631937	11.0799	2.9963	0.386319	0.357442	0.371881
		1164	3.4892	8.23063	0.630856	0.816818	0.723837	0.760947	0.041486	0.486539	0.613297	0.549918	-4.44201	-0.908483	0.136937	0.135371	0.136154
		1165	16.7729	21.3214	2.27124	2.62529	2.44826	10.7108	7.63725	3.94657	4.44285	4.19471	-3.2253	10.3935	2.96984	3.32644	3.14814
		1166	-6.40264	-3.26669	0.752446	0.640474	0.69646	-4.77241	-2.1705	0.41313	0.4031	0.408115	-0.853613	-0.533875	0.223897	0.229569	0.226733
		1167	10.1975	7.55638	1.50733	1.43419	1.47076	-2.19187	-1.27273	0.320477	0.310638	0.315558	-0.328095	0.226801	0.169253	0.163204	0.166229
		1168	-7.13258	6.57306	2.47878	2.73328	2.60603	-6.06374	-6.44793	4.27863	3.88288	4.08075	-0.325667	-17.4137	0.379589	0.437619	0.408604
		1169	-12.4262	-1.45743	0.255098	0.2392	0.247149	1.12199	0.403814	0.401116	0.340053	0.370585	-1.62982	-2.08878	0.214038	0.20186	0.207949
		1170	4.12159	9.3188	1.31399	1.5284	1.4212	2.90779	1.46414	0.332992	0.369838	0.351415	0.55398	0.768862	0.146203	0.168755	0.157479
		1171	5.47408	3.20418	0.697355	0.645675	0.671515	-3.67168	-3.94818	1.17842	1.12164	1.15003	-5.63478	-5.29837	0.322685	0.327668	0.325176
		1172	6.63698	11.0158	5.84878	6.29654	6.07266	-7.53813	5.37662	0.426809	0.381775	0.404292	-12.2092	8.13432	1.01313	0.948172	0.98065
		1173	4.78135	22.6283	1.69963	2.13529	1.91746	4.02864	24.5055	0.11334	0.122964	0.118152	3.9147	21.9862	0.159065	0.184542	0.171803
		1174	10.3474	36.1163	1.90096	2.0111	1.95603	2.20066	-33.0962	3.96553	5.6484	4.80696	-6.74253	-39.2623	0.204756	0.252034	0.228395
		1175	5.20575	2.54037	1.06002	0.953121	1.00657	-5.70028	-3.73791	1.56496	1.35895	1.46195	-0.47783	-0.30585	0.246488	0.236106	0.241297
		1176	1.20722	-0.827279	1.87488	2.11053	1.9927	0.0460709	-0.812629	0.48928	0.511596	0.500438	-0.326518	-0.51783	0.201476	0.219843	0.210659
		1177	-2.46114	1.48224	0.158166	0.167818	0.162992	-0.657455	-0.761784	0.100148	0.10894	0.104544	0.50369	-0.293952	0.0804722	0.0858306	0.0831514
		1178	-24.344	-27.8849	35.1538	6.67861	20.9162	-0.489815	-2.71357	0.828862	1.23343	1.03115	-0.176409	-3.75142	0.197735	0.200839	0.199287
		1179	-21.7617	25.7745	7.40187	6.42466	6.91327	-29.1657	34.7428	2.51383	2.25106	2.38245	-27.4679	34.3537	0.676531	0.754893	0.715712
		1180	10.6788	52.2021	1.09217	2.24877	1.67047	-1.89417	73.8581	0.515885	0.850245	0.683065	-9.493	72.648	0.36071	0.599704	0.480207
		1181	-7.88405	23.9751	2.9651	3.42067	3.19288	-1.85311	-13.0019	0.286661	0.34224	0.31445	3.89551	-14.4191	0.375391	0.435091	0.405241
		1182	31.8064	-2.40387	18.4648	10.6209	14.5428	15.2138	-6.72977	1.09618	1.13176	1.11397	9.22772	-4.42084	0.406375	0.419291	0.412833
		1183	-9.03598	22.8174	0.986659	0.848437	0.917548	-6.20659	7.03388	0.462303	0.497493	0.479898	-2.86673	-6.48395	0.141735	0.158595	0.150165
		1184	-31.3514	1.35732	2.06323	1.75987	1.91155	-27.6146	0.616669	0.927673	0.801879	0.864776	-25.6596	1.36924	0.766568	0.662397	0.714482
		1185	0.0810985	0.112831	0.222216	0.232127	0.227172	-2.4612	2.10135	0.474103	0.48188	0.477992	-8.59531	16.8586	9.62054	11.7354	10.678
		1186	-5.81086	2.18042	0.745369	0.67242	0.708894	-3.751	4.23729	0.402236	0.36122	0.381728	2.41423	-3.9761	0.4649	0.493679	0.479289
		1187	-1.80627	7.80272	1.23512	1.45003	1.34258	8.7354	-9.31985	1.78493	2.00953	1.89723	10.9539	-18.7834	1.15377	1.43044	1.2921
		1188	-11.8002	7.15297	1.09274	1.13097	1.11186	7.64469	-9.94914	11.7172	9.1163	10.4167	4.45975	-1.30207	0.807907	0.795919	0.801913
		1189	-10.2754	-19.8433	20.7499	32.2047	26.4773	-4.57153	6.27488	3.87251	3.54218	3.70734	0.649518	-0.548083	0.890172	0.785718	0.837945
		1190	0.523613	-5.75681	2.47432	2.34447	2.40939	-0.0608418	0.114369	0.371555	0.345006	0.35828	-5.40209	-5.72363	8.64193	8.1136	8.37776
		1191	-45.1621	-14.829	6.75474	4.65074	5.70274	-53.4681	-15.5199	1.04486	1.0429	1.04388	-42.137	-10.877	0.594715	0.505336	0.550026
		1192	-1.02331	13.6495	0.766339	0.730488	0.748414	-5.47432	12.3263	11.6357	9.05575	10.3457	-12.2796	-9.27038	1.04368	1.10452	1.0741
		1193	3.59356	0.777805	0.868618	0.85904	0.863829	1.31468	0.966831	0.273915	0.257555	0.265735	-12.3838	-18.1399	3.67372	5.37801	4.52586
		1194	-6.68289	3.17781	0.291831	0.2817	0.286766	5.28883	7.93389	0.852893	0.86795	0.860422	3.91149	-5.02314	0.353065	0.378366	0.365716
		1195	5.57462	-0.914746	0.198506	0.186806	0.192656	-0.339148	-20.4871	0.440989	0.473576	0.457283	-85.0293	59.9725	1.00786	0.982921	0.995388
		1196	-3.42774	10.6328	0.233313	0.191738	0.212526	1.52259	-0.443122	0.175573	0.153077	0.164325	5.999	-11.6127	0.602664	0.633477	0.61807
		1197	-3.33204	3.06562	0.234388	0.225675	0.230031	-3.3293	2.41032	3.41127	3.55714	3.4842	-14.0033	11.7929	0.461169	0.459659	0.460414
		1198	7.19281	1.674	0.356106	0.366314	0.36121	1.40951	0.307225	0.195369	0.18922	0.192295	-2.41474	0.382073	0.1694	0.168495	0.168947
		1199	-1.3207	-5.00384	2.2719	2.39495	2.33342	-2.20756	0.621045	0.217852	0.216891	0.217371	2.53465	3.39325	1.97678	1.78263	1.8797
		1200	-7.56746	13.405	1.86482	1.9665	1.91566	-5.38338	4.13782	3.83034	2.84352	3.33693	0.645938	-8.80453	1.64622	1.29346	1.46984
		1201	0.549529	0.726273	0.201842	0.208938	0.20539	1.82598	0.480426	0.460525	0.488305	0.474415	0.0175229	3.16594	1.78377	1.77702	1.7804
		1202	-1.76818	-1.52765	0.862225	0.902723	0.882474	-1.86386	-1.80915	0.218764	0.216318	0.217541	3.64258	1.39763	0.832008	0.759108	0.795558
		1203	-6.73016	-3.43277	0.551046	0.48553	0.518288	2.12148	-1.08127	1.60318	1.66647	1.63482	7.8826	-0.0845769	0.345041	0.350898	0.347969
		1204	1.61185	-11.3697	9.95906	11.9651	10.9621	2.39428	-0.108869	1.201	1.28193	1.24147	1.67002	0.574854	0.708987	0.706832	0.707909
		1205	-23.3536	0.764283	1.48657	1.29493	1.39075	-25.7078	0.528065	1.06328	0.915929	0.989603	-28.2639	-1.8276	0.700192	0.535	0.617596
		1206	12.9214	-8.21515	0.132084	0.158396	0.14524	13.1694	-7.75017	0.141195	0.140541	0.140868	17.0603	-5.9422	0.128641	0.147523	0.138082
		1207	0.766372	13.569	0.209103	0.234326	0.221714	-1.60629	12.7213	0.704002	0.740547	0.722275	-6.90021	-5.57507	0.584238	0.657274	0.620756
		1208	-0.633229	-6.27797	0.807182	0.847954	0.827568	0.867324	-7.52615	1.86925	1.79947	1.83436	-19.7492	-18.4818	9.21986	10.3617	9.79076
		1209	1.07432	0.808901	1.00081	1.01595	1.00838	0.630697	-0.213356	0.25733	0.252674	0.255002	-0.0413936	0.00989895	0.130566	0.125208	0.127887
		1210	0.835236	9.35604	5.87155	6.99212	6.43184	3.61085	7.7776	4.87716	4.54606	4.71161	14.3621	16.1629	5.72335	5.59852	5.66093
		1211	-3.74132	-4.57569	0.35166	0.326227	0.338943	-0.6607	-0.931065	0.131854	0.12267	0.127262	0.875585	1.39662	0.300721	0.297192	0.298956
		1212	32.3585	26.9388	1.07376	0.903485	0.98862	31.0789	23.5826	0.355838	0.340989	0.348414	28.7939	21.457	0.55764	0.554095	0.555867
		1213	-7.09325	12.9686	6.07721	5.08736	5.58228	-27.5301	-4.69101	20.8605	11.2655	16.063	-9.34382	-0.547902	4.23279	3.31153	3.77216
		1214	6.67427	1.57208	2.01393	2.10337	2.05865	-8.68648	-1.34398	1.20113	1.05945	1.13029	-4.34448	-0.659762	0.445226	0.383836	0.414531
		1215	33.7599	33.5665	0.492173	0.4574	0.474787	-16.6955	-6.00597	5.41779	3.90678	4.66228	-49.9838	-30.3102	2.22515	1.81626	2.0207
		1216	-1.47671	-5.5844	1.3443	1.21025	1.27727	1.07071	1.06213	2.98388	3.01255	2.99821	-8.13004	3.21995	0.721884	0.771322	0.746603
		1217	-1.91361	0.887218	0.251358	0.248772	0.250065	-0.474376	-2.13985	0.736886	0.809557	0.773221	-5.7961	0.612472	1.87857	1.00882	1.4437
		1218	-13.3417	2.17398	7.49447	8.07191	7.78319	-5.42634	-8.49917	0.630612	0.670932	0.650772	-5.56004	-7.53946	1.22223	1.25371	1.23797
		1219	-3.10709	5.21578	0.356479	0.332116	0.344298	3.93098	1.88486	0.760554	0.660959	0.710757	17.7078	4.11637	1.31018	1.29259	1.30138
		1220	6.86384	34.7747	2.74885	4.26054	3.5047	0.988727	31.4494	0.988754	1.95702	1.47289	0.459673	34.4106	1.20557	1.40632	1.30595
		1221	7.91762	-5.70302	0.100428	0.0774049	0.0889164	4.14506	-2.14711	0.200495	0.15986	0.180178	-4.67312	13.1925	0.930159	0.918793	0.924476
		1222	3.21444	-3.43035	0.773046	0.64857	0.710808	5.85787	-4.04089	0.821603	0.801227	0.811415	6.71893	-9.51316	0.565131	0.527048	0.546089
		1223	3.10191	3.12185	0.560996	0.552513	0.556755	-0.298565	0.129326	0.266746	0.265861	0.266304	-0.891505	1.9953	0.575119	0.645473	0.610296
		1224	5.36365	-39.7455	3.35438	3.14185	3.24811	-9.77214	-27.1104	0.539906	0.520452	0.530179	-16.1389	-24.5888	0.534504	0.483776	0.50914
		1225	-8.78204	7.92772	0.884433	0.821711	0.853072	-0.93101	3.97982	0.672891	0.657052	0.664972	-0.366588	-3.93799	0.185621	0.168779	0.1772
		1226	3.23045	6.25869	2.12752	2.0767	2.10211	-3.38102	2.15196	1.08581	1.04803	1.06692	-0.688698	-1.41667	0.670789	0.640502	0.655646
		1227	10.6356	3.1561	1.97983	1.95218	1.96601	12.8338	6.84177	0.196074	0.194284	0.195179	12.9762	6.16711	0.141439	0.138979	0.140209
		1228	-5.71351	23.9573	5.05592	5.44787	5.25189	4.49987	-12.8374	0.555849	0.659894	0.607871	13.0543	-11.2	0.661638	0.733827	0.697732
		1229	-0.164858	0.208517	0.396134	0.423707	0.409921	-6.46934	0.418769	1.72655	1.97905	1.8528	1.07121	2.78966	0.391801	0.363024	0.377413
		1230	4.66553	2.57985	6.86809	6.70475	6.78642	-4.33907	-3.82657	0.769495	0.773166	0.771331	1.62338	2.15854	0.358332	0.370741	0.364536
		1231	-18.5809	5.34232	3.04234	2.97998	3.01116	0.976614	-0.909116	0.729042	0.800546	0.764794	-2.06235	6.18747	0.757056	0.751145	0.7541
		1232	5.67672	6.5369	0.822323	0.700328	0.761325	-3.55986	-0.0672822	2.28	1.86378	2.07189	-2.49389	-5.17183	0.631965	0.655995	0.64398
		1233	5.981	-4.01035	3.01955	3.15395	3.08675	-1.31226	-3.05243	0.406175	0.452519	0.429347	0.314695	5.70371	0.5404	0.549047	0.544724
		1234	3.32951	3.55243	2.40761	2.30496	2.35629	-0.403232	1.05473	0.310057	0.335179	0.322618	-0.16503	0.322628	0.225482	0.24198	0.233731
		1235	-15.4475	6.14441	0.411112	0.356408	0.38376	0.207153	-0.0544716	0.423274	0.407341	0.415308	7.9986	-3.30598	0.202429	0.212209	0.207319
		1236	-1.01553	0.494954	0.174752	0.192033	0.183392	1.32037	-0.716407	0.28291	0.323086	0.302998	2.6257	-1.46783	0.346593	0.401305	0.373949
		1237	-22.6859	-35.5087	5.08269	3.83029	4.45649	-24.7601	-33.3345	1.44871	1.51158	1.48014	-17.4053	-26.2698	0.971428	1.03842	1.00492
		1238	-8.48701	-6.24534	22.0102	10.5132	16.2617	0.0621146	-0.701279	0.929228	0.783006	0.856117	0.569708	-3.27418	0.499974	0.423748	0.461861
		1239	-10.0419	-0.81991	0.374698	0.367747	0.371222	-0.888136	-0.0456023	0.742491	0.754386	0.748438	10.513	-4.36011	0.328656	0.297029	0.312843
		1240	5.41515	19.4164	3.80531	6.94336	5.37433	-0.402263	-1.65754	0.47901	0.699813	0.589411	-7.82134	-15.8465	0.292678	0.420414	0.356546
		1241	-81.6541	2.15074	1.22783	1.31156	1.26969	-82.4235	3.73541	3.13258	1.19707	2.16482	-90.6335	22.0964	1.09306	0.993333	1.0432
		1242	-3.59722	-12.5146	4.07563	3.61715	3.84639	1.66138	-12.5529	0.534229	0.486367	0.510298	-4.06975	-10.1522	0.566041	0.597067	0.581554
		1243	17.6293	9.02529	4.04317	3.67898	3.86107	12.4095	2.51104	1.19184	1.08101	1.13642	8.31753	0.0177961	0.501632	0.383613	0.442622
		1244	16.4786	22.446	2.79192	3.21279	3.00235	5.55302	3.47826	3.76675	4.8095	4.28813	-5.71213	-28.5947	0.796374	0.79117	0.793772
		1245	-4.69504	-7.3652	0.752308	0.80369	0.777999	4.45836	11.8679	0.68732	0.770421	0.728871	10.2869	13.8675	1.02578	1.11191	1.06884
		1246	-8.75006	7.03905	0.332459	0.344076	0.338267	-2.75748	4.69162	0.433459	0.481464	0.457462	5.16119	-0.0750021	1.82991	1.95254	1.89122
		1247	11.2206	0.214471	0.402096	0.406757	0.404426	-7.98229	-0.561116	0.118373	0.134983	0.126678	14.5434	-3.04471	0.213129	0.209539	0.211334
		1248	13.6415	3.14487	0.446561	0.439	0.44278	4.67512	-2.21479	1.84947	1.68873	1.7691	-3.72614	-4.08288	0.377904	0.322415	0.350159
		1249	-2.38604	-3.20509	1.33309	1.17931	1.2562	-15.004	-0.326165	10.3583	10.4255	10.3919	-12.8369	-4.12995	2.93669	2.27482	2.60576
		1250	-1.22117	-2.00882	0.612496	0.580879	0.596687	-1.35745	0.589157	0.190857	0.197872	0.194364	1.96335	4.06022	0.447461	0.446778	0.44712
		1251	14.6481	25.1545	1.62646	2.11937	1.87291	16.8685	24.4218	0.927796	0.912553	0.920175	12.7475	25.2101	0.796527	0.983764	0.890145
		1252	16.3633	-1.42619	6.91205	6.6098	6.76093	15.1961	2.3613	2.13931	2.18618	2.16274	-16.0042	-2.7827	10.8482	9.9042	10.3762
		1253	-2.33523	5.7728	1.36051	1.3392	1.34986	-3.27227	4.6981	0.882357	0.835198	0.858777	-12.24	15.6529	6.8324	4.15837	5.49539
		1254	-3.48228	14.8241	0.579347	0.722424	0.650885	-3.41253	16.1479	0.381628	0.451402	0.416515	-8.52093	18.6925	0.255233	0.264427	0.25983
		1255	-1.06203	-6.6826	4.08427	4.89839	4.49133	-1.7317	-4.30548	1.74382	1.66249	1.70315	-1.94724	-4.51638	0.632252	0.652819	0.642536
		1256	2.23657	2.46612	0.717799	0.759311	0.738555	1.6426	1.7801	0.310672	0.340529	0.3256	-5.2753	-2.79021	1.12998	1.02576	1.07787
		1257	-0.862641	-6.82511	12.0203	7.37533	9.69782	-15.3047	-0.973554	2.36963	2.34597	2.3578	-14.7152	-1.12888	0.79487	0.984389	0.889629
		1258	-0.0373184	2.81907	1.68066	1.75782	1.71924	-3.21775	2.86085	0.447012	0.49197	0.469491	-7.9665	11.9164	5.46634	7.24104	6.35369
		1259	0.622079	-1.45424	1.49578	2.44292	1.96935	0.00316063	-0.189479	0.719968	0.837293	0.77863	-0.0186491	0.267533	0.276165	0.303771	0.289968
		1260	0.137073	2.25452	0.260642	0.282829	0.271735	1.34152	0.204772	0.686276	0.717411	0.701844	0.881238	-10.8243	1.86662	1.81217	1.8394
		1261	-18.7534	17.7127	0.43652	0.691349	0.563934	12.3706	-6.92242	0.789805	0.811708	0.800756	28.4932	-24.9585	0.310289	0.358663	0.334476
		1262	-6.04629	16.4279	0.678814	0.907428	0.793121	8.34472	-4.29954	2.07917	2.95218	2.51567	4.59268	-15.4654	0.37272	0.485877	0.429299
		1263	-0.809406	-4.813	0.210939	0.204079	0.207509	0.996752	-2.56265	0.346059	0.334546	0.340303	1.42374	0.936402	0.275533	0.316366	0.295949
		1264	-133.043	68.7963	0.672927	0.910488	0.791707	-119.438	44.8753	2.09938	3.23466	2.66702	-121.317	37.0359	0.389759	0.513837	0.451798
		1265	3.18768	-3.45436	0.684884	0.478423	0.581653	3.78957	0.753914	0.776786	0.586786	0.681786	10.1079	6.65246	0.368372	0.277644	0.323008
		1266	56.4173	49.2357	0.6533	0.772983	0.713141	48.8646	60.5863	0.309961	0.312651	0.311306	41.5533	58.471	0.44477	0.495633	0.470202
		1267	-54.2078	-152.243	0.552174	0.551529	0.551852	-53.298	-155.153	0.528649	0.517472	0.523061	-54.8196	-162.583	0.286864	0.298652	0.292758
		1268	-1.13582	0.377333	0.234662	0.235199	0.23493	92.0248	3.78316	17.3658	3.28156	10.3237	270.029	17.2865	4.88242	3.68536	4.28389
		1269	-2.44563	-2.44363	3.3751	4.64451	4.00981	0.167574	-1.48734	0.328055	0.317243	0.322649	6.10118	1.62233	0.880575	0.805262	0.842919
		1270	-2.70751	-1.53327	0.185361	0.197111	0.191236	-0.699035	5.89131	2.7596	2.93905	2.84932	16.5375	4.09331	0.590386	0.626731	0.608558
		1271	14.0606	6.77532	0.891233	0.834954	0.863094	-1.11063	1.27622	0.287111	0.280511	0.283811	-12.4047	-5.0475	0.388933	0.433646	0.41129
		1272	-1.37113	0.550447	0.386706	0.460865	0.423786	-2.13096	0.620868	1.2111	1.45206	1.33158	4.90259	3.1637	0.955466	1.01625	0.985856
		1273	19.3667	4.14796	1.83725	1.7851	1.81117	9.2945	1.74181	0.284911	0.267381	0.276146	8.11906	-1.44469	0.234885	0.198281	0.216583
		1274	1.71008	-2.47995	0.522536	0.52375	0.523143	3.48267	5.53226	4.95927	5.48365	5.22146	4.37823	-1.39459	2.37939	2.87832	2.62886
		1275	6.30004	-0.554953	0.475993	0.470214	0.473104	-0.831114	-0.341393	0.111521	0.102239	0.10688	-0.945329	-0.369395	0.129996	0.122735	0.126365
		1276	-6.63066	-2.28965	0.537307	0.648867	0.593087	-0.788382	-0.0900663	0.258314	0.278042	0.268178	-4.08162	9.25122	0.330127	0.349593	0.33986
		1277	-0.407547	-0.12709	0.11408	0.120248	0.117164	3.78129	1.52853	0.357949	0.361826	0.359887	7.90269	5.32517	1.51893	1.57814	1.54854
		1278	2.20553	-2.24221	0.067657	0.0758739	0.0717655	-2.92009	1.84483	0.494117	0.528443	0.51128	-2.85664	1.72471	0.221965	0.225221	0.223593
		1279	-1.42803	-1.00719	1.78332	1.90683	1.84508	-5.98281	-1.50651	0.569694	0.615199	0.592447	-13.3673	-0.752666	3.47514	3.51585	3.49549
		1280	13.792	-29.4632	5.39008	6.71645	6.05326	0.993109	1.54017	0.385911	0.388155	0.387033	0.0912356	1.68133	0.179895	0.176432	0.178164
		1281	7.20109	0.978669	0.513119	0.582005	0.547562	6.09935	-0.486765	0.328445	0.353438	0.340942	0.116211	-6.2059	0.483571	0.415462	0.449516
		1282	9.63836	-1.66062	0.166369	0.167108	0.166739	-4.7614	5.03621	0.813447	0.786854	0.80015	-10.2658	-0.0957374	0.39935	0.407419	0.403384
		1283	-7.66513	2.34678	0.140978	0.128144	0.134561	1.20764	0.350202	0.178308	0.178427	0.178367	13.5633	-5.12258	0.216308	0.215626	0.215967
		1284	14.4654	4.60681	0.190686	0.158404	0.174545	11.5677	3.20734	0.747179	0.608275	0.677727	-10.1101	-6.97307	1.02203	1.04446	1.03324
		1285	2.40658	29.9705	0.418151	0.385568	0.40186	-15.4453	11.2646	0.855511	0.854724	0.855117	-28.2302	7.91144	0.155542	0.143494	0.149518
		1286	-1.43868	-0.628546	0.222551	0.207431	0.214991	1.79239	0.0446314	0.564663	0.536158	0.55041	8.54642	3.18138	1.07238	1.00699	1.03968
		1287	16.2991	2.69001	0.458652	0.510904	0.484778	3.42864	1.56002	1.02206	1.01065	1.01636	-14.3118	-2.57662	0.2733	0.267925	0.270612
		1288	1.09072	1.63754	0.62461	0.62628	0.625445	-1.82024	-0.580448	2.24524	2.04971	2.14747	-1.71281	-0.740555	0.892979	0.85808	0.87553
		1289	-20.1787	-18.4889	9.44138	7.65265	8.54702	-10.571	-9.86703	1.29016	1.30743	1.29879	-11.4597	-12.3546	1.01778	1.10733	1.06256
		1290	-22.7421	-9.62197	4.10748	3.08006	3.59377	-25.1939	-7.69186	0.758746	0.710174	0.73446	-27.4967	-7.78627	0.330907	0.296952	0.313929
		1291	5.51118	33.4538	0.281232	0.256503	0.268867	0.279634	28.7314	0.573022	0.676563	0.624792	8.11346	25.9937	0.800795	1.07812	0.939458
		1292	10.7064	-2.26179	0.51597	0.487602	0.501786	11.8613	2.1854	1.01098	0.963972	0.987478	-7.9516	-0.305782	0.377836	0.380286	0.379061
		1293	-0.408085	0.150346	0.0925065	0.0983019	0.0954042	-1.25846	-1.70808	0.148713	0.157042	0.152878	1.60248	-2.93119	0.229409	0.248198	0.238804
		1294	2.07398	8.43466	0.210579	0.302674	0.256626	4.97252	0.608823	0.268334	0.299472	0.283903	4.54143	-6.48622	0.210209	0.204534	0.207372
		1295	3.16993	-1.50856	1.17403	1.06287	1.11845	-0.984116	4.26117	0.45401	0.399896	0.426953	-0.865988	-1.03921	0.204401	0.208805	0.206603
		1296	-4.27005	6.7773	0.22715	0.240108	0.233629	-0.98367	3.90937	1.09355	1.14466	1.11911	2.23604	-3.68123	0.38553	0.407673	0.396601
		1297	-4.67562	-5.9847	7.76782	5.75075	6.75928	-3.15141	-1.3261	0.740358	0.685134	0.712746	-0.029228	-2.24017	0.218934	0.180615	0.199774
		1298	-4.68919	1.16483	10.7557	6.62711	8.69138	1.28615	2.32855	0.780234	0.839703	0.809968	-0.563381	1.9877	0.54346	0.564677	0.554069
		1299	0.282095	3.56818	0.354342	0.408658	0.3815	2.6186	2.02922	0.414247	0.45116	0.432703	-6.38393	-5.11638	0.303422	0.299346	0.301384
		1300	4.22194	1.09852	0.493746	0.453538	0.473642	0.056632	0.199007	0.115969	0.111768	0.113869	-1.5608	-0.179229	0.148556	0.142057	0.145306
		1301	11.1913	-5.71238	0.256621	0.258144	0.257382	-5.18058	-0.87943	1.34039	1.25072	1.29556	5.76454	11.4408	4.2174	4.65789	4.43764
		1302	-0.23847	-5.05448	0.916244	0.756176	0.83621	1.40372	-1.23564	0.184242	0.166961	0.175601	-1.94394	-0.354354	0.0968194	0.0873552	0.0920873
		1303	-5.42023	4.28374	0.155199	0.159765	0.157482	-0.762899	-1.57322	1.5167	1.43725	1.47698	-10.9103	-11.642	1.68267	1.43848	1.56058
		1304	12.7486	-13.8919	0.377347	0.398925	0.388136	6.159	-1.93096	0.512152	0.505547	0.50885	-3.68982	0.724403	0.188036	0.189068	0.188552
		1305	26.3855	-10.1775	0.528486	0.508231	0.518359	5.49178	-3.43968	1.47591	1.28882	1.38237	42.1744	-24.3719	0.672819	0.615101	0.64396
		1306	0.917632	8.36859	0.77314	0.645672	0.709406	-1.14203	-4.8485	1.84784	1.80605	1.82695	-0.515911	-10.1855	0.250342	0.217972	0.234157
		1307	-0.202877	-1.11712	0.241239	0.259982	0.250611	3.67612	-0.806536	0.236272	0.214034	0.225153	7.57889	-0.691094	0.201546	0.156892	0.179219
		1308	-3.14631	-7.54788	1.29898	1.20309	1.25103	6.81454	-10.1684	0.154444	0.169147	0.161796	-1.68795	5.20826	0.315084	0.316038	0.315561
		1309	-0.533861	0.554612	0.788109	0.856005	0.822057	6.4305	4.78025	2.22804	2.15932	2.19368	3.97954	1.62065	0.396577	0.401347	0.398962
		1310	5.0873	7.12197	0.218412	0.205218	0.211815	-0.976384	-0.446233	0.520025	0.541814	0.530919	-6.2987	-9.32237	0.313589	0.315523	0.314556
		1311	-23.961	10.3635	0.228385	0.218958	0.223671	-30.3464	1.75971	0.534278	0.552115	0.543196	-35.4309	-6.18549	0.313949	0.318474	0.316211
		1312	11.6393	20.4273	0.404869	0.359944	0.382407	24.2985	3.87668	2.28103	2.286	2.28352	39.518	6.18599	7.4877	8.86086	8.17428
		1313	-2.97015	-8.01332	1.81729	1.724	1.77065	0.325125	0.69195	0.24211	0.256723	0.249417	-0.080013	1.8529	0.0643496	0.080355	0.0723523
		1314	1.99013	-26.2966	0.335427	0.33754	0.336483	-0.150067	-26.5008	1.23663	1.1184	1.17752	6.49764	-25.6976	2.54218	2.37499	2.45859
		1315	-0.340642	2.41133	0.84666	0.857556	0.852108	-0.484817	-0.531279	0.112687	0.11493	0.113808	1.75424	-7.30762	0.469395	0.485568	0.477481
		1316	-3.21161	5.87861	0.686773	0.646836	0.666804	5.03093	3.99746	4.41629	3.93448	4.17538	-7.1273	-4.99567	0.764867	0.79684	0.780854
		1317	8.92295	4.51357	0.40569	0.311174	0.358432	15.4732	-7.38098	0.935164	0.860324	0.897744	-1.22742	-10.6	0.450742	0.441059	0.4459
		1318	-4.94848	8.30474	0.216469	0.211377	0.213923	-0.303398	-0.811846	0.466881	0.433881	0.450381	2.67519	-10.2855	0.719672	0.608054	0.663863
		1319	-2.98331	3.62784	0.23526	0.30194	0.2686	-1.4162	2.42649	0.250055	0.316391	0.283223	-2.29437	-14.0108	0.193055	0.188562	0.190808
		1320	-7.04003	-18.365	0.374486	0.429296	0.401891	-2.31519	-12.5875	0.500227	0.638277	0.569252	5.92043	19.7774	0.276184	0.338552	0.307368
		1321	20.8952	-6.19592	0.564943	0.153043	0.358993	27.9073	5.8427	1.38179	0.427449	0.904622	34.0735	11.8223	0.244776	0.183944	0.21436
		1322	3.32204	5.79391	0.0971877	0.0897136	0.0934506	1.07854	2.21125	0.0607479	0.0547616	0.0577547	-1.19677	-3.93063	0.198472	0.169936	0.184204
		1323	-0.580916	0.401553	0.0936732	0.105147	0.0994101	0.844277	-0.637815	0.409293	0.426421	0.417857	2.69129	-1.99422	1.29722	1.66803	1.48263
		1324	-1.86969	7.31109	0.311254	0.357446	0.33435	4.98931	-8.54427	0.547096	0.543624	0.54536	-5.92853	-3.8834	1.18104	1.39878	1.28991
		1325	5.11451	-2.46926	0.576043	0.524688	0.550365	-2.99182	3.44025	0.0751986	0.068635	0.0719168	2.90439	-3.5864	0.430858	0.402261	0.41656
		1326	1.04917	3.30273	0.142146	0.149925	0.146035	0.0904913	0.562137	0.20304	0.222295	0.212667	-0.155896	-2.16591	0.156669	0.176498	0.166584
		1327	-9.19184	0.591175	0.412755	0.376682	0.394718	-0.358971	0.270521	0.078463	0.0827135	0.0805882	-1.45623	-0.0457017	0.0474357	0.0486492	0.0480425
		1328	-0.798935	0.364101	0.0744454	0.0840648	0.0792551	0.915138	0.42803	0.0934478	0.10452	0.098984	-1.10288	0.325902	0.168928	0.186483	0.177706
		1329	9.62417	-29.8492	3.55701	2.26964	2.91332	-6.85602	5.34296	0.294497	0.295768	0.295133	-11.8887	7.11311	0.0872896	0.0934125	0.090351
		1330	-4.76701	0.220079	0.374099	0.362589	0.368344	3.88538	1.14039	1.22333	1.05321	1.13827	15.3232	-1.98416	0.348859	0.35093	0.349894
		1331	12.8545	17.6081	0.258936	0.265559	0.262247	3.95143	3.2418	1.4759	1.48881	1.48236	-2.18046	-7.49699	0.527389	0.536697	0.532043
		1332	0.509772	2.16548	0.203939	0.191764	0.197852	4.12489	-2.66512	0.415528	0.424492	0.42001	13.783	-7.66036	2.21322	1.64057	1.92689
		1333	-18.5709	3.00305	0.598509	0.540867	0.569688	-18.3394	3.87135	0.824209	0.742337	0.783273	-22.7168	0.96428	2.81376	3.0979	2.95583
		1334	-2.30957	0.5679	0.239519	0.21258	0.226049	1.93891	-2.12348	1.24699	1.15551	1.20125	7.94471	-3.59473	0.470679	0.485419	0.478049
		1335	5.13652	-8.62285	0.940841	0.943288	0.942064	6.66418	-7.75586	0.619111	0.670943	0.645027	11.1268	-2.99805	9.89766	16.9964	13.447
		1336	3.1633	-6.13493	0.138393	0.13941	0.138901	3.7152	-2.13459	0.678031	0.67047	0.67425	0.247967	3.10663	2.04283	1.84549	1.94416
		1337	-8.84637	15.2939	1.24301	1.15291	1.19796	-4.82847	7.41863	0.136121	0.146142	0.141131	-5.69716	5.72389	0.695272	0.802775	0.749024
		1338	0.50018	5.03202	0.262881	0.283767	0.273324	-1.18293	-0.375136	0.22069	0.229397	0.225044	-5.84154	1.63908	0.606103	0.649187	0.627645
		1339	8.60499	6.115	0.198039	0.188794	0.193416	-3.47425	-4.1909	0.17045	0.166521	0.168485	-11.5417	-1.54903	0.170669	0.160142	0.165405
		1340	-9.41897	-14.0685	0.582502	0.610674	0.596588	-10.9802	-12.4279	0.688968	0.783002	0.735985	4.39247	7.73378	1.23463	0.919044	1.07684
		1341	0.919709	6.06107	0.13733	0.127618	0.132474	-0.297852	-1.89363	0.238957	0.225732	0.232344	2.40041	-0.593285	0.23676	0.221147	0.228953
		1342	3.53352	-2.69975	0.21081	0.21175	0.21128	4.37122	0.306341	1.34167	1.26843	1.30505	-8.17658	-0.642327	0.678799	0.655971	0.667385
		1343	-5.68269	5.00834	0.848844	0.755059	0.801952	-0.270185	-0.791196	0.43257	0.415164	0.423867	6.5087	2.01911	0.524809	0.474896	0.499853
		1344	-50.8682	22.0778	0.939276	0.746862	0.843069	-52.2113	22.4541	0.504276	0.364777	0.434526	-41.0545	20.5577	0.902847	0.838534	0.870691
		1345	3.87645	3.5158	4.3625	4.45731	4.4099	1.31895	0.191326	0.199935	0.215783	0.207859	0.000705916	-0.383158	0.122219	0.128488	0.125353
		1346	-2.88028	-0.532729	0.136088	0.139487	0.137788	-1.49351	-1.7951	0.147921	0.146984	0.147452	0.639538	-1.18022	0.125704	0.12875	0.127227
		1347	-6.45752	5.37482	0.205273	0.21546	0.210366	-4.34104	2.84336	0.477717	0.497339	0.487528	0.723697	5.76553	0.555785	0.589145	0.572465
		1348	11.4965	-24.2121	1.84447	3.12012	2.48229	13.1832	-21.8332	0.253586	0.296806	0.275196	13.4046	-23.7485	0.348113	0.372489	0.360301
		1349	-6.79976	-1.20078	0.184493	0.171527	0.17801	-3.48119	-1.27317	0.0977894	0.0878805	0.092835	2.5183	-0.432982	0.160917	0.149504	0.155211
		1350	0.756464	-1.10209	0.889548	1.26504	1.07729	-0.0198766	5.6956	0.373928	0.565782	0.469855	8.82309	4.5087	0.884296	0.961024	0.92266
		1351	-4.31183	-3.59468	0.137261	0.146955	0.142108	-0.666841	-2.81675	0.115055	0.153505	0.13428	-0.725587	1.33516	0.228979	0.476086	0.352532
		1352	2.33967	2.84951	0.333897	0.432534	0.383216	5.39868	2.85015	0.41241	0.549948	0.481179	-4.32166	-2.67498	0.153367	0.190285	0.171826
		1353	29.9581	-55.1465	1.06207	2.00914	1.5356	-0.990416	6.10576	1.24826	1.53148	1.38987	15.6865	-8.16375	0.33527	0.354557	0.344913
		1354	-2.30322	23.3665	0.719561	0.892424	0.805992	-1.91224	1.77101	0.520733	0.733042	0.626888	-19.1295	-16.9615	4.13244	4.79536	4.4639
		1355	-2.00701	-6.43731	0.416785	0.425649	0.421217	-0.123402	0.690948	0.41198	0.434541	0.423261	0.353164	2.43603	0.476734	0.510403	0.493569
		1356	-2.2376	-2.33474	0.735945	0.606324	0.671134	14.8015	10.9218	1.14044	0.872824	1.00663	-40.6683	-27.5905	1.54016	1.25904	1.3996
		1357	-0.825765	-1.46591	0.0833142	0.111555	0.0974345	-1.02919	-4.04096	0.0569667	0.0697285	0.0633476	-0.758351	-0.326261	3.3261	3.19983	3.26297
		1358	6.77149	-1.46522	0.530788	0.589419	0.560104	-0.933293	2.08641	0.123296	0.123862	0.123579	-0.985393	1.06881	0.206127	0.21428	0.210204
		1359	0.439025	0.43549	0.322606	0.321002	0.321804	1.55677	-1.93669	0.2421	0.231127	0.236614	-1.35757	-0.194638	0.391945	0.407355	0.39965
		1360	1.48016	-0.456479	0.365434	0.382835	0.374135	4.33068	1.6612	0.200093	0.193031	0.196562	-6.07189	-3.99071	0.744765	0.738256	0.741511
		1361	-8.20545	8.29514	0.70317	0.791019	0.747095	0.0481722	-0.465582	0.340286	0.338585	0.339435	-26.4528	17.1687	0.290072	0.267431	0.278752
		1362	-5.03333	6.22672	0.769586	0.831637	0.800611	11.054	14.0794	13.1427	6.65883	9.90076	-2.9055	-4.95582	0.694913	0.662878	0.678895
		1363	-2.25053	10.6907	0.334207	0.308612	0.321409	-2.38101	-8.80534	0.43023	0.461863	0.446046	-2.27682	-12.1837	0.37637	0.383666	0.380018
		1364	15.0559	20.124	1.42295	1.87582	1.64939	12.5208	20.7719	0.462308	0.597789	0.530049	19.0532	21.5919	1.18572	1.63682	1.41127
		1365	-10.0469	-12.7785	0.826592	0.857952	0.842272	1.70377	6.84318	0.388779	0.441394	0.415086	-17.0512	13.4881	0.67586	0.737884	0.706872
		1366	-3.45151	-8.80916	0.670513	0.817185	0.743849	-1.10684	2.28297	0.28747	0.313558	0.300514	3.50558	-0.659718	0.157033	0.176267	0.16665
		1367	-3.65198	4.73855	0.360693	0.350524	0.355608	-2.51131	1.18541	0.144457	0.176994	0.160725	-1.97744	14.367	0.253689	0.282809	0.268249
		1368	-7.60485	-5.38747	0.218042	0.222942	0.220492	-6.96127	-4.67143	1.0124	1.02972	1.02106	-0.234769	-7.31771	1.36634	1.2966	1.33147
		1369	-1.04002	3.45327	0.314953	0.331873	0.323413	3.78575	-8.54247	0.526992	0.562009	0.5445	12.8099	7.85625	1.0316	1.04095	1.03628
		1370	-0.82905	-2.49051	0.225806	0.256918	0.241362	0.284164	-4.44044	0.287349	0.311616	0.299482	1.61375	-7.62399	1.27823	1.38288	1.33055
		1371	4.63239	-7.49329	0.13753	0.138152	0.137841	2.40983	0.960551	0.477555	0.472544	0.47505	-5.94217	0.455511	1.25884	1.59051	1.42468
		1372	-5.57493	-39.1375	0.259589	0.272403	0.265996	-6.12352	-40.4669	0.281196	0.297976	0.289586	-12.5614	-42.3017	0.65409	0.749029	0.70156
		1373	21.4122	8.28141	0.659532	0.74791	0.703721	-3.31873	15.3052	1.00898	1.27362	1.1413	5.30094	-7.02014	2.30683	1.82507	2.06595
		1374	28.3644	18.4431	0.502165	0.519375	0.51077	26.6548	17.7859	0.61128	0.662059	0.636669	25.718	15.4215	1.70822	1.81616	1.76219
		1375	-19.4979	-1.12165	6.63351	12.7482	9.69085	1.84752	1.3111	0.25606	0.244775	0.250417	0.17159	-0.0729329	0.165607	0.156161	0.160884
		1376	21.4773	-18.1426	4.9174	4.31368	4.61554	8.58912	-1.35992	0.417936	0.427228	0.422582	12.0884	-0.434477	0.582664	0.590162	0.586413
		1377	-3.23925	-1.60722	0.793239	0.784403	0.788821	-2.0528	-0.874267	0.147186	0.132146	0.139666	4.7858	2.43703	0.285988	0.243582	0.264785
		1378	-26.245	-4.04642	0.725051	0.650138	0.687594	-7.73024	-16.3834	0.857645	0.948497	0.903071	-5.99789	-19.3064	0.702777	0.779467	0.741122
		1379	-6.78859	3.04295	1.19771	0.845133	1.02142	-1.7292	9.59994	4.66423	4.1149	4.38956	-15.9812	5.12806	3.50258	3.02713	3.26486
		1380	1.84169	6.51432	3.00286	2.92939	2.96612	-0.136993	0.606457	0.206643	0.198587	0.202615	0.228262	-4.39006	0.44242	0.443828	0.443124
		1381	2.41071	-6.58926	0.276959	0.265446	0.271203	-1.66085	1.5047	0.111445	0.109513	0.110479	-2.68417	-1.74103	0.140301	0.141065	0.140683
		1382	3.75828	-1.099	0.286941	0.280906	0.283924	3.92726	-2.25918	0.875171	0.993203	0.934187	30.436	18.3271	8.7846	8.28862	8.53661
		1383	-10.4154	9.59376	2.88458	2.24878	2.56668	-9.61849	9.01979	1.44265	1.62846	1.53556	-0.0820233	0.339184	0.0947237	0.0981167	0.0964202
		1384	114.789	-151.877	1.74479	2.27764	2.01121	-7.67585	44.81	0.469659	0.514867	0.492263	-7.52843	45.2911	0.409977	0.414554	0.412266
		1385	2.90492	4.35073	0.307701	0.335651	0.321676	-1.65719	-5.01249	0.158127	0.163337	0.160732	0.810965	0.116809	0.431448	0.464396	0.447922
		1386	-2.96779	-3.16467	0.713384	0.709231	0.711308	1.44408	-0.179754	1.0379	1.10359	1.07075	0.400317	-0.0832262	0.286968	0.287154	0.287061
		1387	3.38454	-2.28139	1.14567	1.07407	1.10987	1.35163	-3.17352	0.10759	0.100622	0.104106	-4.49787	-5.42092	0.633444	0.751691	0.692568
		1388	4.10958	-1.16467	0.83032	0.863374	0.846847	5.49785	3.37738	0.484694	0.523617	0.504155	3.06654	-7.95677	0.249388	0.253176	0.251282
		1389	2.9654	-0.149213	0.430082	0.49341	0.461746	-5.58411	-4.18138	0.564873	0.549892	0.557382	-6.95087	-4.64671	0.246254	0.232976	0.239615
		1390	-4.09747	1.90419	0.216683	0.197241	0.206962	2.10327	-5.74674	0.579516	0.574086	0.576801	2.86639	-7.82915	0.180985	0.183066	0.182026
		1391	-7.39881	14.8666	0.441242	0.416922	0.429082	-2.98777	2.21783	1.19011	1.15163	1.17087	-0.36959	-8.67994	0.550843	0.51665	0.533747
		1392	4.12597	-10.7645	0.914741	0.963154	0.938948	3.64851	-4.0519	0.355916	0.345024	0.35047	-2.7457	10.7207	0.18249	0.196801	0.189645
		1393	-0.599037	0.216099	0.241023	0.223784	0.232403	-0.379248	-0.344631	0.284885	0.263575	0.27423	0.484415	-2.91056	2.41304	1.87877	2.14591
		1394	-1.59601	-4.17446	0.350308	0.334928	0.342618	2.46803	4.76253	0.452852	0.480931	0.466891	5.2132	5.36192	0.463023	0.48655	0.474786
		1395	-3.90924	-2.8767	0.434069	0.439091	0.43658	1.41723	-1.82862	0.167393	0.168779	0.168086	2.72033	-5.80539	0.919998	0.931435	0.925716
		1396	1.65888	-0.216693	0.370481	0.35339	0.361936	1.42596	-0.527871	0.526199	0.504838	0.515519	2.79349	-4.26364	1.99965	1.88142	1.94053
		1397	1.51915	-3.99115	0.219303	0.208928	0.214115	-8.93454	-5.84404	0.910308	0.703023	0.806666	-0.32778	0.990972	0.802203	0.795928	0.799066
		1398	15.4418	3.33235	1.40949	1.45103	1.43026	2.21513	6.32071	0.763088	0.88623	0.824659	7.32549	-5.69553	0.277442	0.347387	0.312414
		1399	-7.04672	-8.6549	0.222598	0.236449	0.229524	-6.94585	-10.5959	0.45553	0.512967	0.484248	-5.57322	-10.6717	0.11479	0.140267	0.127529
		1400	7.32786	-15.9401	0.569251	0.656872	0.613061	7.16178	-15.9837	1.08	1.29076	1.18538	-12.3694	10.8633	2.45034	2.88812	2.66923
		1401	-1.36933	-1.2152	0.264709	0.213133	0.238921	-4.56888	-2.10447	0.29722	0.282028	0.289624	-10.5267	-6.99512	2.30725	2.9826	2.64493
		1402	0.138563	0.783934	0.742199	0.747854	0.745026	-0.727371	-0.829491	0.293329	0.303498	0.298413	-0.981145	0.462949	0.374939	0.365479	0.370209
		1403	2.08311	-0.0250122	0.101673	0.138617	0.120145	-5.19404	6.18534	0.703392	0.862715	0.783053	-0.325921	9.31527	4.12144	4.05587	4.08865
		1404	-6.48615	6.18617	0.642495	0.827108	0.734802	-11.9194	7.70031	0.293541	0.371103	0.332322	14.0391	-9.48799	0.689479	0.941059	0.815269
		1405	3.50568	-15.089	0.295779	0.299948	0.297864	4.95157	-9.10225	0.302834	0.331505	0.31717	5.72035	-2.11831	0.264453	0.298776	0.281615
		1406	-0.173875	-2.43749	0.122957	0.121833	0.122395	-0.240943	-0.31995	0.262764	0.264064	0.263414	-2.33249	2.62808	0.47797	0.480015	0.478993
		1407	0.0745944	-1.18807	0.301967	0.325387	0.313677	0.131743	-0.205768	0.11664	0.124554	0.120597	0.810121	0.969346	0.264393	0.297232	0.280812
		1408	1.03436	-18.0806	0.373325	0.386633	0.379979	8.00839	-5.4998	0.350001	0.338772	0.344386	-1.90161	2.59384	0.152213	0.155634	0.153923
		1409	5.31063	8.42926	0.99241	1.03463	1.01352	3.1758	10.2521	0.389004	0.472675	0.430839	4.95094	12.1229	0.17585	0.206014	0.190932
		1410	-13.3888	17.9155	0.580283	0.602061	0.591172	-5.24074	20.7699	1.1593	1.24292	1.20111	-20.6415	4.20606	0.553371	0.589184	0.571278
		1411	-9.59543	-17.0772	0.703652	0.655866	0.679759	-2.50066	-7.66606	0.494577	0.533887	0.514232	4.12037	5.15234	0.114889	0.162889	0.138889
		1412	35.4853	-6.65074	0.169908	0.124055	0.146982	37.275	-4.53062	0.246087	0.136026	0.191057	51.2221	7.27143	0.101954	0.0690586	0.0855064
		1413	2.1656	-7.12933	0.730426	0.733519	0.731973	-3.10302	-3.7104	0.468248	0.461045	0.464646	5.91555	5.29516	1.27922	1.1837	1.23146
		1414	-7.34512	6.92874	0.399058	0.454604	0.426831	0.0258636	-0.645932	1.79344	1.85255	1.823	4.60813	-7.00682	0.401568	0.401023	0.401295
		1415	-30.1272	-13.5269	0.335831	0.365575	0.350703	-31.6054	-16.5305	0.121505	0.145708	0.133607	-35.914	-20.5306	0.103685	0.123547	0.113616
		1416	-9.38503	-10.9868	0.72205	0.700057	0.711054	-5.71111	-4.7789	0.999528	1.16655	1.08304	-3.32046	1.28079	0.278784	0.312753	0.295769
		1417	-0.615719	0.173956	0.0753084	0.0727164	0.0740124	1.02254	-0.727777	0.14081	0.138587	0.139698	7.0455	-4.16633	1.88279	1.80044	1.84162
		1418	8.65848	-63.0845	0.285199	0.505699	0.395449	-14.1269	68.5651	0.515168	0.834348	0.674758	-8.41524	68.4388	0.609642	1.01217	0.810904
		1419	-44.4309	8.93625	0.386866	0.191751	0.289309	145.267	-20.3106	2.01717	0.492511	1.25484	184.467	-31.4729	1.69356	0.823329	1.25845
		1420	2.57994	2.24975	0.679281	0.663913	0.671597	-1.64654	1.22039	1.65535	1.69255	1.67395	-2.61297	0.311194	0.797152	0.782611	0.789882
		1421	-0.640836	-2.0079	1.58846	1.20314	1.3958	5.26633	6.5837	2.68431	2.46585	2.57508	-25.965	15.1864	0.155006	0.128839	0.141923
		1422	-8.49043	-12.7809	0.287534	0.227985	0.257759	-0.417484	-13.071	0.752626	0.850435	0.80153	0.881477	2.0595	0.264995	0.351048	0.308022
		1423	-23.3108	-111.344	0.145646	0.230475	0.188061	-18.3624	-106.168	0.145967	0.559699	0.352833	14.1654	179.61	0.140434	0.432368	0.286401
		1424	-8.46304	15.053	0.196999	0.210242	0.203621	1.75978	4.89205	0.660095	0.750243	0.705169	1.24397	-4.03213	0.84562	1.05735	0.951487
		1425	-17.2667	3.19692	0.725899	0.75991	0.742905	-11.5637	3.38879	0.458167	0.436556	0.447361	-5.54255	-0.992353	0.270728	0.200147	0.235438
		1426	0.721008	6.92771	0.600829	0.598048	0.599439	-10.8051	-8.89187	1.04296	1.32958	1.18627	2.39178	17.0187	0.448451	0.49271	0.47058
		1427	1.65699	10.4699	2.98045	3.96128	3.47087	1.12325	11.3473	1.18518	0.988342	1.08676	3.06841	8.17835	0.474817	0.415899	0.445358
		1428	-1.14866	1.88317	0.166505	0.189364	0.177935	-1.5123	-0.294183	0.207706	0.22995	0.218828	-1.11343	7.90883	0.261995	0.276229	0.269112
		1429	3.22087	2.23054	0.827209	0.657283	0.742246	-0.225598	-4.97866	0.303038	0.390899	0.346968	1.90254	-10.0113	0.164864	0.168521	0.166692
		1430	1.30792	2.86139	0.233843	0.228694	0.231269	-0.363749	2.33011	0.354022	0.355426	0.354724	-5.31978	-2.23674	0.619812	0.565244	0.592528
		1431	-2.92307	1.13402	0.216018	0.20638	0.211199	-0.377677	0.514689	0.249997	0.243585	0.246791	3.74575	0.0401591	0.495413	0.500904	0.498158
		1432	-3.56588	-1.54131	0.128131	0.118431	0.123281	0.833595	0.381607	0.156028	0.140046	0.148037	14.0137	-0.320191	0.557017	0.488436	0.522726
		1433	-1.51737	-2.21441	0.0664194	0.0625347	0.064477	2.92914	3.34386	0.229548	0.245966	0.237757	9.10262	5.7956	0.612335	0.67738	0.644857
		1434	8.74509	-5.87151	0.435825	0.388906	0.412366	-14.9538	-5.81862	0.400093	0.355289	0.377691	49.3484	2.57116	1.25099	0.927839	1.08941
		1435	-0.861657	-2.20386	0.351206	0.365925	0.358566	5.01597	4.01298	2.20054	2.3587	2.27962	1.11523	9.05077	2.78372	3.51334	3.14853
		1436	-9.88408	-1.02209	0.622724	0.61665	0.619687	-1.06525	-0.924335	0.454966	0.445764	0.450365	1.73117	-1.14323	0.95335	0.934999	0.944174
		1437	-0.557732	-5.37031	0.348315	0.363755	0.356035	3.61854	1.52814	3.78713	4.76389	4.27551	1.491	5.40409	2.88778	3.6524	3.27009
		1438	2.29762	-19.7349	0.445288	0.622019	0.533654	1.47484	-11.748	0.398674	0.778788	0.588731	3.21193	-3.06142	0.221408	0.510369	0.365888
		1439	0.452733	1.47527	0.881006	0.844698	0.862852	-0.354732	0.142044	0.660848	0.61695	0.638899	6.56512	-0.109582	0.661879	0.652717	0.657298
		1440	-6.76299	2.03852	0.21788	0.209234	0.213557	3.50268	0.127742	0.28656	0.292132	0.289346	6.75802	2.34976	0.811943	0.837571	0.824757
		1441	-1.30866	-0.0557797	0.337932	0.279931	0.308932	11.4825	3.60124	4.61921	3.53184	4.07553	6.71578	0.59139	1.29388	1.02361	1.15874
		1442	-6.53594	-6.11754	7.33452	5.06688	6.2007	-10.6249	14.2554	1.37784	1.75841	1.56812	-7.66736	11.8684	0.592342	0.645951	0.619146
		1443	-1.1723	0.93656	0.771085	0.950999	0.861042	-0.287196	6.70659	1.00864	1.10829	1.05847	-2.20914	15.7607	0.162093	0.159754	0.160923
		1444	-2.29026	-2.51913	0.286357	0.267315	0.276836	-0.427763	-2.59359	0.320002	0.281458	0.30073	-3.21478	-0.451252	0.239785	0.229767	0.234776
		1445	-5.08497	-2.53604	0.275428	0.294331	0.28488	1.44039	0.576213	0.287121	0.302391	0.294756	2.23914	-3.41823	0.335226	0.368447	0.351837
		1446	1.87773	4.16178	0.861913	0.850109	0.856011	2.0653	5.06071	0.587871	0.604859	0.596365	2.05439	6.01927	0.548543	0.557325	0.552934
		1447	-1.03069	-4.88608	0.366641	0.395569	0.381105	1.45202	1.02199	0.355461	0.383126	0.369293	5.68481	8.04581	0.250482	0.266809	0.258646
		1448	-3.6908	3.93001	0.620455	0.641942	0.631199	2.07676	-0.665134	0.458599	0.465007	0.461803	-2.98978	-8.34835	0.344602	0.363003	0.353803
		1449	5.33997	-4.80177	1.45618	1.3511	1.40364	-0.51835	0.685267	0.35746	0.380196	0.368828	14.474	-3.55118	1.6592	1.61782	1.63851
		1450	7.52398	-11.4478	0.631141	0.797335	0.714238	-12.3951	2.22709	0.486204	0.600435	0.54332	-6.62263	13.8023	0.301401	0.336422	0.318911
		1451	3.57492	-37.1719	0.289019	0.471285	0.380152	2.7019	-35.2557	0.213267	0.375033	0.29415	1.01323	-31.6639	0.215947	0.447347	0.331647
		1452	0.541899	1.00596	0.148833	0.174572	0.161702	-3.47835	-2.13274	0.491801	0.545011	0.518406	-6.70191	-8.6581	0.255205	0.284231	0.269718
		1453	-7.10026	19.3614	1.18767	1.36902	1.27835	-0.762865	-0.292092	0.299554	0.320117	0.309836	-1.04256	-2.02008	0.0751922	0.0784254	0.0768088
		1454	-9.62235	9.87075	2.63213	2.10144	2.36678	-0.0271852	1.51321	0.436341	0.398541	0.417441	-2.92075	-9.70829	1.14543	1.10753	1.12648
		1455	7.29554	-7.58394	1.32494	1.28706	1.306	-2.65871	0.308679	1.87008	2.01328	1.94168	-5.71153	4.4542	0.748714	0.790661	0.769687
		1456	2.13045	3.61053	4.22369	3.53934	3.88152	-2.15227	3.62498	1.36076	1.39174	1.37625	1.22513	-1.39172	0.352752	0.318789	0.335771
		1457	0.415555	-0.306736	0.0800355	0.0823405	0.081188	-0.985227	0.48744	0.151018	0.151497	0.151258	-1.50584	1.57898	0.898801	0.968695	0.933748
		1458	-3.95869	-0.417976	0.128331	0.1038	0.116065	3.66902	1.87465	0.245476	0.19994	0.222708	11.1114	-5.35655	0.410121	0.387871	0.398996
		1459	7.36001	-8.6371	0.396745	0.406466	0.401606	-1.20676	-0.746683	0.467624	0.49649	0.482057	-8.49132	6.61572	0.420516	0.422753	0.421635
		1460	-7.96461	-6.92394	3.49417	2.69267	3.09342	2.39188	0.852432	0.808123	0.853701	0.830912	-11.2568	6.02573	0.631186	0.527303	0.579245
		1461	-0.813029	1.12728	0.196049	0.218619	0.207334	6.44886	5.49383	1.06706	1.11831	1.09268	12.4025	20.6668	7.83859	7.28205	7.56032
		1462	6.97022	1.23487	0.223822	0.237743	0.230783	2.0281	1.74788	0.236871	0.261849	0.24936	-0.933665	-1.35913	0.236103	0.249175	0.242639
		1463	6.71673	-8.79987	1.54178	1.41223	1.47701	6.42276	4.71645	0.130667	0.101562	0.116114	6.77099	5.95293	0.0952385	0.0736096	0.0844241
		1464	-1.67419	5.70154	2.6116	2.46654	2.53907	0.624701	3.64836	0.211461	0.220284	0.215873	0.430192	5.97407	0.34181	0.358397	0.350104
		1465	-2.96002	3.2378	0.163181	0.147121	0.155151	-2.72473	4.94966	0.112552	0.092743	0.102648	-5.67896	5.61205	0.304657	0.256882	0.28077
		1466	0.202475	0.451282	0.0950719	0.0943393	0.0947056	-0.49549	-0.917655	0.356854	0.331416	0.344135	-3.80828	-7.12939	0.701695	0.680939	0.691317
		1467	3.77975	-6.34083	0.197116	0.183286	0.190201	-26.6742	18.066	4.98045	2.5617	3.77107	-195.22	70.6826	1.52618	1.23302	1.3796
		1468	-1.08381	2.43726	0.356269	0.356731	0.3565	-0.661265	1.79324	0.276334	0.278968	0.277651	0.257992	-1.27879	0.13678	0.144213	0.140496
		1469	5.2011	4.05544	0.165786	0.158551	0.162169	-0.577458	-1.67856	0.223603	0.225458	0.22453	1.09767	6.96665	0.402264	0.434382	0.418323
		1470	-4.23427	3.17687	0.306901	0.277497	0.292199	1.4562	-3.86476	1.37557	1.50858	1.44208	8.64204	-11.3395	0.395203	0.407707	0.401455
		1471	17.2846	6.34764	1.04164	1.085	1.06332	10.8219	4.23426	0.961893	0.775169	0.868531	-1.64359	0.774503	0.118742	0.0962343	0.107488
		1472	10.8295	-12.6914	38.6868	30.6599	34.6733	-1.45458	2.72713	1.98145	1.89932	1.94038	-0.579079	-1.63859	0.458175	0.431949	0.445062
		1473	-4.07658	2.54332	0.334701	0.2973	0.316001	13.5234	2.83378	8.03045	7.3468	7.68863	14.9975	-10.9814	0.844028	0.73857	0.791299
		1474	11.9752	-1.98892	0.105222	0.109618	0.10742	8.6431	-5.56219	0.229527	0.208212	0.218869	7.45322	-6.50446	1.29042	1.23543	1.26293
		1475	-1.91892	-2.24397	1.43742	1.69049	1.56396	-0.929759	1.35061	0.37449	0.40438	0.389435	-1.11808	-0.873994	0.202498	0.207281	0.204889
		1476	10.631	-0.783844	0.899222	0.868604	0.883913	1.16118	-0.396274	0.953823	0.899663	0.926743	-5.81158	-10.3969	0.24354	0.254891	0.249215
		1477	-3.35502	6.44379	0.116461	0.121373	0.118917	0.0737412	6.71335	0.746119	0.725153	0.735636	3.24363	-2.09735	0.169397	0.217521	0.193459
		1478	0.998537	-1.56319	0.0703069	0.081051	0.075679	0.397856	-2.39381	0.108009	0.122138	0.115073	-5.97628	1.38023	1.69915	1.66186	1.6805
		1479	2.85283	0.52799	0.538014	0.447348	0.492681	-0.517799	0.411818	0.0994324	0.0878274	0.0936299	-1.04723	-0.0527607	0.0902105	0.0843793	0.0872949
		1480	-4.25336	0.0517858	0.18641	0.181193	0.183802	3.11313	4.2578	0.26751	0.272239	0.269875	-4.16458	-0.669239	2.08039	2.41471	2.24755
		1481	10.1006	6.6348	0.953152	0.867235	0.910194	0.625401	1.74092	0.530414	0.553506	0.54196	-23.5782	4.92258	0.921151	0.974533	0.947842
		1482	4.44944	-16.8665	0.192265	0.192254	0.19226	6.58808	-5.47545	0.303136	0.441476	0.372306	-1.04571	1.50616	0.161886	0.196578	0.179232
		1483	19.6917	-104.997	2.22062	6.32718	4.2739	-1.37758	-1.08877	0.274448	0.654439	0.464444	-4.5392	-0.460995	0.231024	0.369819	0.300422
		1484	2.54823	7.31726	1.09029	1.10896	1.09963	1.74819	2.73077	0.423559	0.442868	0.433214	-6.0224	1.82959	1.21874	1.45178	1.33526
		1485	2.18918	2.12582	0.141831	0.102406	0.122119	4.74711	0.917206	0.246934	0.18038	0.213657	6.40977	0.0120704	0.222129	0.171712	0.196921
		1486	19.6823	-11.1644	1.07355	1.03083	1.05219	-14.4215	-9.80711	0.883803	0.929595	0.906699	-25.7565	-1.7254	0.350642	0.441792	0.396217
		1487	-3.73989	-6.66817	0.358786	0.392753	0.37577	1.31263	0.0685952	0.312701	0.374893	0.343797	-16.3087	-11.6513	1.53663	1.72287	1.62975
		1488	7.90239	2.96864	0.352568	0.480618	0.416593	-5.96961	1.32006	0.172071	0.198295	0.185183	6.05743	-3.69892	0.303805	0.375863	0.339834
		1489	4.89138	-14.7497	0.162143	0.170622	0.166383	-1.4157	-0.350906	0.61251	0.659879	0.636194	-2.99334	21.1255	0.412543	0.428016	0.420279
		1490	-0.365409	-0.814427	0.1018	0.114947	0.108374	1.81862	-5.15487	0.592493	0.745518	0.669005	-2.72469	-9.35985	0.557773	0.560214	0.558993
		1491	1.47913	0.969554	0.152144	0.12211	0.137127	1.30768	0.460594	0.0719085	0.0616924	0.0668004	-2.67062	-5.06054	0.436233	0.534742	0.485487
		1492	15.2899	-9.74509	0.3183	0.220995	0.269647	-3.9984	3.69247	0.292727	0.269649	0.281188	10.7755	-5.63813	1.72464	1.76296	1.7438
		1493	-8.39713	2.08865	0.834101	0.807173	0.820637	-5.06311	7.17848	6.7717	7.55587	7.16378	-2.70789	-1.40328	0.265886	0.248682	0.257284
		1494	0.300614	0.645832	0.114148	0.11793	0.116039	0.82622	3.1969	0.489451	0.460429	0.47494	3.25838	4.43997	0.803119	0.814627	0.808873
		1495	-7.6945	10.3429	6.40828	2.56981	4.48904	1.68211	-0.0350515	1.0143	1.01163	1.01296	0.678872	0.325303	0.099674	0.111335	0.105504
		1496	15.464	-7.54489	1.1789	1.21454	1.19672	27.8774	4.82053	1.13246	1.48716	1.30981	23.1344	-0.210201	0.0780724	0.0866729	0.0823726
		1497	-3.55294	6.60251	0.330612	0.336625	0.333619	-2.28988	-2.48228	0.743761	0.7529	0.748331	-1.14477	-4.19634	0.251345	0.242328	0.246836
		1498	2.49295	5.64682	1.42082	1.27826	1.34954	7.60927	7.70681	0.558584	0.522131	0.540357	9.15644	-0.287823	5.00988	3.90259	4.45623
		1499	1.07664	1.63824	0.548517	0.55359	0.551053	0.785584	-0.536825	0.247223	0.252493	0.249858	3.91583	-1.12431	0.661241	0.646113	0.653677
		1500	-15.3881	20.1619	0.80415	0.838954	0.821552	-1.75576	-4.27261	0.310634	0.325493	0.318064	6.65078	-1.08703	0.296709	0.306765	0.301737
		1501	-88.5081	12.6488	0.961074	0.906428	0.933751	-66.0295	-19.3345	0.62381	0.670182	0.646996	-62.7109	-17.6168	0.544113	0.544471	0.544292
		1502	3.27522	7.53839	1.81571	1.7127	1.7642	-4.84565	0.931463	0.373756	0.376323	0.37504	7.70263	13.5495	0.857024	1.05284	0.954931
		1503	-7.37011	12.7814	0.839352	0.807322	0.823337	-9.62123	7.93349	0.494825	0.465721	0.480273	0.240445	0.942927	0.233402	0.238151	0.235777
		1504	-11.2687	5.44062	2.12205	2.10915	2.1156	-17.2484	-2.83589	0.298929	0.305507	0.302218	-19.8028	-6.54145	0.320843	0.279591	0.300217
		1505	17.6434	0.69183	1.05353	1.38314	1.21833	-0.918998	-0.294963	0.194566	0.24333	0.218948	-5.57808	1.18894	1.00712	1.11357	1.06035
		1506	4.98983	20.7238	1.27778	1.59326	1.43552	-3.60447	-1.43599	0.537936	0.506902	0.522419	-22.4478	-6.44638	2.90839	3.89559	3.40199
		1507	-1.01107	-0.368458	0.110435	0.107977	0.109206	-3.5591	-2.05701	0.422872	0.384609	0.403741	-9.06553	-5.0247	0.914065	0.882194	0.898129
		1508	-8.48044	4.40423	1.12241	0.960976	1.04169	-7.53914	-9.985	1.46273	1.46951	1.46612	-6.65386	-7.36324	0.956738	0.960564	0.958651
		1509	-7.85724	1.68455	2.17723	2.18268	2.17996	-7.06759	4.93304	0.686956	0.685292	0.686124	-6.04237	4.82794	0.390666	0.391604	0.391135
		1510	16.6123	36.0017	5.50778	6.54156	6.02467	1.16626	23.1727	1.68371	2.12112	1.90242	-9.43718	-4.41922	0.494889	0.63454	0.564715
		1511	-118.105	22.784	0.839256	0.429239	0.634248	-64.6573	11.7607	4.70906	1.90002	3.30454	78.6112	-19.6804	0.569835	0.50046	0.535147
		1512	-1.30791	-0.426561	0.550166	0.484418	0.517292	1.1375	0.404149	1.17976	0.999997	1.08988	9.24409	-1.37158	0.556714	0.52455	0.540632
		1513	9.04278	-1.52642	0.479989	0.470029	0.475009	1.80209	-3.29369	0.15567	0.157813	0.156741	-1.7743	0.363288	0.0827618	0.0908882	0.086825
		1514	-15.6521	3.42113	0.494626	0.281291	0.387958	-31.2092	4.99394	0.774197	0.839653	0.806925	-36.6632	-3.39573	0.28592	0.310271	0.298095
		1515	-10.5505	-3.83221	0.311182	0.312798	0.31199	3.13408	4.236	0.719114	0.645191	0.682153	-1.72569	13.9032	0.528906	0.507321	0.518113
		1516	0.555889	1.07051	0.143653	0.147806	0.14573	-10.0096	-1.79256	0.715721	0.718484	0.717102	-16.6081	-0.641343	0.493876	0.460291	0.477084
		1517	-1.72446	2.75189	0.189562	0.179573	0.184567	-2.01588	0.833393	0.143565	0.149829	0.146697	-4.16012	-0.455332	0.0676758	0.0688069	0.0682413
		1518	-5.85931	9.38632	5.29352	6.116	5.70476	-1.4015	0.52784	0.682526	0.847838	0.765182	1.06708	-1.29633	0.738809	0.800334	0.769572
		1519	-1.84719	-6.40288	0.274474	0.255002	0.264738	1.44259	-1.12974	0.390791	0.349048	0.36992	-0.484839	-0.926167	0.0845232	0.0815548	0.083039
		1520	-9.20804	3.41323	0.133175	0.130693	0.131934	-0.459812	-5.82423	0.317279	0.316126	0.316702	18.2855	8.1004	0.21311	0.221892	0.217501
		1521	4.4437	5.21898	0.246333	0.224297	0.235315	1.09783	1.12915	0.135601	0.121401	0.128501	-0.127089	-7.37622	0.627343	0.522093	0.574718
		1522	6.79326	7.63389	1.0176	1.06262	1.04011	0.286889	-0.543067	0.436691	0.438408	0.43755	-8.99545	-1.9832	1.50283	1.49332	1.49807
		1523	-24.4156	75.0463	1.01556	1.08695	1.05126	-30.7857	67.2271	0.407644	0.419825	0.413734	-40.3575	65.911	1.61445	1.50221	1.55833
		1524	7.12614	-2.75106	0.425397	0.437247	0.431322	-0.712652	4.455	0.393389	0.39542	0.394404	7.77004	-8.15374	1.04295	1.18886	1.11591
		1525	1.09788	1.21238	1.64086	1.80503	1.72295	-0.76435	0.619154	0.274633	0.273442	0.274038	0.673479	-0.227108	0.323118	0.315782	0.31945
		1526	2.60721	-2.15296	0.376068	0.41132	0.393694	-3.92039	1.68042	0.188119	0.199847	0.193983	-7.35693	2.47807	0.304956	0.346926	0.325941
		1527	-10.4075	3.65011	0.389204	0.418581	0.403892	-2.08157	5.7492	1.04913	1.10622	1.07768	-1.23896	7.4068	0.1723	0.190298	0.181299
		1528	4.21895	4.88289	0.462943	0.418832	0.440887	-14.6153	3.67913	2.39107	2.49553	2.4433	6.72478	6.23252	2.19145	1.84276	2.01711
		1529	-9.3788	-4.75934	0.144933	0.136424	0.140678	-11.027	-1.15164	0.556836	0.494946	0.525891	-15.2315	-3.41158	1.11862	1.09953	1.10908
		1530	27.2138	5.27767	0.527256	0.550184	0.53872	-0.971188	1.4521	0.0897154	0.0749756	0.0823455	16.9506	-2.80643	3.44409	4.85522	4.14965
		1531	24.1629	5.03731	0.632887	0.569386	0.601136	8.50752	2.15586	0.363406	0.324856	0.344131	1.27011	-1.63939	0.119327	0.129921	0.124624
		1532	3.01257	3.18562	0.166965	0.167932	0.167449	3.67104	3.83466	0.250819	0.227686	0.239252	2.81881	4.75034	0.279295	0.289774	0.284535
		1533	-5.3451	3.91822	0.289824	0.309744	0.299784	-4.41682	3.92948	0.973999	1.02909	1.00154	1.05008	-2.92674	0.691694	0.781948	0.736821
		1534	-10.3212	12.5479	0.546043	0.651147	0.598595	-6.10255	11.6573	0.915525	1.15669	1.03611	-3.09433	-2.93391	1.26318	1.70945	1.48631
		1535	3.58441	0.661609	0.487346	0.495856	0.491601	-1.59844	3.04679	0.841884	0.779376	0.81063	1.80025	-3.57545	0.222364	0.227275	0.224819
		1536	-6.75936	4.40231	0.267389	0.262121	0.264755	2.404	-5.57833	0.427282	0.45759	0.442436	-1.02442	-11.2203	0.509382	0.581708	0.545545
		1537	17.8392	-41.0283	1.99735	2.56447	2.28091	6.69418	-20.2156	0.456294	0.740266	0.59828	12.848	-21.8137	0.188932	0.166726	0.177829
		1538	-3.9092	6.34096	0.268266	0.252973	0.26062	9.05911	4.65603	0.253579	0.308	0.280789	-2.37538	-16.4983	0.151934	0.17983	0.165882
		1539	89.264	19.5439	0.234659	0.255948	0.245303	86.2248	15.3008	0.147181	0.165285	0.156233	78.327	10.8519	0.183793	0.212697	0.198245
		1540	-0.123711	-3.83414	0.494457	0.534773	0.514615	-2.50585	-3.11247	0.541558	0.514074	0.527816	-3.48523	-3.58026	0.438915	0.386599	0.412757
		1541	2.90571	1.27569	0.109649	0.120269	0.114959	-2.60583	-2.92647	0.0795888	0.0794982	0.0795435	-1.8703	-2.17015	0.0813977	0.0903697	0.0858837
		1542	-4.91198	-6.36125	0.195335	0.192757	0.194046	-2.1397	-3.04247	0.248783	0.246277	0.24753	-12.4761	-1.78343	0.363728	0.373402	0.368565
		1543	-0.566105	-0.198448	0.390759	0.356975	0.373867	2.58535	0.943457	0.323684	0.320858	0.322271	3.90412	-2.06465	0.30599	0.318128	0.312059
		1544	2.24591	-16.2021	0.584653	0.680888	0.63277	9.55454	-13.1657	0.896484	1.0959	0.996191	-14.0642	19.138	0.676703	1.03311	0.854905
		1545	-1.06346	3.31906	0.712022	0.780707	0.746365	-3.49011	-0.543873	0.485455	0.529262	0.507358	15.7494	-7.91587	3.43659	4.37527	3.90593
		1546	-13.2916	-10.5598	0.598638	0.515402	0.55702	-2.34993	-1.74996	0.120978	0.130418	0.125698	-1.3799	4.45992	0.910142	0.869808	0.889975
		1547	1.12518	5.39609	1.09252	0.967063	1.02979	0.247205	0.550112	0.620456	0.55025	0.585353	4.85169	-3.09232	0.33577	0.340465	0.338118
		1548	2.13368	0.601799	0.434239	0.443917	0.439078	-0.0592311	0.18678	0.159868	0.155885	0.157876	-1.7401	0.474096	0.15064	0.144129	0.147385
		1549	-3.38591	8.34105	1.813	2.34638	2.07969	3.03672	-3.92652	0.10752	0.116424	0.111972	-0.817369	-3.9507	0.2233	0.227329	0.225315
		1550	-6.87025	8.71355	0.445932	0.426091	0.436012	-9.72768	8.78337	0.241349	0.241938	0.241643	-11.5494	9.3364	0.566218	0.62757	0.596894
		1551	-6.2654	3.32468	1.20072	1.0584	1.12956	2.95776	0.967583	0.728592	0.655965	0.692278	0.0298105	5.42017	0.409098	0.384607	0.396852
		1552	246.669	-53.8506	3.9894	1.37885	2.68413	-50.836	7.28123	0.788389	0.457423	0.622906	-82.4783	21.4687	1.78946	1.4137	1.60158
		1553	5.08495	-0.801288	0.335438	0.292997	0.314217	-2.04955	0.658281	0.369585	0.302042	0.335814	5.20682	-2.40886	1.17112	1.06662	1.11887
		1554	-13.255	0.424146	0.142971	0.118695	0.130833	-18.0587	20.961	3.65324	4.13355	3.89339	-11.9287	26.9697	1.40131	1.50949	1.4554
		1555	0.665085	0.57716	0.327059	0.329891	0.328475	-2.13287	-0.281835	0.104075	0.106195	0.105135	-0.59519	1.00764	0.0925878	0.0942654	0.0934266
		1556	-0.217938	0.192233	0.0889994	0.0845756	0.0867875	0.129506	-2.25529	1.52543	1.65007	1.58775	2.82892	-17.0326	0.87062	0.900326	0.885473
		1557	-13.9538	-0.352916	1.92291	1.55139	1.73715	-3.58634	6.85611	3.73141	3.03137	3.38139	2.21512	12.3751	2.62014	2.49654	2.55834
		1558	-5.37604	8.41507	0.120229	0.268034	0.194131	24.4349	-40.0847	0.987447	2.76092	1.87419	93.5294	-216.957	6.75548	13.5318	10.1437
		1559	7.89775	12.0228	0.401466	0.406643	0.404054	4.4344	-5.53947	0.422841	0.368196	0.395519	-8.32618	-5.24138	0.362809	0.345802	0.354305
		1560	2.82171	-5.08632	0.120279	0.0783017	0.0992905	0.851316	-0.559619	2.2705	1.60747	1.93898	2.69459	13.1705	2.07502	1.27613	1.67557
		1561	9.11268	7.93092	0.555739	0.565691	0.560715	8.68104	7.67889	1.1009	1.01062	1.05576	-9.13536	0.00909943	0.223087	0.218642	0.220864
		1562	-2.63301	-3.85166	0.379061	0.469505	0.424283	-2.41061	-1.47582	0.270044	0.354447	0.312246	3.61104	7.57642	0.149462	0.182411	0.165937
		1563	1.69219	-1.46822	0.741092	0.776425	0.758758	-1.02145	2.62467	0.367826	0.386844	0.377335	-5.467	5.73821	0.244065	0.258479	0.251272
		1564	47.4224	52.8243	1.60042	1.61254	1.60648	2.79064	9.45599	2.35416	2.14132	2.24774	-25.4807	-15.7476	0.311386	0.303873	0.30763
		1565	6.42636	0.846233	1.90371	1.63587	1.76979	-12.4628	1.34243	1.41605	1.03052	1.22329	-14.4898	0.461367	0.313414	0.242396	0.277905
		1566	15.171	-9.22402	0.507742	0.528075	0.517909	6.73405	-5.79157	0.314019	0.275783	0.294901	-3.69736	4.0476	0.232137	0.20181	0.216974
		1567	8.66325	10.2818	0.988625	1.13538	1.062	6.09945	6.06409	0.238273	0.279012	0.258642	-40.0386	-19.1507	1.37589	2.12671	1.7513
		1568	-1.00134	31.9239	0.549057	0.511839	0.530448	1.71759	-10.2164	1.70764	1.9033	1.80547	11.713	-33.8954	0.679012	0.802906	0.740959
		1569	-2.31635	-4.79876	0.116232	0.172154	0.144193	-0.34101	-4.97255	0.0980704	0.136434	0.117252	-0.391221	-6.83846	0.12241	0.167523	0.144966
		1570	2.73757	2.92882	0.506131	0.562742	0.534437	2.9179	-0.36018	0.17096	0.164567	0.167763	-5.35264	0.360672	0.192554	0.191375	0.191965
		1571	7.84828	7.60382	9.08814	8.683	8.88557	-13.9796	-7.33703	1.30407	1.09564	1.19985	29.8534	-5.44837	0.928706	0.72331	0.826008
		1572	0.501913	1.31565	0.267121	0.2632	0.26516	0.410892	0.0858493	0.0814258	0.0788718	0.0801488	-0.408236	-0.145396	0.0898286	0.0862951	0.0880618
		1573	-1.63944	2.9583	0.327824	0.369979	0.348901	-7.99522	-0.0291925	0.278974	0.290306	0.28464	-9.04447	-15.132	0.368654	0.336719	0.352686
		1574	28.6971	-3.30692	1.83881	1.402	1.6204	22.3165	-1.96592	0.612796	0.453167	0.532982	23.848	-3.65549	0.607216	0.500085	0.55365
		1575	-4.11117	3.00732	0.896185	0.941932	0.919058	7.80724	-3.27458	0.962832	1.13132	1.04708	8.87951	-4.95679	0.36968	0.471688	0.420684
		1576	-1.10545	-11.8929	0.42349	0.467926	0.445708	-1.61299	-12.5287	0.723647	0.747947	0.735797	0.11306	-9.35096	0.334017	0.355364	0.34469
		1577	7.67547	-11.6215	0.410707	0.383979	0.397343	-6.69301	14.6311	0.272015	0.319992	0.296004	-11.8221	21.5505	0.268329	0.281475	0.274902
		1578	0.509971	-0.211962	0.118224	0.131048	0.124636	0.395293	-0.411301	0.204407	0.22428	0.214343	-1.30168	0.0597789	0.361514	0.353233	0.357374
		1579	6.30301	-8.44652	0.396685	0.350219	0.373452	-0.953535	1.10312	0.938395	0.897351	0.917873	-5.2469	10.5477	0.194802	0.162192	0.178497
		1580	-11.3944	2.17501	0.199651	0.321334	0.260492	3.73735	2.9863	0.378423	0.803798	0.59111	-7.54563	13.3662	0.172986	0.214329	0.193657
		1581	3.73164	1.76342	0.69138	0.774047	0.732713	2.14627	-0.310554	0.358251	0.425534	0.391893	-0.54312	-1.35889	0.132267	0.146188	0.139228
		1582	13.1869	32.5601	1.91291	1.76319	1.83805	-9.21719	7.45416	0.310577	0.373412	0.341994	2.09406	0.651209	0.219152	0.240511	0.229831
		1583	0.349444	0.670256	3.79171	3.05026	3.42098	1.05747	1.87768	0.465732	0.514411	0.490072	-5.81018	3.045	0.301598	0.333289	0.317443
		1584	-0.455165	-13.1207	0.286476	0.329836	0.308156	11.3728	-9.16742	1.76241	1.59126	1.67684	6.55387	-0.866277	0.543756	0.581956	0.562856
		1585	5.79423	1.43322	0.948105	0.881707	0.914906	-1.81456	-1.15716	0.459182	0.485956	0.472569	19.2122	-1.77723	2.07024	1.8546	1.96242
		1586	3.89202	8.53134	0.337867	0.335834	0.336851	1.23802	2.33767	0.061731	0.0645803	0.0631556	-3.76582	-12.0981	0.479484	0.539476	0.50948
		1587	-0.109699	-0.607031	0.247098	0.236186	0.241642	-1.04536	-0.837401	0.174814	0.17211	0.173462	0.354791	-2.72577	0.799934	0.818608	0.809271
		1588	3.51717	-1.18897	0.252058	0.278725	0.265392	-2.04019	1.02405	0.193736	0.196364	0.19505	-5.71956	-10.3635	0.386518	0.350492	0.368505
		1589	2.46237	-5.28942	0.577822	0.59804	0.587931	3.25634	6.65816	0.599187	0.665869	0.632528	-5.6733	-6.18384	0.254757	0.274804	0.26478
		1590	-2.62708	3.5768	0.318734	0.314327	0.316531	2.63324	-0.0850362	0.370395	0.400323	0.385359	0.192154	4.0262	0.253064	0.275955	0.264509
		1591	-9.18508	-159.822	3.91241	3.7396	3.82601	-7.18933	-147.41	0.250547	0.275962	0.263255	-8.10983	-147.769	0.123189	0.134907	0.129048
		1592	4.9646	12.5665	0.510628	0.457513	0.48407	0.261881	-0.2683	0.393186	0.364981	0.379084	-1.87997	-4.15996	0.826932	0.787186	0.807059
		1593	8.88652	1.03297	0.202873	0.193388	0.19813	6.67043	-0.125284	0.187085	0.156555	0.17182	-7.34882	-3.74853	0.262263	0.236275	0.249269
		1594	5.13471	0.916767	0.466611	0.458158	0.462384	8.78879	1.57344	0.52435	0.508955	0.516652	10.5674	3.43873	1.07276	1.07833	1.07554
		1595	10.1251	-5.59634	0.56927	0.565828	0.567549	13.1407	-5.96456	0.389552	0.379794	0.384673	15.2794	-4.07891	0.938173	0.927381	0.932777
		1596	5.49492	-0.073862	0.255583	0.258438	0.257011	-4.86691	0.717342	0.22674	0.233839	0.23029	-6.77051	2.06136	0.201953	0.208491	0.205222
		1597	-1.08125	-0.154334	0.0671778	0.0726875	0.0699327	-1.06456	-0.141211	0.0377949	0.0404431	0.039119	-0.107779	-0.503296	0.0784429	0.0808757	0.0796593
		1598	6.57054	-0.346786	0.138922	0.131456	0.135189	-16.0978	1.08417	0.491839	0.468385	0.480112	-6.96252	-1.1985	10.1475	7.17013	8.65884
		1599	-1.70573	-0.803707	0.144898	0.118302	0.1316	9.09416	8.31228	0.360435	0.412767	0.386601	7.58047	2.20465	0.523622	0.634893	0.579257
		1600	0.824555	1.43512	0.601982	0.634375	0.618179	-1.09618	0.462277	0.683072	0.685505	0.684289	-3.59143	-4.28609	0.260004	0.254195	0.257099
		1601	-4.8753	-0.129087	0.122922	0.128183	0.125553	0.566105	-2.52056	0.353071	0.361677	0.357374	2.90275	-5.25579	0.166806	0.174737	0.170771
		1602	-10.5365	-1.1295	0.653697	0.639467	0.646582	13.321	3.94457	1.31116	1.12071	1.21594	-24.8233	12.4032	1.99188	1.652	1.82194
		1603	10.0262	-2.63003	3.86886	3.91443	3.89164	-0.0156849	9.77196	1.72131	1.44045	1.58088	2.02361	2.7055	0.610653	0.549811	0.580232
		1604	2.37168	19.2695	0.825359	0.6864	0.755879	2.82174	-1.71763	0.265909	0.263861	0.264885	4.72481	4.82928	3.5018	3.72204	3.61192
		1605	3.17593	-5.40823	0.558087	0.583613	0.57085	-0.720601	1.70685	0.452483	0.46353	0.458007	-2.40848	-9.79891	2.09974	1.87679	1.98827
		1606	-4.09917	-11.203	0.259632	0.255785	0.257709	1.79218	-5.51559	0.300658	0.30943	0.305044	10.9307	2.32709	1.18835	1.24397	1.21616
		1607	10.6105	-1.56979	1.0388	1.14067	1.08973	1.49786	-0.770423	0.604776	0.574403	0.589589	-2.69953	-0.100436	0.311185	0.310859	0.311022
		1608	-0.202323	-1.05577	0.168395	0.172641	0.170518	3.45759	-0.348113	0.235228	0.231047	0.233138	3.06883	-0.681625	0.453448	0.426991	0.44022
		1609	0.550339	15.9825	0.29381	0.321009	0.307409	-3.53646	2.83781	1.91637	2.12401	2.02019	-0.713242	-10.2196	0.19273	0.238573	0.215651
		1610	-5.70813	6.70389	0.217091	0.250936	0.234014	-3.01622	-2.60375	0.620253	0.636221	0.628237	0.342828	-10.5855	0.217141	0.197435	0.207288
		1611	-3.27422	-6.48527	0.697381	0.73434	0.71586	4.40339	3.27348	1.23617	1.39108	1.31362	-5.13612	-5.50286	2.25565	2.62716	2.4414
		1612	-1.33922	4.04261	0.396413	0.446799	0.421606	0.250143	2.45792	0.166982	0.188614	0.177798	1.23139	1.23241	0.303119	0.345416	0.324268
		1613	-0.514263	7.51657	0.407677	0.434789	0.421233	-0.316828	9.10969	0.749382	0.80834	0.778861	-1.89382	7.18371	1.60784	1.59983	1.60383
		1614	0.169155	0.547469	0.674598	0.674899	0.674748	-0.103635	0.26886	0.136423	0.133052	0.134737	-1.30071	-1.47927	0.0667887	0.0741405	0.0704646
		1615	34.0905	9.28228	0.904907	0.922033	0.91347	30.4947	0.335522	0.521546	0.561056	0.541301	48.7878	-2.64194	1.10375	1.26597	1.18486
		1616	-5.8503	-1.33566	0.216863	0.212291	0.214577	2.72867	0.487679	0.319676	0.332934	0.326305	14.7137	-2.07602	0.438597	0.452406	0.445501
		1617	-3.76871	-5.35552	0.373074	0.367241	0.370158	-4.11531	-4.88572	0.186929	0.227494	0.207211	-3.68319	-5.23539	0.0812232	0.110256	0.0957394
		1618	-19.1104	5.96606	0.412584	0.422357	0.41747	7.18715	-3.6115	0.770489	0.812275	0.791382	-1.80186	4.11603	0.792465	0.662279	0.727372
		1619	-3.22321	0.851421	2.81298	2.63781	2.7254	-1.33214	-0.0630048	0.328021	0.338337	0.333179	1.49517	2.54795	0.27557	0.279221	0.277395
		1620	6.27471	6.49571	0.239706	0.208492	0.224099	3.15008	3.49645	0.198504	0.174345	0.186425	-22.7064	-3.24797	2.90771	2.89069	2.8992
		1621	7.02091	0.200833	2.12468	2.07541	2.10005	-0.340331	2.28594	0.909158	0.976615	0.942887	2.38213	0.612432	1.07455	1.10603	1.09029
		1622	-1.05308	-0.690212	0.536004	0.502709	0.519357	-2.2756	-0.835226	0.285754	0.287301	0.286527	0.571076	3.05605	0.19647	0.18615	0.19131
		1623	0.113896	0.242275	0.358291	0.344184	0.351238	-3.486	0.086753	0.536879	0.525233	0.531056	-0.292522	-2.21964	0.527999	0.49905	0.513525
		1624	9.33869	-1.31573	9.65067	11.1363	10.3935	0.96013	-0.628883	0.381975	0.389434	0.385704	-3.34761	1.62326	1.23132	1.1817	1.20651
		1625	-1.67975	-3.84787	1.05683	1.04852	1.05267	-1.06433	-3.07752	0.685448	0.712003	0.698726	-3.00975	-2.02051	0.47397	0.500174	0.487072
		1626	-0.732185	0.671483	0.116407	0.113564	0.114986	2.41602	-2.17136	0.689594	0.644093	0.666843	7.04421	-9.89058	2.34068	2.00338	2.17203
		1627	-1.36764	-4.62872	0.621395	0.633893	0.627644	2.0013	-3.75837	1.1581	1.13107	1.14459	5.35913	-3.83203	0.553871	0.542723	0.548297
		1628	-1.74145	-12.9811	0.257601	0.19962	0.228611	5.56847	-10.2911	1.61109	1.2257	1.41839	3.05967	13.4254	1.50954	1.73163	1.62058
		1629	-6.64367	3.46864	1.77315	1.43107	1.60211	-1.1184	-0.732928	0.241705	0.243538	0.242622	1.67998	9.88765	0.335081	0.364257	0.349669
		1630	4.17365	-5.38586	0.238002	0.228107	0.233055	6.64041	-5.07504	5.43863	5.20547	5.32205	22.7486	0.294297	0.952226	0.804526	0.878376
		1631	-4.31052	-17.9008	0.407865	0.451532	0.429698	-15.799	-18.8269	0.276835	0.323566	0.3002	-9.32984	-210.257	0.736496	1.54514	1.14082
		1632	0.903964	2.28493	0.30442	0.350396	0.327408	-3.33428	3.21827	1.19675	1.4453	1.32103	-4.91916	-1.34346	0.49478	0.501348	0.498064
		1633	-48.4484	-18.1693	0.292311	0.289854	0.291082	-47.4428	-8.60761	0.242197	0.266172	0.254185	-60.1284	8.75212	0.275249	0.315215	0.295232
		1634	-0.335671	-13.0473	0.279641	0.305097	0.292369	-7.74431	-11.1396	0.809093	0.824565	0.816829	-1.78522	8.84522	0.248381	0.283232	0.265807
		1635	-3.22883	1.27066	0.179292	0.185851	0.182572	-14.1429	2.48764	0.881976	0.863048	0.872512	-34.935	4.04533	7.59646	8.29017	7.94331
		1636	1.20422	16.3811	1.39398	1.42463	1.40931	-6.03573	5.21093	0.505785	0.493631	0.499708	-19.6384	-0.469874	0.443029	0.293574	0.368302
		1637	6.03458	1.53568	4.81668	3.86042	4.33855	3.10092	0.448003	0.433565	0.445808	0.439686	-19.1328	-18.6416	4.65691	4.57813	4.61752
		1638	54.445	-94.2372	0.439357	0.489675	0.464516	45.5571	-80.3443	0.371222	0.422921	0.397071	-10.0105	20.5246	0.341822	0.391739	0.366781
		1639	-155.401	-42.9837	5.79523	2.77007	4.28265	1.70973	-1.16398	0.72738	0.659669	0.693525	-2.78573	-2.89458	0.24404	0.254773	0.249407
		1640	39.6726	6.12953	0.178341	0.179852	0.179097	40.7636	5.73259	0.185637	0.183521	0.184579	40.7134	7.99193	0.688883	0.684917	0.6869
		1641	6.00124	16.7826	0.427086	0.457396	0.442241	0.449262	0.966739	0.294771	0.300049	0.29741	-7.28566	-3.14296	0.186744	0.220214	0.203479
		1642	-7.76126	11.0104	1.03627	1.23128	1.13378	-1.81371	6.63448	2.17256	2.33953	2.25604	1.88209	-3.35932	0.778243	0.820281	0.799262
		1643	2.24921	3.75654	0.228865	0.247839	0.238352	1.89479	0.022372	0.167662	0.185927	0.176795	-0.0921762	1.55787	0.127578	0.136205	0.131891
		1644	-5.65914	-3.95782	3.17785	3.04517	3.11151	22.9355	20.5387	0.766832	0.760945	0.763888	17.4111	20.7279	0.317717	0.367263	0.34249
		1645	1.21194	-0.427485	0.712696	0.743057	0.727876	-2.78095	-0.229699	0.36327	0.395374	0.379322	7.00899	4.6101	0.853757	0.837903	0.84583
		1646	-27.3504	-40.2439	0.0663774	0.0688572	0.0676173	-30.0243	-39.3073	0.403081	0.35116	0.377121	-34.2786	-35.8407	0.967915	0.695816	0.831865
		1647	-0.112212	5.36257	0.511206	0.576153	0.543679	-0.372467	5.024	0.299816	0.342866	0.321341	-1.17589	6.83088	0.495528	0.538424	0.516976
		1648	-1.64936	3.63586	0.225585	0.274482	0.250033	2.24119	-4.65413	0.25542	0.297564	0.276492	5.37808	-5.01741	1.30312	1.49008	1.3966
		1649	-16.3393	8.9915	2.3309	2.25127	2.29109	12.3509	-7.95749	1.72667	1.94079	1.83373	15.9346	13.989	0.327032	0.395612	0.361322
		1650	1.95287	-2.4479	0.554754	0.578833	0.566794	1.52348	-2.08133	0.448471	0.475206	0.461838	-2.5592	10.2756	0.641163	0.531923	0.586543
		1651	4.62227	12.7547	0.293643	0.298378	0.296011	3.85378	7.96373	0.503474	0.533414	0.518444	-4.93558	1.54801	1.35594	1.47705	1.41649
		1652	-4.39985	2.17151	0.364849	0.382168	0.373508	7.20788	-1.91693	0.327118	0.334515	0.330817	0.158243	3.79837	1.26369	1.55843	1.41106
		1653	-1.25088	0.589899	0.485177	0.51144	0.498308	-1.71054	-2.52505	0.631404	0.688332	0.659868	-0.439383	-4.89763	3.26072	3.5576	3.40916
		1654	-0.737482	-6.71086	2.97547	3.16734	3.0714	-6.02796	-8.43067	0.930357	0.991474	0.960916	-6.222	-7.6922	0.464896	0.520423	0.492659
		1655	2.63423	-1.02717	0.231429	0.238981	0.235205	6.03752	-2.27687	0.219592	0.229759	0.224675	8.5522	-5.18805	0.214108	0.227815	0.220962
		1656	-1.49049	0.500755	0.216674	0.235026	0.22585	-1.78973	-1.36206	0.10237	0.106717	0.104544	1.2692	1.79724	0.217326	0.234427	0.225877
		1657	-3.11037	5.99173	0.318053	0.314694	0.316373	-3.19599	5.15131	0.19887	0.191952	0.195411	6.98001	1.75702	0.537482	0.605229	0.571356
		1658	-7.02109	16.3645	0.268494	0.292895	0.280695	-3.17979	8.37511	0.876525	1.00213	0.939328	-0.14927	-8.79788	0.336099	0.357495	0.346797
		1659	4.39409	11.779	0.350362	0.520505	0.435433	-6.55616	29.069	0.582296	0.620056	0.601176	-1.00597	15.227	0.301783	0.496767	0.399275
		1660	-14.2328	-1.69811	4.8494	3.78225	4.31582	-3.25377	-1.81414	1.4734	1.81466	1.64403	-3.74484	-2.04052	1.01647	1.16414	1.0903
		1661	66.7709	14.1139	22.3336	21.1902	21.7619	-2.58814	-5.44463	1.44841	1.47673	1.46257	1.03781	-8.27909	7.68026	6.67509	7.17767
		1662	0.681101	-0.000674971	0.366334	0.375928	0.371131	-3.39291	-4.96083	0.964783	0.974727	0.969755	0.495561	5.92628	0.420309	0.50324	0.461774
		1663	5.04941	-15.6974	1.90949	1.79357	1.85153	-2.10728	2.98845	0.595418	0.638541	0.616979	-7.54855	2.92328	4.36638	4.48192	4.42415
		1664	-0.20061	-0.353454	0.0785072	0.0880135	0.0832604	2.2256	-1.37602	0.147358	0.143032	0.145195	10.197	-5.16135	0.427113	0.438208	0.43266
		1665	3.3323	-2.97298	1.11671	1.24441	1.18056	-0.449622	-4.39324	0.711032	0.792883	0.751958	-0.991285	-1.34395	0.467574	0.58538	0.526477
		1666	0.0855524	-18.6866	0.680763	0.707431	0.694097	-24.2639	115.339	4.12819	11.3559	7.74204	-43.8267	142.874	2.86827	2.25844	2.56335
		1667	-2.47018	-10.012	0.451304	0.460203	0.455753	-5.89613	2.17349	0.323808	0.323191	0.3235	1.23486	5.58635	1.47735	1.42985	1.4536
		1668	-0.681564	3.51765	0.413066	0.423844	0.418455	7.54099	1.36878	1.235	1.16167	1.19833	11.675	7.11405	0.262181	0.273724	0.267952
		1669	-0.847418	0.174165	0.161688	0.172867	0.167277	0.726897	0.726247	0.297369	0.316387	0.306878	4.75797	4.77036	1.37885	1.47418	1.42651
		1670	3.12603	3.58465	1.36036	1.40206	1.38121	2.81976	1.6107	0.534722	0.555392	0.545057	0.0997921	-1.66602	0.762868	0.860373	0.811621
		1671	-0.958926	1.68975	4.27966	4.39246	4.33606	0.476237	0.45444	0.515646	0.523617	0.519631	0.48227	-0.564986	0.365834	0.339565	0.352699
		1672	-3.16714	-5.31606	2.96889	2.58197	2.77543	-2.89996	-3.80555	0.510532	0.529618	0.520075	-3.69827	-5.36003	1.28393	1.33596	1.30994
		1673	-8.53271	-3.09735	0.440667	0.435472	0.43807	-13.494	0.615755	2.74951	2.77132	2.76041	11.8503	-0.707304	0.719885	0.666454	0.69317
		1674	-26.5776	-29.0441	11.2587	4.20747	7.73309	6.21239	1.54931	0.740017	0.736421	0.738219	0.495465	-3.55821	0.347819	0.354383	0.351101
		1675	-2.38802	-5.21242	0.520263	0.530074	0.525169	0.834582	-0.404275	0.638433	0.669222	0.653827	-2.92091	7.26456	0.492807	0.519348	0.506078
		1676	2.24381	16.7418	0.873885	1.03233	0.953109	0.293058	10.4235	0.488029	0.494378	0.491204	0.461873	14.5614	0.837436	0.94751	0.892473
		1677	-6.40582	1.97193	2.70055	3.6501	3.17533	-5.22899	-0.646752	1.09914	1.19551	1.14733	-4.48772	-1.4575	0.581544	0.5983	0.589922
		1678	0.359948	2.9551	1.11299	1.05988	1.08643	1.63917	-4.33465	0.291739	0.285614	0.288677	-11.238	1.69862	0.293065	0.295674	0.29437
		1679	3.79053	1.12808	0.444057	0.506167	0.475112	-1.4198	-8.08751	1.41091	1.58098	1.49595	16.2988	-22.4583	8.90666	13.3179	11.1123
		1680	-22.4424	-7.88705	8.31489	6.32893	7.32191	0.0301181	-10.5974	1.21025	1.28056	1.2454	-2.99798	-2.30363	0.50966	0.539652	0.524656
		1681	10.0327	-4.48647	1.10915	1.16509	1.13712	-3.34972	0.502581	0.184134	0.200771	0.192453	-1.47735	0.537108	0.211477	0.209639	0.210558
		1682	-3.1163	1.60599	0.412952	0.41372	0.413336	-5.01694	2.13516	0.686239	0.742532	0.714386	-1.19055	8.2742	0.582331	0.575081	0.578706
		1683	-14.8592	-10.4239	0.843354	0.797372	0.820363	-11.3919	2.0445	1.75371	1.66428	1.709	-17.1434	10.7288	0.527319	0.552506	0.539912
		1684	-6.60112	-19.0583	0.727048	0.731055	0.729052	-9.65998	-16.2838	0.170568	0.168598	0.169583	-13.0236	-13.8296	0.167529	0.157972	0.16275
		1685	-0.154864	4.19981	1.06434	1.01802	1.04118	-3.28934	-1.7863	0.20047	0.19357	0.19702	-6.3688	-4.94002	0.288381	0.245813	0.267097
		1686	-12.5973	-3.28603	1.70818	1.58551	1.64685	-5.27496	-4.09733	0.268632	0.26423	0.266431	2.23997	1.89694	0.204341	0.185836	0.195089
		1687	-0.803339	-0.495977	0.323764	0.365328	0.344546	1.44175	5.33823	1.17705	1.1285	1.15277	-4.70908	21.9087	10.8699	9.16743	10.0187
		1688	-21.6285	-30.0439	0.44747	0.472654	0.460062	-22.8893	-24.1613	0.495765	0.547097	0.521431	-16.7987	-10.0452	5.01757	5.63198	5.32478
		1689	0.878988	9.70152	1.37783	1.39946	1.38864	0.286263	-5.42723	0.626864	0.623469	0.625166	-3.42404	-3.81498	1.13156	0.997724	1.06464
		1690	-11.4847	1.03348	1.47447	1.28119	1.37783	-12.5133	2.476	0.605796	0.553008	0.579402	-14.9864	3.64925	2.04073	1.73387	1.8873
		1691	2.23153	-1.57481	0.242075	0.246746	0.244411	8.86867	-1.21832	0.639096	0.648852	0.643974	6.51245	5.88563	0.797458	0.833619	0.815539
		1692	3.32738	-0.0425647	2.04933	2.06422	2.05678	-2.90803	-0.74227	0.391091	0.426883	0.408987	1.97599	-0.080764	0.474175	0.452898	0.463536
		1693	-9.4667	11.6519	11.3145	7.57139	9.44297	0.234014	-0.0277541	0.512461	0.561179	0.53682	-1.67565	0.499118	0.57566	0.643929	0.609794
		1694	-18.7905	-0.411461	6.28338	3.43606	4.85972	-9.18378	1.18916	1.37211	1.44953	1.41082	-3.2159	0.48639	0.120027	0.110601	0.115314
		1695	3.21858	1.21277	0.163122	0.172738	0.16793	-0.210753	-1.79542	0.277859	0.279823	0.278841	-0.970507	-1.46045	0.631032	0.612353	0.621692
		1696	15.56	117.238	0.189493	0.194304	0.191898	17.4633	113.319	1.27067	1.26035	1.26551	13.9988	110.683	0.225869	0.237218	0.231544
		1697	2.28294	-6.20251	0.424412	0.469741	0.447077	-1.23071	1.37242	0.8982	0.93632	0.91726	-0.562526	7.53004	0.325747	0.330537	0.328142
		1698	-3.24952	-1.58212	0.291616	0.300334	0.295975	1.4483	-1.67445	0.992031	1.00249	0.997262	-0.630419	-7.86432	0.754952	0.750824	0.752888
		1699	14.1362	-6.17326	0.552195	0.468138	0.510166	2.72854	2.45014	1.73303	1.77815	1.75559	-8.28655	1.21726	0.335745	0.306473	0.321109
		1700	0.345489	5.98033	0.864317	0.834764	0.849541	2.5487	3.52034	1.01242	0.956641	0.984531	1.12337	-1.61599	0.438108	0.450427	0.444267
		1701	-4.98788	-3.31505	0.772009	0.731218	0.751614	-5.22696	-6.2336	0.819191	0.810458	0.814824	-4.58546	-9.8155	0.47369	0.467857	0.470773
		1702	-1.57873	-2.12814	0.884179	0.840157	0.862168	-1.47854	-0.87642	0.250699	0.239483	0.245091	0.590858	-0.211846	0.183151	0.179816	0.181483
		1703	3.72744	3.63636	3.16085	4.424	3.79242	-1.46571	3.71055	0.690314	0.759671	0.724992	-0.172631	2.44587	0.841056	0.916303	0.878679
		1704	-46.6536	-55.8474	0.534907	0.55222	0.543563	-55.6964	-24.0109	1.85441	2.85864	2.35652	-20.4016	75.127	2.22088	3.60883	2.91486
		1705	-4.76152	5.88077	1.60895	0.999694	1.30432	0.0838337	-1.8001	0.256561	0.259292	0.257926	6.83535	-5.11845	6.12835	4.3365	5.23242
		1706	38.1965	-4.61984	1.02874	0.228984	0.628861	37.5469	-2.38443	0.385002	0.0869776	0.23599	-183.169	9.74852	0.81423	0.107069	0.460649
		1707	2.48049	7.21511	3.92266	3.97958	3.95112	3.10832	2.16205	6.54939	6.81943	6.68441	-5.95396	-1.02239	2.73751	2.88403	2.81077
		1708	-0.543298	-0.211727	0.133747	0.135637	0.134692	1.86713	-1.10091	0.355627	0.359574	0.3576	5.09439	0.249987	0.300944	0.311259	0.306101
		1709	-8.41722	7.87068	0.190601	0.215712	0.203157	-1.40689	-0.279099	0.889514	0.923915	0.906715	2.60429	-4.98603	0.25535	0.265395	0.260373
		1710	-6.99725	-1.0921	0.318092	0.336737	0.327414	4.44443	-3.93013	0.675762	0.645795	0.660779	5.44084	4.78515	3.74383	3.40352	3.57367
		1711	-0.820037	1.31682	1.22642	1.20429	1.21536	1.18817	1.13307	0.400931	0.40659	0.40376	-0.222081	0.471105	0.275652	0.291443	0.283547
		1712	6.58169	-3.77085	1.42025	1.25683	1.33854	-5.39137	-2.82128	0.472979	0.476489	0.474734	-4.29252	-0.0336514	0.195851	0.197655	0.196753
		1713	-11.9755	12.586	0.56423	0.641405	0.602817	10.4275	-4.71472	2.03214	2.27464	2.15339	-2.4165	8.1131	0.787953	0.959218	0.873585
		1714	10.1619	5.68609	4.65004	4.88621	4.76813	11.0961	-7.83065	2.42663	2.98758	2.70711	-6.92014	-13.0002	3.25798	3.76023	3.5091
		1715	-6.52151	0.43616	0.820522	0.819036	0.819779	3.17999	1.72342	3.88206	4.43829	4.16017	-1.38476	1.96376	0.609284	0.561218	0.585251
		1716	-0.358011	-2.02817	1.54593	1.60026	1.5731	0.774663	-0.245327	0.521148	0.548703	0.534925	0.448089	1.5911	0.232757	0.241175	0.236966
		1717	47.3125	12.9629	7.10364	4.25839	5.68101	57.5524	37.4168	1.00069	0.796052	0.898373	-102.321	-34.6169	2.18126	1.48228	1.83177
		1718	0.00357241	0.0608584	0.35812	0.395371	0.376745	-0.0311962	0.0674527	0.423134	0.469033	0.446084	-0.440326	0.443005	0.955112	1.04156	0.998337
		1719	-3.39978	4.15812	0.706216	0.738888	0.722552	-2.44746	3.72879	2.55013	2.42819	2.48916	0.655636	-1.09324	0.388001	0.427389	0.407695
		1720	10.3547	16.2965	27.6941	12.3497	20.0219	3.06015	-1.14789	0.509878	0.539161	0.52452	-2.64624	-16.1666	1.97952	2.50551	2.24252
		1721	-7.64694	-1.73299	0.856081	0.844415	0.850248	-5.45015	-1.64295	0.917035	0.910833	0.913934	-4.66846	11.8182	5.49944	4.64454	5.07199
		1722	-3.73415	4.52885	3.19371	3.11083	3.15227	-0.649622	1.45162	0.379026	0.392659	0.385842	0.214159	-0.382884	0.218123	0.221152	0.219638
		1723	1.1546	3.24864	3.66085	3.541	3.60093	2.19856	0.885813	0.984469	0.993282	0.988875	-0.263615	0.681282	0.36711	0.364296	0.365703
		1724	8.6707	-1.26783	0.617957	0.600395	0.609176	-2.23079	-1.95889	0.475305	0.495077	0.485191	11.2803	3.49811	5.67204	5.22016	5.4461
		1725	0.917157	-0.381647	1.15485	1.19464	1.17475	0.447567	-0.0105954	0.38247	0.377645	0.380058	-1.64268	0.509248	0.328246	0.320162	0.324204
		1726	-1.38051	-5.15655	3.45508	2.09304	2.77406	-0.886331	-5.8775	0.563484	0.584662	0.574073	0.510795	-3.76843	0.438434	0.454791	0.446613
		1727	-4.23124	-32.3662	0.628458	0.6313	0.629879	-1.43655	-0.306274	2.39916	2.97231	2.68574	4.02364	25.0293	0.380053	0.434497	0.407275
		1728	5.4057	-1.6099	2.25956	2.35938	2.30947	6.06977	1.1112	2.41108	2.62174	2.51641	-11.5813	-21.4901	7.39384	6.94241	7.16812
		1729	-3.84972	-21.3559	3.80211	2.89972	3.35092	-2.57912	-9.13832	1.83254	2.27363	2.05309	-1.40933	-7.66129	0.469577	0.530477	0.500027
		1730	-1.59767	0.895675	2.91636	2.3062	2.61128	0.932917	-1.84187	1.55349	1.52466	1.53907	-0.342666	1.06018	0.384185	0.371517	0.377851
		1731	131.136	-138.266	10.8405	9.71329	10.2769	0.892083	-5.00533	1.69245	1.57881	1.63563	-7.43871	1.35693	0.16889	0.192073	0.180482
		1732	-96.2027	-11.5261	0.333207	0.306307	0.319757	-96.8785	-9.07179	0.514775	0.512606	0.51369	-97.2108	-20.5592	2.13702	2.26525	2.20114
		1733	-14.1982	-8.67881	4.41089	4.31906	4.36498	4.27964	-5.15848	0.36187	0.37031	0.36609	5.94233	-5.40092	0.261604	0.271028	0.266316
		1734	-7.68065	-9.98755	0.83947	0.833643	0.836557	-3.6364	-1.96711	0.430654	0.40413	0.417392	9.79919	4.45276	0.816421	0.898729	0.857575
		1735	-0.556376	-5.2228	1.30529	1.40613	1.35571	-1.71603	-2.51586	1.17079	1.19796	1.18438	-3.11163	-2.45687	0.678311	0.742968	0.71064
		1736	1.47016	3.68332	1.55352	1.34323	1.44837	0.286069	1.14707	0.513065	0.47446	0.493762	-0.519623	0.877591	0.26125	0.240614	0.250932
		1737	-0.280926	1.65975	0.170136	0.175114	0.172625	4.61245	-4.01088	0.788757	0.769143	0.77895	6.48056	-11.2729	5.81593	4.63854	5.22724
		1738	-2.83537	10.9845	0.819995	0.937701	0.878848	-0.683243	15.1321	0.35911	0.397187	0.378148	-3.01174	15.6923	1.53381	1.68087	1.60734
		1739	-0.784138	0.0571714	2.52059	3.20511	2.86285	-7.85323	6.88914	4.28732	5.61313	4.95022	11.5892	-28.9038	0.867149	0.882673	0.874911
		1740	0.0120011	0.0861588	0.292517	0.299566	0.296041	2.18631	-2.80022	2.28522	2.47635	2.38079	-0.0686885	0.270884	4.06156	3.2797	3.67063
		1741	-5.90196	-1.76803	0.140283	0.143996	0.14214	4.77529	1.79082	0.298453	0.317822	0.308138	6.94549	1.9254	0.144583	0.148875	0.146729
		1742	0.425914	6.70642	1.40041	1.38249	1.39145	3.97246	5.68903	4.54583	4.28712	4.41648	-2.29219	-0.390063	0.419116	0.437599	0.428358
		1743	8.19099	-3.82815	0.38271	0.362656	0.372683	5.75771	-2.82146	1.58638	1.28644	1.43641	3.48234	0.974173	0.466031	0.436564	0.451297
		1744	-4.26074	-2.04978	0.268436	0.25758	0.263008	-5.72665	0.251506	1.58971	1.77293	1.68132	-5.4673	1.41495	0.29902	0.252373	0.275696
		1745	0.323016	0.785778	0.0822179	0.0856484	0.0839331	-1.71928	-2.1043	0.205394	0.218706	0.21205	-5.73752	-3.48748	0.520914	0.575334	0.548124
		1746	-4.89208	-0.0968276	0.191449	0.204344	0.197896	1.43923	-2.96828	0.47071	0.513101	0.491906	-1.63879	2.02821	1.36378	1.25074	1.30726
		1747	-6.21565	-8.58878	0.964335	0.838458	0.901396	-6.3476	-0.957186	1.14803	1.14146	1.14475	0.950625	0.117789	0.19189	0.190722	0.191306
		1748	-1.96389	2.51832	7.40355	7.35132	7.37744	7.32395	5.73494	0.571041	0.533952	0.552497	5.69093	3.97072	0.342505	0.33196	0.337232
		1749	-1.74217	5.47285	3.57457	2.52624	3.05041	0.0604874	-0.0753493	0.49691	0.51072	0.503815	-0.415394	0.0199048	0.299756	0.315135	0.307446
		1750	-4.06352	5.87549	0.718344	0.777317	0.74783	5.67341	-1.06969	3.10014	3.02129	3.06071	10.6238	-11.1426	0.621918	0.660391	0.641154
		1751	5.9446	7.76949	0.353101	0.35872	0.355911	2.98367	7.74006	1.78643	1.83641	1.81142	-5.15491	-8.20951	0.300587	0.30329	0.301939
		1752	-0.511368	-1.14516	0.176667	0.179879	0.178273	-0.0916229	0.0755657	0.111146	0.111557	0.111351	0.43228	0.948846	0.078583	0.0792801	0.0789315
		1753	11.6218	10.0359	3.27273	3.49266	3.3827	-3.53613	-5.8012	0.514308	0.533333	0.523821	118.247	194.925	10.2424	15.5727	12.9075
		1754	-55.0194	29.0066	1.78263	1.03352	1.40807	39.7261	-21.7662	0.371892	0.269973	0.320932	-32.8009	19.1315	0.20965	0.160764	0.185207
		1755	-4.80501	13.4279	5.32335	3.96354	4.64344	-5.7112	7.32367	3.08697	2.89912	2.99304	-4.28712	7.91729	0.441087	0.470659	0.455873
		1756	1.25958	-9.36411	0.564952	0.597463	0.581207	1.11641	-8.83388	0.735981	0.791449	0.763715	-0.145213	-5.01609	0.67699	0.756191	0.716591
		1757	0.849268	-0.235613	0.771607	0.772856	0.772232	-0.93574	0.566083	0.339181	0.325956	0.332569	-0.0534263	0.527148	0.35542	0.374251	0.364835
		1758	-0.105067	-2.40297	0.436836	0.421623	0.429229	-6.61893	9.4418	3.32803	3.85913	3.59358	-3.89339	14.4087	0.976768	0.978985	0.977877
		1759	2.14901	3.89517	2.35143	1.89839	2.12491	2.77254	1.8212	0.537659	0.604261	0.57096	-0.652931	0.598722	0.381421	0.406751	0.394086
		1760	14.002	2.74002	0.550401	0.538514	0.544458	9.24479	-2.91542	0.754366	0.784671	0.769518	5.90479	-11.936	0.221533	0.20754	0.214537
		1761	71.5409	-136.019	12.6915	13.0291	12.8603	87.8967	-207.415	0.724902	0.985154	0.855028	9.48677	-8.8314	0.18146	0.198004	0.189732
		1762	-0.185671	-5.22029	2.12122	2.20808	2.16465	-0.449214	0.790261	0.446982	0.452254	0.449618	0.0280849	0.154803	0.243094	0.258955	0.251024
		1763	-13.8103	-1.21218	0.359948	0.373726	0.366837	-12.3247	-4.81074	0.916438	0.99603	0.956234	-5.13442	-11.7688	0.239562	0.218293	0.228927
		1764	-0.397771	0.698621	0.922772	1.14546	1.03412	3.19471	0.939113	2.60787	1.50663	2.05725	0.994951	3.03504	0.298382	0.265846	0.282114
		1765	-0.0086742	-2.56312	0.922772	1.14546	1.03412	3.5838	-2.32263	2.60787	1.50663	2.05725	1.38405	-0.226699	0.298382	0.265846	0.282114
		1766	-10.8423	3.22346	1.11032	1.11899	1.11466	-1.73103	-0.209339	0.486766	0.497886	0.492326	-0.217755	-0.591293	0.371782	0.350668	0.361225
		1767	-15.8734	1.85821	2.54198	3.41543	2.9787	1.30492	-0.28072	0.142251	0.147098	0.144675	-0.503742	0.249576	0.117062	0.118967	0.118014
		1768	-1.31487	0.22894	0.130163	0.132284	0.131223	0.187951	-0.0499982	0.0848522	0.0874962	0.0861742	-0.0267549	0.224619	0.0785653	0.0820084	0.0802869
		1769	-3.60253	7.38553	0.533991	0.58497	0.55948	2.45123	-1.00126	0.126877	0.13226	0.129568	-17.3776	-7.30673	0.948096	1.07483	1.01147
		1770	5.63641	1.7438	0.773427	0.872846	0.823137	2.35464	0.356519	0.197989	0.219919	0.208954	-1.21923	-0.408388	0.239395	0.245778	0.242586
		1771	-16.8823	16.454	1.83687	2.28579	2.06133	-11.5721	3.61518	0.972913	1.08614	1.02953	-3.35677	5.93473	0.32674	0.344446	0.335593
		1772	-5.14396	5.90809	0.143602	0.229492	0.186547	3.26934	-1.54053	0.745312	1.18948	0.967396	10.7407	-0.787401	0.423155	0.450555	0.436855
		1773	0.397387	0.514805	0.921305	0.881044	0.901175	1.33912	-0.527801	0.238279	0.244455	0.241367	-2.20234	0.310397	0.260199	0.271346	0.265772
		1774	-5.95659	-9.82971	7.75287	12.4708	10.1118	0.404598	1.52952	1.79037	1.85701	1.82369	-0.0705317	0.457556	0.645997	0.648659	0.647328
		1775	4.65884	3.95886	2.20428	2.1902	2.19724	-0.116919	2.26417	1.36311	1.36312	1.36312	2.64978	-9.27995	4.67928	4.83348	4.75638
		1776	-19.038	13.0846	11.3642	13.401	12.3826	-8.02005	4.18975	0.664331	0.644245	0.654288	-14.9877	5.0689	3.37964	2.24889	2.81427
		1777	-4.6201	-0.286637	0.463208	0.459254	0.461231	3.23023	4.83647	4.74698	4.97161	4.8593	7.96495	3.72471	0.516302	0.520843	0.518572
		1778	-7.69996	24.0828	1.94354	2.62233	2.28294	-0.249343	-1.72619	1.02055	1.38251	1.20153	-1.12951	-7.66092	1.58555	1.97403	1.77979
		1779	-7.75855	6.32137	1.87275	1.21601	1.54438	2.86616	6.51741	0.554893	0.553632	0.554263	1.94502	-0.881868	0.300683	0.323766	0.312224
		1780	-65.5766	-45.3158	19.3585	16.5068	17.9327	-30.9072	44.4836	10.7009	9.88441	10.2926	-0.025464	-35.0938	30.9318	23.3786	27.1552
		1781	5.65652	-1.841	2.96418	3.36492	3.16455	6.79182	1.33725	1.26407	1.22844	1.24625	6.34821	-0.323692	0.623493	0.591908	0.6077
		1782	-0.670345	-0.0778094	1.2137	1.12271	1.16821	1.87167	1.146	0.144072	0.141877	0.142975	-1.13586	-0.015785	0.164538	0.156402	0.16047
		1783	-5.01607	15.6078	0.646825	0.776958	0.711892	-4.14844	15.0662	0.947621	1.141	1.04431	-13.0438	23.4387	2.93093	3.40997	3.17045
		1784	-9.90324	7.23018	0.578309	0.597124	0.587716	-10.6411	8.33263	0.172756	0.176817	0.174787	-10.4785	9.05603	0.365485	0.379218	0.372352
		1785	3.72649	0.190753	1.30991	1.39215	1.35103	3.54593	-1.10766	0.378591	0.38592	0.382256	-0.333154	-1.55416	0.0803472	0.0837655	0.0820564
		1786	2.5705	0.689247	0.538665	0.569199	0.553932	-1.47353	-2.01564	0.309234	0.334586	0.32191	-1.12635	1.90879	0.406164	0.444621	0.425392
		1787	-11.409	13.7339	0.245979	0.270498	0.258239	-3.6613	0.891541	1.35357	1.37849	1.36603	-1.39016	-8.36649	0.280207	0.24077	0.260489
		1788	-29.6654	-7.4756	13.693	6.98093	10.337	22.1982	-18.7319	0.249276	0.28889	0.269083	14.8481	-11.9324	0.391271	0.299044	0.345157
		1789	-0.892705	10.866	1.44292	1.51496	1.47894	-2.93282	6.55695	0.276713	0.261236	0.268975	0.813976	-6.31392	0.114559	0.127056	0.120807
		1790	8.41796	-1.48037	7.10076	6.78735	6.94406	16.6165	6.35175	0.42601	0.42199	0.424	12.1056	6.74002	0.476083	0.477361	0.476722
		1791	-4.93899	0.119832	2.69153	2.68475	2.68814	0.572135	0.848073	0.470918	0.458403	0.464661	-0.27261	-0.153516	0.28597	0.282315	0.284143
		1792	7.79531	2.15954	0.242891	0.251863	0.247377	1.28239	0.786116	0.296473	0.310447	0.30346	-6.06219	-0.895683	0.110321	0.112303	0.111312
		1793	-6.92612	-11.6499	0.529629	0.524303	0.526966	-22.129	27.0237	4.42019	7.34557	5.88288	16.1471	-1.53438	4.58718	3.02506	3.80612
		1794	-0.0690779	-2.53593	1.29152	1.10432	1.19792	-0.461189	0.134665	0.108316	0.114186	0.111251	2.47378	-1.37875	0.533494	0.534582	0.534038
		1795	-1.31895	-21.1677	7.87924	9.75073	8.81499	-7.33099	-0.221226	0.640131	0.69605	0.668091	-7.2519	-1.8055	0.889549	0.922131	0.90584
		1796	-6.97576	-3.46181	0.68385	0.658061	0.670956	-6.1797	-3.87914	0.360673	0.360907	0.36079	-4.32281	-1.54924	0.311061	0.308617	0.309839
		1797	-1.70939	-1.45745	1.88945	2.0415	1.96548	-0.300989	-1.8393	0.33688	0.369231	0.353056	0.461484	0.316149	0.360091	0.372299	0.366195
		1798	3.49792	0.885887	1.49902	1.4384	1.46871	0.759187	-0.346156	0.363437	0.386778	0.375107	0.579296	0.482123	0.343451	0.378161	0.360806
		1799	-3.02928	9.35789	0.725192	0.718828	0.72201	-1.83178	9.59237	0.510232	0.535769	0.523	-1.7001	9.81673	0.597034	0.586959	0.591997
		1800	-2.91479	0.791647	0.648416	0.679718	0.664067	-1.68984	0.666749	0.263758	0.265325	0.264541	2.63205	-1.89495	0.193415	0.212289	0.202852
		1801	-4.42949	12.2171	1.30299	1.52738	1.41519	-2.4719	8.22627	0.36027	0.407501	0.383885	1.24179	12.9558	0.8001	0.795416	0.797758
		1802	-18.9064	-11.9663	0.239309	0.247837	0.243573	-12.9459	-9.04899	0.290476	0.309905	0.30019	-8.96665	-6.85503	0.20439	0.22101	0.2127
		1803	-0.474762	2.54916	0.179069	0.211597	0.195333	6.65956	-8.72474	1.95039	1.00265	1.47652	-0.513699	-10.779	0.220238	0.19902	0.209629
		1804	-5.63065	3.00064	7.39887	6.68925	7.04406	-7.75344	-0.164806	0.900634	1.06846	0.984547	-6.52605	2.41353	0.677252	0.780185	0.728718
		1805	-33.0963	-15.7804	1.72849	1.26289	1.49569	-37.5304	-15.8186	0.509909	0.354475	0.432192	-46.8953	-17.2421	0.703555	0.441807	0.572681
		1806	-104.905	112.63	0.885998	0.969207	0.927603	-76.0023	84.8341	1.46869	1.65504	1.56186	26.0342	-26.3055	0.179822	0.175363	0.177593
		1807	-2.28742	-5.14561	0.169387	0.207209	0.188298	-1.00347	-0.447893	0.187404	0.218366	0.202885	2.50322	7.57159	0.227335	0.237485	0.23241
		1808	2.31576	4.01559	6.27167	6.39228	6.33197	8.97002	9.12862	0.585209	0.642967	0.614088	-9.08136	-0.883561	0.704633	0.691968	0.6983
		1809	-1.1463	-6.40306	0.346946	0.377894	0.36242	1.38997	-1.95238	0.346389	0.370374	0.358382	3.37333	17.4027	0.38777	0.434849	0.411309
		1810	0.875664	0.0139732	0.282111	0.294791	0.288451	0.822719	0.595058	0.147477	0.15334	0.150408	-0.369319	-1.40083	0.41481	0.406324	0.410567
		1811	2.38594	0.395247	0.332537	0.387445	0.359991	-3.24651	-2.71339	0.383231	0.381897	0.382564	-10.0701	-4.75165	3.35085	3.96634	3.6586
		1812	2.1475	2.31565	7.85449	6.17682	7.01566	1.43891	4.8488	1.74167	2.05953	1.9006	0.0877575	-0.440706	0.966915	1.13511	1.05101
		1813	-1.09635	-9.38502	0.302538	0.35714	0.329839	0.625127	-3.23146	0.242656	0.294464	0.26856	0.482882	7.80769	0.205911	0.22746	0.216685
		1814	-4.45843	9.24459	0.694068	0.756284	0.725176	-0.593	2.17286	0.745963	0.838487	0.792225	1.74854	-6.63805	0.155331	0.17307	0.1642
		1815	0.33471	-3.35361	0.282995	0.294103	0.288549	0.300541	-2.75996	0.147675	0.153484	0.15058	-0.873787	-4.89032	0.40769	0.396042	0.401866
		1816	6.50422	4.10965	0.308043	0.311091	0.309567	5.94369	3.14719	0.600239	0.607353	0.603796	-0.762425	-9.85572	0.39154	0.419393	0.405466
		1817	0.520974	0.66203	0.386962	0.430702	0.408832	0.566369	-0.099151	0.319944	0.354637	0.33729	0.298263	-18.3884	5.70565	7.66865	6.68715
		1818	-1.59243	-5.96704	0.125496	0.137771	0.131633	-2.28513	-3.32584	0.237426	0.262084	0.249755	-3.02786	-0.732952	1.28943	1.3755	1.33247
		1819	-17.546	-11.9054	2.66808	4.03139	3.34973	3.21293	6.56154	0.465449	0.568684	0.517066	14.5089	7.83271	0.274113	0.31531	0.294711
		1820	-7.33614	-18.0856	1.69509	1.73087	1.71298	-3.63904	7.22991	0.331294	0.356135	0.343714	-10.0914	2.77216	0.614654	0.654999	0.634826
		1821	-9.10171	17.203	3.03034	3.06531	3.04782	2.93856	-5.37935	0.46684	0.480007	0.473424	-6.89652	-4.50249	1.14366	1.32561	1.23464
		1822	1.20245	1.67019	1.68478	1.57755	1.63117	-4.22538	4.03508	0.248064	0.242098	0.245081	-5.14371	0.465691	0.705756	0.612079	0.658917
		1823	-7.23043	13.2705	3.69598	2.63196	3.16397	1.59574	1.17356	0.171472	0.195061	0.183267	6.022	-3.4871	0.333691	0.368443	0.351067
		1824	-0.358413	7.25302	2.3182	2.2191	2.26865	-0.0157777	2.06673	0.285174	0.29119	0.288182	8.83228	-10.3915	0.324185	0.309569	0.316877
		1825	2.40098	-1.54445	0.149901	0.165977	0.157939	-1.99291	1.82772	0.473357	0.553671	0.513514	7.17225	-0.732131	0.522463	0.572037	0.54725
		1826	5.9766	0.356637	0.816703	0.889071	0.852887	3.26589	0.422453	0.370005	0.400312	0.385159	-3.17779	2.9109	0.523205	0.55799	0.540598
		1827	-5.5981	-13.2431	0.214145	0.218245	0.216195	-1.4767	-4.78125	0.0902428	0.0989592	0.094601	-1.11165	2.58128	0.236574	0.213043	0.224809
		1828	-15.1003	3.07888	0.78805	0.735643	0.761846	-2.93435	-1.01424	0.147331	0.129766	0.138549	5.98541	0.165736	0.109799	0.090854	0.100327
		1829	-2.2193	4.09009	2.75572	2.60484	2.68028	-0.0186056	5.96367	0.314968	0.327507	0.321237	-3.73504	-2.18978	0.169043	0.177984	0.173513
		1830	-13.3651	-39.8529	0.150393	0.171908	0.16115	2.82595	-39.441	0.177764	0.145913	0.161839	15.2207	-38.8845	0.141816	0.137228	0.139522
		1831	-8.07177	-6.48656	0.617924	0.581034	0.599479	0.00562885	-0.763287	0.225453	0.230931	0.228192	1.38223	1.32451	0.150158	0.153763	0.15196
		1832	-1.27437	8.2481	0.281985	0.253632	0.267808	-4.41003	-5.94936	0.219964	0.205107	0.212536	1.45748	-9.60269	0.180322	0.176399	0.178361
		1833	-3.71763	1.01092	1.17366	1.1932	1.18343	-5.60235	5.72512	0.233798	0.242911	0.238355	9.93976	-12.3718	0.16138	0.137783	0.149582
		1834	6.01944	-13.5777	3.79669	4.097	3.94684	-6.39796	8.01299	0.563734	0.552062	0.557898	-8.51491	9.01868	0.211061	0.227797	0.219429
		1835	-2.02824	-1.97214	0.459858	0.490324	0.475091	-1.18284	1.37767	0.393402	0.394725	0.394063	2.58859	-1.77642	0.304651	0.337846	0.321248
		1836	7.56477	-2.68372	0.250116	0.279776	0.264946	5.32889	7.94827	0.201662	0.189961	0.195812	2.44273	6.2657	0.434825	0.454208	0.444517
		1837	0.618753	1.10357	0.0613067	0.0627934	0.0620501	-6.38809	-6.73363	0.54362	0.574579	0.559099	-4.31774	-7.64118	2.41134	2.62671	2.51902
		1838	2.83619	-4.74764	0.267391	0.272877	0.270134	2.82546	-12.6681	0.268633	0.274666	0.27165	4.07236	-2.97383	0.33322	0.315424	0.324322
		1839	6.33421	-7.15417	0.388218	0.395324	0.391771	-3.47479	-2.70239	0.297329	0.314409	0.305869	5.19393	-6.87615	1.54992	1.61728	1.5836
		1840	4.47175	0.222533	0.692149	0.680826	0.686487	-5.86549	-1.40179	0.132831	0.125169	0.129	-15.3057	-7.58178	0.257425	0.233711	0.245568
		1841	-4.20013	-5.18283	0.1083	0.110463	0.109382	-2.19135	-0.535206	0.205425	0.242735	0.22408	7.0101	8.58019	0.442316	0.558542	0.500429
		1842	-7.46924	-9.64599	0.111677	0.111299	0.111488	-3.91144	-4.37796	0.150527	0.161315	0.155921	17.2685	18.2758	0.75863	0.849617	0.804124
		1843	-27.4563	-27.1677	1.07392	1.27253	1.17323	-28.177	-14.1338	0.311481	0.271946	0.291713	-30.9281	-8.4606	0.617056	0.491607	0.554331
		1844	12.4949	5.69933	1.62548	1.50578	1.56563	-14.0761	-14.2847	2.19727	1.54426	1.87077	-7.46259	-16.5944	3.78054	2.03556	2.90805
		1845	-30.169	0.0162461	4.21214	3.31084	3.76149	-20.6023	-0.304184	1.09975	0.935088	1.01742	-0.722041	2.64727	0.112181	0.108488	0.110334
		1846	14.0462	12.7703	2.42434	2.18322	2.30378	-5.83125	-17.9287	0.582993	0.618663	0.600828	-8.97352	-12.4348	0.237181	0.254596	0.245889
		1847	-7.24648	-7.89896	1.40475	1.437	1.42087	3.92422	2.82085	0.683742	0.695596	0.689669	-5.88105	-1.9481	0.522391	0.522962	0.522677
		1848	5.98422	-3.30446	0.29716	0.274062	0.285611	5.48213	-3.62174	0.377447	0.350088	0.363768	4.03611	-1.88011	0.449092	0.447495	0.448293
		1849	-9.74764	15.8834	1.41639	1.3316	1.374	2.55027	1.17352	0.336642	0.328052	0.332347	-10.1381	-9.07072	0.440393	0.483845	0.462119
		1850	-4.89706	-1.59263	0.841277	0.793524	0.8174	0.00404412	0.140512	0.19717	0.202818	0.199994	0.39719	0.166276	0.129505	0.132038	0.130772
		1851	-1.5606	-2.98362	0.593808	0.634418	0.614113	4.37203	-5.59498	0.527123	0.432725	0.479924	-5.31434	-8.6057	0.149908	0.150633	0.15027
		1852	-17.8069	-12.9871	1.21392	1.08186	1.14789	-3.3983	1.27021	0.605072	0.588878	0.596975	3.94352	1.72898	1.0134	0.973784	0.993592
		1853	4.57491	8.10726	0.374135	0.352218	0.363177	-3.50679	-6.4827	0.702869	0.669918	0.686393	-1.01558	-4.1098	0.934455	0.881708	0.908081
		1854	1.34215	-10.1965	0.592084	0.601358	0.596721	8.53797	5.86688	0.30571	0.299224	0.302467	8.87387	7.18541	0.279949	0.264594	0.272271
		1855	-1.78745	-0.686203	0.289335	0.29061	0.289973	11.5192	-0.336107	1.48517	1.36729	1.42623	16.9878	6.4443	1.45453	1.48579	1.47016
		1856	-14.668	-7.88158	0.613672	0.579348	0.59651	-4.55585	-0.179092	0.637142	0.630152	0.633647	4.42099	2.10602	0.326171	0.266947	0.296559
		1857	-1.85693	4.1823	0.244765	0.277041	0.260903	-0.0299975	-0.974027	0.138574	0.146145	0.14236	-0.0624264	-0.450499	0.282361	0.300021	0.291191
		1858	1.21791	-0.206652	0.65542	0.606144	0.630782	0.215041	-0.389186	0.242558	0.229007	0.235782	-0.21524	0.35359	0.351348	0.333333	0.342341
		1859	2.84048	2.271	0.252542	0.233387	0.242964	-1.85108	-17.5783	1.10447	0.968332	1.0364	6.7402	3.3865	0.976942	1.00686	0.991901
		1860	6.7832	-2.52492	0.747407	0.763496	0.755452	-8.12384	-1.94606	0.49516	0.505712	0.500436	22.1299	6.96476	0.316648	0.259332	0.28799
		1861	0.112753	-2.46107	0.250743	0.245141	0.247942	2.7938	-1.44609	0.72179	0.625552	0.673671	-0.274699	-3.10862	1.51479	1.1302	1.32249
		1862	-1.69259	-1.74341	0.162383	0.159946	0.161164	2.31602	2.50194	1.60712	1.1478	1.37746	-6.84132	-9.92573	1.27953	0.798584	1.03906
		1863	19.8288	3.62445	0.981996	0.98191	0.981953	11.7264	2.11756	12.9056	16.6513	14.7784	-5.32475	-8.42538	6.35026	5.38751	5.86889
		1864	-0.152247	2.0358	1.63047	1.96048	1.79547	0.294654	0.326654	0.18999	0.186749	0.18837	0.177764	-0.182174	0.463799	0.448858	0.456328
		1865	13.4953	-42.0569	0.322918	0.299056	0.310987	12.6628	-42.2888	1.16891	1.27405	1.22148	-26.2876	138.68	3.86922	5.32466	4.59694
		1866	-59.712	43.3965	0.163921	0.143281	0.153601	-46.3151	30.989	0.339565	0.27429	0.306927	127.345	-96.1033	0.395409	0.309899	0.352654
		1867	30.588	-3.31377	3.34722	3.48941	3.41831	25.1638	13.7636	3.14907	1.58729	2.36818	43.7854	17.5075	6.49776	2.61128	4.55452
		1868	1.78707	-7.34696	0.13753	0.164239	0.150884	-2.79851	-8.76419	0.673824	0.702453	0.688139	-12.8584	-4.59952	1.3841	1.42732	1.40571
		1869	13.8248	20.6225	0.508232	0.525311	0.516771	-35.9404	-33.1475	7.10155	8.86426	7.9829	10.5749	7.93962	1.59612	1.79287	1.6945
		1870	4.27378	-7.43076	1.50182	1.4727	1.48726	5.23701	-18.9299	1.84466	2.57083	2.20775	-1.04728	39.0331	0.723925	0.959768	0.841847
		1871	0.983508	-0.82005	0.166639	0.181968	0.174304	-2.80708	-2.13303	0.711096	0.697735	0.704416	-1.24778	-8.08158	0.993862	1.00976	1.00181
		1872	0.459754	0.0401293	0.167752	0.165276	0.166514	1.94147	-2.86546	0.595952	0.622288	0.60912	-0.0143372	-4.32447	0.475777	0.46969	0.472734
		1873	4.95065	-2.66291	0.307667	0.282276	0.294971	-5.01471	4.38722	0.785914	0.767242	0.776578	-8.24974	-1.54547	0.433959	0.439783	0.436871
		1874	3.05725	-2.99995	0.634125	0.596878	0.615502	0.387119	0.277905	0.173284	0.189602	0.181443	-0.480184	-0.0743159	0.124344	0.133471	0.128907
		1875	3.785	-8.04808	0.151719	0.142647	0.147183	0.0280753	6.81767	0.339227	0.331194	0.335211	8.89741	-1.63703	1.0199	0.806589	0.913244
		1876	11.4676	18.0073	0.704043	0.730264	0.717154	8.84066	1.39843	0.381974	0.365291	0.373633	-15.0531	-2.73084	0.460395	0.372665	0.41653
		1877	1.3937	21.9853	0.42605	0.524292	0.475171	-1.4956	2.89111	0.205647	0.253229	0.229438	20.1643	15.3409	0.620997	0.777255	0.699126
		1878	0.293258	1.58546	0.28147	0.277382	0.279426	0.504852	0.971369	1.76361	1.77079	1.7672	5.02687	-3.11874	0.724094	0.741426	0.73276
		1879	23.3022	-27.0768	0.768476	1.19653	0.982501	12.9179	-14.3531	1.05291	2.72343	1.88817	15.3224	-18.0495	1.73378	3.94925	2.84152
		1880	1.51561	0.604212	4.12977	3.19933	3.66455	0.486491	1.57513	0.296448	0.281467	0.288958	-0.346701	-0.2736	0.203938	0.193089	0.198514
		1881	-0.748582	-0.807652	3.05791	2.57489	2.8164	0.39062	0.155091	0.10524	0.0945019	0.0998712	-0.504127	-0.165677	0.120808	0.110735	0.115771
		1882	13.4751	47.3461	3.22128	2.99071	3.10599	0.368475	14.0732	3.96502	3.25373	3.60938	-0.723798	-4.44237	0.183778	0.18609	0.184934
		1883	1.09247	-59.2592	1.38231	5.00405	3.19318	-1.11052	-45.4459	0.238539	0.47809	0.358315	-12.4729	-41.4913	0.429586	0.977538	0.703562
		1884	-4.87144	9.06445	0.551623	0.584558	0.56809	2.17703	-1.81997	1.24504	1.29434	1.26969	4.4175	-7.61161	0.345469	0.384951	0.36521
		1885	-18.3322	11.8167	0.359184	0.341931	0.350558	9.52638	-9.15019	0.539348	0.52931	0.534329	6.74656	3.64422	0.300652	0.310212	0.305432
		1886	8.8253	1.80144	3.72183	3.62814	3.67499	-3.85108	0.825034	0.230139	0.228788	0.229463	0.632493	0.658714	0.1797	0.169808	0.174754
		1887	-0.903011	4.60911	4.31596	2.7227	3.51933	0.131436	0.0754176	0.100893	0.101903	0.101398	-0.272467	-0.875081	0.0907644	0.0931719	0.0919682
		1888	-1.13544	-7.19781	0.292389	0.251009	0.271699	-6.77932	-8.34104	0.189612	0.176763	0.183188	15.639	10.796	0.362862	0.311542	0.337202
		1889	-9.82867	-5.30618	0.594641	0.572769	0.583705	0.885786	2.24451	2.20361	2.20772	2.20566	10.0695	3.92226	0.275812	0.281482	0.278647
		1890	-20.3865	-23.6937	0.515366	0.629515	0.572441	7.85946	13.0794	0.377625	0.486232	0.431928	-62.9105	-89.2217	0.556811	0.737604	0.647207
		1891	8.36853	-2.54327	0.661658	0.685563	0.67361	0.992973	-3.05837	0.37626	0.374759	0.37551	-1.20879	3.6846	1.04423	0.968436	1.00633
		1892	-1.7311	-1.75602	0.371842	0.357415	0.364628	0.189246	0.490403	0.267579	0.262897	0.265238	1.44536	0.990783	0.34289	0.334102	0.338496
		1893	7.43076	-0.796745	2.04126	1.92242	1.98184	-0.868908	1.32449	0.307239	0.226551	0.266895	-3.02078	1.69052	0.0781988	0.0641644	0.0711816
		1894	11.4447	3.20183	3.42826	2.54054	2.9844	0.496598	-0.410248	0.354334	0.288459	0.321397	-17.6791	-0.37399	0.912935	0.959822	0.936378
		1895	20.3912	-0.241463	0.817457	0.750691	0.784074	16.497	-7.4814	0.288762	0.281717	0.285239	15.3208	-11.0312	0.505497	0.527956	0.516726
		1896	-14.2261	-25.5762	0.41447	0.432895	0.423683	-1.97022	-15.8383	17.0135	19.4531	18.2333	275.156	282.338	11.184	11.3417	11.2628
		1897	1.19072	3.99518	0.188718	0.171292	0.180005	1.43073	0.237918	0.45123	0.42309	0.43716	-9.68524	1.62196	0.258198	0.295585	0.276892
		1898	-0.462297	-8.76847	0.157961	0.185166	0.171563	5.0334	-8.65887	0.492576	0.614871	0.553724	6.19466	-10.9899	0.282157	0.469374	0.375765
		1899	5.55373	-2.70592	0.65432	0.59549	0.624905	4.33628	-3.51404	0.434398	0.392967	0.413683	3.08337	0.327764	0.702435	0.653406	0.67792
		1900	-0.0878062	0.488021	0.0516333	0.0599778	0.0558055	-0.900415	-9.10998	0.382353	0.684284	0.533319	0.357837	-35.3494	0.839122	1.9334	1.38626
		1901	-3.96018	-1.08627	0.342418	0.322524	0.332471	5.73131	-1.12145	1.61053	1.52718	1.56886	21.59	1.10038	0.956718	1.00561	0.981165
		1902	2.78333	12.1974	0.598516	0.622516	0.610516	-0.813392	5.43641	0.178698	0.213299	0.195999	-7.84713	-3.37858	0.35838	0.423268	0.390824
		1903	-0.519643	6.29491	0.304269	0.307119	0.305694	3.12469	-0.802277	0.325305	0.338969	0.332137	-3.50776	-0.803892	0.301746	0.298913	0.30033
		1904	-3.69097	7.73209	0.354316	0.364563	0.35944	-5.07557	-1.44996	2.02992	1.9443	1.98711	-4.40135	-6.61367	0.536062	0.546184	0.541123
		1905	0.467403	4.76543	0.42807	0.444805	0.436437	-1.25281	-1.83425	0.470785	0.498877	0.484831	4.53687	-2.42339	0.53252	0.528495	0.530507
		1906	-8.28479	-16.1552	2.68455	3.07297	2.87876	3.61525	-1.58466	0.602394	0.638704	0.620549	3.81941	-1.8702	0.116484	0.119018	0.117751
		1907	-1.01261	0.332585	0.121025	0.120216	0.120621	2.24083	4.596	0.194353	0.18973	0.192042	7.31131	8.73705	0.57629	0.56743	0.57186
		1908	0.763401	0.77139	2.06239	1.87104	1.96672	-0.0342752	-0.743562	0.308228	0.342855	0.325542	-1.36968	-2.04875	0.274146	0.291674	0.28291
		1909	1.89407	-1.27832	0.137565	0.131329	0.134447	0.48928	-2.61327	1.5925	1.56106	1.57678	4.56138	0.733439	0.441989	0.423164	0.432577
		1910	-2.07385	1.67533	1.1549	1.12469	1.1398	-0.374285	0.0491026	0.316293	0.328045	0.322169	0.379259	-0.768195	0.172657	0.178324	0.17549
		1911	2.00155	5.41148	0.455986	0.419943	0.437964	-0.773658	-3.00855	0.24533	0.195568	0.220449	-6.27098	13.7548	0.482565	0.439432	0.460999
		1912	5.66394	0.740207	2.16782	2.3324	2.25011	-0.076534	-2.2436	0.829242	0.901038	0.86514	-0.00779819	-1.46558	4.24689	3.70662	3.97676
		1913	2.24625	-2.3252	1.0306	0.911838	0.97122	-0.700907	-0.204363	0.0697523	0.0689591	0.0693557	0.774622	0.41995	0.0545087	0.0529982	0.0537535
		1914	3.38179	-108.065	0.246049	1.27886	0.762453	-1.81783	-119.308	0.268061	0.780508	0.524285	2.58032	-120.436	0.291973	0.504918	0.398446
		1915	17.1713	-28.0932	0.236524	0.209869	0.223197	-40.5503	31.743	1.32219	0.969168	1.14568	15.8433	-24.4273	0.922598	0.621974	0.772286
		1916	16.8178	9.8992	0.360771	0.323287	0.342029	3.28143	-6.32226	0.875687	0.762419	0.819053	-12.3478	-1.13892	0.207435	0.182823	0.195129
		1917	-7.70218	-0.820549	0.881987	0.968013	0.925	-2.21148	0.151598	0.298298	0.33185	0.315074	2.47124	0.138761	0.252407	0.278923	0.265665
		1918	-5.47161	-6.50726	0.175556	0.182649	0.179102	4.06358	1.09418	0.386527	0.391991	0.389259	1.43449	4.79581	0.349358	0.373859	0.361608
		1919	-0.3965	-1.09259	0.074696	0.082836	0.078766	0.978746	1.18589	0.121913	0.126981	0.124447	0.813732	5.60026	0.530671	0.521118	0.525895
		1920	-7.03046	-0.568066	0.688425	0.76368	0.726052	0.0320615	0.347798	0.445283	0.447898	0.44659	-0.818413	-3.39356	0.474303	0.497345	0.485824
		1921	2.50195	-1.62489	0.363905	0.381055	0.37248	0.2592	-0.371032	0.228711	0.238793	0.233752	-1.05127	1.89826	0.211514	0.209128	0.210321
		1922	6.17999	29.4286	1.50908	1.49152	1.5003	13.934	20.4681	1.45489	1.4298	1.44234	-15.0181	6.71509	0.283438	0.299645	0.291541
		1923	-0.537452	0.227931	0.395123	0.391988	0.393556	9.72665	0.164907	0.233554	0.214963	0.224259	-8.36034	-4.37385	0.426914	0.392206	0.40956
		1924	-2.57069	1.68668	0.83928	0.936116	0.887698	0.246198	-4.49622	0.693685	0.798816	0.746251	3.76225	4.4902	1.05763	1.07266	1.06514
		1925	1.52407	-0.453724	0.104477	0.110557	0.107517	0.13429	0.234984	0.0938102	0.100702	0.0972559	-2.48123	-0.191297	0.180687	0.18738	0.184034
		1926	2.97858	8.65446	0.352426	0.333675	0.34305	-3.83305	7.03421	0.330374	0.343714	0.337044	-6.4796	4.99728	0.211244	0.230151	0.220697
		1927	-37.5738	2.29487	1.46995	1.34862	1.40929	-39.4959	-6.55412	1.19255	0.820851	1.0067	44.8125	-6.20572	0.131208	0.141897	0.136553
		1928	1.57797	-0.487163	0.254305	0.268667	0.261486	0.354431	0.282351	0.110243	0.115204	0.112724	0.769623	-0.578956	0.287087	0.303021	0.295054
		1929	-1.01622	-9.66259	1.11645	1.09415	1.1053	0.157761	-0.334342	0.158536	0.159933	0.159234	-0.973448	-10.2001	0.990159	1.00335	0.996752
		1930	-4.9954	2.96366	0.641074	0.656923	0.648998	1.33266	8.77855	0.285833	0.283833	0.284833	1.57476	-2.26367	0.134577	0.125001	0.129789
		1931	-27.2481	-14.0766	1.46773	1.50145	1.48459	-7.11047	-17.1056	3.42209	3.47389	3.44799	2.32244	-9.57066	0.301784	0.341955	0.321869
		1932	1.39227	-1.15811	0.799679	0.869514	0.834597	-0.0385685	-0.142507	0.885908	0.939165	0.912536	-2.11752	-1.65293	2.27151	2.59785	2.43468
		1933	3.29162	-11.8044	3.86861	3.283	3.5758	-3.15733	1.49707	0.38816	0.363471	0.375815	1.20913	-0.332397	0.342907	0.33112	0.337013
		1934	-10.5022	6.70492	6.00027	5.5151	5.75768	-2.68323	9.94762	5.10241	4.89679	4.9996	0.323651	0.732742	0.125923	0.126787	0.126355
		1935	-5.41948	5.94129	1.33821	1.38231	1.36026	-2.97213	3.79784	3.22569	3.96753	3.59661	-8.68647	-1.74714	0.422071	0.460875	0.441473
		1936	0.188503	-0.716091	0.110264	0.115306	0.112785	-0.688561	3.62054	1.00077	1.09308	1.04693	-6.59226	8.35769	1.94253	2.23844	2.09049
		1937	-1.21058	-1.00015	0.278885	0.265481	0.272183	3.24047	-0.00125254	0.159192	0.156722	0.157957	-13.6994	-1.15406	0.399297	0.400267	0.399782
		1938	0.0636477	-10.066	0.659038	0.675845	0.667441	10.282	-9.12758	0.309527	0.363794	0.33666	-75.1309	107.625	1.02023	1.3192	1.16972
		1939	-16.917	8.85042	0.636955	0.67237	0.654662	-12.1965	1.53235	4.68348	5.54541	5.11444	-14.1546	0.891596	1.13464	1.09194	1.11329
		1940	-0.573297	5.66743	1.25214	1.25392	1.25303	-1.35817	2.77587	0.766359	0.806823	0.786591	0.927932	-4.42527	1.06238	1.06934	1.06586
		1941	0.795621	-5.04358	1.27965	1.14762	1.21363	-2.94549	-3.59533	3.58527	4.41733	4.0013	11.7157	7.96511	0.995792	1.18274	1.08927
		1942	0.944598	1.58393	0.174871	0.176117	0.175494	-0.229471	-3.06794	1.25831	1.45838	1.35835	-5.35516	-26.6551	2.32336	1.99707	2.16022
		1943	-5.86476	-1.98845	0.388331	0.412597	0.400464	9.40526	5.07888	0.57842	0.56126	0.56984	8.03069	3.41751	0.639512	0.601637	0.620574
		1944	4.92696	-6.05772	0.224972	0.224072	0.224522	0.598089	-2.16371	0.66024	0.642298	0.651269	4.12681	6.40425	0.320609	0.283067	0.301838
		1945	1.47127	1.9563	0.72676	0.853535	0.790147	-0.0577191	0.649386	0.0993466	0.100122	0.0997345	-0.604762	-3.31081	0.169214	0.170798	0.170006
		1946	1.18781	-3.09176	0.416304	0.405238	0.410771	0.87225	-5.51464	0.531206	0.521482	0.526344	-3.41508	2.61425	0.178614	0.187994	0.183304
		1947	46.5566	-17.8497	0.942725	0.738118	0.840421	29.3794	-10.4492	0.29496	0.189609	0.242285	27.3748	-10.1764	0.402531	0.232964	0.317747
		1948	5.24853	1.50003	2.65637	2.84109	2.74873	-0.649878	-0.451294	0.275973	0.284604	0.280288	-1.44522	0.638926	0.534939	0.507561	0.52125
		1949	1.66431	-3.54267	0.437196	0.391131	0.414163	-2.1717	1.29166	0.485203	0.509987	0.497595	-2.92215	3.76959	0.259169	0.251441	0.255305
		1950	-1.18943	-0.500926	0.243928	0.243238	0.243583	4.09379	1.36244	0.565406	0.532892	0.549149	3.96441	0.744819	0.539428	0.534979	0.537204
		1951	3.82812	-0.884476	0.992015	0.986652	0.989334	-0.122435	-0.614329	0.195791	0.190382	0.193086	-0.20964	1.06736	0.190003	0.181215	0.185609
		1952	-14.4176	18.082	0.65924	0.546542	0.602891	-14.26	18.8421	0.272641	0.196898	0.234769	-14.8479	18.9251	0.138415	0.147412	0.142913
		1953	-26.5452	9.09759	0.526926	0.461697	0.494312	-10.2625	-0.0417749	0.651646	0.396338	0.523992	329.815	-76.2456	9.10909	2.91946	6.01428
		1954	21.6216	-45.6576	0.299051	0.342845	0.320948	0.448411	38.5744	1.17611	3.21694	2.19652	-59.0993	297.091	4.83027	3.21967	4.02497
		1955	-10.3223	-4.03436	2.40799	2.79628	2.60214	18.9862	21.3594	0.52919	0.517262	0.523226	-25.1671	232.265	1.63024	0.578018	1.10413
		1956	-1.23015	-4.98452	0.170231	0.174847	0.172539	0.802834	-3.19509	0.253283	0.276307	0.264795	3.52056	4.45146	0.326916	0.35818	0.342548
		1957	-30.3668	43.1421	1.11891	1.18426	1.15159	5.91982	-13.3102	0.414686	0.4951	0.454893	-14.5726	33.6901	0.287154	0.3198	0.303477
		1958	-4.69332	-4.53004	0.194067	0.195989	0.195028	-0.0227492	3.93215	0.599358	0.611929	0.605643	13.6181	24.5119	1.12975	1.21419	1.17197
		1959	-1.22428	3.43564	0.152364	0.158071	0.155217	-0.494842	1.03108	0.0683492	0.0714734	0.0699113	1.13462	0.0960186	0.0893449	0.0920994	0.0907222
		1960	-2.33316	-4.15428	1.64433	1.8959	1.77012	-3.00198	-4.8066	0.767155	0.744798	0.755976	-2.04264	-3.23515	0.131875	0.140769	0.136322
		1961	42.3031	62.1211	0.577532	0.963699	0.770616	33.0813	54.5796	0.798968	1.41445	1.10671	31.0587	79.445	0.757964	1.17115	0.964557
		1962	-1.06885	20.2027	0.271933	0.277536	0.274734	-1.9164	18.8711	0.196961	0.196403	0.196682	0.0293717	18.6002	0.189596	0.1974	0.193498
		1963	-183.174	-75.1489	10.2162	5.02532	7.62078	-17.924	-15.6258	7.363	2.90103	5.13202	35.0563	14.5842	0.183109	0.145159	0.164134
		1964	-6.86893	1.30373	0.204586	0.214415	0.2095	4.21841	-0.389041	0.119955	0.124079	0.122017	-4.63502	-0.331107	0.35101	0.349774	0.350392
		1965	-189.424	-16.2938	1.22002	0.293482	0.756751	29.9878	0.728049	0.895593	0.289909	0.592751	16.8418	-4.25657	0.306894	0.240637	0.273765
		1966	14.8558	-10.6771	0.479394	0.463462	0.471428	12.2697	-9.19193	0.627927	0.627589	0.627758	-65.7329	25.8122	2.38255	2.2437	2.31312
		1967	3.86011	-6.0535	0.626771	0.608512	0.617641	-0.255568	-0.256444	0.143396	0.160322	0.151859	8.74224	2.79499	0.38693	0.386687	0.386809
		1968	-9.46247	-7.8716	0.120468	0.125998	0.123233	-4.45797	-3.08618	0.550179	0.533129	0.541654	-8.89644	-1.76636	0.495737	0.480019	0.487878
		1969	-15.3251	197.646	0.22003	0.291698	0.255864	-19.8208	198.142	0.265951	0.25712	0.261536	-25.0133	196.15	0.353085	0.34385	0.348467
		1970	1.87429	-0.114291	0.217453	0.230553	0.224003	-0.703981	-4.1563	2.94208	3.36169	3.15189	-12.8564	-20.0794	3.1898	2.57429	2.88205
		1971	4.76797	-3.38309	0.190713	0.194549	0.192631	-11.2812	4.51887	0.289331	0.236114	0.262723	-21.9125	8.36306	0.251071	0.204591	0.227831
		1972	-1.62652	-0.685461	0.896498	0.865121	0.880809	2.66624	-2.15518	0.479057	0.512517	0.495787	7.00504	-5.96735	0.503931	0.583536	0.543734
		1973	9.70716	2.11012	3.05204	3.12743	3.08973	-3.06023	-1.59693	0.582552	0.577894	0.580223	-5.82619	-6.41063	1.68921	1.62095	1.65508
		1974	-0.547006	0.264581	0.251697	0.250886	0.251291	-0.113696	-0.427061	0.133319	0.139152	0.136235	0.298596	-0.390119	0.0906105	0.0927472	0.0916789
		1975	27.5079	-16.4668	0.487663	0.350309	0.418986	21.0719	-11.5138	0.803001	0.528701	0.665851	23.488	-18.0945	0.972838	0.670702	0.82177
		1976	2.37457	3.48793	0.324948	0.317134	0.321041	1.30963	4.02173	0.263739	0.264224	0.263982	1.15771	0.0994417	0.275386	0.293742	0.284564
		1977	4.90314	3.67929	2.08556	2.26424	2.1749	0.708082	-0.400112	0.604105	0.637068	0.620586	1.00719	3.9876	3.42579	2.9686	3.1972
		1978	3.07654	1.55952	0.970982	0.932443	0.951712	0.877477	0.462909	0.553595	0.606643	0.580119	0.0773716	-1.29159	0.140594	0.146366	0.14348
		1979	-0.0615969	7.71842	1.41766	1.47966	1.44866	-9.77149	0.296343	1.39878	1.02622	1.2125	5.79961	-11.2574	0.573337	0.639958	0.606647
		1980	2.43366	-5.84288	0.865373	0.878125	0.871749	8.20058	3.8725	3.48	3.5868	3.5334	8.32321	5.81601	0.39931	0.394415	0.396863
		1981	2.78866	0.61118	0.968093	0.927184	0.947638	0.880146	-0.0651044	0.510053	0.551296	0.530674	-0.093522	-1.96341	0.143925	0.148645	0.146285
		1982	-3.44647	-3.95406	0.510922	0.530002	0.520462	-0.814543	-3.58593	0.984594	1.02731	1.00595	4.39786	1.49609	0.340566	0.373633	0.357099
		1983	-4.34154	-12.9408	0.271483	0.314591	0.293037	-1.22794	-2.34844	0.3014	0.387457	0.344428	-7.47759	8.64587	0.259205	0.324383	0.291794
		1984	4.37131	7.02179	0.295105	0.345064	0.320085	2.04279	3.45852	0.259909	0.28149	0.270699	-2.54896	-0.941516	0.172234	0.18149	0.176862
		1985	-24.5109	23.4452	0.63316	0.530906	0.582033	-7.19658	42.8176	0.843637	0.625653	0.734645	-1.66991	40.6595	2.49372	1.61402	2.05387
		1986	-6.54436	-13.5229	0.423478	0.422633	0.423055	0.937576	3.51316	0.4048	0.441977	0.423388	2.30739	4.84635	1.23998	1.39207	1.31602
		1987	-1.07009	1.76739	0.275705	0.293761	0.284733	-7.08637	1.91447	1.11729	1.17697	1.14713	-15.124	2.46425	2.17139	2.03278	2.10209
		1988	8.2923	-2.06035	1.7351	1.89133	1.81321	-2.57561	-0.586881	0.121413	0.127393	0.124403	-2.56148	1.78655	0.164955	0.168945	0.16695
		1989	-1.02453	0.526311	0.65919	0.69949	0.67934	-0.29759	0.0285693	0.352111	0.370939	0.361525	0.758878	-0.196804	0.467998	0.491904	0.479951
		1990	-1.28603	-2.20477	0.943324	0.977917	0.960621	0.24835	0.309825	0.256517	0.262867	0.259692	1.90565	1.35223	0.465559	0.484364	0.474961
		1991	0.041617	-1.83844	0.580585	0.563988	0.572286	-0.132334	0.785689	0.159424	0.16487	0.162147	-0.61793	0.585679	0.159947	0.170735	0.165341
		1992	-1.3341	-3.61865	2.86997	3.07017	2.97007	1.23666	0.382744	0.730365	0.764704	0.747535	0.273241	1.6341	0.26328	0.261377	0.262329
		1993	-17.5643	-78.8971	33.8798	62.6025	48.2412	4.4053	23.9012	0.639864	0.703063	0.671464	6.85967	14.0447	1.02439	1.06094	1.04266
		1994	1.15792	1.10617	1.21945	1.26081	1.24013	0.0400959	-0.440962	0.478249	0.492805	0.485527	-0.743636	0.0809071	0.514266	0.53612	0.525193
		1995	-2.54761	0.252662	0.304792	0.310133	0.307462	0.924638	-1.68567	0.0996883	0.103337	0.101513	-2.46489	3.75952	0.19316	0.200665	0.196912
		1996	16.5949	60.6753	1.50193	3.77044	2.63619	120.069	-22.7993	4.8901	5.33305	5.11158	18.3308	63.4632	0.880887	2.75958	1.82023
		1997	3.67201	-17.8195	5.27191	13.8005	9.53621	-0.634168	-9.07737	0.68056	0.717355	0.698958	-0.117859	-9.77273	0.681176	0.675152	0.678164
		1998	-2.99655	-2.68329	0.601979	0.630548	0.616263	-4.12232	1.4199	2.31972	2.3712	2.34546	-0.524459	2.49709	0.251571	0.242879	0.247225
		1999	2.616	-2.03971	0.560437	0.559298	0.559868	1.34913	-2.70783	0.348712	0.348863	0.348787	2.24292	-0.335156	5.89102	5.17916	5.53509
[truncated: 4,260 more rows]
