# Supplementary material for: Deciphering a hexameric protein complex with Angstrom optical resolution
Source: eLife journal article supplement (doi:10.7554/elife.76308), 2022-05-13
Supplement: fig3-figsupp2-data1 [file Figure 3 -figure supplement 2 -source data 1.xlsx]

## Sheet: Class 1
				Normalized center of mass coordinates of class 1
			Molecule #	X1	Y1	X2	Y2	X3	Y3	dX	dY
			1	-3.16039	-0.972194	0.0209454	-0.662347	3.13944	1.63454	1	1
			2	1.11085	-0.757546	0.951227	-0.615261	-2.06207	1.37281	1	1
			3	-1.64434	0.640409	-1.46227	0.280948	3.10661	-0.921357	1	1
			4	-0.997056	2.44556	-1.02163	0.413987	2.01869	-2.85955	1	1
			5	3.31431	-0.557381	-0.124338	-1.23731	-3.18997	1.79469	1	1
			6	-2.09064	-2.13025	1.04239	1.1183	1.04824	1.01195	1	1
			7	2.48357	0.452786	-3.91616	4.29987	1.43259	-4.75266	1	1
			8	-1.90005	-2.37671	-1.04716	0.63794	2.94721	1.73877	1	1
			9	-4.77415	2.64382	-1.83785	0.53324	6.61199	-3.17706	1	1
			10	-2.45193	0.908366	-1.06135	-1.59844	3.51328	0.690073	1	1
			11	-2.20285	1.81595	1.27741	1.5185	0.925435	-3.33445	1	1
			12	-1.83098	-2.02439	-0.271921	0.977588	2.1029	1.0468	1	1
			13	-1.65964	-1.81727	-0.984825	1.35305	2.64447	0.464218	1	1
			14	2.00089	1.9933	-1.83349	-0.235424	-0.167406	-1.75788	1	1
			15	-0.976747	2.35591	0.452539	-1.213	0.524208	-1.14291	1	1
			16	3.60757	0.0211598	2.05174	-0.000273593	-5.65932	-0.0208862	1	1
			17	1.28683	-2.21121	0.79299	0.602652	-2.07982	1.60856	1	1
			18	1.62473	-2.35312	0.462902	1.22858	-2.08764	1.12453	1	1
			19	2.69824	1.47404	-2.17975	-0.0290235	-0.518485	-1.44502	1	1
			20	1.13668	-0.228399	-1.16187	-1.79881	0.0251909	2.02721	1	1
			21	-6.38806	-0.946539	3.54701	1.77444	2.84105	-0.827903	1	1
			22	2.00327	0.699661	-0.979993	-2.82279	-1.02328	2.12313	1	1
			23	2.98203	0.674426	0.810424	-0.926168	-3.79246	0.251742	1	1
			24	-0.139336	-2.84605	1.10682	0.818194	-0.967485	2.02786	1	1
			25	-4.26476	2.2737	3.01299	-0.138827	1.25177	-2.13487	1	1
			26	0.390064	2.68814	-2.66662	0.603787	2.27655	-3.29192	1	1
			27	2.2793	4.23982	0.657384	1.88186	-2.93668	-6.12169	1	1
			28	-2.74542	-1.42685	-0.135266	-0.172701	2.88069	1.59956	1	1
			29	5.38848	-1.25495	2.03274	-0.392052	-7.42122	1.647	1	1
			30	-7.39466	-0.495108	0.0419725	-1.47027	7.35269	1.96538	1	1
			31	6.83412	-1.32058	0.143769	-2.681	-6.97789	4.00157	1	1
			32	-0.221005	1.65048	-0.104006	1.1479	0.32501	-2.79838	1	1
			33	3.28658	-0.127586	-0.171852	0.527138	-3.11473	-0.399552	1	1
			34	-0.0199586	-0.338751	-1.26767	3.04417	1.28763	-2.70542	1	1
			35	-1.35958	1.55372	-0.910403	-0.7113	2.26998	-0.842417	1	1
			36	2.8575	0.319545	0.0977567	-2.16517	-2.95526	1.84562	1	1
			37	-3.03647	-3.58835	2.86111	0.69626	0.175357	2.89209	1	1
			38	1.32789	-1.26165	2.35408	2.15759	-3.68197	-0.895941	1	1
			39	3.18631	-1.47521	1.58595	2.27416	-4.77226	-0.79895	1	1
			40	-2.18021	1.23512	-5.09643	-3.58552	7.27664	2.3504	1	1
			41	0.158411	-6.06442	1.28296	3.79543	-1.44138	2.26899	1	1
			42	-0.383817	-2.1762	1.18359	0.587163	-0.799773	1.58904	1	1
			43	-4.54562	3.8503	2.38958	-0.718017	2.15605	-3.13228	1	1
			44	0.0456746	2.08927	1.70734	0.35286	-1.75302	-2.44213	1	1
			45	1.3195	-3.23156	-0.953167	0.0426511	-0.36633	3.18891	1	1
			46	1.24278	-5.98452	-1.721	1.56064	0.47822	4.42388	1	1
			47	2.08945	0.131904	-0.165561	2.09436	-1.92389	-2.22626	1	1
			48	5.39861	1.65538	-1.73273	-0.900078	-3.66587	-0.755302	1	1
			49	0.313067	-1.18161	-2.9361	1.46871	2.62303	-0.287097	1	1
			50	-2.29523	0.721442	-0.069051	0.0799206	2.36428	-0.801363	1	1
			51	-3.29475	4.03448	4.1147	-1.15134	-0.819945	-2.88314	1	1
			52	-0.746691	-1.37938	2.36255	-0.75812	-1.61586	2.1375	1	1
			53	3.55316	5.77608	0.8249	-2.41306	-4.37806	-3.36303	1	1
			54	-1.46228	-0.912648	-1.21429	-0.447663	2.67657	1.36031	1	1
			55	1.61471	2.94602	0.33515	-0.410201	-1.94986	-2.53582	1	1
			56	-2.0493	2.23112	0.594123	1.62058	1.45518	-3.8517	1	1
			57	-1.34643	-2.66658	0.459725	-0.416232	0.886709	3.08282	1	1
			58	4.79217	-0.13304	-2.33898	0.080521	-2.45319	0.0525186	1	1
			59	-1.78866	7.58224	1.10988	-0.243595	0.678784	-7.33864	1	1
			60	0.0210932	-2.83966	1.66328	0.979183	-1.68438	1.86047	1	1
			61	0.721246	2.73641	-0.237429	-0.00418368	-0.483817	-2.73223	1	1
			62	-5.52283	0.319177	3.31004	-0.00147727	2.21279	-0.3177	1	1
			63	2.67494	2.93336	0.991836	-2.47379	-3.66678	-0.459571	1	1
			64	-0.0877131	4.86969	-1.30527	-3.08502	1.39299	-1.78467	1	1
			65	-5.86796	2.92959	-0.45546	-2.86995	6.32342	-0.059643	1	1
			66	-2.82353	0.381248	-4.16666	0.757591	6.99019	-1.13884	1	1
			67	-3.09924	0.713584	-0.982749	-1.81788	4.08199	1.10429	1	1
			68	-2.41041	-1.90259	1.23458	-1.12466	1.17583	3.02725	1	1
			69	1.20077	1.84128	4.25979	1.84193	-5.46056	-3.6832	1	1
			70	-3.98535	0.626873	1.34112	1.67495	2.64422	-2.30182	1	1
			71	-4.61649	-0.743356	1.90887	2.3689	2.70762	-1.62554	1	1
			72	-3.06607	-6.27999	-0.583359	-0.371916	3.64943	6.6519	1	1
			73	-3.34247	2.75719	0.0862917	3.02675	3.25618	-5.78395	1	1
			74	1.4404	2.17968	1.26895	1.67072	-2.70935	-3.85041	1	1
			75	-1.16113	-2.11507	-0.635519	0.435998	1.79664	1.67907	1	1
			76	-1.22375	6.62788	0.039316	-2.45691	1.18443	-4.17097	1	1
			77	6.01926	-0.0408108	-1.22143	-1.80808	-4.79782	1.84889	1	1
			78	2.63889	5.56168	-0.706985	1.47185	-1.9319	-7.03353	1	1
			79	2.32234	0.617291	-2.86052	3.00248	0.538177	-3.61977	1	1
			80	4.65875	4.31169	1.61954	0.0685866	-6.27829	-4.38027	1	1
			81	-2.54056	0.241433	0.610899	1.38334	1.92966	-1.62477	1	1
			82	1.95338	1.7321	0.368008	-0.34188	-2.32139	-1.39022	1	1
			83	-2.69318	1.07081	2.56713	-2.59102	0.126049	1.52021	1	1
			84	-2.7233	-0.383065	0.292289	-0.751293	2.43101	1.13436	1	1
			85	-6.69536	-4.04145	4.10453	5.07454	2.59084	-1.03309	1	1
			86	1.33544	0.872479	-2.26446	0.716957	0.929021	-1.58944	1	1
			87	0.898601	1.97761	0.544183	-1.75656	-1.44278	-0.221056	1	1
			88	-3.10709	1.80353	0.296207	0.553826	2.81088	-2.35735	1	1
			89	2.53947	1.8938	-0.889859	-1.11439	-1.64961	-0.779418	1	1
			90	2.1197	-7.10249	-1.39394	0.47244	-0.725761	6.63005	1	1
			91	-2.43898	2.12484	2.25885	2.03251	0.180128	-4.15736	1	1
			92	-0.993699	3.3521	1.20951	0.892113	-0.215814	-4.24422	1	1
			93	-0.054449	3.13967	-0.293528	0.221113	0.347977	-3.36078	1	1
			94	-2.68271	0.14249	-0.272278	-0.746694	2.95498	0.604204	1	1
			95	0.51599	-1.62609	0.372816	-1.09585	-0.888806	2.72194	1	1
			96	6.79014	1.47621	0.277216	0.102792	-7.06736	-1.57901	1	1
			97	-2.02486	-5.80497	-0.74091	-1.10726	2.76577	6.91223	1	1
			98	-5.8438	-4.51145	2.2336	1.21182	3.6102	3.29962	1	1
			99	-1.82074	-1.18184	-0.975342	2.16796	2.79608	-0.98612	1	1
			100	-0.40848	2.04889	-0.419208	-5.87158	0.827689	3.82269	1	1
			101	-0.726293	2.74448	5.20633	0.13312	-4.48004	-2.8776	1	1
			102	-4.05089	0.703952	1.44481	0.813558	2.60607	-1.51751	1	1
			103	-0.783084	4.59617	-2.5033	-2.00351	3.28638	-2.59265	1	1
			104	-4.42486	0.636545	2.63766	1.55241	1.78719	-2.18895	1	1
			105	1.70968	-5.45199	-2.6192	-1.55799	0.909521	7.00998	1	1
			106	1.63949	-1.09438	1.32392	-3.51726	-2.96341	4.61163	1	1
			107	-4.44042	1.1092	6.64693	-0.583567	-2.20651	-0.525633	1	1
			108	-1.85684	-3.63022	3.14765	1.1552	-1.29081	2.47502	1	1
			109	3.48528	-1.10842	-2.95069	3.84458	-0.534591	-2.73616	1	1
			110	4.9019	3.21971	1.36489	1.7736	-6.2668	-4.99332	1	1
			111	-1.93212	-2.17907	2.74177	-0.144976	-0.809641	2.32405	1	1
			112	-1.92417	-2.17196	2.72405	-0.13622	-0.799883	2.30818	1	1
			113	-2.69494	0.424744	2.89579	-0.868069	-0.200845	0.443325	1	1
			114	-5.59351	4.16584	2.05183	-0.961683	3.54167	-3.20416	1	1
			115	0.747859	-5.20774	0.138072	-2.1588	-0.885931	7.36654	1	1
			116	3.00915	2.48028	0.130158	-1.9404	-3.13931	-0.539886	1	1
			117	2.10821	-6.60674	0.0123576	-0.685111	-2.12056	7.29185	1	1
			118	-1.2083	0.439705	-0.703676	-2.48979	1.91198	2.05009	1	1
			119	-3.32888	-4.07436	1.57377	1.55474	1.75511	2.51962	1	1
			120	0.866839	2.65252	0.702631	-0.700465	-1.56947	-1.95206	1	1
			121	-1.7558	-1.28015	-0.883382	1.24167	2.63918	0.0384802	1	1
			122	-3.86447	-3.74309	-0.830343	-1.30249	4.69482	5.04558	1	1
			123	-3.67166	-1.98935	0.576414	1.31269	3.09524	0.676655	1	1
			124	-3.29338	0.582437	0.212083	0.522057	3.0813	-1.10449	1	1
			125	-1.71826	-2.69779	1.22021	-0.693619	0.498044	3.39141	1	1
			126	1.33045	3.94494	-1.1358	2.54769	-0.194651	-6.49262	1	1
			127	2.38154	-1.23994	0.157373	-0.178214	-2.53892	1.41815	1	1
			128	1.45426	2.13751	-2.68377	0.638927	1.22951	-2.77643	1	1
			129	2.95074	-0.00108509	0.95755	1.1819	-3.90829	-1.18082	1	1
			130	-3.06589	-0.21155	0.829003	0.146069	2.23689	0.0654811	1	1
			131	3.38352	-5.7464	1.96121	0.216178	-5.34473	5.53023	1	1
			132	0.558454	-1.38028	-0.553509	-1.70423	-0.00494518	3.08451	1	1
			133	2.47854	0.692448	-0.420766	0.929623	-2.05777	-1.62207	1	1
			134	2.11458	-5.60691	1.84062	-0.226727	-3.9552	5.83363	1	1
			135	-0.149512	-7.93122	0.287091	-0.120373	-0.137579	8.0516	1	1
			136	1.51491	2.26371	-3.30465	-4.29061	1.78974	2.0269	1	1
			137	3.7994	-1.11088	0.228635	2.48783	-4.02804	-1.37695	1	1
			138	-0.191652	4.92564	-0.264211	1.7013	0.455864	-6.62694	1	1
			139	4.19428	2.70767	2.13181	0.278568	-6.32609	-2.98624	1	1
			140	-3.80497	0.338125	6.34255	0.721745	-2.53758	-1.05987	1	1
			141	2.94535	4.03219	1.1084	1.33061	-4.05375	-5.36279	1	1
			142	1.22461	5.09326	-4.07795	-4.87503	2.85334	-0.21823	1	1
			143	1.14706	-5.8328	1.4449	2.25598	-2.59197	3.57683	1	1
			144	-2.27046	1.57477	0.22463	3.92392	2.04583	-5.49869	1	1
			145	3.00161	2.69428	-1.801	0.291811	-1.20061	-2.9861	1	1
			146	2.61016	0.419822	2.91355	-0.0547364	-5.52371	-0.365086	1	1
			147	3.38847	-3.84521	2.73069	-0.800744	-6.11915	4.64595	1	1
			148	-5.74661	-0.0107775	-1.69471	0.694099	7.44132	-0.683322	1	1
			149	5.60315	-4.44855	1.27889	2.28722	-6.88204	2.16134	1	1
			150	1.88166	0.232312	-4.42446	-3.11887	2.5428	2.88656	1	1
			151	-1.29816	-2.10221	-0.754506	3.20124	2.05267	-1.09903	1	1
			152	2.52396	1.46218	0.0269511	4.02168	-2.55091	-5.48386	1	1
			153	0.744675	5.92816	0.301164	1.27383	-1.04584	-7.20198	1	1
			154	-3.35193	5.02204	-1.31994	1.41714	4.67187	-6.43918	1	1
			155	-4.88711	-5.31132	-0.315894	-1.13889	5.20301	6.45021	1	1
			156	-1.23748	4.73167	2.16606	1.51113	-0.928583	-6.2428	1	1
			157	1.33056	1.82989	1.04479	-0.639384	-2.37535	-1.19051	1	1
			158	-2.92203	-0.48092	-0.252888	0.540379	3.17492	-0.0594595	1	1
			159	1.66293	5.69522	0.223444	1.6388	-1.88638	-7.33402	1	1
			160	-5.6867	1.29914	-1.366	-0.393553	7.05271	-0.905589	1	1
			161	-2.55645	-1.27677	-1.8416	-0.981489	4.39805	2.25826	1	1
			162	0.582847	2.95851	0.491566	-0.206083	-1.07441	-2.75243	1	1
			163	-6.2915	-1.72958	1.65018	1.26101	4.64132	0.468573	1	1
			164	-2.18586	-1.80798	-0.0418025	-0.101141	2.22766	1.90912	1	1
			165	-2.8307	0.288284	0.917369	-0.379858	1.91334	0.0915741	1	1
			166	-1.5862	2.45449	-0.389739	0.120419	1.97594	-2.57491	1	1
			167	3.83835	2.10545	-3.33844	-0.626675	-0.499918	-1.47877	1	1
			168	-2.81726	-1.9175	-0.0352609	0.700295	2.85252	1.2172	1	1
			169	4.52606	-4.33367	-0.114674	1.59942	-4.41139	2.73425	1	1
			170	1.87401	-1.86799	-1.7814	1.98655	-0.0926122	-0.118562	1	1
			171	-6.65178	-0.71575	-1.21457	-0.354526	7.86635	1.07028	1	1
			172	-2.48945	1.82953	1.25147	1.4111	1.23798	-3.24063	1	1
			173	2.23395	0.239627	2.3485	0.704736	-4.58244	-0.944363	1	1
			174	-1.96499	2.67666	0.84413	0.112003	1.12086	-2.78867	1	1
			175	-0.830754	2.65039	-0.149132	-0.154386	0.979886	-2.49601	1	1
			176	1.68299	-6.93381	-1.05092	-0.729617	-0.632065	7.66343	1	1
			177	-2.78261	-0.0195165	1.15378	-1.37518	1.62882	1.39469	1	1
			178	-0.64095	-0.793539	4.88365	5.08286	-4.2427	-4.28932	1	1
			179	-0.745349	2.09925	2.63392	0.421663	-1.88857	-2.52091	1	1
			180	1.27641	-2.16496	2.05246	-2.42129	-3.32887	4.58625	1	1
			181	2.08486	1.45178	-0.447101	0.423434	-1.63776	-1.87522	1	1
			182	1.90859	3.03593	2.00146	-1.48637	-3.91005	-1.54956	1	1
			183	-4.81618	0.59179	-2.03892	1.11935	6.8551	-1.71114	1	1
			184	-5.96659	2.27651	1.4802	-1.1261	4.48639	-1.15041	1	1
			185	1.40692	2.41735	-1.8737	0.594137	0.466786	-3.01149	1	1
			186	0.0221088	0.00502072	-1.5843	2.17259	1.56219	-2.17761	1	1
			187	-2.04669	-0.664246	-0.101039	1.70058	2.14773	-1.03633	1	1
			188	-2.84385	-1.26385	-0.267479	0.406173	3.11132	0.857674	1	1
			189	-0.687528	2.08764	0.0121545	2.71641	0.675374	-4.80405	1	1
			190	1.59393	0.984758	1.08783	-0.0882564	-2.68176	-0.896501	1	1
			191	3.05092	-0.335755	-0.21746	0.101717	-2.83346	0.234038	1	1
			192	1.02581	2.75468	0.133447	-0.22541	-1.15925	-2.52927	1	1
			193	1.36457	1.70898	1.38641	-0.561496	-2.75098	-1.14749	1	1
			194	-1.92551	1.56165	-2.70946	-0.0887853	4.63497	-1.47287	1	1
			195	1.37573	2.01695	-0.764693	0.265951	-0.611036	-2.2829	1	1
			196	0.423459	3.30761	-1.51425	-0.64071	1.09079	-2.6669	1	1
			197	4.39587	-4.90194	0.653176	-0.867735	-5.04904	5.76967	1	1
			198	-2.04603	-0.57908	-1.03772	-0.737692	3.08375	1.31677	1	1
			199	-7.01261	-3.78286	1.36461	0.521496	5.64801	3.26137	1	1
			200	-3.20713	1.1835	-0.355664	-0.697411	3.56279	-0.486092	1	1
			201	-1.86206	-2.41457	-1.21832	1.52813	3.08038	0.886437	1	1
			202	-4.66003	-6.88188	1.22635	0.164332	3.43368	6.71755	1	1
			203	1.76335	0.744319	1.07828	0.927851	-2.84163	-1.67217	1	1
			204	-0.524308	-2.09913	-3.56394	-2.00617	4.08825	4.1053	1	1
			205	-0.578612	-5.53443	-0.540615	-1.28747	1.11923	6.82191	1	1
			206	-1.8733	2.42659	-0.251772	-0.332431	2.12507	-2.09416	1	1
			207	2.00117	-5.28285	1.67829	1.67547	-3.67945	3.60738	1	1
			208	5.0873	-0.235447	1.60979	-1.46279	-6.6971	1.69823	1	1
			209	1.10312	-6.90089	2.2611	0.751569	-3.36423	6.14932	1	1
			210	0.441653	-0.548466	-2.20846	-2.23715	1.76681	2.78561	1	1
			211	-1.37673	-1.83132	-0.852043	1.38362	2.22878	0.447698	1	1
			212	-1.96403	2.7866	1.03047	-1.22434	0.933555	-1.56226	1	1
			213	2.11127	-3.32079	-1.31379	0.63033	-0.797484	2.69046	1	1
			214	1.19733	0.365929	1.964	-0.0505469	-3.16134	-0.315382	1	1
			215	0.298403	2.69967	-2.19607	-2.43768	1.89767	-0.261988	1	1
			216	-5.60901	-4.03624	2.0294	0.130248	3.57961	3.90599	1	1
			217	1.36925	2.6264	0.944118	-1.59717	-2.31337	-1.02923	1	1
			218	1.28377	-0.424536	2.08613	-0.518469	-3.3699	0.943006	1	1
			219	-6.10879	-1.92229	4.72566	1.55573	1.38312	0.366562	1	1
			220	1.28433	2.0276	-0.578999	0.184271	-0.705335	-2.21187	1	1
			221	-6.70319	1.70031	0.8621	-0.665046	5.84109	-1.03527	1	1
			222	-3.11966	-0.805408	-0.15376	0.222203	3.27342	0.583205	1	1
			223	2.04651	0.424025	0.966389	0.287785	-3.0129	-0.711811	1	1
			224	-2.61788	1.17846	2.38771	1.61469	0.230167	-2.79314	1	1
			225	1.10752	-2.88292	-1.00674	-0.551225	-0.100777	3.43414	1	1
			226	-2.10541	0.87386	-0.526615	-1.22195	2.63202	0.348091	1	1
			227	-1.25519	2.67484	-0.76037	-3.52487	2.01556	0.85003	1	1
			228	2.03842	-0.380477	-0.40647	3.42207	-1.63195	-3.04159	1	1
			229	-1.354	-2.50309	-2.61181	0.629149	3.96581	1.87394	1	1
			230	-2.30171	-4.26337	1.54089	2.18995	0.760821	2.07343	1	1
			231	4.16092	-1.35957	2.06468	1.56772	-6.2256	-0.208157	1	1
			232	3.7652	-4.73083	-3.2222	0.525656	-0.542998	4.20518	1	1

## Sheet: Class 2
			Normalized center of mass coordinates of class 2
		Molecule #	X1	Y1	X2	Y2	X3	Y3	dX	dY
		1	-4.2059	0.0685236	-4.73941	0.342889	8.94531	-0.411413	1	1
		2	6.70384	-5.62255	-3.59387	1.62671	-3.10997	3.99584	1	1
		3	3.66709	-0.774669	4.66661	-0.821664	-8.3337	1.59633	1	1
		4	-0.262396	-2.15613	-3.627	-5.45101	3.88939	7.60714	1	1
		5	2.75318	-4.55434	5.0968	1.12235	-7.84998	3.43199	1	1
		6	-1.40713	1.3871	-6.56371	0.611526	7.97084	-1.99862	1	1
		7	-3.86225	-2.80955	-4.22623	-0.703151	8.08848	3.5127	1	1
		8	6.22246	-1.1868	-4.21379	7.9071	-2.00868	-6.7203	1	1
		9	3.06301	-7.50502	-1.67032	3.20768	-1.39268	4.29735	1	1
		10	2.69846	8.55643	-2.26968	-1.65232	-0.42878	-6.90411	1	1
		11	4.46416	0.706632	4.59951	-0.211816	-9.06367	-0.494816	1	1
		12	-7.42505	-4.55698	5.57693	-2.27022	1.84813	6.82721	1	1
		13	6.35003	-5.70296	-1.95854	3.17356	-4.39149	2.5294	1	1
		14	3.15659	1.54917	4.79578	0.505219	-7.95237	-2.05439	1	1
		15	-7.52203	1.14829	4.44969	5.90437	3.07235	-7.05266	1	1
		16	5.80239	6.1043	-3.43418	-0.499877	-2.36821	-5.60442	1	1
		17	-0.649538	5.04286	0.554911	2.99311	0.094627	-8.03597	1	1
		18	-0.933385	9.01662	5.92561	-6.83874	-4.99223	-2.17787	1	1
		19	3.62413	-1.68784	4.46183	1.31825	-8.08597	0.369585	1	1
		20	-3.71012	3.27618	-2.91318	2.70221	6.62329	-5.97839	1	1
		21	7.11431	2.01318	-6.11234	5.00153	-1.00197	-7.01471	1	1
		22	-1.09192	-2.24588	-6.95024	3.24116	8.04216	-0.995286	1	1
		23	5.23898	2.77205	-8.63301	1.12347	3.39403	-3.89552	1	1
		24	-1.78648	5.56214	-4.0376	0.714215	5.82408	-6.27635	1	1
		25	4.83789	6.75286	-1.14175	-1.52365	-3.69614	-5.22921	1	1
		26	2.3983	-0.601121	-5.4405	6.60493	3.0422	-6.00381	1	1
		27	-2.99706	8.18644	3.42557	-4.08113	-0.428517	-4.10531	1	1
		28	-2.15549	-4.6013	-1.93308	-2.22547	4.08857	6.82678	1	1
		29	-6.32684	-4.00081	8.80491	-3.18952	-2.47807	7.19033	1	1
		30	-1.93857	-3.58039	5.73904	6.17837	-3.80047	-2.59798	1	1
		31	1.64715	-4.36335	1.21776	-3.99678	-2.86491	8.36013	1	1
		32	7.61576	-1.56226	-4.35731	-0.612686	-3.25846	2.17494	1	1
		33	-7.84157	-2.41743	2.83569	1.14142	5.00588	1.27601	1	1
		34	-4.17871	-5.55689	6.99199	5.16292	-2.81328	0.393972	1	1
		35	6.41036	-0.443404	1.82478	-1.86063	-8.23514	2.30404	1	1
		36	-0.451827	-7.09226	-4.20875	7.77348	4.66058	-0.681219	1	1
		37	2.00037	7.87111	-3.19925	-3.37115	1.19889	-4.49996	1	1
		38	4.41714	8.04702	-1.5986	-3.94261	-2.81854	-4.10441	1	1
		39	6.4469	5.38722	-1.45804	-1.20768	-4.98886	-4.17954	1	1
		40	1.31376	-5.4192	6.68381	5.445	-7.99756	-0.025806	1	1
		41	3.91077	-8.25455	2.98613	6.51875	-6.8969	1.7358	1	1
		42	-3.00808	-0.385123	-5.49348	0.437608	8.50156	-0.0524844	1	1
		43	-5.7086	-5.84555	3.13193	2.75078	2.57668	3.09478	1	1
		44	-3.36697	7.85626	3.04505	-2.84334	0.321922	-5.01292	1	1
		45	1.59525	-8.4991	-1.24113	5.39846	-0.354117	3.10064	1	1
		46	-4.96965	4.65271	-1.80723	0.108895	6.77688	-4.7616	1	1
		47	4.00043	1.01686	-9.40505	0.216783	5.40462	-1.23364	1	1
		48	0.59238	8.64504	-6.68893	-6.07484	6.09655	-2.5702	1	1
		49	-0.429475	-8.23923	7.87572	6.16404	-7.44624	2.07519	1	1
		50	-6.06739	-2.74515	-2.2071	1.99722	8.27449	0.747937	1	1
		51	7.59772	4.64228	-4.42361	1.25328	-3.17411	-5.89557	1	1
		52	-2.50199	3.97303	7.7508	-4.60015	-5.24881	0.627127	1	1
		53	4.27627	-4.27671	0.851928	-3.01598	-5.1282	7.29269	1	1
		54	1.60668	-5.46508	1.38668	-2.90874	-2.99336	8.37383	1	1
		55	-1.2055	5.3334	3.45937	3.45453	-2.25387	-8.78793	1	1
		56	-4.04312	7.84386	6.31716	-0.334114	-2.27404	-7.50975	1	1
		57	8.5135	-3.14184	-4.04992	-1.12751	-4.46358	4.26935	1	1
		58	-7.51959	-2.87391	3.50757	2.89013	4.01202	-0.0162202	1	1
		59	4.71737	-0.741674	3.97699	-0.260893	-8.69436	1.00257	1	1
		60	-6.20988	5.94909	1.95156	-4.08125	4.25831	-1.86784	1	1
		61	7.13617	-5.27945	-0.494398	5.02743	-6.64177	0.252019	1	1
		62	6.80062	1.28133	1.84928	-0.502406	-8.64991	-0.778923	1	1
		63	4.94461	-0.295856	3.47482	-1.71127	-8.41944	2.00713	1	1
		64	5.65674	-6.31411	-3.43768	3.81333	-2.21906	2.50077	1	1
		65	-5.44344	7.08867	3.10209	-1.01299	2.34135	-6.07568	1	1
		66	-3.50091	-0.150842	-1.18094	7.04842	4.68185	-6.89758	1	1
		67	-3.97361	-1.61359	-3.80226	-0.970704	7.77586	2.5843	1	1
		68	-5.16137	1.73286	8.54439	0.277752	-3.38302	-2.01061	1	1
		69	-6.11439	-2.60304	-0.903037	-2.21953	7.01743	4.82258	1	1
		70	-6.2964	6.45464	-2.15701	-7.72416	8.45341	1.26952	1	1
		71	9.32316	-1.18158	-3.51904	1.03133	-5.80412	0.150244	1	1
		72	-7.54102	-2.2007	3.17008	1.26561	4.37094	0.935099	1	1
		73	3.35265	-4.71003	1.50982	-2.82024	-4.86247	7.53027	1	1
		74	-2.91424	3.04083	-2.63724	2.81143	5.55147	-5.85226	1	1
		75	7.02279	0.619852	1.24464	-1.31408	-8.26743	0.694225	1	1
		76	8.26329	1.67907	-3.60386	-0.619286	-4.65942	-1.05979	1	1
		77	-5.57824	2.70443	-1.60362	1.50458	7.18186	-4.20902	1	1
		78	-3.30232	7.90002	2.21116	-1.40338	1.09116	-6.49664	1	1
		79	-3.82572	2.83244	-4.68338	-2.24796	8.5091	-0.584486	1	1
		80	0.572192	-4.27679	-0.201763	-3.85354	-0.370428	8.13033	1	1
		81	-3.65338	0.874855	-3.88935	3.06323	7.54273	-3.93808	1	1
		82	-4.15991	-0.28741	-4.86763	-1.44304	9.02753	1.73045	1	1
		83	4.31797	5.1107	2.39585	0.188446	-6.71381	-5.29915	1	1
		84	8.08646	-3.41385	-3.74427	1.35542	-4.34219	2.05842	1	1
		85	2.0739	-5.96119	-3.26138	-3.50824	1.18749	9.46943	1	1
		86	-3.74699	4.52702	2.20191	4.84239	1.54509	-9.36941	1	1
		87	3.83104	-7.20285	-1.03926	1.32144	-2.79177	5.88141	1	1
		88	4.82739	-1.29024	3.40718	-2.97408	-8.23457	4.26432	1	1
		89	-3.422	8.52929	1.44695	-3.16621	1.97505	-5.36308	1	1
		90	6.54846	4.25157	-2.22109	-3.51414	-4.32736	-0.737435	1	1
		91	1.97799	8.77125	-0.913096	-4.76083	-1.0649	-4.01043	1	1
		92	-6.33809	-1.85095	-1.5899	0.390992	7.92799	1.45996	1	1
		93	4.25106	3.004	1.69903	3.3997	-5.95009	-6.4037	1	1
		94	-0.47983	9.51651	-1.23982	-4.34131	1.71965	-5.17521	1	1
		95	-8.56106	0.210785	2.19042	-1.07167	6.37064	0.86089	1	1
		96	-4.38364	8.16692	-0.322164	-5.42463	4.70581	-2.74229	1	1
		97	8.31522	-2.67885	-3.89459	0.842996	-4.42063	1.83585	1	1
		98	-1.45108	3.99371	8.18201	-2.19499	-6.73094	-1.79872	1	1
		99	-4.87696	-7.26283	2.39911	2.88378	2.47785	4.37905	1	1
		100	-6.45421	-6.59929	-1.01331	6.26997	7.46752	0.329325	1	1

## Sheet: Class 3
			Normalized center of mass coordinates of class 3
		Molecule #	X1	Y1	X2	Y2	X3	Y3	dX	dY
		1	-1.47259	5.13958	0.179039	-0.797929	1.29355	-4.34165	1	1
		2	4.68404	2.11566	4.99144	2.85134	-9.67548	-4.96701	1	1
		3	-0.797207	0.790738	3.2014	-4.26061	-2.40419	3.46987	1	1
		4	-3.26756	-3.11075	0.623892	-1.50855	2.64367	4.6193	1	1
		5	-5.81314	5.30632	0.0979904	4.04534	5.71515	-9.35166	1	1
		6	1.22184	6.59448	4.06153	-1.69996	-5.28337	-4.89452	1	1
		7	-1.32289	4.71787	-5.71714	-4.9016	7.04003	0.183727	1	1
		8	10.3038	1.38612	-3.88596	-0.318483	-6.41787	-1.06764	1	1
		9	-5.89491	-3.8926	-3.68401	-1.97751	9.57892	5.87012	1	1
		10	1.19188	5.16496	0.984184	5.42086	-2.17607	-10.5858	1	1
		11	-3.93212	-8.83106	1.18849	0.741041	2.74363	8.09002	1	1
		12	-4.50554	-3.6554	10.4411	-2.16565	-5.93561	5.82105	1	1
		13	1.14187	5.68347	-9.16595	-5.01436	8.02408	-0.669104	1	1
		14	4.08883	9.96237	-3.14613	-2.73926	-0.942696	-7.22312	1	1
		15	6.05589	0.0954616	-0.283723	-1.73826	-5.77216	1.6428	1	1
		16	9.889	1.53717	-5.408	1.18501	-4.481	-2.72217	1	1
		17	-0.877937	10.2811	1.2676	-2.41789	-0.389659	-7.86323	1	1
		18	7.15385	-3.8521	-1.08622	-4.60391	-6.06763	8.45601	1	1
		19	1.59362	1.03392	-4.69178	1.33417	3.09817	-2.3681	1	1
		20	5.36875	7.96688	-0.436666	-2.24123	-4.93209	-5.72566	1	1
		21	-4.98339	3.52411	0.935524	0.25274	4.04787	-3.77685	1	1
		22	0.483535	-2.33429	4.57469	-6.71026	-5.05822	9.04455	1	1
		23	-5.56873	-7.94803	1.59388	1.09152	3.97486	6.85651	1	1
		24	6.37427	1.76619	4.11012	0.383926	-10.4844	-2.15011	1	1
		25	1.10932	0.00359235	3.82416	-0.144401	-4.93348	0.140809	1	1
		26	-6.55875	-4.24141	3.39045	4.57915	3.1683	-0.337738	1	1
		27	4.60126	2.87752	4.30673	2.12523	-8.90799	-5.00275	1	1
		28	-6.59031	1.99974	-3.70278	-1.12974	10.2931	-0.869995	1	1
		29	3.2686	-4.754	2.00916	-4.21508	-5.27776	8.96908	1	1
		30	4.08247	-2.73091	0.994412	0.938376	-5.07688	1.79254	1	1
		31	2.5738	4.45732	3.10947	-2.37489	-5.68326	-2.08244	1	1
		32	-3.14573	0.109026	-6.43639	2.81683	9.58212	-2.92586	1	1
		33	9.9299	1.78045	-7.20631	-1.28381	-2.72359	-0.496643	1	1
		34	5.52987	3.0415	-5.37616	-3.23678	-0.15371	0.195279	1	1
		35	1.36864	-5.15029	3.91606	1.49623	-5.28469	3.65406	1	1
		36	7.47225	-6.86199	-0.0804436	4.48865	-7.3918	2.37334	1	1
		37	-0.752012	6.28	0.81509	5.07866	-0.0630783	-11.3587	1	1
		38	0.78781	-4.41397	1.33971	-0.413626	-2.12752	4.8276	1	1
		39	-4.21221	-0.231803	-0.893639	-0.30419	5.10585	0.535993	1	1
		40	-2.4301	-4.13616	-3.20644	2.66153	5.63653	1.47463	1	1
		41	2.42166	3.33577	0.943434	0.332178	-3.3651	-3.66795	1	1
		42	-5.81495	-4.85013	2.258	-5.14018	3.55696	9.99031	1	1
		43	3.75468	4.26759	-0.265562	1.12889	-3.48912	-5.39648	1	1
		44	0.0584173	4.29529	2.24245	-0.0451497	-2.30087	-4.25014	1	1
		45	3.53416	2.11493	0.986136	0.426379	-4.5203	-2.54131	1	1
		46	-3.81517	5.45745	0.403479	4.56689	3.41169	-10.0243	1	1
		47	-0.949515	4.4448	-1.82749	-0.401182	2.777	-4.04362	1	1
		48	-1.13143	6.55744	-0.783989	4.10992	1.91542	-10.6674	1	1
		49	0.699174	-7.5945	-1.27122	-3.0678	0.57205	10.6623	1	1
		50	3.84909	9.85376	-0.85362	-2.98105	-2.99548	-6.87271	1	1
		51	-5.19696	6.24852	0.750585	1.87264	4.44638	-8.12116	1	1
		52	1.41985	-0.322265	-2.65416	-5.28242	1.23431	5.60469	1	1
		53	-10.8493	1.24919	6.32899	-0.889742	4.52033	-0.359445	1	1
		54	-6.27858	7.78602	-0.968388	-5.05278	7.24697	-2.73324	1	1
		55	-8.09931	4.7147	0.313985	-2.73391	7.78533	-1.98079	1	1
		56	-1.10023	-7.78209	0.621239	-1.62853	0.478994	9.41062	1	1
		57	0.134604	10.6828	-3.00106	-3.51471	2.86645	-7.16804	1	1
		58	-4.40634	-6.13688	-2.39756	-1.48926	6.80389	7.62614	1	1
		59	-4.29941	-0.195854	2.02865	5.61904	2.27076	-5.42318	1	1
		60	3.15929	10.6441	1.06586	-4.61737	-4.22515	-6.02669	1	1
		61	9.14391	5.1772	-4.91573	-1.61342	-4.22818	-3.56378	1	1
		62	-2.88541	2.99368	-0.752104	0.356665	3.63751	-3.35035	1	1
		63	-4.83201	4.75535	-0.622042	-3.81682	5.45405	-0.938534	1	1
		64	4.77617	0.913209	0.572323	1.25822	-5.34849	-2.17143	1	1
		65	0.727438	-4.68621	0.235859	-0.872444	-0.963297	5.55866	1	1
		66	-1.24669	4.86718	5.37439	4.71844	-4.1277	-9.58561	1	1
		67	-4.89308	0.251932	-0.874969	-0.0858004	5.76805	-0.166132	1	1
		68	5.54795	9.40248	-2.05645	-4.51349	-3.4915	-4.88899	1	1
		69	-9.16053	-5.17162	2.55913	1.25026	6.6014	3.92136	1	1
		70	-4.73396	-3.4031	4.29865	-0.624873	0.435314	4.02797	1	1
		71	3.53232	1.54489	-2.47237	5.19441	-1.05995	-6.7393	1	1
		72	4.79862	-0.612697	-3.97583	0.925173	-0.822787	-0.312476	1	1
		73	7.29378	8.31721	-2.56639	-2.05315	-4.72739	-6.26406	1	1
		74	4.96751	5.87793	2.02459	1.03561	-6.9921	-6.91354	1	1
		75	2.64867	4.96515	0.197577	0.248108	-2.84625	-5.21326	1	1
		76	0.88798	-0.144546	-4.61594	0.956756	3.72796	-0.812211	1	1
		77	-3.66139	2.22599	5.05828	1.56973	-1.39689	-3.79572	1	1
		78	3.5124	4.88972	3.14169	-2.91696	-6.65409	-1.97276	1	1
		79	0.816221	4.48413	0.173316	-0.374693	-0.989537	-4.10944	1	1
		80	-0.75108	-10.4513	-1.15352	3.03611	1.9046	7.4152	1	1
		81	6.83318	-6.65488	-1.37317	0.419554	-5.46002	6.23532	1	1
		82	-2.99336	-2.55202	-0.547745	-0.701115	3.54111	3.25313	1	1
		83	4.0305	-1.05809	0.328227	0.0882749	-4.35873	0.969816	1	1
		84	0.131266	5.47783	0.100025	-0.0032039	-0.231291	-5.47463	1	1
		85	-3.53575	5.78496	-1.51656	3.44907	5.05231	-9.23404	1	1
		86	2.04013	6.10759	-4.90093	-3.17498	2.86079	-2.93261	1	1
		87	-1.33648	-4.15222	5.43519	-1.11035	-4.09872	5.26257	1	1
		88	2.61529	5.11531	5.55933	1.6516	-8.17461	-6.76692	1	1
		89	5.44395	5.33948	-0.045951	-3.72384	-5.398	-1.61564	1	1
		90	3.41211	6.54917	1.53456	2.67653	-4.94668	-9.2257	1	1
		91	-6.13616	0.474956	-4.40728	1.19959	10.5434	-1.67454	1	1
		92	-0.580862	4.15052	-0.439647	1.20033	1.02051	-5.35085	1	1
		93	3.61916	-4.014	-0.821537	0.654891	-2.79763	3.35911	1	1
		94	-5.11001	9.20531	1.3481	-3.05185	3.76191	-6.15346	1	1
		95	-6.40857	-6.73367	0.0372563	2.07696	6.37132	4.65672	1	1
		96	2.38458	6.55665	0.966015	3.28228	-3.35059	-9.83893	1	1
		97	-4.72459	-0.308579	-1.11864	0.340654	5.84323	-0.0320753	1	1
		98	-4.35238	0.620226	-1.18523	0.313593	5.53761	-0.933819	1	1
		99	-2.86381	4.36554	-4.15903	3.50489	7.02284	-7.87043	1	1
		100	-1.95175	5.4807	-0.849896	0.0274041	2.80164	-5.5081	1	1
		101	-7.67543	-1.68713	-0.965536	-3.12403	8.64096	4.81116	1	1
		102	6.14672	2.1227	-0.445063	-0.184823	-5.70166	-1.93788	1	1
		103	-3.75895	2.04122	3.99092	-2.35368	-0.231968	0.312467	1	1
		104	2.8719	7.21304	0.175465	3.12344	-3.04736	-10.3365	1	1
		105	7.48635	-2.17726	1.1601	-2.10875	-8.64646	4.28601	1	1
		106	1.01778	5.11748	0.0153108	-0.908465	-1.03309	-4.20902	1	1
		107	-4.25932	-6.63349	-0.109733	-2.95284	4.36905	9.58633	1	1
		108	-7.03631	-6.66519	1.3324	1.55058	5.70391	5.11462	1	1
		109	7.1056	-2.30556	2.57507	1.39167	-9.68068	0.913896	1	1
		110	-2.95414	-3.52458	-4.91621	-3.67448	7.87035	7.19905	1	1
		111	10.2504	1.32992	-4.91138	-1.02951	-5.33905	-0.300413	1	1
		112	-3.00786	2.96302	0.461169	-5.9379	2.5467	2.97489	1	1
		113	4.05413	-4.43467	-0.840668	-0.750548	-3.21346	5.18522	1	1
		114	5.49941	-3.28742	3.28573	-3.53941	-8.78514	6.82682	1	1
		115	0.677135	-4.38333	0.491966	-0.909526	-1.1691	5.29286	1	1
		116	5.59565	0.175888	-0.934474	0.265075	-4.66118	-0.440963	1	1
		117	-9.15965	5.5352	4.02172	-2.70584	5.13792	-2.82936	1	1
		118	-1.9082	-4.66328	0.723207	0.781626	1.18499	3.88165	1	1
		119	2.03271	-5.21917	-5.99797	2.9336	3.96526	2.28557	1	1
		120	-2.91093	9.87762	2.07136	-5.06404	0.839572	-4.81358	1	1
		121	-0.378862	4.35534	-1.58239	-0.142769	1.96125	-4.21257	1	1
		122	-1.22881	1.40461	-0.451335	-5.0554	1.68014	3.65079	1	1
		123	1.62588	-4.31579	0.229541	-1.03627	-1.85542	5.35206	1	1
		124	-3.17398	-5.52108	1.04048	-5.0949	2.1335	10.616	1	1
		125	4.37176	3.76312	-0.0644231	0.187894	-4.30733	-3.95102	1	1
		126	-1.35896	4.52109	2.95395	-3.44768	-1.59499	-1.0734	1	1
		127	-3.81106	-5.96351	6.12901	1.08749	-2.31795	4.87602	1	1
		128	-5.87304	1.66431	-0.0830428	-0.911599	5.95609	-0.752711	1	1
		129	-3.94732	-1.45496	0.189102	0.487257	3.75822	0.967698	1	1
		130	-2.15212	4.1646	-0.331249	0.997865	2.48337	-5.16247	1	1
		131	-4.4886	2.47191	3.78496	-2.22327	0.703645	-0.248637	1	1
		132	-3.76455	-4.42048	6.69156	1.18975	-2.92702	3.23074	1	1
		133	2.77793	-4.75571	-1.57609	0.225933	-1.20184	4.52978	1	1
		134	2.74762	3.20007	-0.188841	-0.129871	-2.55878	-3.0702	1	1
		135	-5.6529	-2.0184	-0.156641	-0.408443	5.80955	2.42685	1	1
