# Supplementary material for: Deciphering a hexameric protein complex with Angstrom optical resolution
Source: eLife journal article supplement (doi:10.7554/elife.76308), 2022-05-13
Supplement: fig3-figsupp5-data1 [file Figure 3 -figure supplement 5 -source data 1.xlsx]

## Sheet: Figure 3- supplement 4a-c
	FSC curve calss 1			FSC curve calss 2				FSC curve calss 3
	x(spatial frequency 1/Å)	y (Correlation)		x (spatial frequency 1/Å)	y (Correlation)			x (spatial frequency 1/Å)	y (Correlation)
	0	1		0	1			0	1
	0.00333333	0.999656		0.00333333	0.874554			0.00333333	0.998987
	0.00666667	0.998303		0.00666667	0.836749			0.00666667	0.999015
	0.01	0.995553		0.01	0.873595			0.01	0.998103
	0.0133333	0.994791		0.0133333	0.857762			0.0133333	0.99801
	0.0166667	0.992436		0.0166667	0.843689			0.0166667	0.995753
	0.02	0.990104		0.02	0.846938			0.02	0.992468
	0.0233333	0.988417		0.0233333	0.833557			0.0233333	0.989073
	0.0266667	0.985064		0.0266667	0.826585			0.0266667	0.983091
	0.03	0.979731		0.03	0.817906			0.03	0.970016
	0.0333333	0.973727		0.0333333	0.793111			0.0333333	0.947003
	0.0366667	0.967882		0.0366667	0.780726			0.0366667	0.892551
	0.04	0.960137		0.04	0.76499			0.04	0.777684
	0.0433333	0.941369		0.0433333	0.734122			0.0433333	0.681143
	0.0466667	0.923317		0.0466667	0.717973			0.0466667	0.638607
	0.05	0.889098		0.05	0.683108			0.05	0.643578
	0.0533333	0.851002		0.0533333	0.656267			0.0533333	0.587551
	0.0566667	0.861748		0.0566667	0.623426			0.0566667	0.556166
	0.06	0.88592		0.06	0.59056			0.06	0.551747
	0.0633333	0.888058		0.0633333	0.544433			0.0633333	0.555339
	0.0666667	0.89345		0.0666667	0.516504			0.0666667	0.559018
	0.07	0.887495		0.07	0.450375			0.07	0.502413
	0.0733333	0.869785		0.0733333	0.407871			0.0733333	0.469281
	0.0766667	0.849729		0.0766667	0.353349			0.0766667	0.46239
	0.08	0.812095		0.08	0.304833			0.08	0.4994
	0.0833333	0.775273		0.0833333	0.27223			0.0833333	0.497295
	0.0866667	0.739364		0.0866667	0.248905			0.0866667	0.497017
	0.09	0.745586		0.09	0.260045			0.09	0.459056
	0.0933333	0.76559		0.0933333	0.268411			0.0933333	0.414199
	0.0966667	0.778696		0.0966667	0.303241			0.0966667	0.398724
	0.1	0.77467		0.1	0.336446			0.1	0.41672
	0.103333	0.770282		0.103333	0.375323			0.103333	0.416531
	0.106667	0.747104		0.106667	0.40331			0.106667	0.411221
	0.11	0.722179		0.11	0.420457			0.11	0.366843
	0.113333	0.689832		0.113333	0.413479			0.113333	0.342759
	0.116667	0.645218		0.116667	0.380918			0.116667	0.312833
	0.12	0.607681		0.12	0.324177			0.12	0.307598
	0.123333	0.606604		0.123333	0.260434			0.123333	0.309646
	0.126667	0.615581		0.126667	0.1828			0.126667	0.323738
	0.13	0.638121		0.13	0.117451			0.13	0.312104
	0.133333	0.634891		0.133333	0.053035			0.133333	0.272078
	0.136667	0.629002		0.136667	0.000841803			0.136667	0.228057
	0.14	0.616865		0.14	-0.0225771			0.14	0.222489
	0.143333	0.59322		0.143333	-0.0474968			0.143333	0.244545
	0.146667	0.568015		0.146667	-0.0489865			0.146667	0.274055
	0.15	0.522522		0.15	-0.0496914			0.15	0.271944
	0.153333	0.483806		0.153333	-0.0432726			0.153333	0.221466
	0.156667	0.467099		0.156667	-0.0378181			0.156667	0.177119
	0.16	0.470415		0.16	-0.029618			0.16	0.181613
	0.163333	0.479305		0.163333	-0.0269455			0.163333	0.202612
	0.166667	0.480653		0.166667	-0.0235019			0.166667	0.223431
	0.17	0.472631		0.17	-0.029749			0.17	0.202164
	0.173333	0.461146		0.173333	-0.03352			0.173333	0.155251
	0.176667	0.434244		0.176667	-0.0401341			0.176667	0.142026
	0.18	0.413856		0.18	-0.041934			0.18	0.15327
	0.183333	0.393319		0.183333	-0.0410656			0.183333	0.165236
	0.186667	0.357131		0.186667	-0.0501759			0.186667	0.156828
	0.19	0.336286		0.19	-0.0348427			0.19	0.138949
	0.193333	0.326621		0.193333	-0.0311817			0.193333	0.128156
	0.196667	0.319713		0.196667	-0.0149032			0.196667	0.13425
	0.2	0.317042		0.2	0.00343554			0.2	0.132584
	0.203333	0.313893		0.203333	0.0274335			0.203333	0.109087
	0.206667	0.299351		0.206667	0.054594			0.206667	0.0960861
	0.21	0.294708		0.21	0.0739292			0.21	0.0933009
	0.213333	0.270784		0.213333	0.0947287			0.213333	0.102577
	0.216667	0.255769		0.216667	0.115355			0.216667	0.104877
	0.22	0.225562		0.22	0.120641			0.22	0.0835047
	0.223333	0.210681		0.223333	0.119691			0.223333	0.0736315
	0.226667	0.197999		0.226667	0.112202			0.226667	0.0646007
	0.23	0.190669		0.23	0.0937446			0.23	0.0755839
	0.233333	0.184481		0.233333	0.0718759			0.233333	0.0830068
	0.236667	0.176894		0.236667	0.0449771			0.236667	0.0785156
	0.24	0.165986		0.24	0.0210983			0.24	0.0666662
	0.243333	0.161503		0.243333	-0.00461712			0.243333	0.056197
	0.246667	0.149108		0.246667	-0.0242359			0.246667	0.0526939
	0.25	0.13679		0.25	-0.0472941			0.25	0.0607453
	0.253333	0.123651		0.253333	-0.0499405			0.253333	0.0595877
	0.256667	0.103686		0.256667	-0.0623649			0.256667	0.051022
	0.26	0.102461		0.26	-0.0610702			0.26	0.0455
	0.263333	0.0923332		0.263333	-0.0575697			0.263333	0.0449154
	0.266667	0.0826481		0.266667	-0.0501642			0.266667	0.043714
	0.27	0.0673361		0.27	-0.0454369			0.27	0.0436388
	0.273333	0.0663935		0.273333	-0.039724			0.273333	0.0451073
	0.276667	0.0586968		0.276667	-0.0313943			0.276667	0.0372874
	0.28	0.0538759		0.28	-0.0359147			0.28	0.0415301
	0.283333	0.0508322		0.283333	-0.0307137			0.283333	0.0420295
	0.286667	0.054025		0.286667	-0.0410847			0.286667	0.0450544
	0.29	0.0425162		0.29	-0.0453486			0.29	0.0338953
	0.293333	0.0455752		0.293333	-0.0530002			0.293333	0.0345567
	0.296667	0.0346217		0.296667	-0.0650873			0.296667	0.0387686
	0.3	0.0242831		0.3	-0.0729297			0.3	0.041374
	0.303333	0.0162715		0.303333	-0.0815471			0.303333	0.04037
	0.306667	0.0140604		0.306667	-0.0887274			0.306667	0.0295778
	0.31	0.0108781		0.31	-0.0910526			0.31	0.0225378
	0.313333	0.00490037		0.313333	-0.0909963			0.313333	0.021083
	0.316667	0.00467834		0.316667	-0.090012			0.316667	0.0214664
	0.32	0.0033513		0.32	-0.0797237			0.32	0.0272047
	0.323333	-0.00261398		0.323333	-0.0665708			0.323333	0.0233974
	0.326667	-0.00502249		0.326667	-0.0555633			0.326667	0.0161561
	0.33	-0.0145171		0.33	-0.0348176			0.33	0.013035
	0.333333	-0.0133739		0.333333	-0.02751			0.333333	0.00852959
