# Supplementary material for: Deciphering a hexameric protein complex with Angstrom optical resolution
Source: eLife journal article supplement (doi:10.7554/elife.76308), 2022-05-13
Supplement: fig4-data1 [file Figure_4-source data 1.xlsx]

## Sheet: Sheet1
					Distance histogram obtained from the 2 polarization states
	Molecule	Distance (nm)	Localization precesion (nm)
	1	13.6466	1.05405
	2	81.2531	0.896987
	3	20.6572	0.285574
	4	21.8302	0.325555
	5	20.7837	0.380872
	6	8.15026	0.281791
	7	11.0494	0.387861
	8	10.5258	0.461617
	9	14.066	0.369043
	10	16.9537	0.284038
	11	20.1954	0.189372
	12	28.5054	12.7097
	13	9.66715	3.82486
	14	14.0806	0.14634
	15	138.723	0.243662
	16	86.4347	0.981178
	17	16.5914	0.13464
	18	2.22245	0.221459
	19	7.89295	0.175948
	20	6.74002	0.787763
	21	14.3534	3.2566
	22	4.1653	0.0693123
	23	8.55735	0.720222
	24	71.7477	0.344066
	25	35.3124	0.17608
	26	15.0997	7.27262
	27	15.6125	0.497594
	28	11.5223	1.85156
	29	19.3651	0.217406
	30	19.8553	3.92291
	31	7.36807	0.152536
	32	24.0739	0.61991
	33	5.53559	5.7265
	34	20.9093	0.214375
	35	8.99544	0.247614
	36	7.1409	0.188968
	37	24.4173	0.357993
	38	7.03097	2.70763
	39	15.6595	0.458726
	40	15.9629	0.456074
	41	3.7162	0.328802
	42	10.6869	3.72997
	43	294.406	8.13666
	44	51.2933	16.8449
	45	11.5031	4.74989
	46	1.61955	0.711655
	47	11.0773	0.29564
	48	36.0335	0.198396
	49	12.9314	0.431461
	50	52.4565	8.56744
	51	7.79791	1.14796
	52	4.12141	2.9598
	53	111.203	9.85043
	54	72.8307	41.5295
	55	17.9669	0.257759
	56	11.4881	3.57254
	57	9.76362	4.49996
	58	13.7201	0.229423
	59	264.827	0.290351
	60	3.55874	0.697351
	61	17.4249	1.59361
	62	7.32597	0.536609
	63	98.9591	6.55735
	64	71.3566	2.65291
	65	12.8209	2.44699
	66	40.3854	0.524223
	67	51.2537	7.78617
	68	12.6365	3.63602
	69	261.232	2.29925
	70	129.726	3.29826
	71	50.7016	11.9961
	72	25.3322	0.096924
	73	12.6579	0.812126
	74	10.0167	3.95513
	75	400.974	0.225804
	76	11.7574	1.33697
	77	15.508	1.47534
	78	12.5488	1.763
	79	63.1372	19.0375
	80	13.9167	0.380613
	81	35.1588	0.443393
	82	61.6926	0.464582
	83	17.666	3.71219
	84	38.0037	0.538073
	85	13.8078	0.37302
	86	31.1101	1.19273
	87	2.84616	0.430636
	88	12.2305	0.542179
	89	12.4141	0.237593
	90	23.3919	1.04861
	91	59.9749	1.83534
	92	20.9226	0.573248
	93	10.4256	0.118025
	94	10.0945	2.07009
	95	50.1244	1.43869
	96	28.5868	0.411383
	97	35.5174	0.797828
	98	14.1844	1.40662
	99	4.82105	0.628303
	100	56.9068	18.2753
	101	23.7098	0.674769
	102	91.7988	40.875
	103	53.9498	0.686022
	104	6.62495	4.6049
	105	10.8695	0.197388
	106	4.00199	0.994831
	107	18.578	1.21448
	108	37.5359	0.753868
	109	18.7036	0.669436
	110	7.31157	4.6539
	111	13.87	0.21272
	112	23.5706	0.259336
	113	448.249	6.88264
	114	36.7428	0.351881
	115	32.3249	2.01374
	116	0.990571	2.97005
	117	61.0843	2.60593
	118	13.7477	0.363672
	119	15.0188	9.30851
	120	18.6213	1.16812
	121	22.5927	1.29964
	122	28.0293	0.462345
	123	8.80446	0.249611
	124	49.7759	1.53109
	125	19.9213	0.52002
	126	23.8091	0.417444
	127	24.6055	0.288927
	128	23.6277	0.229047
	129	38.6291	1.3406
	130	18.3569	1.02651
	131	126.652	0.85389
	132	91.9305	1.92376
	133	22.1259	1.68819
	134	13.4261	0.230922
	135	4.69742	1.97081
	136	21.1395	1.15482
	137	27.6813	0.38326
	138	0.262836	1.67963
	139	14.2988	0.834492
	140	14.3379	0.514929
	141	259.966	56.2402
	142	55.0107	1.09795
	143	12.7664	1.56258
	144	763.373	10.3443
	145	13.8797	0.404991
	146	6.68056	1.46605
	147	14.1278	0.312826
	148	25.7945	1.14921
	149	19.8414	1.5167
	150	14.7838	0.527212
	151	6.96172	0.569693
	152	19.7107	0.912505
	153	10.0701	0.488619
	154	26.9159	0.412648
	155	18.3141	12.1417
	156	20.8649	0.671499
	157	23.2061	0.285432
	158	217.487	8.44191
	159	13.9567	4.46977
	160	23.4699	0.72018
	161	22.6142	1.08402
	162	35.3138	10.1468
	163	42.8881	0.292082
	164	4.69357	0.27538
	165	8.13057	0.176743
	166	3.67138	1.77434
	167	56.5235	2.89514
	168	10.1965	0.299714
	169	18.7375	4.3725
	170	217.847	0.773413
	171	87.5604	13.4558
	172	17.5187	0.207882
	173	65.4673	9.55078
	174	180.164	66.465
	175	11.3906	0.304201
	176	16.1281	0.239895
	177	7.81725	2.60701
	178	4.7699	0.151441
	179	26.2744	0.528385
	180	41.0968	0.739611
	181	59.2311	3.04329
	182	3.65294	0.593054
	183	12.5169	0.127926
	184	9.74416	0.286729
	185	596.737	1.73435
	186	11.1022	0.426354
	187	109.225	0.56011
	188	7.65711	0.16407
	189	89.3982	4.87155
	190	18.6815	0.383484
	191	39.0211	0.565247
	192	17.7487	5.47356
	193	5.26934	4.22215
	194	35.3937	1.35061
	195	48.9056	0.300053
	196	45.8333	0.563869
	197	37.5839	0.296008
	198	8.33206	0.329646
	199	4.87321	0.632578
	200	25.3119	0.671196
	201	1.30393	0.270049
	202	32.4317	0.35576
	203	2.22031	0.950428
	204	24.301	1.38621
	205	14.2508	0.238657
	206	6.20573	0.734908
	207	93.4204	3.02425
	208	18.9318	0.237832
	209	14.0945	0.679952
	210	22.4401	0.55538
	211	15.1165	0.191019
	212	57.7508	0.883009
	213	40.8265	0.304571
	214	9.65111	3.50187
	215	49.0182	0.59907
	216	34.4245	0.804804
	217	127.201	12.1164
	218	26.0381	0.238223
	219	77.5563	0.332941
	220	15.4497	0.235796
	221	16.4321	0.269028
	222	12.0001	0.25608
	223	10.5267	0.193672
	224	30.2336	3.92672
	225	7.1377	0.22162
	226	38.6936	3.91154
	227	12.9469	1.24182
	228	105.084	7.42575
	229	6.94484	0.827357
	230	6.58497	29.5945
	231	38.0865	0.923793
	232	37.1286	2.45791
	233	0.0780609	1.45288
	234	20.5784	0.338588
	235	8.13081	4.98065
	236	8.16812	2.00498
	237	18.8959	0.297429
	238	24.8321	22.1368
	239	11.9552	6.09809
	240	20.4734	12.2753
	241	10.0053	3.37338
	242	24.169	16.0922
	243	3.99642	0.601801
	244	9.11311	0.19123
	245	37.1806	2.55794
	246	12.8732	4.09034
	247	8.55863	0.324431
	248	19.4609	1.95406
	249	2.58278	0.789295
	250	67.1569	6.55184
	251	11.384	0.267775
	252	24.7771	0.141142
	253	3.30107	2.50006
	254	29.3707	0.473769
	255	20.995	5.09539
	256	22.8335	10.9725
	257	1.10333	0.214001
	258	3.33318	0.273568
	259	14.5468	0.305013
	260	45.3359	0.636683
	261	5.58545	0.536035
	262	4.40867	3.08599
	263	21.9641	0.276218
	264	7.95799	0.28107
	265	16.1834	0.225695
	266	3.13533	0.253471
	267	32.9577	0.415796
	268	9.03443	0.220267
	269	6.22251	0.60333
	270	21.0615	0.373462
	271	182.21	2.34928
	272	2.96166	0.160864
	273	21.3773	0.538383
	274	11.4393	0.241862
	275	10.3667	0.264242
	276	17.5717	0.818741
	277	42.4507	0.452624
	278	45.1532	2.61652
	279	27.3943	1.05438
	280	26.987	0.304954
	281	95.5234	4.28327
	282	10.5334	0.662079
	283	32.9601	0.691712
	284	14.5745	0.423454
	285	40.7205	6.27923
	286	4.57244	3.21668
	287	12.3408	0.457102
	288	13.0249	0.637887
	289	13.6745	7.49305
	290	17.8152	3.89793
	291	3.00906	0.50805
	292	20.9507	2.65428
	293	13.6144	0.445186
	294	48.7383	4.67279
	295	9.20061	7.93283
	296	115.388	0.337499
	297	45.3425	1.9509
	298	88.8099	0.608605
	299	5.267	0.239975
	300	17.9397	0.295899
	301	3.61828	0.205632
	302	9.17554	0.72359
	303	19.3924	0.866644
	304	12.2603	0.608908
	305	4.64512	0.707469
	306	9.26035	6.07969
	307	16.7821	0.51964
	308	24.2859	0.179265
	309	32.1781	0.202408
	310	14.4008	5.65165
	311	9.27979	0.117013
	312	9.90321	0.332331
	313	8.51603	0.155808
	314	8.2055	0.197945
	315	31.7715	2.47878
	316	9.98493	0.403301
	317	67.9923	0.359772
	318	20.7004	0.521213
	319	11.1316	0.240644
	320	59.4018	0.562534
	321	5.76223	1.39064
	322	36.0707	0.66608
	323	15.41	0.411521
	324	40.1569	1.95556
	325	14.9493	0.38227
	326	4.1981	0.24667
	327	8.85556	0.267807
	328	9.73955	0.330051
	329	11.8618	0.553035
	330	8.15317	0.544893
	331	27.3835	0.250779
	332	14.3171	0.263697
	333	10.6931	0.504434
	334	13.47	3.73089
	335	27.8954	0.888595
	336	24.2673	0.19288
	337	21.1937	0.256264
	338	17.8585	1.44186
	339	36.2315	0.264232
	340	65.504	2.35775
	341	19.27	0.399393
	342	8.4686	0.188961
	343	188.6	0.227692
	344	379.657	2.30638
	345	14.5814	0.473731
	346	6.98569	0.465533
	347	15.6202	0.841852
	348	10.0534	0.283933
	349	8.33442	4.24614
	350	5.82126	0.520022
	351	4.62738	0.208656
	352	3.89325	0.592335
	353	40.8787	7.42424
	354	5.66702	0.522071
	355	9.82896	0.639906
	356	11.4399	0.46705
	357	31.8431	0.386007
	358	11.7388	0.809134
	359	283.64	5.3659
	360	71.5947	0.556193
	361	19.1188	0.331283
	362	5.00317	0.174823
	363	30.7073	0.672504
	364	279.253	31.3342
	365	10.3929	0.284067
	366	18.1894	0.273869
	367	12.6516	0.190862
	368	8.55618	2.25507
	369	27.6306	0.374987
	370	19.4962	0.282264
	371	47.025	6.74026
	372	4.90714	0.359333
	373	12.9981	0.473077
	374	27.5041	0.413127
	375	14.2486	0.473398
	376	90.8224	26.1773
	377	3.74275	1.40207
	378	40.0218	0.627791
	379	5.59304	0.400871
	380	15.2663	1.21712
	381	1.84401	0.407582
	382	68.533	15.2083
	383	66.2898	5.86675
	384	5.71598	0.657438
	385	18.6626	0.351324
	386	8.45082	0.543113
	387	10.3249	2.66483
	388	835.375	9.96317
	389	176.424	0.296773
	390	6.47297	0.140518
	391	5.76847	0.189081
	392	16.1955	2.48349
	393	6.32018	0.308874
	394	62.8432	1.53411
	395	18.3901	8.90995
	396	16.1882	0.412531
	397	7.11639	0.305756
	398	3.12054	0.384606
	399	44.2643	0.947997
	400	13.4128	1.57117
	401	39.4918	0.216783
	402	3.2152	0.225766
	403	12.0764	0.355618
	404	4.41237	0.29465
	405	17.8806	0.36763
	406	26.0301	1.29395
	407	28.5211	1.25518
	408	92.1966	0.999989
	409	4.86281	0.322784
	410	9.51222	0.128153
	411	17.966	0.160968
	412	5.96303	0.134641
	413	4.08317	0.270311
	414	13.4418	0.982063
	415	9.75334	0.15308
	416	0.619262	0.695347
	417	12.3338	1.46417
	418	11.7227	2.74906
	419	6.36989	0.455592
	420	25.4847	0.789953
	421	6.5459	1.08209
	422	24.7771	3.4014
	423	12.6553	0.738072
	424	8.8767	1.40252
	425	18.5154	0.625034
	426	10.486	0.172179
	427	10.4648	0.188899
	428	12.3864	1.5806
	429	22.4866	0.192917
	430	2.1453	0.175953
	431	27.0254	2.86447
	432	16.18	0.129459
	433	3.87082	0.331419
	434	27.7055	0.176426
	435	1.47842	0.143283
	436	40.4671	2.74229
	437	19.7663	1.08942
	438	14.2624	0.365461
	439	30.8127	0.3436
	440	15.2132	0.258691
	441	10.893	0.395126
	442	29.2059	0.431846
	443	11.1245	0.301186
	444	5.80357	0.19693
	445	10.8683	0.280938
	446	40.9034	0.380969
	447	8.6915	1.33412
	448	18.3801	0.646572
	449	1.73891	26.3604
	450	40.0596	0.501972
	451	9.01486	0.218191
	452	22.3264	0.988284
	453	12.6043	0.198532
	454	38.595	0.237315
	455	4.63637	1.61492
	456	2.85261	0.573601
	457	10.0155	0.408568
	458	11.7136	0.177079
	459	6.18293	0.212568
	460	60.5948	2.25649
	461	59.6218	1.44935
	462	15.2864	0.229142
	463	15.6842	0.345758
	464	7.20657	2.07256
	465	1.52992	0.189391
	466	7.18285	0.379829
	467	15.4736	0.41117
	468	59.0816	7.06581
	469	18.8397	1.18451
	470	11.1474	2.00594
	471	7.87351	0.900528
	472	22.625	1.10269
	473	6.97183	0.974298
	474	22.5464	0.530421
	475	2.54382	0.235032
	476	110.108	0.532173
	477	18.8459	1.10661
	478	32.4887	39.5267
	479	9.26346	4.53407
	480	9.70825	0.128448
	481	19.6826	0.969137
	482	28.507	0.30544
	483	48.7958	0.618413
	484	127.375	24.2874
	485	13.5559	0.549917
	486	29.1055	17.9206
	487	24.522	0.338552
	488	37.6932	0.250099
	489	18.125	0.427053
	490	23.226	1.71781
	491	46.828	0.544677
	492	22.274	0.405889
	493	39.0582	1.93886
	494	10.7711	0.176982
	495	9.13045	0.288691
	496	12.4915	0.275059
	497	2.38203	6.39583
	498	11.5725	0.119452
	499	13.7478	0.177111
	500	8.02526	0.279112
	501	6.04546	0.372393
	502	2.50961	0.342042
	503	13.4985	0.191641
	504	12.6098	0.300787
	505	6.23615	0.299776
	506	16.1825	0.65662
	507	11.321	0.391106
	508	7.31955	0.154867
	509	13.0066	0.326779
	510	5.58215	0.25236
	511	18.2294	0.297716
	512	5.56117	0.420258
	513	6.30452	0.272004
	514	16.5347	0.505995
	515	9.10474	0.219615
	516	12.541	0.144111
	517	12.9603	0.311468
	518	4.59612	0.459312
	519	11.0518	0.0941882
	520	7.87933	0.296807
	521	5.80723	0.272884
	522	11.3078	0.468797
	523	16.3145	0.257213
	524	4.6533	0.266812
	525	13.3145	0.353863
	526	9.34449	0.16126
	527	16.0877	0.388431
	528	6.55824	0.330331
	529	12.824	0.222816
	530	5.5502	0.299123
	531	64.6965	1.15241
	532	5.02676	0.285066
	533	20.4299	0.353041
	534	37.4898	6.23955
	535	4.47064	0.585168
	536	11.3021	0.254223
	537	5.48402	2.87768
	538	2.5026	0.261542
	539	15.4653	5.0166
	540	3.19891	0.282295
	541	9.95137	1.71861
	542	12.893	0.257842
	543	7.68656	0.0971621
	544	5.76221	0.0886698
	545	30.6562	0.0128431
	546	15.1183	0.14686
	547	23.0594	0.32169
	548	8.06759	0.231778
	549	8.06106	0.306457
	550	12.6635	0.259379
	551	7.67395	8.34873
	552	6.30299	0.364305
	553	181.566	4.14284
	554	14.2738	0.306118
	555	25.4451	0.311344
	556	5.73268	0.115926
	557	5.51444	0.25555
	558	6.25974	0.245983
	559	5.42881	0.278444
	560	1.06437	0.395594
	561	17.2637	0.37421
	562	2.60896	0.605304
	563	15.9257	0.121986
	564	11.3441	0.216938
	565	1.78546	0.10091
	566	11.7408	0.109149
	567	2.32645	0.222636
	568	42.951	0.444145
	569	7.65326	0.223052
	570	15.8965	0.386694
	571	86.2245	28.0231
	572	1.75719	0.298323
	573	9.24391	0.82752
	574	10.189	0.0828108
	575	17.0073	0.335529
	576	11.6254	0.226128
	577	15.5478	0.857244
	578	2.62862	0.140067
	579	12.4145	1.29822
	580	13.2819	0.35896
	581	15.9007	0.187248
	582	27.2778	0.402828
	583	19.9567	0.252637
	584	11.3987	0.127437
	585	13.0739	0.182246
	586	17.9257	0.285369
	587	3.97752	0.0562592
	588	3.83418	3.91535
	589	42.1453	7.67727
	590	8.59241	0.247586
	591	4.9706	0.192386
	592	6.19518	0.266025
	593	4.47575	0.124057
	594	4.4337	0.220108
	595	4.43275	0.179388
	596	578.7	6.50536
	597	3.10597	0.0857105
	598	9.49676	0.77882
	599	3.0104	0.806605
	600	0.699912	0.345401
	601	1.21961	0.280931
	602	8.08849	0.514942
	603	0.675823	0.848624
	604	699.798	0.11643
	605	6.14657	0.31865
	606	156.233	12.6574
	607	8.88236	0.243521
	608	1.24195	0.253358
	609	18.0307	0.294577
	610	2.12848	0.203616
	611	24.1333	5.34533
	612	13.3871	0.142572
	613	11.3023	0.272035
	614	14.9051	0.388418
	615	58.6802	10.0561
	616	48.1239	9.0692
	617	6.64081	0.147115
	618	2.80117	0.223616
	619	15.7415	0.238906
	620	13.9896	0.251976
	621	159.759	49.5635
	622	603.356	1.67992
	623	13.4554	13.6505
	624	16.9692	0.165648
	625	7.26416	0.210129
	626	18.7265	0.11656
	627	16.3824	0.913322
	628	8.03368	0.183183
	629	12.9841	0.423924
	630	119.321	47.5337
	631	168.228	0.513301
	632	19.9484	24.1775
	633	7.32783	0.233822
	634	8.45775	0.186874
	635	3.87855	0.387891
	636	2.89287	0.201135
	637	7.24713	0.160649
	638	11.1652	0.37701
	639	20.9325	0.247937
	640	11.4522	0.562869
	641	23.9109	4.21098
	642	5.52474	0.322943
	643	11.1392	0.328175
	644	3.69012	0.245186
	645	19.6687	0.464907
	646	29.4284	3.70916
	647	7.34985	0.397088
	648	4.26658	0.156006
	649	13.4876	0.130767
	650	16.5553	0.216541
	651	12.3323	0.212056
	652	15.5879	0.233617
	653	16.2382	0.422614
	654	4.67886	0.281264
	655	15.9898	5.43333
	656	7.932	0.459039
	657	15.9726	0.361421
	658	4.86421	0.188584
	659	36.1547	8.79567
	660	25.628	1.03878
	661	6.6099	1.34767
	662	19.1406	0.139968
	663	148.498	0.643136
	664	10.8351	0.176706
	665	10.9448	3.08892
	666	12.3165	0.266727
	667	19.4877	0.319237
	668	13.0135	0.20732
	669	9.59347	0.495705
	670	4.618	0.361553
	671	23.5802	0.178687
	672	18.2677	0.226833
	673	132.407	0.229024
	674	23.5493	0.186756
	675	13.0276	0.276982
	676	14.7857	0.416738
	677	18.6821	0.178278
	678	4.05373	0.154303
	679	9.56921	0.214316
	680	3.87506	0.240649
	681	10.7083	0.303606
	682	14.0775	0.204908
	683	10.3468	3.92011
	684	15.409	0.200106
	685	364.628	5.43138
	686	10.9198	0.343215
	687	11.4792	18.3618
	688	16.4433	0.479993
	689	15.0247	0.770531
	690	39.157	8.62916
	691	14.958	0.355755
	692	14.2086	0.280898
	693	84.2955	0.501981
	694	6.03826	0.467439
	695	3.12746	0.454149
	696	3.67657	0.209269
	697	7.24484	0.19314
	698	70.9714	0.520773
	699	8.64318	0.434889
	700	21.9023	1.75326
	701	16.8884	0.231353
	702	17.8013	0.182229
	703	9.47138	0.372224
	704	11.6825	0.372381
	705	11.9027	0.184424
	706	6.92642	0.222343
	707	22.1746	0.173237
	708	2.17837	0.379327
	709	12.8769	0.418431
	710	16.444	0.327148
	711	14.4012	0.229559
	712	148.225	1.56249
	713	12.8627	0.2531
	714	2.20624	0.238643
	715	15.3206	0.257043
	716	13.4932	3.40501
	717	18.4884	0.539862
	718	13.8998	0.172754
	719	5.34513	0.174815
	720	15.0409	0.182153
	721	15.0238	0.271942
	722	185.762	1.13576
	723	12.9648	0.330169
	724	5.9542	0.0838644
	725	30.9533	6.45638
	726	11.6653	0.770416
	727	1.76914	0.325907
	728	5.40848	0.40778
	729	10.9309	0.291078
	730	30.9109	0.241999
	731	13.3364	1.50493
	732	30.359	0.252838
	733	23.9804	4.02172
	734	13.9903	0.707806
	735	16.0318	0.267129
	736	0.748862	0.335399
	737	13.2465	0.197865
	738	14.2175	0.250748
	739	12.0546	0.162866
	740	4.23576	0.189516
	741	3.4066	0.259613
	742	7.19477	0.681409
	743	18.6811	0.207348
	744	1.96545	0.201548
	745	57.0553	0.163543
	746	240.467	49.4395
	747	11.2959	0.203872
	748	7.01536	4.04035
	749	29.9132	0.0453252
	750	14.2766	0.210907
	751	5.08883	0.548905
	752	7.83999	0.32633
	753	5.57011	0.13713
	754	5.34394	0.723236
	755	3.47137	0.319874
	756	7.27783	0.354064
	757	11.9995	0.519847
	758	8.3921	0.0909714
	759	19.9536	0.276884
	760	11.1115	0.135155
	761	11.6382	1.78108
	762	5.79715	0.214683
	763	20.3267	0.207805
	764	19.0128	0.151669
	765	2.09772	0.228892
	766	5.62039	5.30091
	767	13.4767	5.43129
	768	12.7267	0.421789
	769	4.722	0.10974
	770	13.1533	1.76602
	771	7.6095	0.377628
	772	32.864	0.183919
	773	8.72327	0.144574
	774	8.6079	0.673612
	775	5.05689	0.261505
	776	7.71856	0.161532
	777	13.1078	0.222004
	778	539.171	2.15692
	779	1.42871	0.563394
	780	100.609	52.3445
	781	7.69226	0.157552
	782	15.5089	0.125544
	783	19.5216	2.26474
	784	6.64689	1.53731
	785	13.0498	0.1354
	786	15.6468	0.490637
	787	4.7085	0.153309
	788	6.6492	0.171649
	789	14.345	0.212467
	790	10.845	0.443668
	791	10.7513	0.1467
	792	11.116	1.71449
	793	11.2628	0.201831
	794	47.6009	0.38841
	795	5.09224	0.365442
	796	11.2869	0.27483
	797	4.33484	0.10809
	798	15.3245	0.298974
	799	1.05784	2.01276
	800	4.50009	3.32136
	801	7.49168	0.285699
	802	8.5737	0.413654
	803	5.37556	0.137338
	804	7.45125	0.396767
	805	2.47289	0.250276
	806	20.0806	0.389777
	807	15.7731	0.468005
	808	9.35045	0.271878
	809	5.60145	0.324982
	810	10.2544	0.674647
	811	10.5344	0.109885
	812	17.1253	0.178079
	813	21.5442	0.151367
	814	14.0745	0.266881
	815	13.1206	0.188683
	816	6.08556	0.144799
	817	12.1251	2.66804
	818	8.262	0.230507
	819	1.60185	0.249842
	820	5.74597	0.161139
	821	1.83085	0.904987
	822	6.22848	0.363809
	823	22.8173	1.96159
	824	5.87757	0.285317
	825	0.622122	0.126512
	826	27.4401	0.149322
	827	17.5334	0.258312
	828	10.4244	0.299015
	829	385.203	1.02029
	830	17.661	1.5386
	831	18.8695	0.233716
	832	6.15442	0.3647
	833	19.3367	0.190992
	834	9.88308	2.27386
	835	9.32025	0.11757
	836	13.8174	0.264594
	837	1.66889	0.527322
	838	11.2075	0.48512
	839	8.3644	0.131149
	840	15.8613	0.215675
	841	11.2872	0.0967459
	842	17.2343	0.531029
	843	7.9404	1.01198
	844	0.700731	0.225562
	845	5.23499	0.150523
	846	10.2877	0.218226
	847	3.79418	2.2437
	848	3.90023	0.239296
	849	15.6874	0.273506
	850	4.1398	0.263775
	851	10.5612	0.28246
	852	12.4737	0.0942322
	853	56.1203	3.85125
	854	21.2497	13.2245
	855	287.177	2.83636
	856	6.66116	0.333954
	857	8.29233	0.334352
	858	8.94741	0.339878
	859	35.008	11.2357
	860	3.72818	0.372464
	861	3.60493	0.22994
	862	6.77134	0.306681
	863	8.43401	0.171386
	864	10.3024	0.242654
	865	13.2366	0.267452
	866	14.8219	0.4184
	867	6.52796	0.192071
	868	4.04964	1.02101
	869	4.25142	0.27181
	870	17.7192	0.453045
	871	23.0141	0.449615
	872	15.0093	0.554935
	873	8.05727	1.72366
	874	23.6945	0.20764
	875	17.5068	0.234589
	876	10.9981	0.166487
	877	307.454	2.51677
	878	3.93582	0.251901
	879	9.73901	0.369174
	880	14.4392	0.439962
	881	12.0159	1.405
	882	14.4086	0.63996
	883	23.6538	0.162889
	884	25.7066	0.322259
	885	21.4772	0.453155
	886	18.8034	0.23238
	887	7.33925	0.104484
	888	32.7565	0.173799
	889	13.0728	0.0968939
	890	6.15842	0.331689
	891	8.71709	0.105335
	892	17.742	0.555225
	893	17.3953	0.304332
	894	10.5831	0.681899
	895	107.39	1.79381
	896	3.04681	6.66462
	897	23.0654	0.536989
	898	4.32542	0.0979268
	899	12.0153	0.482228
	900	7.27572	0.104296
	901	20.1949	0.455979
	902	29.9669	0.599598
	903	0.144254	0.496756
	904	16.1115	0.243107
	905	4.30193	0.40629
	906	9.57234	0.167919
	907	9.95027	0.28025
	908	9.90115	1.87583
	909	8.5435	0.212192
	910	9.45718	0.204244
	911	243.302	11.4774
	912	79.7289	0.417
	913	59.2522	10.9406
	914	204.103	0.0704535
	915	14.6583	0.352147
	916	4.73937	0.224322
	917	20.0147	0.372546
	918	11.1475	0.225494
	919	10.4345	0.256623
	920	6.98935	0.720186
	921	9.67568	6.28435
	922	16.8938	0.255192
	923	4.52712	2.35149
	924	4.84258	0.31175
	925	7.66087	0.16375
	926	5.48463	0.253004
	927	28.0807	0.291658
	928	10.345	0.372377
	929	20.3998	0.222426
	930	2.91408	0.425628
	931	13.664	0.140415
	932	24.4343	0.164876
	933	20.4151	0.871204
	934	18.4824	0.2382
	935	10.0871	7.87493
	936	88.1359	0.239479
	937	89.9164	0.842912
	938	21.73	5.82051
	939	4.99204	0.532805
	940	11.8642	2.54721
	941	152.655	1.50757
	942	19.6156	0.235465
	943	21.7752	0.390516
	944	14.3319	2.62225
	945	13.0696	0.299543
	946	15.2222	0.35451
	947	51.7225	1.6747
	948	4.0741	0.248242
	949	17.2128	0.210179
	950	39.7457	3.39747
	951	14.7727	0.292736
	952	19.912	0.262825
	953	8.21066	0.38875
	954	19.0199	0.247899
	955	24.0656	0.243456
	956	11.8702	0.151278
	957	11.6793	0.821906
	958	59.3811	1.73742
	959	45.3669	0.295437
	960	17.7434	0.324463
	961	7.36078	0.314317
	962	38.3979	0.63227
	963	11.4592	0.548928
	964	37.522	0.58008
	965	29.1996	0.349982
	966	5.24106	1.96876
	967	10.1997	0.2084
	968	7.0389	0.142348
	969	21.699	0.209587
	970	17.3117	0.859869
	971	17.3293	0.232168
	972	9.95926	0.196584
	973	302.377	0.641678
	974	17.3276	0.236231
	975	16.6606	5.33742
	976	119.604	0.778929
	977	11.9685	0.447914
	978	14.4382	0.956102
	979	16.0177	4.4519
	980	38.5009	0.424495
	981	20.9324	6.09562
	982	14.4632	0.278457
	983	15.6244	6.41414
	984	5.52028	0.163713
	985	20.1901	0.209755
	986	16.5241	0.210472
	987	542.157	0.855539
	988	25.7525	0.292824
	989	8.22246	1.15836
	990	21.973	0.179892
	991	109.334	31.2984
	992	18.5904	0.441923
	993	26.3239	0.488312
	994	26.3241	0.786615
	995	6.50814	0.210251
	996	15.2821	0.347121
	997	8.41477	0.232039
	998	3.32167	0.37481
	999	4.38926	0.336263
	1000	37.7729	8.79168
	1001	1.44615	0.167199
	1002	37.0582	0.302858
	1003	7.72039	0.103634
	1004	6.31607	0.663707
	1005	29.8959	12.7967
	1006	11.8725	0.777326
	1007	6.2581	0.187962
	1008	13.4531	8.64472
	1009	14.4744	8.47086
	1010	114.746	24.3766
	1011	27.4645	4.3272
	1012	2.646	1.02391
	1013	23.7658	0.450564
	1014	179.674	0.932649
	1015	15.5433	0.17793
	1016	8.66105	0.232414
	1017	25.2743	0.231486
	1018	42.5438	14.2675
	1019	28.8763	0.943364
	1020	14.6793	0.286245
	1021	26.408	0.996065
	1022	6.02876	0.394236
	1023	69.2358	0.607862
	1024	6.07171	0.281225
	1025	7.65003	0.152438
	1026	0.382343	0.221393
	1027	16.8427	8.62928
	1028	13.5329	1.33752
	1029	129.897	0.303386
	1030	5.1725	0.105917
	1031	6.88316	0.220376
	1032	570.733	36.8099
	1033	17.5082	1.07548
	1034	12.6927	0.629204
	1035	2.24092	0.2326
	1036	8.8582	0.152605
	1037	12.494	0.373316
	1038	0.860193	0.773299
	1039	44.434	6.60504
	1040	3.95817	0.38305
	1041	14.9935	0.569777
	1042	24.127	10.5919
	1043	35.8862	1.61583
	1044	5.28419	0.475341
	1045	5.2201	0.744186
	1046	205.214	0.413472
	1047	10.0727	1.67726
	1048	6.73996	0.339191
	1049	15.0626	0.827759
	1050	69.4553	0.361925
	1051	11.5916	1.54286
	1052	10.1106	0.944618
	1053	16.5008	1.04024
	1054	17.9807	15.7147
	1055	133.885	1.12435
	1056	293.915	0.452803
	1057	15.4993	3.59965
	1058	4.45513	0.5876
	1059	29.018	0.624662
	1060	4.47732	1.8051
	1061	39.9882	10.95
	1062	68.7624	18.0634
	1063	296.738	1.54887
	1064	11.7225	2.31476
	1065	22.5019	0.208045
	1066	9.97118	2.27509
	1067	181.999	4.97072
	1068	407.76	1.9163
	1069	4.35236	1.71796
	1070	21.1135	0.298987
	1071	594.037	1.88855
	1072	65.8283	11.5927
	1073	55.4391	15.7412
	1074	5.23079	0.19246
	1075	15.1452	0.4001
	1076	1.93644	0.754784
	1077	3.9916	2.46949
	1078	11.8172	5.44798
	1079	19.6383	0.495503
	1080	13.3694	0.380698
	1081	80.5878	5.79899
	1082	10.9073	4.49855
	1083	20.5461	0.411359
	1084	7.82199	0.648828
	1085	126.235	6.15602
	1086	7.74629	0.190004
	1087	30.1577	1.34745
	1088	144.206	0.686796
	1089	175.874	0.330744
	1090	35.0701	3.02691
	1091	12.9369	0.212411
	1092	7.62701	0.589117
	1093	1.75605	0.38521
	1094	30.8401	7.17389
	1095	375.697	7.89018
	1096	32.924	0.692834
	1097	115.344	0.607316
	1098	12.8892	2.63736
	1099	36.9942	1.22946
	1100	32.7991	4.07468
	1101	8.91499	1.44651
	1102	52.6061	11.3461
	1103	3.41867	1.51074
	1104	19.8702	0.450421
	1105	13.3486	0.429899
	1106	39.2262	17.6673
	1107	7.96028	0.35585
	1108	8.44023	0.297186
	1109	8.70745	0.533443
	1110	31.2823	1.66565
	1111	6.86372	1.03174
	1112	13.3743	0.325391
	1113	18.9137	0.106886
	1114	63.8364	0.609902
	1115	6.18553	2.46845
	1116	2.95215	1.97217
	1117	1.30797	0.303938
	1118	40.6889	0.477676
	1119	29.1364	3.58029
	1120	7.83783	2.46821
	1121	5.76823	2.71367
	1122	73.9562	1.17243
	1123	19.0364	0.279332
	1124	14.7614	0.561063
	1125	9.28233	0.232281
	1126	10.8288	0.256913
	1127	9.49704	0.271121
	1128	6.08517	0.459851
	1129	5.30165	0.315125
	1130	6.35364	1.85024
	1131	11.6918	8.45947
	1132	27.1867	1.32051
	1133	12.6251	0.313093
	1134	1.44082	2.66929
	1135	233.871	0.168036
	1136	12.7856	5.15496
	1137	17.3822	6.12556
	1138	250.421	0.616382
	1139	3.86935	2.82766
	1140	45.9182	1.18499
	1141	21.4285	0.155335
	1142	15.494	1.17878
	1143	4.14912	3.29271
	1144	5.34694	0.270098
	1145	172.325	0.756365
	1146	4.05136	0.271704
	1147	176.518	0.374405
	1148	6.67551	0.419078
	1149	15.3338	9.73739
	1150	19.1272	0.327042
	1151	20.6056	1.09547
	1152	23.2876	0.789822
	1153	17.8303	0.269695
	1154	313.923	0.599301
	1155	4.46435	0.242741
	1156	3.77347	0.323825
	1157	7.81845	2.10075
	1158	13.3981	0.726222
	1159	25.4222	0.667959
	1160	81.814	0.684583
	1161	417.932	3.72036
	1162	570.662	4.20714
	1163	1.89069	1.33004
	1164	220.422	0.343259
	1165	5.66145	0.371042
	1166	14.0587	0.329773
	1167	8.79573	2.0876
	1168	306.999	3.94797
	1169	29.4689	0.314311
	1170	9.56234	2.42059
	1171	472.6	5.47072
	1172	8.33486	2.14409
	1173	242.057	1.30262
	1174	14.8016	1.48748
	1175	539.037	1.48648
	1176	19.5586	0.336826
	1177	18.1582	0.357637
	1178	20.2958	0.302844
	1179	9.35472	0.182516
	1180	447.984	0.781896
	1181	14.1672	0.356634
	1182	103.439	0.321637
	1183	23.7786	0.609756
	1184	45.3749	21.4033
	1185	12.9685	1.6567
	1186	10.2413	0.174782
	1187	5.71256	5.66182
	1188	23.2265	2.31466
	1189	10.1791	0.128978
	1190	190.282	0.823701
	1191	11.8847	0.745144
	1192	536.422	0.485079
	1193	7.12997	1.80169
	1194	254.71	2.51468
	1195	4.59284	0.303161
	1196	51.6601	9.1463
	1197	19.765	0.700085
	1198	13.7856	0.266443
	1199	4.78422	0.983618
	1200	30.8214	4.5686
	1201	1.06828	2.02594
	1202	485.128	0.651961
	1203	9.85686	0.894036
	1204	22.385	0.217062
	1205	11.1134	0.345301
	1206	2.44989	1.2865
	1207	9.08733	0.121693
	1208	59.6352	7.74593
	1209	156.176	0.329374
	1210	6.75988	0.702691
	1211	14.8587	0.158713
	1212	27.3269	28.601
	1213	10.4369	0.282791
	1214	388.513	1.8039
	1215	14.3316	2.37422
	1216	38.9853	0.609936
	1217	19.5523	0.350388
	1218	207.039	0.729737
	1219	12.6666	0.182282
	1220	87.9073	55.9305
	1221	254.161	0.394161
	1222	13.0692	2.89843
	1223	17.4511	0.483858
	1224	57.9674	0.14698
	1225	241.391	0.682311
	1226	83.1246	14.7738
	1227	52.4865	0.721335
	1228	405.317	1.17901
	1229	6.90228	2.5768
	1230	126.198	0.473143
	1231	11.1205	0.592578
	1232	39.142	0.188575
	1233	10.3403	0.167578
	1234	4.43391	0.620289
	1235	8.9056	0.270445
	1236	16.2681	0.691672
	1237	10.726	0.263631
	1238	2.18965	0.452465
	1239	15.1323	0.489847
	1240	223.737	73.0356
	1241	110.567	0.338179
	1242	170.333	0.69273
	1243	19.2994	0.299957
	1244	17.5953	0.491108
	1245	252.002	1.61227
	1246	43.1603	2.77573
	1247	82.1504	0.654179
	1248	90.3066	0.261285
	1249	9.71582	0.205863
	1250	54.379	0.800743
	1251	29.299	9.03972
	1252	8.46427	0.573833
	1253	26.586	0.961543
	1254	16.1194	0.800524
	1255	10.3496	0.489795
	1256	5.76833	0.22169
	1257	7.51591	0.401434
	1258	8.24742	0.851072
	1259	11.7332	0.983449
	1260	91.083	14.045
	1261	9.63565	0.350872
	1262	11.5909	0.151667
	1263	24.1589	5.92901
	1264	55.8854	0.796961
	1265	308.468	0.440181
	1266	565.803	0.82575
	1267	15.8954	3.3424
	1268	12.7123	0.76652
	1269	17.025	0.353568
	1270	5.75814	0.62332
	1271	11.07	1.14259
	1272	3.92566	0.897712
	1273	103.58	0.202485
	1274	9.17342	1.02775
	1275	1.35656	0.811501
	1276	24.2711	0.284693
	1277	200.714	0.298883
	1278	15.5198	4.78046
	1279	4.33316	4.16274
	1280	2.26913	0.257537
	1281	5.74022	0.152806
	1282	54.6256	0.181895
	1283	167.864	16.1122
	1284	24.6293	4.69241
	1285	344.113	0.520341
	1286	16.7458	0.431885
	1287	21.761	5.24497
	1288	289.712	6.46705
	1289	7.0771	0.243275
	1290	23.7407	2.41512
	1291	37.7972	6.82027
	1292	22.8316	0.430194
	1293	19.9564	13.0591
	1294	2.3147	1.4543
	1295	543.588	1.52015
	1296	163.404	0.559964
	1297	140.678	0.83214
	1298	23.2926	0.0417242
	1299	5.10712	2.60505
	1300	234.151	0.702077
	1301	5.18782	1.63072
	1302	53.5615	0.963402
	1303	14.3504	0.404706
	1304	32.126	0.280714
	1305	2.82519	1.38723
	1306	49.5582	6.92908
	1307	130.134	0.291015
	1308	194.296	8.8055
	1309	10.3567	1.59654
	1310	2.63069	0.151697
	1311	1.36091	3.11302
	1312	4.83982	0.679358
	1313	15.0585	1.85085
	1314	6.63882	1.76343
	1315	24.85	0.55226
	1316	27.63	0.0982253
	1317	6.88201	0.710139
	1318	1.24219	1.69302
	1319	14.9303	0.337688
	1320	1.85026	0.604819
	1321	9.90694	0.341409
	1322	551.861	0.90347
	1323	16.1831	2.25814
	1324	8.62483	3.28681
	1325	14.2783	0.213256
	1326	218.836	0.343808
	1327	511.522	1.14552
	1328	37.6469	9.14501
	1329	358.979	4.40486
	1330	9.86909	1.70561
	1331	8.04759	0.605194
	1332	123.563	0.571912
	1333	36.0854	5.93684
	1334	106.183	0.604825
	1335	258.221	8.56581
	1336	15.2945	0.415083
	1337	21.904	0.221432
	1338	9.29679	0.343817
	1339	7.82736	1.98494
	1340	17.1989	0.815925
	1341	258.827	1.62838
	1342	19.3412	6.48009
	1343	38.0948	0.402942
	1344	104.507	17.6762
	1345	17.4101	0.581822
	1346	26.3794	0.454892
	1347	23.5069	3.49664
	1348	10.0089	0.329254
	1349	115.081	0.576996
	1350	86.5346	13.2709
	1351	11.8762	0.316696
	1352	13.1497	0.304944
	1353	6.40815	0.27579
	1354	57.8137	6.04236
	1355	9.78725	1.47948
	1356	49.5765	0.21835
	1357	43.4201	0.263582
	1358	118.44	20.2575
	1359	6.58622	0.985836
	1360	5.05205	0.285183
	1361	5.83721	0.37299
	1362	25.1617	0.213702
	1363	14.0913	10.02
	1364	12.0118	0.711596
	1365	21.8752	0.521701
	1366	528.733	0.406674
	1367	33.2223	6.43476
	1368	31.3277	0.356514
	1369	13.1256	0.216228
	1370	22.2196	0.195397
	1371	9.05403	0.385772
	1372	262.461	1.47652
	1373	22.8005	11.4922
	1374	10.7318	2.24168
	1375	53.4934	16.9186
	1376	285.615	10.2484
	1377	6.70771	0.661671
	1378	8.16473	2.15664
	1379	9.24527	2.07543
	1380	8.93368	0.127476
	1381	10.9242	0.379506
	1382	32.2438	0.886626
	1383	169.028	0.0608437
	1384	20.4176	0.387997
	1385	254.382	0.988356
	1386	29.553	0.308807
	1387	9.63661	0.3394
	1388	256.281	0.946612
	1389	12.4458	3.01348
	1390	444.801	2.6495
	1391	11.48	3.86884
	1392	12.3038	9.61676
	1393	19.2061	0.241243
	1394	11.3808	0.293129
	1395	32.0416	0.732301
	1396	7.75943	2.66047
	1397	4.92136	0.422877
	1398	0.935295	0.429335
	1399	186.732	0.521299
	1400	64.9938	14.5063
	1401	8.64071	4.44678
	1402	185.289	1.76345
	1403	187.994	0.525734
	1404	15.4795	0.240316
	1405	8.2061	0.173627
	1406	9.2304	0.298804
	1407	18.1462	0.304987
	1408	106.516	3.22511
	1409	21.6061	0.170728
	1410	8.06575	0.283574
	1411	25.391	0.460905
	1412	88.8087	0.334162
	1413	5.4705	0.197851
	1414	28.3572	5.97004
	1415	5.97807	0.720891
	1416	7.9688	1.94099
	1417	13.6402	0.15519
	1418	3.10405	2.27663
	1419	27.6116	0.406414
	1420	25.8133	1.15973
	1421	85.9081	0.194737
	1422	277.892	0.970185
	1423	17.0077	0.294639
	1424	45.7486	27.1162
	1425	208.904	2.96813
	1426	3.02142	1.72104
	1427	13.9175	0.444947
	1428	114.316	0.98377
	1429	8.7563	2.38187
	1430	19.8428	6.73123
	1431	9.02266	0.340732
	1432	518.513	10.7644
	1433	12.469	1.30002
	1434	17.8356	0.164287
	1435	3.12601	0.144541
	1436	5.63923	0.969147
	1437	1.84295	0.157445
	1438	1.17037	0.25565
	1439	6.4365	0.295541
	1440	17.2572	4.35798
	1441	11.6801	0.201599
	1442	34.4797	14.5927
	1443	3.30301	1.66995
	1444	4.00787	5.6121
	1445	19.2434	0.212331
	1446	8.19483	1.75747
	1447	20.7335	0.255236
	1448	5.33973	0.171846
	1449	10.183	1.49606
	1450	6.08248	0.155314
	1451	12.695	0.310566
	1452	1.29458	0.309514
	1453	125.723	0.845258
	1454	13.0073	0.181828
	1455	144.035	5.57836
	1456	22.2403	0.834939
	1457	11.732	0.982112
	1458	7.14186	0.432582
	1459	13.5051	0.257573
	1460	14.767	0.0772744
	1461	134.952	17.5009
	1462	17.0069	0.190417
	1463	12.201	0.921016
	1464	30.3821	4.58606
	1465	14.2967	0.215589
	1466	25.2916	0.316314
	1467	26.839	0.251687
	1468	22.3071	0.204942
	1469	67.9248	5.57585
	1470	369.112	0.994851
	1471	33.6453	6.87334
	1472	14.3225	0.691603
	1473	7.22764	0.261597
	1474	251.843	1.00522
	1475	5.83751	0.218052
	1476	4.89881	0.70555
	1477	70.8491	3.89792
	1478	27.0201	4.42343
	1479	14.7572	8.05304
	1480	45.6185	4.02007
	1481	25.2273	0.210539
	1482	8.18969	0.206018
	1483	5.87245	0.267133
	1484	208.213	1.76039
	1485	13.198	5.90434
	1486	5.07333	0.565001
	1487	130.787	27.6874
	1488	490.491	1.0143
	1489	669.266	2.0807
	1490	350.491	1.03599
	1491	370.919	0.467197
	1492	263.127	2.64355
	1493	16.5977	5.58275
	1494	473.115	0.795953
	1495	8.91595	1.80084
	1496	6.44847	1.42385
	1497	12.0802	0.828115
	1498	3.44073	2.5647
	1499	67.0279	0.365243
	1500	24.0454	19.1436
	1501	52.1096	0.193473
	1502	7.8332	5.22662
	1503	2.51228	2.33522
	1504	8.01549	0.301776
	1505	34.1835	0.713838
	1506	275.972	0.983514
	1507	93.7222	32.7844
	1508	1.74202	0.53637
	1509	14.6299	0.257137
	1510	22.8122	0.359791
	1511	21.133	1.12921
	1512	21.2296	0.153607
	1513	8.08949	2.5293
	1514	27.4327	8.74188
	1515	11.9126	0.270414
	1516	8.28963	0.701661
	1517	125.589	0.510188
	1518	17.7502	7.51878
	1519	23.0694	7.24739
	1520	18.6084	0.752321
	1521	6.52237	0.425205
	1522	26.1881	0.381815
	1523	10.1258	8.46099
	1524	182.035	0.540601
	1525	56.3899	0.287688
	1526	53.3969	10.988
	1527	265.825	0.954998
	1528	5.80846	2.75511
	1529	48.5938	0.975785
	1530	12.5757	0.205508
	1531	325.979	0.429807
	1532	1.66098	0.392338
	1533	6.9979	0.343016
	1534	240.19	2.00896
	1535	35.2547	0.499297
	1536	9.14108	0.787407
	1537	7.13142	0.247144
	1538	28.3844	4.15941
	1539	3.17014	3.17041
	1540	10.4459	0.640229
	1541	10.0062	0.609326
	1542	3.36248	0.290591
	1543	473.557	1.87526
	1544	8.10135	0.371883
	1545	16.7959	1.22734
	1546	22.5757	7.76716
	1547	2.10657	0.245481
	1548	14.6291	1.36372
	1549	2.43341	8.66515
	1550	7.47747	0.308352
	1551	14.4318	0.43402
	1552	7.00505	0.210552
	1553	82.7319	0.259467
	1554	408.586	1.24212
	1555	19.204	0.820216
	1556	7.99653	2.23337
	1557	4.54579	0.900004
	1558	120.11	1.96202
	1559	4.82704	0.71727
	1560	574.781	1.1128
	1561	21.3853	0.240117
	1562	242.065	0.236037
	1563	38.8361	1.31012
	1564	5.95042	0.342796
	1565	7.79087	0.106149
	1566	3.52605	1.73935
	1567	102.59	1.08186
	1568	14.4123	6.57438
	1569	11.4331	2.69586
	1570	5.2767	0.157428
	1571	34.3724	3.54769
	1572	5.7483	0.175004
	1573	18.5111	0.487643
	1574	427.954	5.07779
	1575	6.15619	0.727422
	1576	38.774	0.525144
	1577	2.73591	0.46983
	1578	18.5345	0.314554
	1579	8.82379	3.22502
	1580	3.03715	0.618402
	1581	3.40385	0.675862
	1582	6.35262	1.07084
	1583	20.7376	0.357473
	1584	408.741	0.769228
	1585	62.2478	0.276866
	1586	28.2732	0.254651
	1587	5.05235	3.42933
	1588	82.7611	0.451052
	1589	12.006	3.28119
	1590	7.45496	0.629322
	1591	15.9594	0.286201
	1592	52.23	1.18875
	1593	505.655	6.15073
	1594	462.045	2.3301
	1595	6.10401	1.34489
	1596	3.96715	0.257191
	1597	11.7281	3.02491
	1598	9.2324	0.512768
	1599	5.9402	1.28704
	1600	6.24513	0.394999
	1601	18.2474	0.859235
	1602	7.63981	0.266781
	1603	417.441	0.247479
	1604	235.301	0.667324
	1605	7.29672	0.395084
	1606	18.8954	1.43233
	1607	26.3184	1.21921
	1608	29.3978	6.83694
	1609	192.024	0.416954
	1610	2.41137	2.48675
	1611	24.8918	5.2787
	1612	20.5702	0.475954
	1613	9.09674	0.302436
	1614	5.79511	0.560763
	1615	7.787	2.83912
	1616	34.2724	0.350587
	1617	1.83235	2.90414
	1618	9.15569	4.64768
	1619	170.929	0.330332
	1620	6.80552	11.889
	1621	11.4585	0.318649
	1622	374.353	21.1614
	1623	292.048	2.22624
	1624	79.5934	0.624675
	1625	1.65528	0.263176
	1626	5.45008	0.235221
	1627	173.095	0.139845
	1628	2.78955	1.26733
	1629	484.482	3.3732
	1630	312.464	0.482617
	1631	18.4393	8.09709
	1632	50.3479	0.0486338
	1633	11.0764	0.702302
	1634	199.686	0.0759392
	1635	460.361	1.05239
	1636	14.1032	0.369657
	1637	10.1518	0.306981
	1638	10.0308	1.17146
	1639	90.2442	0.260539
	1640	22.7531	3.79523
	1641	8.36207	0.231317
	1642	32.9309	0.281911
	1643	2.23441	0.364147
	1644	18.4695	0.490995
	1645	413.657	0.942259
	1646	198.832	2.04061
	1647	16.8384	1.25312
	1648	318.845	11.0427
	1649	72.77	0.451024
	1650	8.20183	3.42801
	1651	12.12	0.225452
	1652	69.6063	0.546892
	1653	14.0294	0.23802
	1654	21.6125	0.528797
	1655	49.479	0.331535
	1656	164.011	0.708331
	1657	17.5567	6.67077
	1658	8.49764	2.84743
	1659	3.84742	0.369456
	1660	3.4686	0.369557
	1661	2.48873	1.49476
	1662	18.0293	0.281722
	1663	568.248	0.325716
	1664	6.94925	0.371931
	1665	8.13551	0.192497
	1666	242.787	1.83559
	1667	16.2498	0.381515
	1668	9.54698	0.710584
	1669	490.043	0.196374
	1670	19.3117	2.30642
	1671	2.47526	0.254815
	1672	21.1165	0.38989
	1673	189.157	0.398818
	1674	15.6037	0.55969
	1675	22.3709	0.666804
	1676	14.7263	0.364766
	1677	6.53668	6.14831
	1678	476.715	1.8119
	1679	488.906	0.962172
	1680	10.3058	0.522294
	1681	6.98355	0.505537
	1682	94.0412	0.23616
	1683	82.7823	0.464952
	1684	169.98	0.259241
	1685	25.2252	0.380906
	1686	6.25488	2.93024
	1687	63.9035	0.766592
	1688	20.2561	0.231462
	1689	5.29344	3.38003
	1690	9.89314	0.733049
	1691	5.9041	3.5511
	1692	6.00715	6.61526
	1693	132.33	8.69117
	1694	266.321	1.588
	1695	1.16883	0.21483
	1696	9.01568	1.93555
	1697	4.9683	0.276115
	1698	5.08514	0.286619
	1699	606.348	1.65689
	1700	0.662035	0.985575
	1701	9.65582	0.384726
	1702	23.8837	1.47735
	1703	5.80877	0.964396
	1704	5.47251	0.242451
	1705	35.6479	1.93391
	1706	180.094	31.6102
	1707	15.5304	2.75022
	1708	5.37752	0.442764
	1709	4.06697	0.638481
	1710	13.517	2.88713
	1711	19.3789	9.09903
	1712	8.08175	4.21531
	1713	36.1288	1.11234
	1714	14.6144	0.534188
	1715	18.7157	15.5616
	1716	16.3901	0.195174
	1717	12.2437	0.252897
	1718	2.787	4.62
	1719	10.8346	4.17156
	1720	8.35668	2.66864
	1721	3.5277	4.26858
	1722	19.6078	0.474718
	1723	26.281	5.54984
	1724	10.8927	0.307842
	1725	16.0526	0.125816
	1726	43.3033	4.38518
	1727	1.27909	0.348883
	1728	484.775	1.39397
	1729	113.408	1.35519
	1730	17.476	0.233958
	1731	141.851	0.929163
	1732	46.0734	1.47671
	1733	5.99552	1.2403
	1734	406.966	7.44976
	1735	31.8685	0.597344
	1736	28.1465	0.260502
	1737	394.804	0.590254
	1738	17.5386	0.290334
	1739	13.1702	0.269156
	1740	20.9991	0.318807
	1741	5.72768	3.22465
	1742	8.60229	0.376974
	1743	10.8537	0.562982
	1744	10.9403	3.65078
	1745	6.36684	1.97806
	1746	27.2141	0.468545
	1747	2.87385	1.24072
	1748	515.187	3.528
	1749	25.5576	0.566509
	1750	18.5871	0.290769
	1751	2.95844	2.48127
	1752	3.88204	0.400476
	1753	514.41	1.07617
	1754	3.74096	0.302118
	1755	2.90901	0.474281
	1756	12.5752	0.231451
	1757	12.8943	2.28905
	1758	4.9919	2.64643
	1759	12.4552	0.345006
	1760	24.7289	0.266528
	1761	20.5213	4.14003
	1762	27.4364	4.4638
	1763	7.72267	0.753183
	1764	17.4183	0.255183
	1765	12.2077	1.6936
	1766	171.289	0.340534
	1767	1.59233	0.418296
	1768	119.271	9.69958
	1769	16.6706	0.456774
	1770	9.85879	0.592122
	1771	11.0913	1.24612
	1772	159.01	23.5553
	1773	402.301	1.49436
	1774	31.8433	6.71429
	1775	20.6094	0.185236
	1776	8.75623	13.6391
	1777	13.3938	11.5404
	1778	11.4128	2.69911
	1779	20.4255	0.335341
	1780	20.0211	0.482295
	1781	157.902	3.15131
	1782	51.869	12.9576
	1783	42.7032	2.40004
	1784	13.2817	9.57188
	1785	15.2012	0.223109
	1786	14.2883	0.191133
	1787	117.625	109.082
	1788	260.498	91.3969
	1789	19.9816	6.61268
	1790	9.54087	0.197513
	1791	125.494	0.220079
	1792	9.83547	0.223247
	1793	8.14407	0.243066
	1794	162.45	1.02364
	1795	14.4742	0.277812
	1796	7.7283	2.95965
	1797	17.2563	11.09
	1798	7.59124	0.395731
	1799	15.0922	0.246571
	1800	26.9043	0.458675
	1801	305.717	0.351404
	1802	3.24446	0.253234
	1803	2.46215	0.532212
	1804	9.44609	2.96079
	1805	7.36978	0.233631
	1806	13.2742	0.412639
	1807	27.7196	20.4092
	1808	14.6881	0.206868
	1809	6.60904	0.163504
	1810	20.6711	1.79619
	1811	14.4964	0.31037
	1812	3.6711	1.38055
	1813	9.66517	0.191306
	1814	3.06202	0.450526
	1815	107.317	0.776135
	1816	26.8563	4.16328
	1817	8.12058	0.523127
	1818	15.1644	0.423918
	1819	10.6718	0.561894
	1820	187.392	0.415295
	1821	3.86872	1.48929
	1822	6.6833	0.303733
	1823	26.2797	2.50458
	1824	214.713	0.291503
	1825	214.831	1.7968
	1826	14.966	1.599
	1827	291.417	0.717032
	1828	9.65209	0.219915
	1829	3.46309	0.647707
	1830	13.3829	0.294621
	1831	12.4826	1.41999
	1832	9.90827	5.51113
	1833	332.727	25.2337
	1834	6.66205	2.21858
	1835	159.027	0.339375
	1836	237.256	0.317585
	1837	158.148	0.344264
	1838	3.3617	1.80579
	1839	19.5102	2.23805
	1840	15.4009	0.194053
	1841	8.03951	0.193053
	1842	15.1826	0.382167
	1843	0.647399	0.858105
	1844	356.439	0.300774
	1845	1.16378	0.421407
	1846	70.0589	16.6034
	1847	6.51418	0.782009
	1848	5.56981	0.468342
	1849	3.15969	0.518586
	1850	237.958	0.219823
	1851	4.84856	5.45558
	1852	29.263	5.38702
	1853	9.39567	2.60259
	1854	65.3921	0.252721
	1855	235.716	4.34215
	1856	212.362	1.64778
	1857	26.1615	0.359957
	1858	16.7757	0.462787
	1859	132.462	0.632979
	1860	4.58618	0.360456
	1861	5.10773	1.63829
	1862	23.235	3.21725
	1863	32.5418	8.79503
	1864	4.36077	1.55943
	1865	7.94712	2.21733
	1866	4.04773	1.91792
	1867	179.595	1.51631
	1868	10.5609	4.10867
	1869	76.534	0.68195
	1870	6.70746	0.244745
	1871	8.3109	0.155356
	1872	513.025	6.76486
	1873	14.3665	0.112135
	1874	4.19038	0.163423
	1875	11.8198	0.132119
	1876	21.0259	4.72383
	1877	9.23895	0.27686
	1878	17.3211	0.479708
	1879	3.00802	0.332317
	1880	15.2267	0.0856883
	1881	131.106	4.08238
	1882	14.9612	0.272978
	1883	15.9019	0.548706
	1884	239.001	0.45736
	1885	6.92832	0.203742
	1886	21.1683	8.32375
	1887	2.09403	0.137099
	1888	355.572	41.7216
	1889	7.26439	2.8602
	1890	16.1631	0.298533
	1891	57.8132	0.296323
	1892	11.6065	3.48943
	1893	507.782	0.987334
	1894	15.2261	4.14892
	1895	28.4123	0.316557
	1896	240.99	6.04767
	1897	10.0293	0.154284
	1898	15.3193	0.142955
	1899	14.155	0.154412
	1900	13.0392	0.187814
	1901	17.4523	0.278439
	1902	20.3425	2.95687
	1903	12.9354	0.199971
	1904	474.281	2.79451
	1905	22.4295	0.349097
	1906	4.57606	1.43588
	1907	11.7639	0.119457
	1908	20.9089	2.97417
	1909	26.0892	4.86376
	1910	10.4152	2.14151
	1911	3.34979	0.254808
	1912	13.2381	0.836645
	1913	587.991	1.73694
	1914	108.067	0.223936
	1915	390.42	0.556615
	1916	14.3187	3.7433
	1917	12.0394	6.36204
	1918	5.78888	7.01425
	1919	22.5164	0.168955
	1920	79.7857	2.01678
	1921	269.642	11.041
	1922	6.12444	0.0866874
	1923	18.0909	0.849471
	1924	7.28735	6.98348
	1925	12.8354	0.157701
	1926	359.651	19.6254
	1927	12.7307	0.32689
	1928	80.6598	11.8423
	1929	539.319	0.402138
	1930	600.275	0.703321
	1931	15.4568	1.82345
	1932	314.704	0.451004
	1933	6.88033	0.463832
	1934	7.52029	0.176642
	1935	24.1724	0.446809
	1936	34.4714	2.06771
	1937	203.691	1.27831
	1938	11.6203	0.526712
	1939	107.206	22.2689
	1940	3.9659	0.242016
	1941	494.47	1.30853
	1942	8.89936	0.348612
	1943	9.22466	0.199644
	1944	57.5216	13.9301
	1945	11.4729	2.57871
	1946	83.6949	3.96083
	1947	197.4	0.642284
	1948	4.96823	0.130739
	1949	12.935	0.47729
	1950	8.97891	0.922556
	1951	19.9553	0.223617
	1952	7.06744	1.88594
	1953	91.5505	0.235811
	1954	15.1161	0.216243
	1955	63.5851	42.9725
	1956	18.6756	0.326529
	1957	274.215	0.974794
	1958	20.0123	4.89257
	1959	6.45909	0.284354
	1960	9.25973	0.17472
	1961	9.48161	0.182019
	1962	25.5526	1.76369
	1963	11.5247	3.57013
	1964	5.61749	0.207964
	1965	99.474	0.0882217
	1966	16.1537	1.23665
	1967	14.5648	0.290385
	1968	25.2934	0.3424
	1969	1187.34	0.148939
	1970	207.156	0.993235
	1971	100.733	0.377788
	1972	4.14742	0.352946
	1973	26.4607	0.260922
	1974	25.9822	0.547278
	1975	7.44743	0.540498
	1976	242.04	89.755
	1977	38.42	16.2957
	1978	31.4913	0.569931
	1979	164.974	0.490459
	1980	16.761	7.25667
	1981	9.95047	0.113732
	1982	284.345	2.17717
	1983	461.599	0.392099
	1984	6.27127	0.658861
	1985	2.37948	0.897197
	1986	108.891	25.8837
	1987	21.9345	0.430958
	1988	91.1065	2.20549
	1989	7.91347	0.577406
	1990	169.893	0.237548
	1991	12.804	1.03413
	1992	18.3589	0.429885
	1993	10.9875	0.319634
	1994	9.52758	0.958729
	1995	20.48	0.421945
	1996	17.7632	0.4991
	1997	15.8511	3.53908
	1998	8.3291	1.08311
[truncated: 1,448 more rows]
